# Supplementary material
Source: PubMed Central journal article supplement (PMC10118286)
Supplement: NIHMS1885989-supplement-1.pdf [file NIHMS1885989-supplement-1.pdf]

## Supporting Information

### **Discovery of Novel Dual-Target Inhibitor of Bromodomain-Containing Protein 4/Casein Kinase 2 Inducing Apoptosis and Autophagy-Associated Cell Death for Triple-Negative Breast Cancer Therapy**

Jifa Zhang<sup>†,‡</sup>, Pan Tang<sup>†,‡</sup>, Ling Zou<sup>†,‡</sup>, Jin Zhang<sup>†,‡</sup>, Juncheng Chen<sup>†</sup>, Chengcan Yang<sup>†</sup>, Gu He<sup>†</sup>, Bo Liu<sup>†</sup>, Jie Liu<sup>†</sup>, Cheng-Ming Chiang<sup>§</sup>, Guan Wang<sup>†,\*</sup>, Tinghong Ye<sup>†,\*</sup>, Liang Ouyang<sup>†,\*</sup>

<sup>†</sup>State Key Laboratory of Biotherapy and Cancer Center, Sichuan University-Oxford University Huaxi Gastrointestinal Cancer Centre, Innovation Center of Nursing Research, Nursing Key Laboratory of Sichuan Province, National Clinical Research Center for Geriatrics, West China Hospital of Sichuan University, Chengdu 610041, Sichuan, China.

<sup>‡</sup>School of Pharmaceutical Sciences, Health Science Center, Shenzhen University, Shenzhen, 518060, China.

<sup>§</sup>Simmons Comprehensive Cancer Center, Department of Pharmacology, and Department of Biochemistry, University of Texas Southwestern Medical Center, Dallas, TX 75390, USA.

#### **Corresponding Author**

\*G.W. E-mail: guan8079@163.com. Phone: (+86)28-85164063.

\*T.Y. E-mail: yeth1309@scu.edu.cn. Phone: (+86)28-85503817.

\*L.O. E-mail: ouyangliang@scu.edu.cn. Phone: (+86)28-85503817.

<sup>†</sup>These authors contributed equally to this work.

\*Corresponding Authors.

## Table of Contents

|                  |             |
|------------------|-------------|
| <b>Figure S1</b> | <b>S3</b>   |
| <b>Figure S2</b> | <b>S3</b>   |
| <b>Figure S3</b> | <b>S4</b>   |
| <b>Figure S4</b> | <b>S4</b>   |
| <b>Figure S5</b> | <b>S5</b>   |
| <b>Figure S6</b> | <b>S5</b>   |
| <b>Figure S7</b> | <b>S6</b>   |
| <b>Figure S8</b> | <b>S6</b>   |
| <b>Figure S9</b> | <b>S7</b>   |
| <b>Table S1</b>  | <b>S8</b>   |
| <b>NMR data</b>  | <b>S16</b>  |
| <b>MS data</b>   | <b>S84</b>  |
| <b>HPLC data</b> | <b>S106</b> |

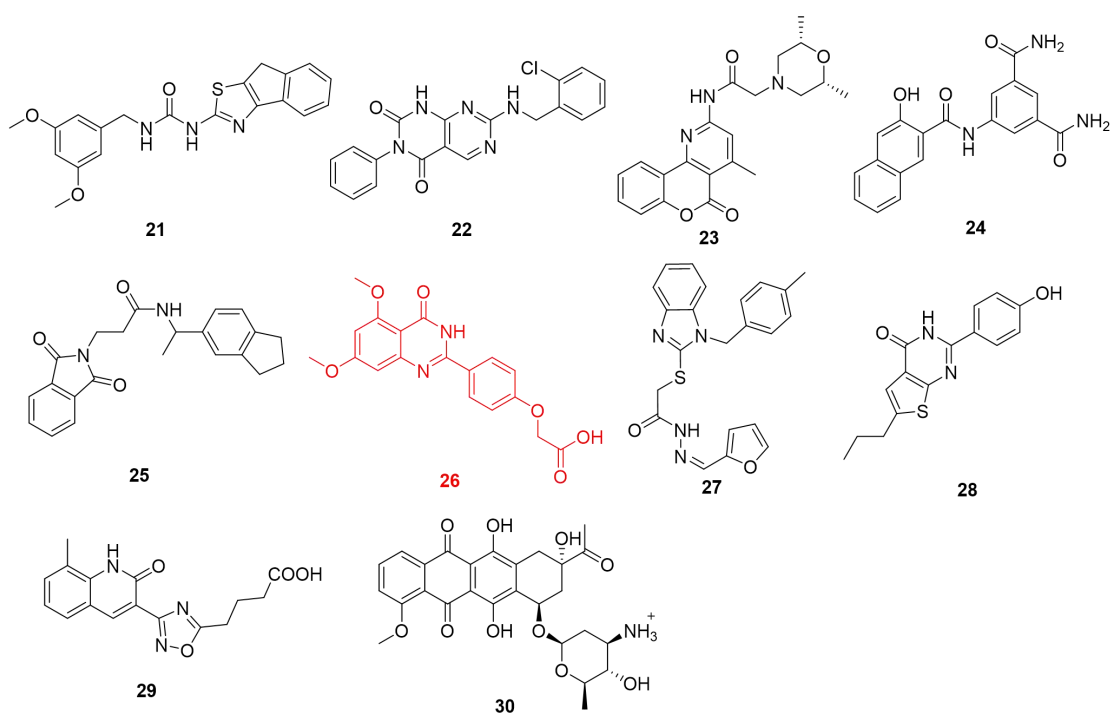

**Figure S1.** The top 10 candidate dual-target inhibitors of BRD4 and CK2 were selected.

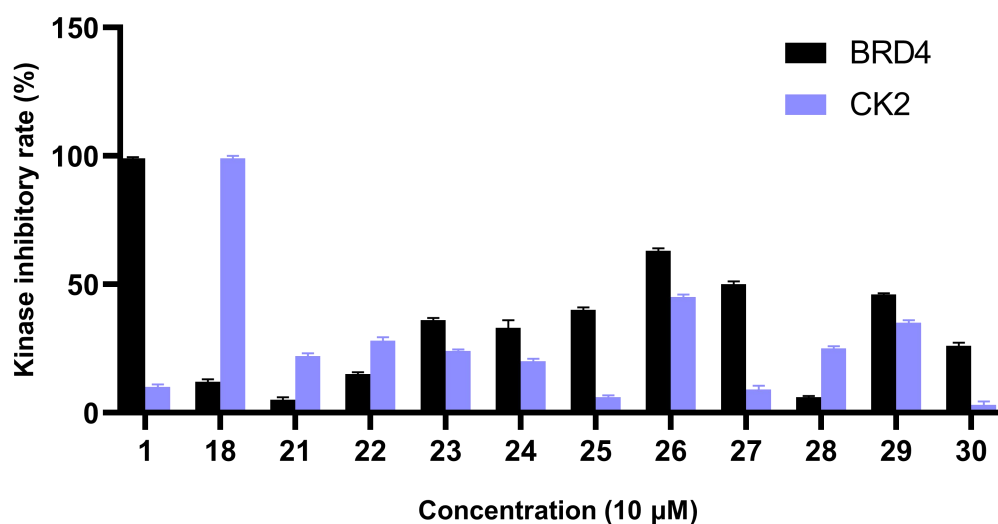

**Figure S2.** BRD4 and CK2 inhibition rates of top 10 candidate compounds. The inhibitory activity of BRD4 and CK2 for top 10 candidate compounds (21-30) were detected at 10 μM. JQ1 (1) and CX-4945 (18) were used as referenced BRD4 inhibitor and CK2 inhibitor, respectively.

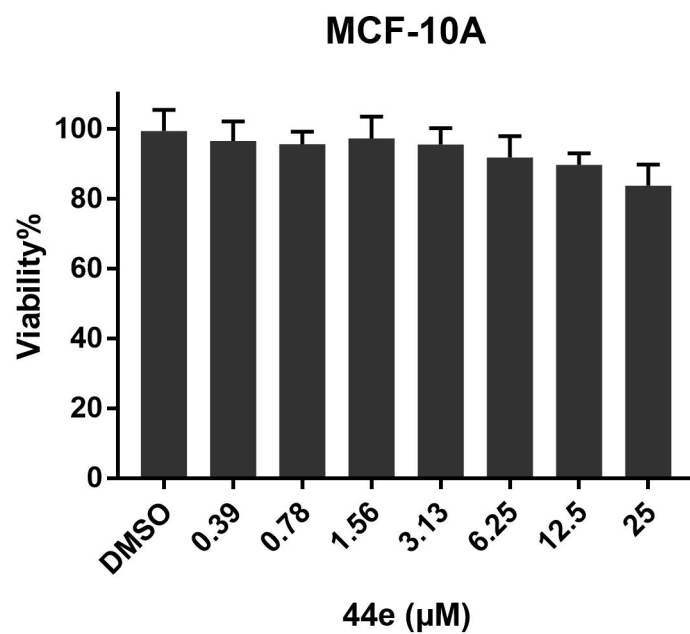

**Figure S3.** Toxicity of candidate compound **44e** to MCF-10A cell.

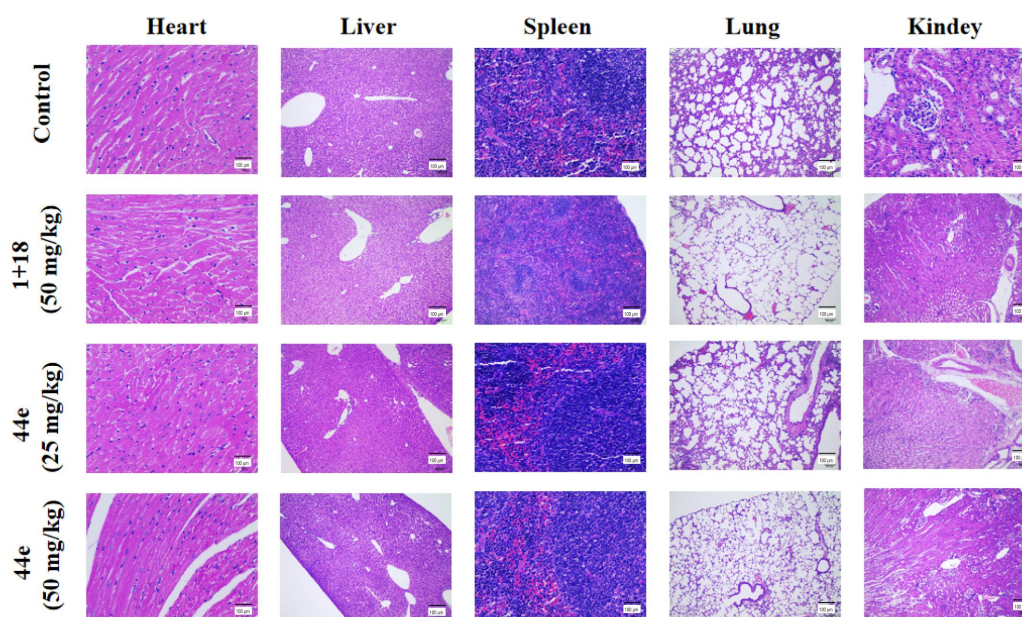

**Figure S4.** Representative images of main organ tissues after staining with hematoxylin-eosin (H&E) in MDA-MB-231 tumor xenograft model. Scale bar, 100 µm.

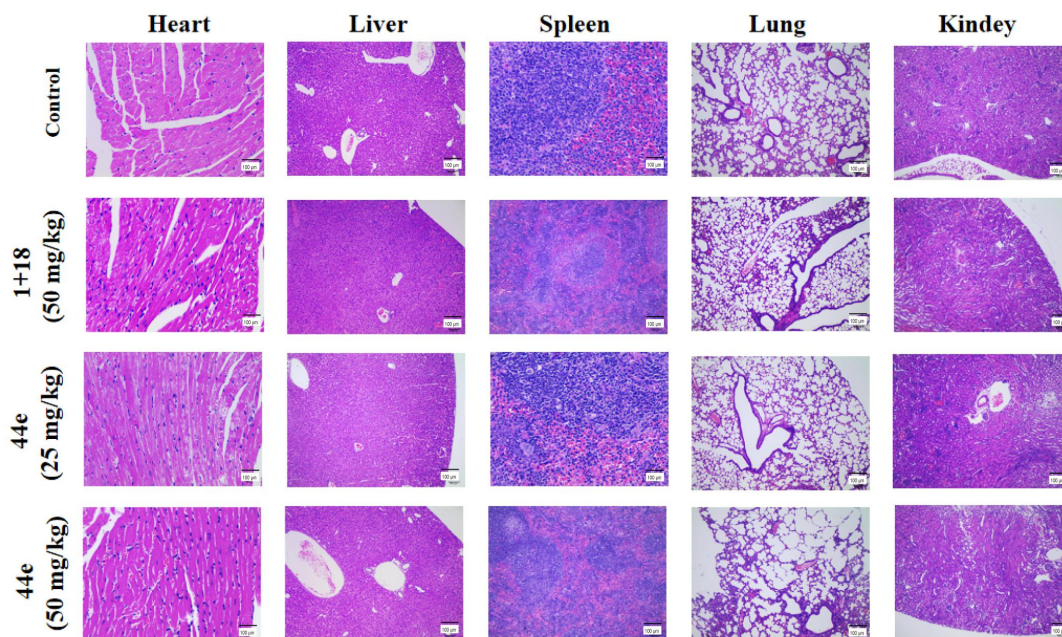

**Figure S5.** Representative images of main organ tissues after staining with hematoxylin-eosin (H&E) in MDA-MB-468 tumor xenograft model. Scale bar, 100  $\mu\text{m}$ .

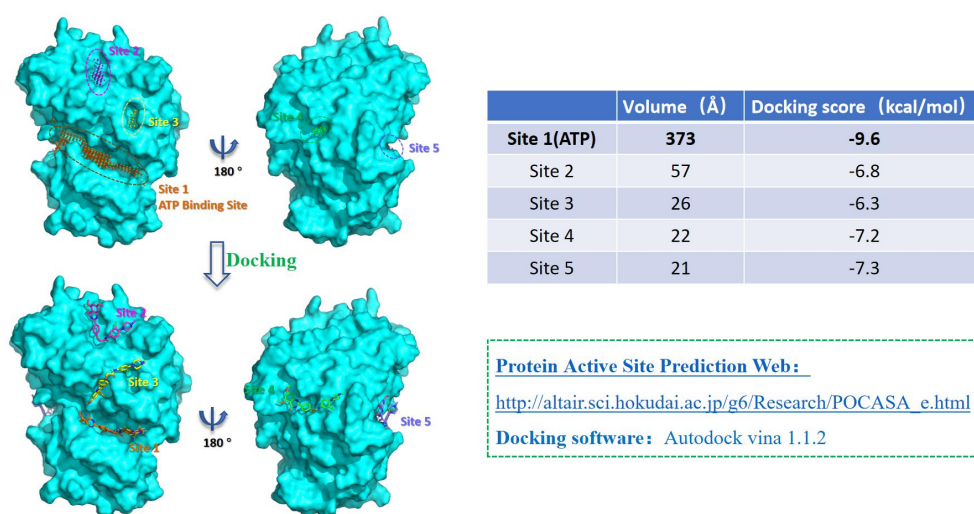

**Figure S6.** 44e was docked and scored with the 5 potential active sites of CK2.

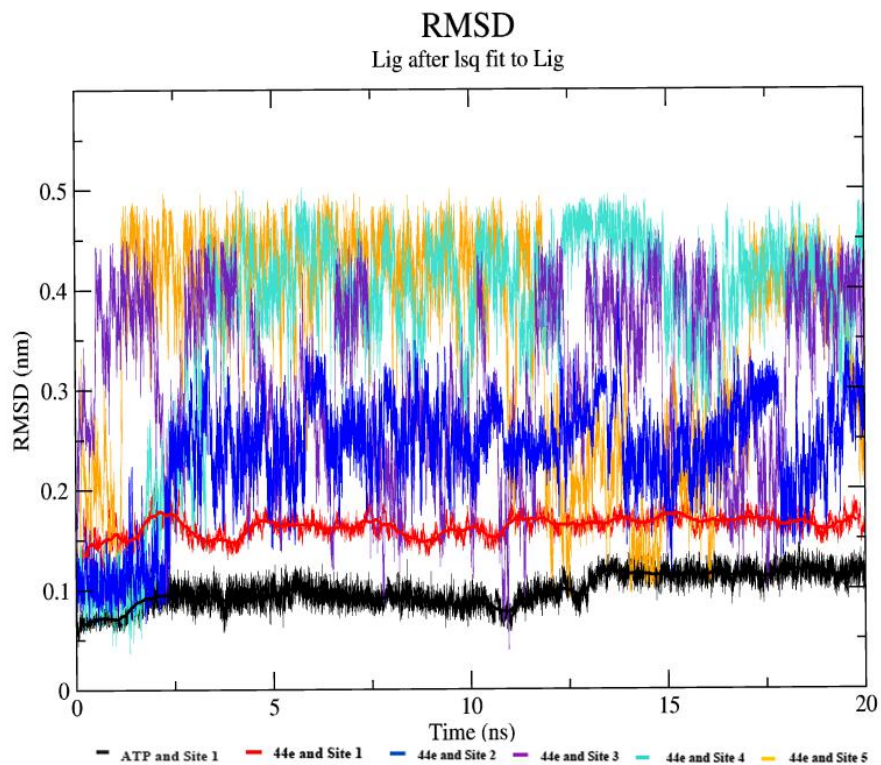

**Figure S7.** Root mean square deviation (RMSD) of ATP and compound **44e** on 5 potential active sites of CK2.

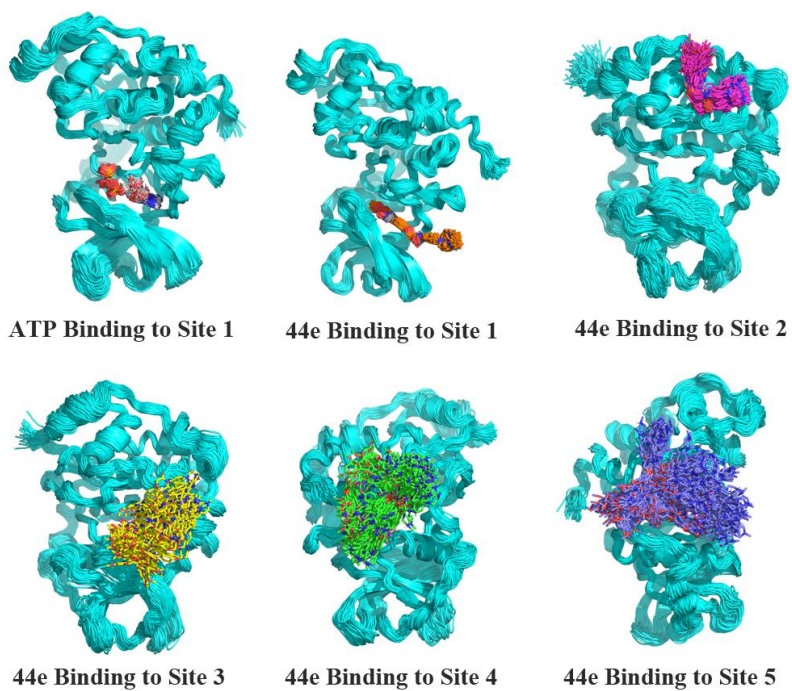

**Figure S8.** Molecular dynamics conformation superposition of ATP and compound **44e** (200 frames) on 5 potential active sites of CK2.

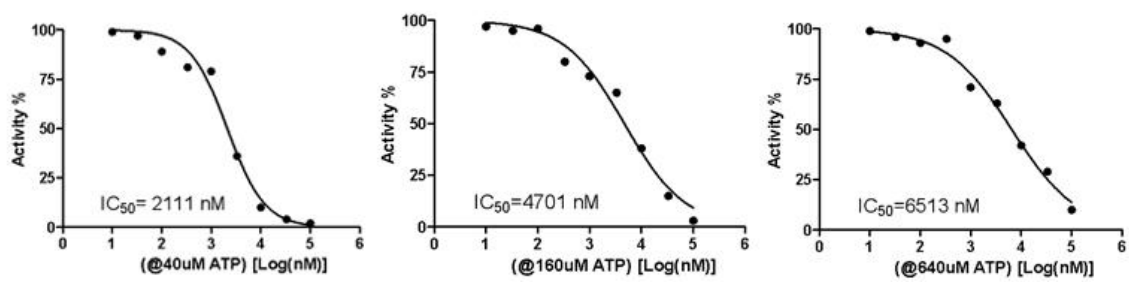

**Figure S9.** ATP competitive binding test. The inhibition rate of compound **44e** on CK2 was tested at ATP concentrations of 40  $\mu$ M, 160  $\mu$ M and 640  $\mu$ M.

**Table S1.** Selectivity profiling of compound **44e** at 1000 nM against 412 kinases.

| Kinase             | Activity% | Kinase            | Activity% |
|--------------------|-----------|-------------------|-----------|
| AAK1(h)            | 87        | MARK3(h)          | 62        |
| Abl (H396P) (h)    | 90        | MARK4(h)          | 70        |
| Abl (M351T)(h)     | 74        | MEK1(h)           | 95        |
| Abl (Q252H) (h)    | 79        | MEK2(h)           | 98        |
| Abl(h)             | 96        | MEKK2(h)          | 84        |
| Abl(T315I)(h)      | 112       | MEKK3(h)          | 76        |
| Abl(Y253F)(h)      | 134       | MELK(h)           | 104       |
| ACK1(h)            | 98        | Mer(h)            | 72        |
| ACTR2(h)           | 78        | Met(D1246H)(h)    | 85        |
| ALK(h)             | 83        | Met(D1246N)(h)    | 93        |
| ALK1(h)            | 107       | Met(h)            | 77        |
| ALK2(h)            | 86        | Met(M1268T)(h)    | 82        |
| ALK4(h)            | 90        | Met(Y1248C)(h)    | 105       |
| ALK6(h)            | 95        | Met(Y1248D)(h)    | 79        |
| AMPK $\alpha$ 1(h) | 93        | Met(Y1248H)(h)    | 87        |
| AMPK $\alpha$ 2(h) | 107       | MINK(h)           | 70        |
| A-Raf(h)           | 88        | MKK3(h)           | 58        |
| Arg(h)             | 85        | MKK6(h)           | 80        |
| ARK5(h)            | 94        | MLCK(h)           | 73        |
| ASK1(h)            | 78        | MLK1(h)           | 81        |
| ATM(h)             | 90        | MLK2(h)           | 75        |
| ATR/ATRIP(h)       | 81        | MLK3(h)           | 94        |
| Aurora-A(h)        | 85        | MLK4(h)           | 76        |
| Aurora-B(h)        | 96        | Mnk2(h)           | 72        |
| Aurora-C(h)        | 87        | MOK(h)            | 36        |
| Axl(h)             | 92        | MRCK $\alpha$ (h) | 80        |



|                     |     |                   |     |
|---------------------|-----|-------------------|-----|
| BIK $\epsilon$ (h)  | 83  | MRCK $\beta$ (h)  | 120 |
| Blk(h)              | 76  | MRCK $\gamma$ (h) | 105 |
| BMPR2(h)            | 81  | MSK1(h)           | 87  |
| Bmx(h)              | 107 | MSK2(h)           | 92  |
| B-Raf(h)            | 93  | MSSK1(h)          | 94  |
| B-Raf(V599E)(h)     | 77  | MST1(h)           | 76  |
| BRK(h)              | 103 | MST2(h)           | 88  |
| BrSK1(h)            | 85  | MST3(h)           | 93  |
| BrSK2(h)            | 88  | MST4(h)           | 75  |
| BTK(h)              | 79  | mTOR(h)           | 79  |
| BTK(R28H)(h)        | 82  | mTOR/FKBP12(h)    | 80  |
| CaMKI(h)            | 58  | MuSK(h)           | 106 |
| CaMKII $\alpha$ (h) | 72  | MYLK2(h)          | 82  |
| CaMKII $\beta$ (h)  | 90  | MYO3B(h)          | 93  |
| CaMKII $\gamma$ (h) | 85  | NDR1(h)           | 70  |
| CaMKII $\delta$ (h) | 93  | NDR2(h)           | 65  |
| CaMKI $\beta$ (h)   | 91  | NEK1(h)           | 90  |
| CaMKIV(h)           | 84  | NEK11(h)          | 92  |
| CaMKI $\gamma$ (h)  | 73  | NEK2(h)           | 102 |
| CaMKI $\delta$ (h)  | 75  | NEK3(h)           | 96  |
| CaMKK1(h)           | 82  | NEK4(h)           | 88  |
| CaMKK2(h)           | 70  | NEK6(h)           | 79  |
| Cdc7/cyclinB1(h)    | 82  | NEK7(h)           | 68  |
| CDK1/cyclinB(h)     | 47  | NEK9(h)           | 91  |
| CDK12/cyclinK(h)    | 80  | NIM1(h)           | 90  |
| CDK13/cyclinK(h)    | 72  | NLK(h)            | 93  |
| CDK14/cyclinY(h)    | 95  | NUAK2(h)          | 72  |
| CDK16/cyclinY(h)    | 95  | OSR1(h)           | 37  |

|                     |     |                           |     |
|---------------------|-----|---------------------------|-----|
| CDK17/cyclinY(h)    | 79  | p70S6K(h)                 | 68  |
| CDK18/cyclinY(h)    | 82  | PAK1(h)                   | 91  |
| CDK2/cyclinA(h)     | 90  | PAK2(h)                   | 87  |
| CDK2/cyclinE(h)     | 123 | PAK3(h)                   | 75  |
| CDK3/cyclinE(h)     | 86  | PAK4(h)                   | 95  |
| CDK4/cyclinD3(h)    | 97  | PAK5(h)                   | 103 |
| CDK5/p25(h)         | 70  | PAK6(h)                   | 89  |
| CDK5/p35(h)         | 73  | PAR-1B $\alpha$ (h)       | 90  |
| CDK6/cyclinD3(h)    | 98  | PASK(h)                   | 79  |
| CDK7/cyclinH/MAT1(h |     |                           |     |
| )                   | 102 | PDGFR $\alpha$ (D842V)(h) | 67  |
| CDK9/cyclin T1(h)   | 117 | PDGFR $\alpha$ (h)        | 75  |
| CDKL1(h)            | 60  | PDGFR $\alpha$ (V561D)(h) | 78  |
| CDKL2(h)            | 82  | PDGFR $\beta$ (h)         | 92  |
| CDKL3(h)            | 79  | PDHK2(h)                  | 83  |
| CDKL4(h)            | 83  | PDHK4(h)                  | 75  |
| ChaK1(h)            | 92  | PDK1(h)                   | 86  |
| CHK1(h)             | 95  | PEK(h)                    | 105 |
| CHK2(h)             | 80  | PhK $\gamma$ 1(h)         | 66  |
| CHK2(I157T)(h)      | 77  | PhK $\gamma$ 2(h)         | 78  |
|                     |     | PI3 Kinase                |     |
|                     |     | (p110a(E542K)/p85a        |     |
| CHK2(R145W)(h)      | 75  | ) (h)                     | 72  |
|                     |     | PI3 Kinase                |     |
|                     |     | (p110a(E545K)/p85a        |     |
| CK1 $\alpha$ (h)    | 95  | ) (h)                     | 84  |
|                     |     | PI3 Kinase                |     |
|                     |     | (p110a(H1047R)/p85        |     |
| CK1 $\gamma$ 1(h)   | 98  | a) (h)                    | 96  |

|                    |     |                    |     |
|--------------------|-----|--------------------|-----|
|                    |     | PI3 Kinase         |     |
| CK1 $\gamma$ 2(h)  | 110 | (p110a/p65a)(h)    | 114 |
|                    |     | PI3 Kinase         |     |
| CK1 $\gamma$ 3(h)  | 94  | (p110a/p85a)(h)    | 89  |
|                    |     | PI3 Kinase         |     |
| CK1 $\delta$ (h)   | 96  | (p110b/p85a)(h)    | 73  |
|                    |     | PI3 Kinase         |     |
| CK1 $\epsilon$ (h) | 107 | (p110d/p85a)(h)    | 86  |
|                    |     | PI3 Kinase         |     |
| CK2(h)             | 0   | (p120g)(h)         | 93  |
| CK2 $\alpha$ 1(h)  | 20  | PI3KC2a(h)         | 75  |
| CK2 $\alpha$ 2(h)  | 34  | PI3KC2g(h)         | 69  |
| cKit(D816H)(h)     | 80  | Pim-1(h)           | 55  |
| cKit(D816V)(h)     | 97  | Pim-2(h)           | 62  |
| cKit(h)            | 106 | Pim-3(h)           | 68  |
| cKit(V560G)(h)     | 98  | PIP4K2a(h)         | 75  |
| cKit(V654A)(h)     | 101 | PIP5K1a(h)         | 81  |
| CLK1(h)            | 85  | PIP5K1g(h)         | 90  |
| CLK1(h)            | 70  | PKA(h)             | 77  |
| CLK2(h)            | 45  | PKAc $\beta$ (h)   | 69  |
| CLK3(h)            | 59  | PKB $\alpha$ (h)   | 78  |
| CLK4(h)            | 84  | PKB $\beta$ (h)    | 92  |
| c-RAF(h)           | 90  | PKB $\gamma$ (h)   | 95  |
| CRIK(h)            | 105 | PKC $\alpha$ (h)   | 84  |
| CSK(h)             | 83  | PKC $\beta$ I(h)   | 79  |
| cSRC(h)            | 60  | PKC $\beta$ II(h)  | 80  |
| DAPK1(h)           | 88  | PKC $\gamma$ (h)   | 115 |
| DAPK2(h)           | 108 | PKC $\delta$ (h)   | 90  |
| DCAMKL1(h)         | 81  | PKC $\epsilon$ (h) | 65  |

|                          |     |                   |     |
|--------------------------|-----|-------------------|-----|
| DCAMKL2(h)               | 75  | PKC $\zeta$ (h)   | 70  |
| DCAMKL3(h)               | 120 | PKC $\eta$ (h)    | 73  |
| DDR1(h)                  | 93  | PKC $\theta$ (h)  | 78  |
| DDR2(h)                  | 80  | PKC $\iota$ (h)   | 80  |
| DMPK(h)                  | 77  | PKC $\mu$ (h)     | 84  |
| DNA-PK(h)                | 75  | PKD2(h)           | 102 |
| DRAK1(h)                 | 89  | PKD3(h)           | 96  |
| DRAK2(h)                 | 94  | PKG1 $\alpha$ (h) | 71  |
| DYRK1A(h)                | 48  | PKG1 $\beta$ (h)  | 80  |
| DYRK1B(h)                | 45  | PKR(h)            | 64  |
| DYRK2(h)                 | 55  | Plk1(h)           | 73  |
| DYRK3(h)                 | 40  | Plk3(h)           | 90  |
| eEF-2K(h)                | 79  | Plk4(h)           | 102 |
| EGFR(h)                  | 78  | PRAK(h)           | 59  |
| EGFR(L858R)(h)           | 93  | PRK1(h)           | 72  |
| EGFR(L861Q)(h)           | 86  | PRK2(h)           | 68  |
| EGFR(T790M)(h)           | 76  | PRKG2(h)          | 91  |
| EGFR(T790M,L858R)(<br>h) | 90  | PrKX(h)           | 60  |
| EphA1(h)                 | 115 | PRP4(h)           | 71  |
| EphA2(h)                 | 98  | PTK5(h)           | 83  |
| EphA3(h)                 | 102 | Pyk2(h)           | 48  |
| EphA4(h)                 | 84  | Ret (V804L)(h)    | 70  |
| EphA5(h)                 | 85  | Ret(h)            | 80  |
| EphA7(h)                 | 96  | Ret(V804M)(h)     | 75  |
| EphA8(h)                 | 74  | RIPK1(h)          | 92  |
| EphB1(h)                 | 110 | RIPK2(h)          | 84  |
| EphB2(h)                 | 105 | ROCK-I(h)         | 84  |

|                 |     |                  |     |
|-----------------|-----|------------------|-----|
| EphB3(h)        | 88  | ROCK-II(h)       | 79  |
| EphB4(h)        | 96  | Ron(h)           | 74  |
| ErbB2(h)        | 79  | Ros(h)           | 67  |
| ErbB4(h)        | 92  | Rse(h)           | 69  |
| FAK(h)          | 80  | Rsk1(h)          | 80  |
| Fer(h)          | 99  | Rsk2(h)          | 99  |
| Fes(h)          | 68  | Rsk3(h)          | 65  |
| FGFR1(h)        | 50  | Rsk4(h)          | 105 |
| FGFR1(V561M)(h) | 90  | SAPK2a(h)        | 70  |
| FGFR2(h)        | 83  | SAPK2a(T106M)(h) | 95  |
| FGFR2(N549H)(h) | 82  | SAPK2b(h)        | 88  |
| FGFR3(h)        | 70  | SAPK3(h)         | 81  |
| FGFR4(h)        | 103 | SAPK4(h)         | 70  |
| Fgr(h)          | 91  | SBK1(h)          | 25  |
| Flt1(h)         | 94  | SGK(h)           | 106 |
| Flt3(D835Y)(h)  | 110 | SGK2(h)          | 92  |
| Flt3(h)         | 69  | SGK3(h)          | 80  |
| Flt4(h)         | 95  | SIK(h)           | 110 |
| Fms(h)          | 98  | SIK2(h)          | 94  |
| Fms(Y969C)(h)   | 87  | SIK3(h)          | 85  |
| Fyn(h)          | 105 | SLK(h)           | 79  |
| GCK(h)          | 42  | Snk(h)           | 28  |
| GCN2(h)         | 80  | SNRK(h)          | 97  |
| GRK1(h)         | 87  | Src(1-530)(h)    | 83  |
| GRK2(h)         | 65  | Src(T341M)(h)    | 88  |
| GRK3(h)         | 70  | SRMS(h)          | 90  |
| GRK5(h)         | 86  | SRPK1(h)         | 93  |
| GRK6(h)         | 95  | SRPK2(h)         | 82  |

|                      |     |                  |     |
|----------------------|-----|------------------|-----|
| GRK7(h)              | 78  | STK16(h)         | 79  |
| GSK3 $\alpha$ (h)    | 105 | STK25(h)         | 81  |
| GSK3 $\beta$ (h)     | 97  | STK32A(h)        | 96  |
| Haspin(h)            | 78  | STK32B(h)        | 85  |
| Hck(h)               | 92  | STK32C(h)        | 70  |
| Hck(h) activated     | 95  | STK33(h)         | 114 |
| HIPK1(h)             | 83  | STK39(h)         | 84  |
| HIPK2(h)             | 73  | Syk(h)           | 40  |
| HIPK3(h)             | 90  | TAF1L(h)         | 65  |
| HIPK4(h)             | 110 | TAK1(h)          | 93  |
| HPK1(h)              | 77  | TAO1(h)          | 85  |
| HRI(h)               | 85  | TAO2(h)          | 78  |
| ICK(h)               | 75  | TAO3(h)          | 60  |
| IGF-1R(h)            | 104 | TBK1(h)          | 128 |
| IGF-1R(h), activated | 99  | Tec(h) activated | 79  |
| IKK $\alpha$ (h)     | 107 | TGFBR1(h)        | 81  |
| IKK $\beta$ (h)      | 84  | TGFBR2(h)        | 88  |
| IKK $\epsilon$ (h)   | 89  | Tie2 (h)         | 119 |
| IR(h)                | 96  | Tie2(R849W)(h)   | 83  |
| IR(h), activated     | 115 | Tie2(Y897S)(h)   | 80  |
| IRAK1(h)             | 112 | TLK1(h)          | 49  |
| IRAK4(h)             | 99  | TLK2(h)          | 34  |
| IRE1(h)              | 72  | TNIK(h)          | 87  |
| IRR(h)               | 45  | TRB2(h)          | 91  |
| Itk(h)               | 116 | TrkA(h)          | 79  |
| JAK1(h)              | 80  | TrkB(h)          | 82  |
| JAK2(h)              | 75  | TrkC(h)          | 90  |
| JAK3(h)              | 91  | TSSK1(h)         | 118 |

|                    |     |           |     |
|--------------------|-----|-----------|-----|
| JNK1 $\alpha$ 1(h) | 89  | TSSK2(h)  | 99  |
| JNK2 $\alpha$ 2(h) | 75  | TSSK3(h)  | 74  |
| JNK3(h)            | 82  | TSSK4(h)  | 84  |
| KDR(h)             | 93  | TTBK1(h)  | 80  |
| LATS1(h)           | 92  | TTBK2(h)  | 96  |
| LATS2(h)           | 104 | TTK(h)    | 102 |
| Lck(h) activated   | 90  | Txk(h)    | 70  |
| LIMK1(h)           | 85  | TYK2(h)   | 89  |
| LIMK2(h)           | 94  | ULK1(h)   | 92  |
| LKB1(h)            | 110 | ULK2(h)   | 126 |
| LOK(h)             | 97  | ULK3(h)   | 88  |
| LRRK2(h)           | 75  | VRK1(h)   | 84  |
| LTK(h)             | 60  | VRK2(h)   | 67  |
| Lyn(h)             | 73  | Wee1(h)   | 80  |
| MAK(h)             | 87  | Wee1B(h)  | 92  |
| MAP4K3(h)          | 90  | WNK1(h)   | 74  |
| MAP4K4(h)          | 76  | WNK2(h)   | 103 |
| MAP4K5(h)          | 85  | WNK3(h)   | 82  |
| MAPK1(h)           | 93  | WNK4(h)   | 110 |
| MAPK2(h)           | 98  | Yes(h)    | 61  |
| MAPKAP-K2(h)       | 106 | ZAK(h)    | 89  |
| MAPKAP-K3(h)       | 120 | ZAP-70(h) | 93  |
| MARK1(h)           | 88  | ZIPK(h)   | 72  |

---

## 2. NMR Spectra Data

### 33a

0YL-YCC-200612-1.1.fid

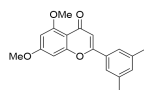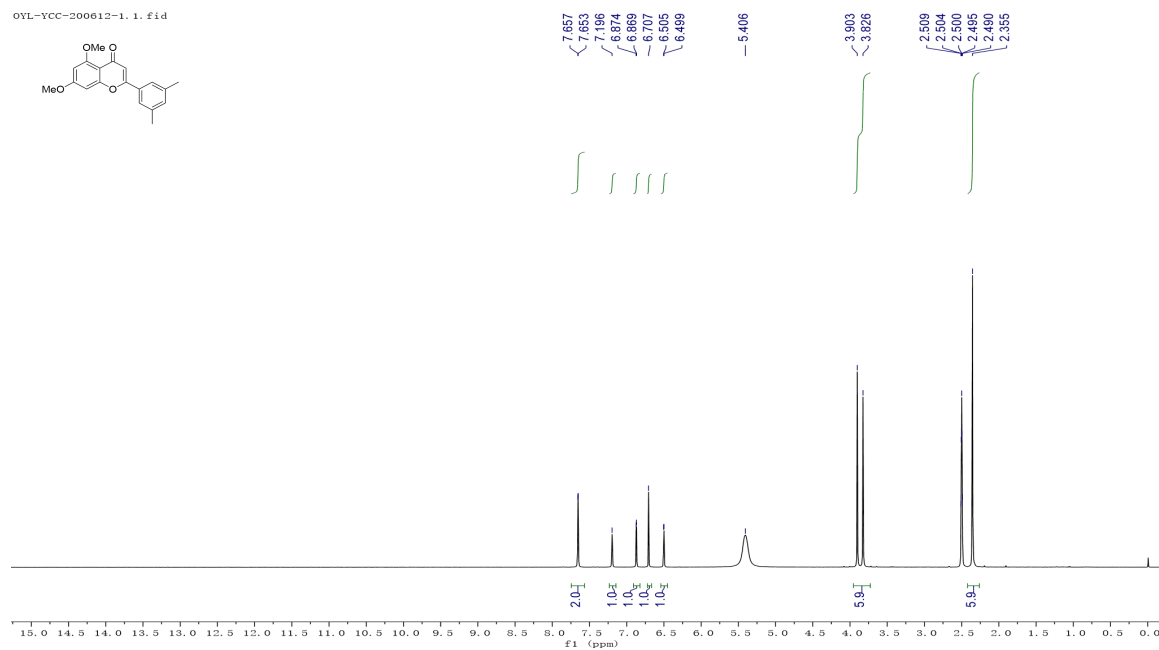

### <sup>1</sup>H NMR Spectrum of Compound 33a

0YL-YCC-200622-3C.1.fid

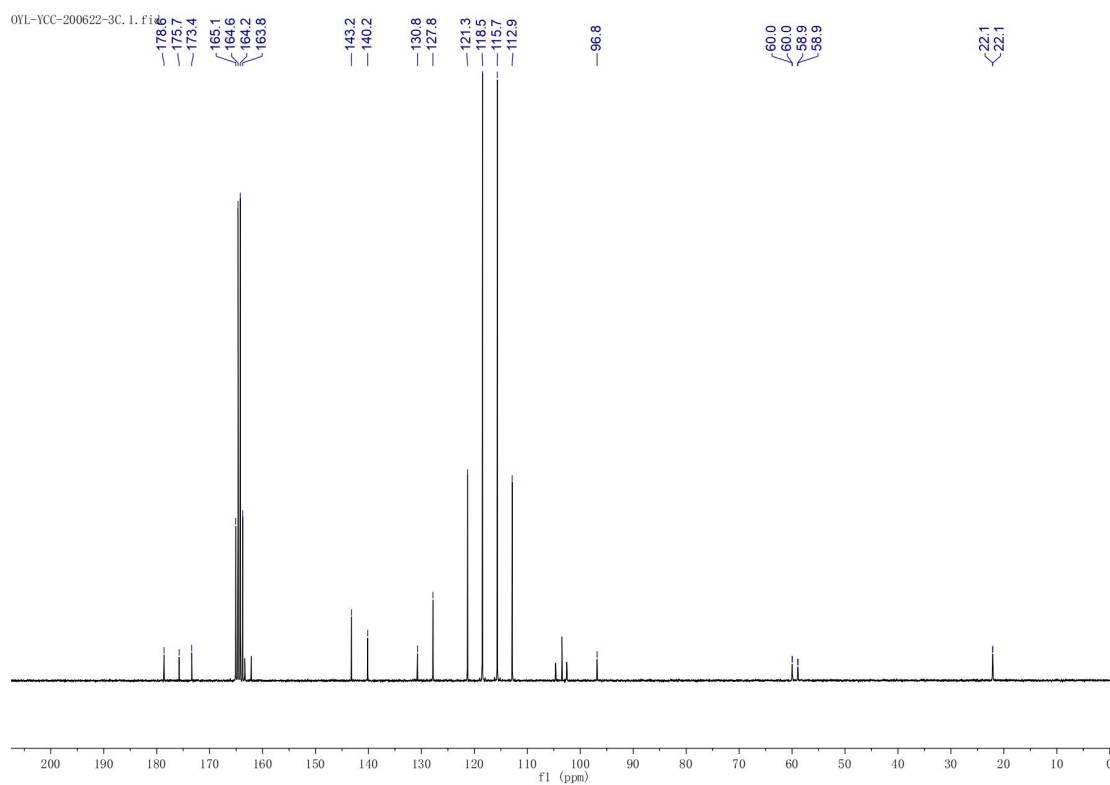

### <sup>13</sup>C NMR Spectrum of Compound 33a



33b

OVL-YCC-200703-4.1.fid

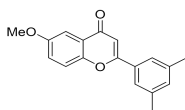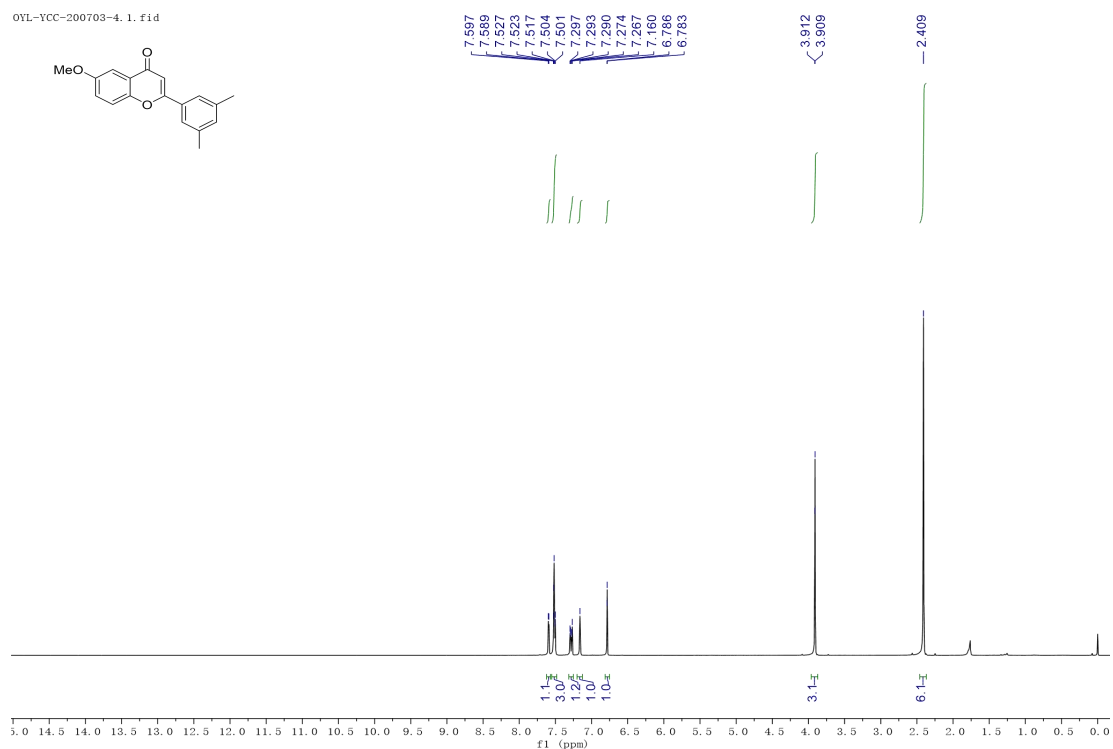

<sup>1</sup>H NMR Spectrum of Compound 33b

OVL-YCC-200703-4C.1.fid

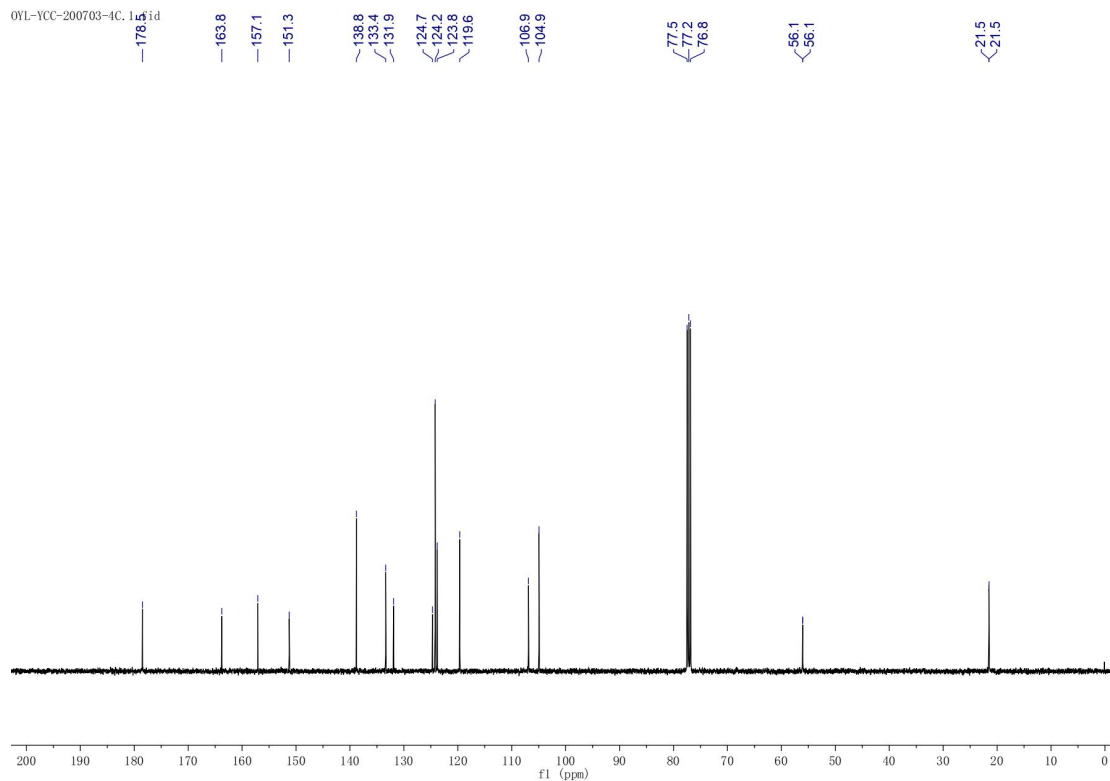

<sup>13</sup>C NMR Spectrum of Compound 33b

33c

OVL-YCC-200608-1.1.f1d

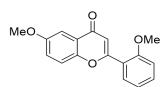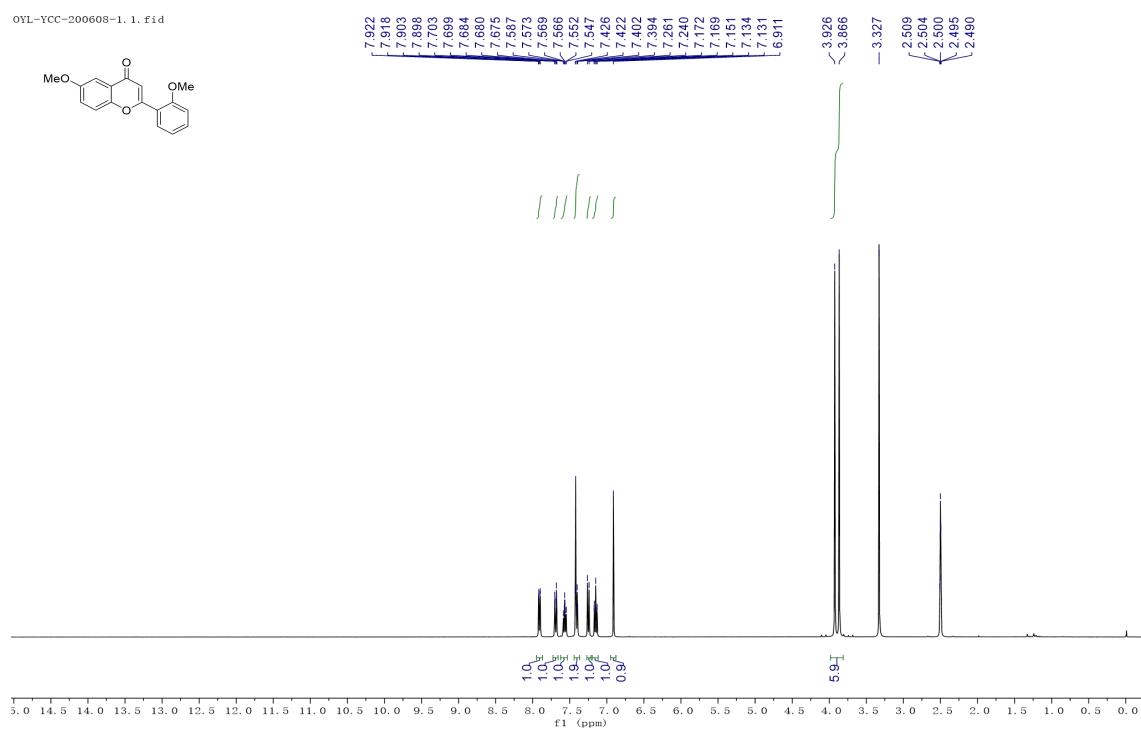

<sup>1</sup>H NMR Spectrum of Compound 33c

OVL-CYX-200429-3C.1.f1d

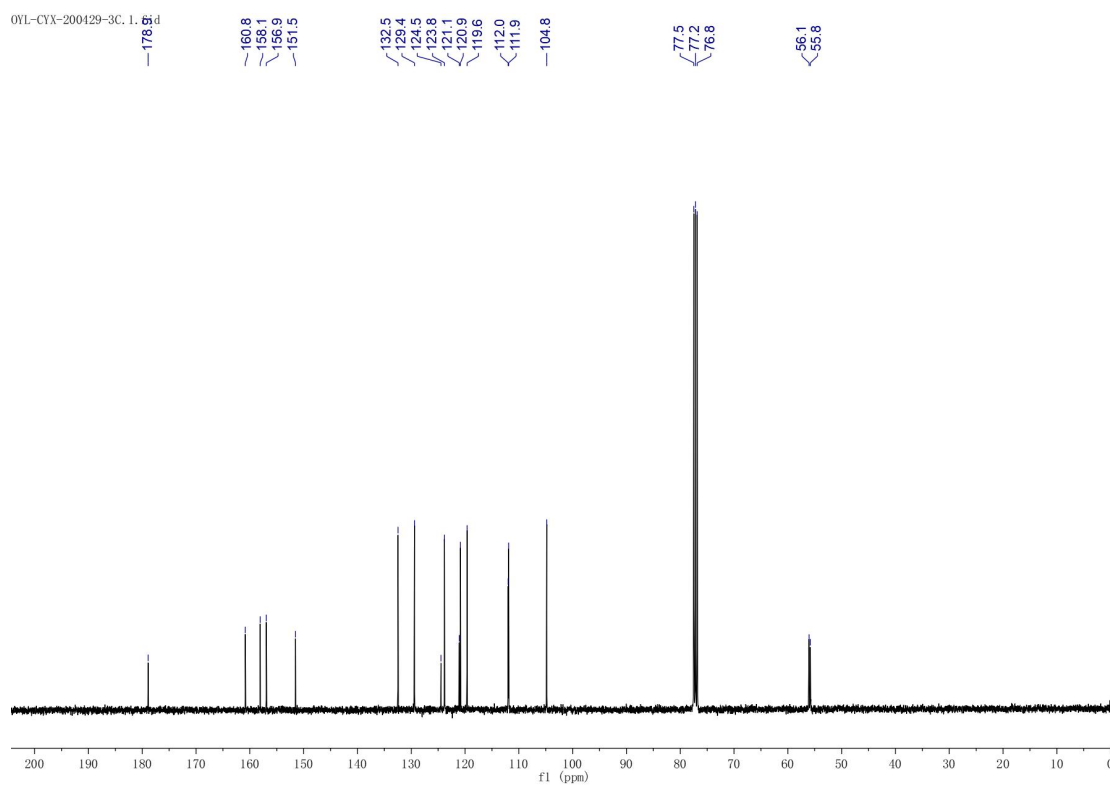

<sup>13</sup>C NMR Spectrum of Compound 33c

### 33d

OVL-YCC-200605-1. 1. f1d

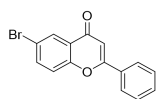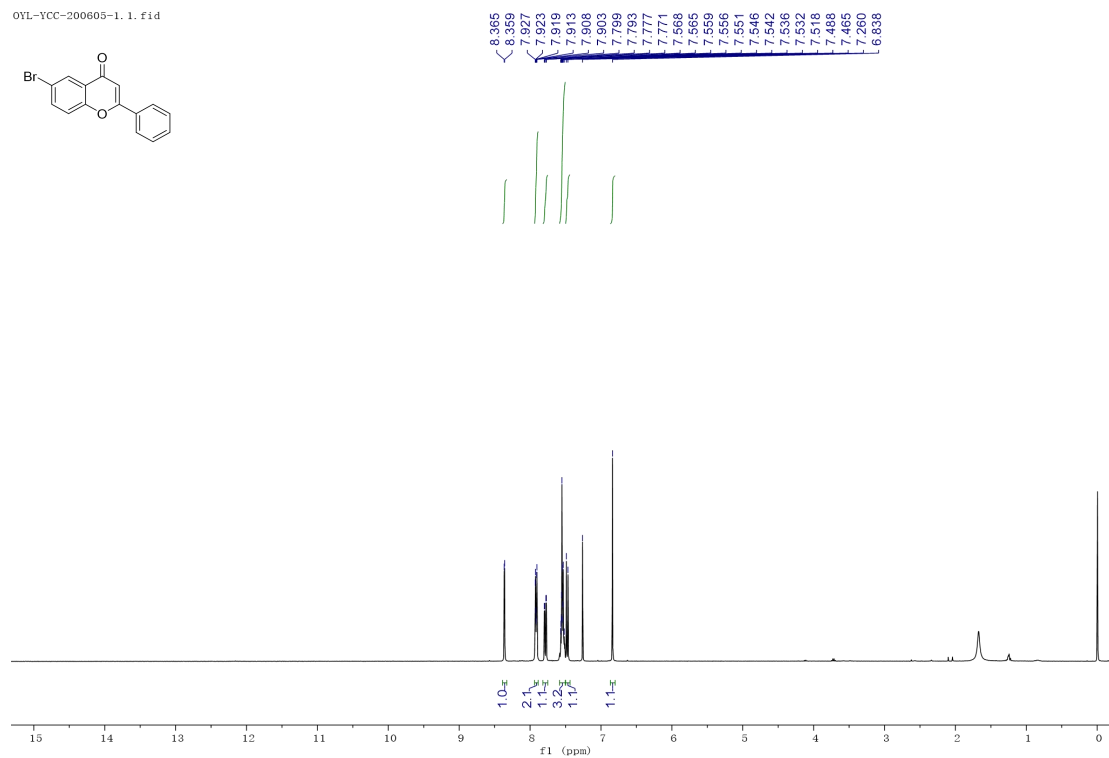

<sup>1</sup>H NMR Spectrum of Compound 33d

OVL-YCC-200605-1C. 1c.f1d

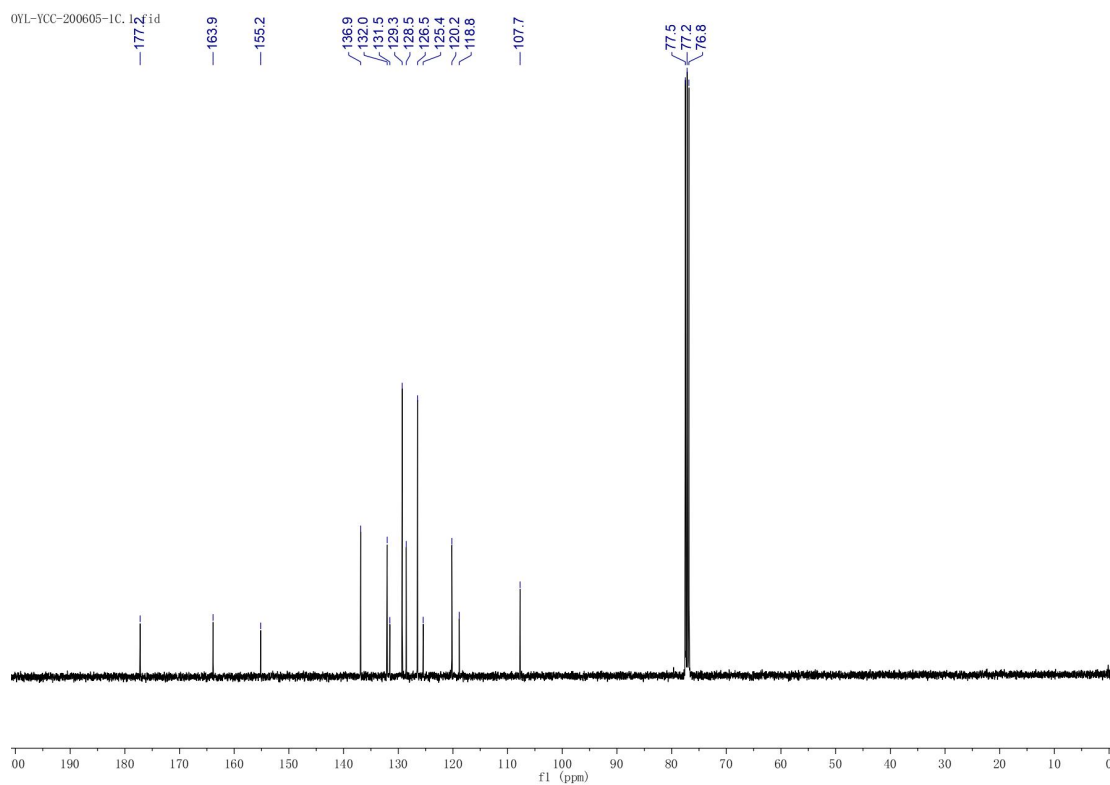

<sup>13</sup>C NMR Spectrum of Compound 33d

# 34a

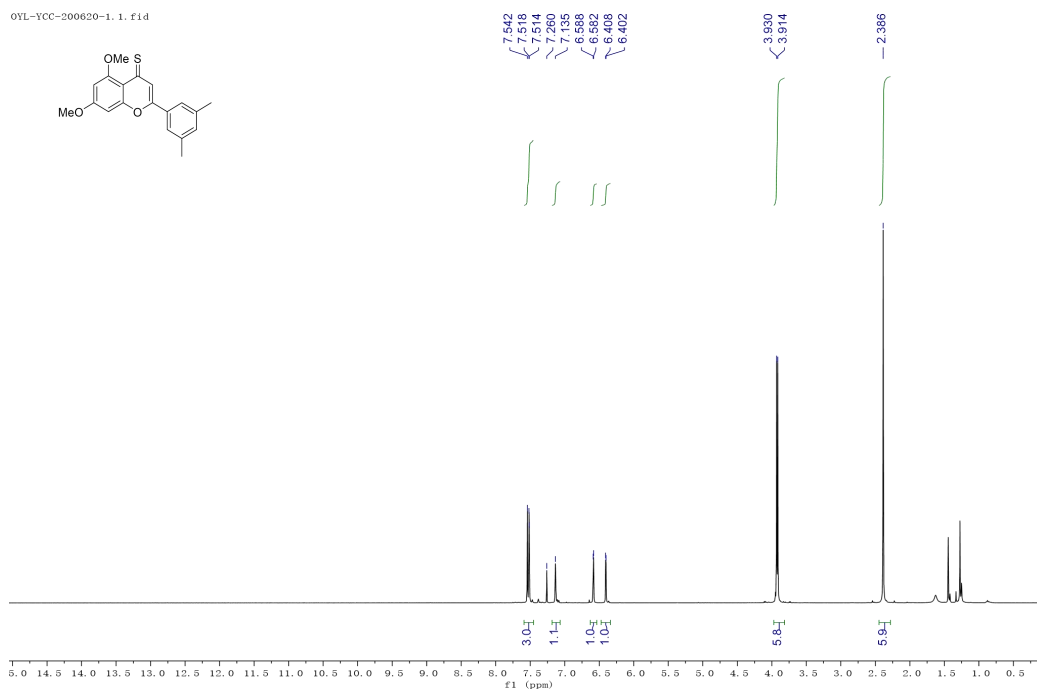

<sup>1</sup>H NMR Spectrum of Compound **34a**

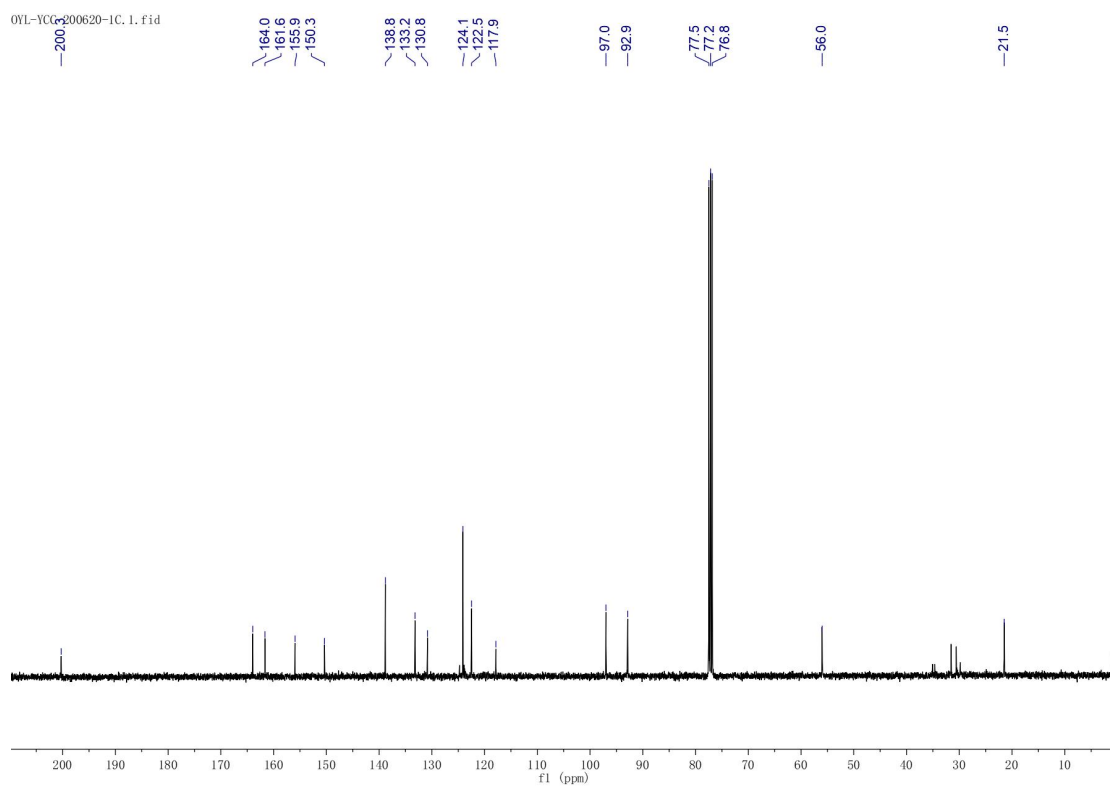

<sup>13</sup>C NMR Spectrum of Compound **34a**

# 34b

OVL-YCC-200713-2. 1. fid

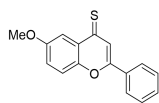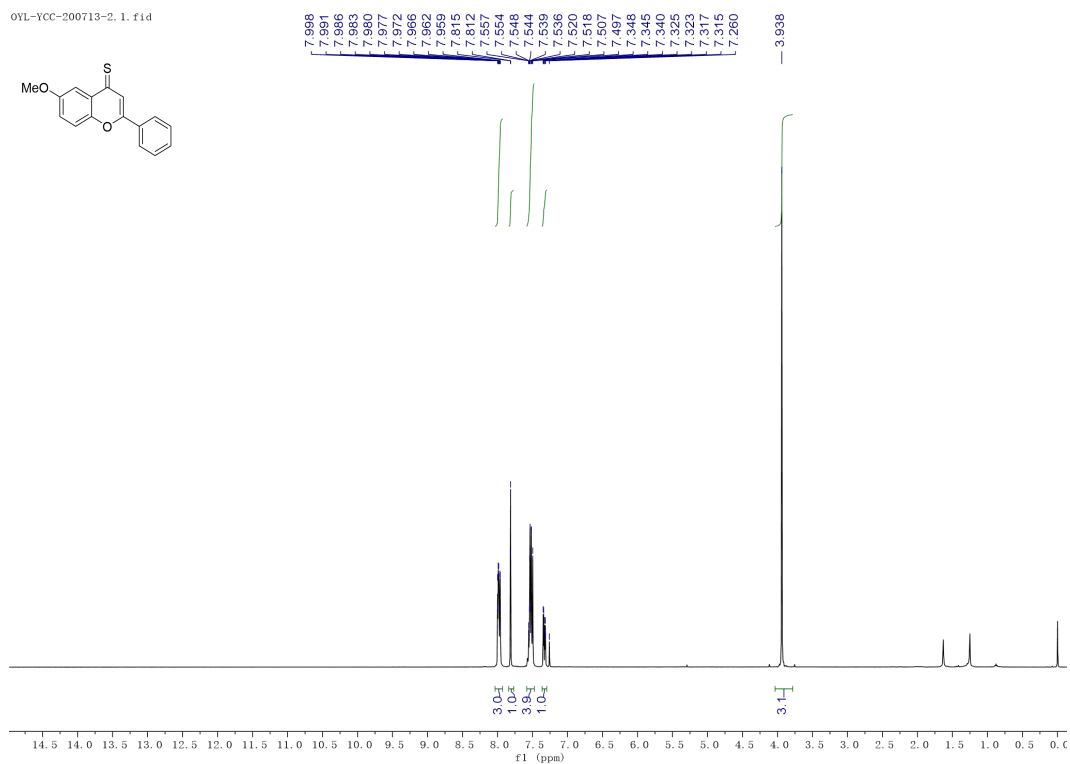

<sup>1</sup>H NMR Spectrum of Compound 34b

OVL-ZJF-200713-2C. 1. fid

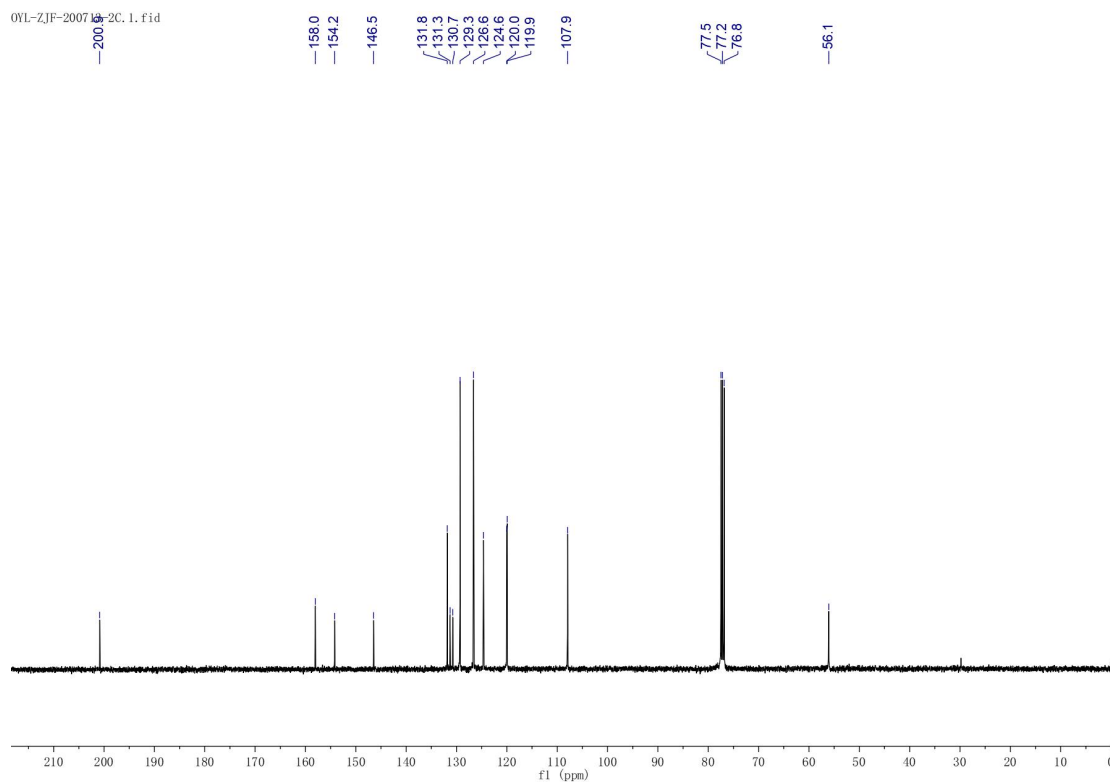

<sup>13</sup>C NMR Spectrum of Compound 34b

# 34c

OVL-YCC-200716-3.1.fid

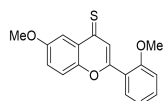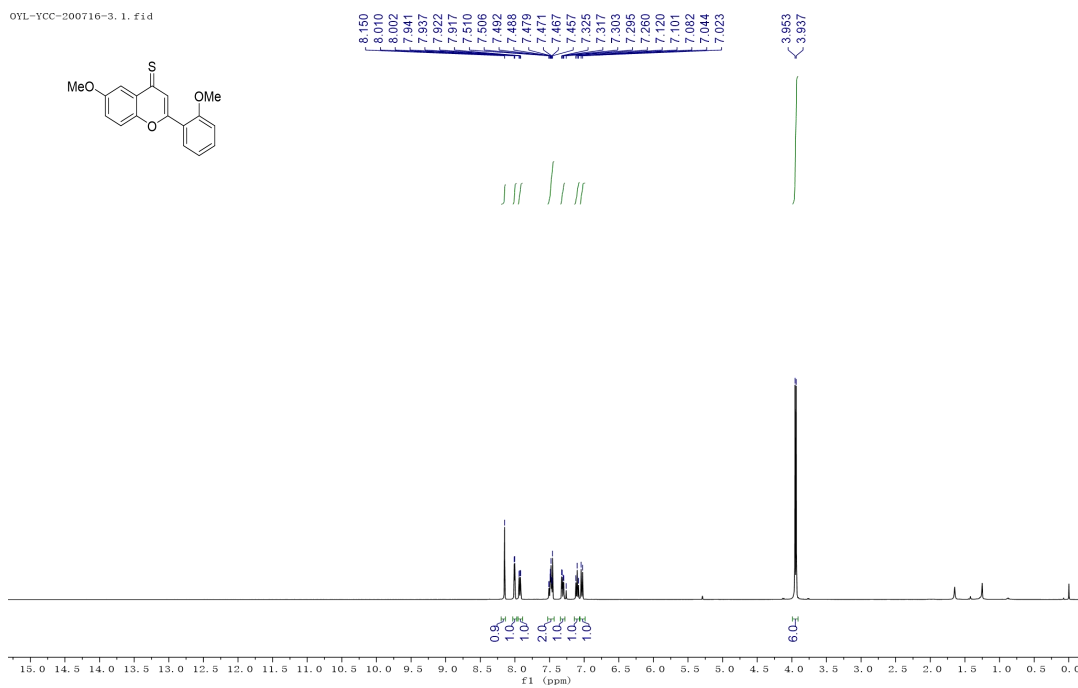

<sup>1</sup>H NMR Spectrum of Compound 34c

OVL-YCC-200716-3C.1.fid

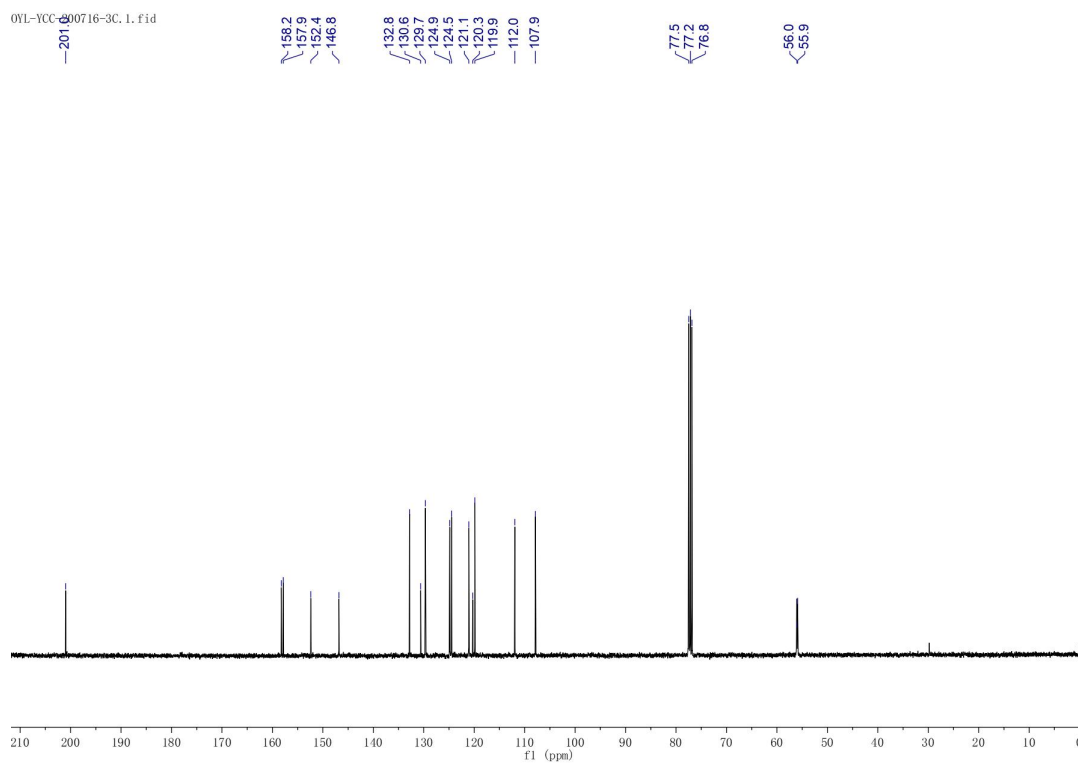

<sup>13</sup>C NMR Spectrum of Compound 34c

# 38a

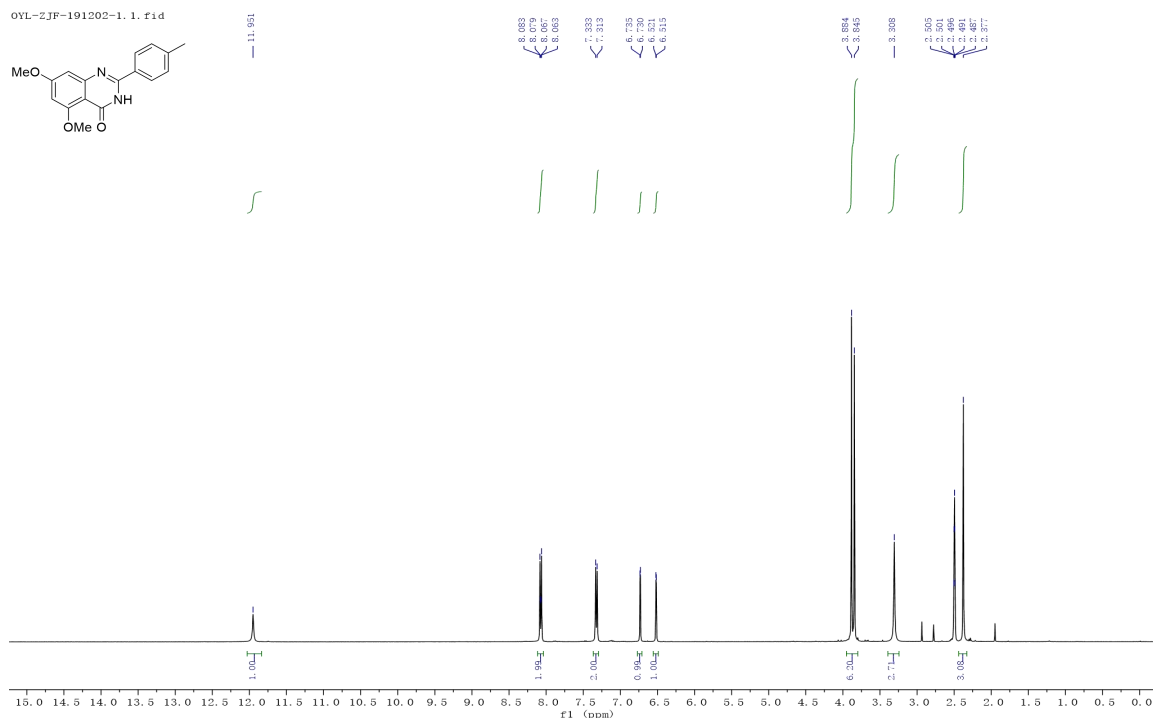

<sup>1</sup>H NMR Spectrum of Compound 38a

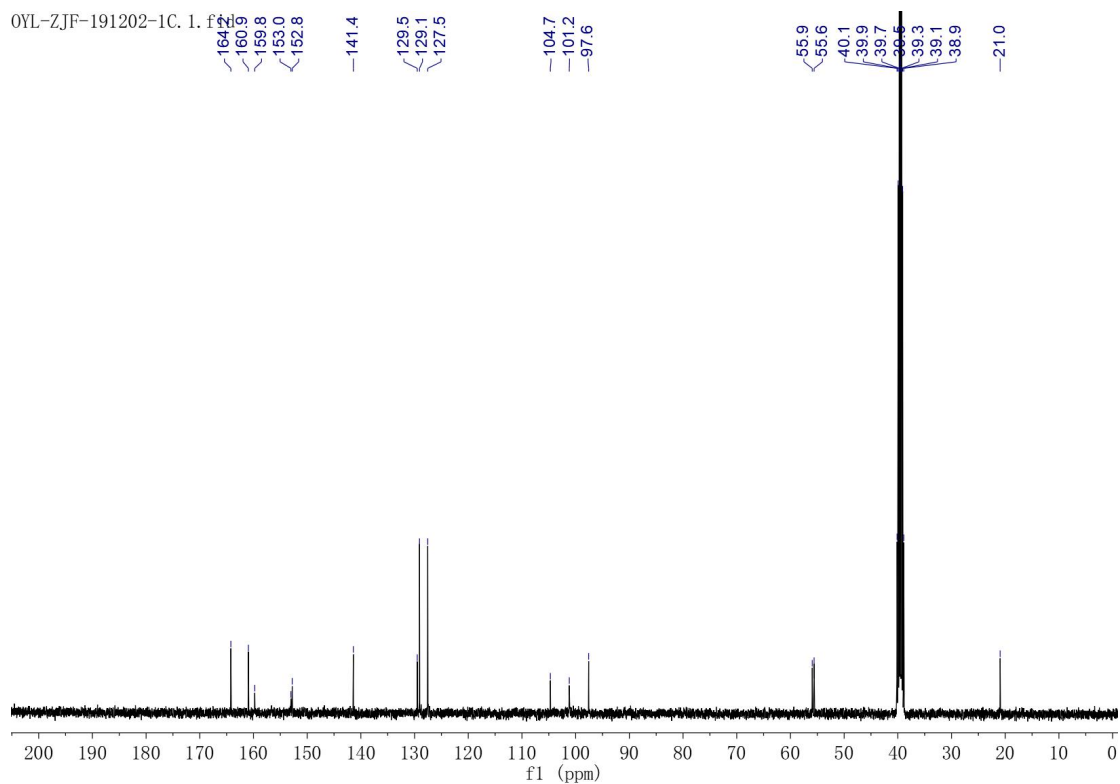

<sup>13</sup>C NMR Spectrum of Compound 38a

# 38b

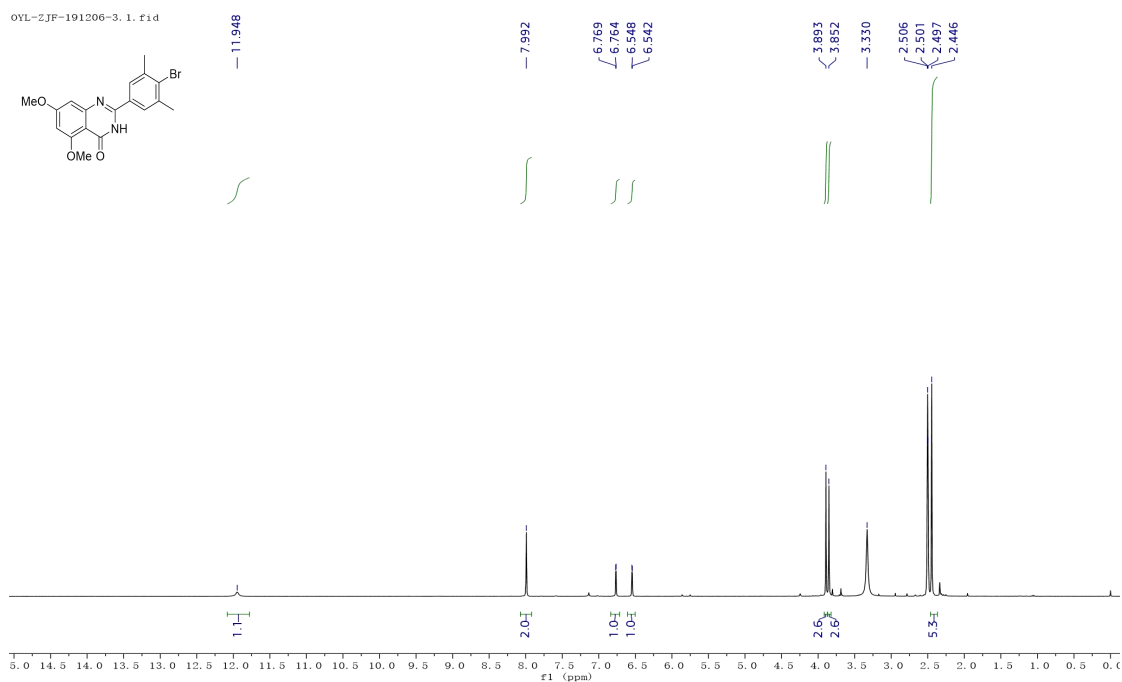

<sup>1</sup>H NMR Spectrum of Compound 38b

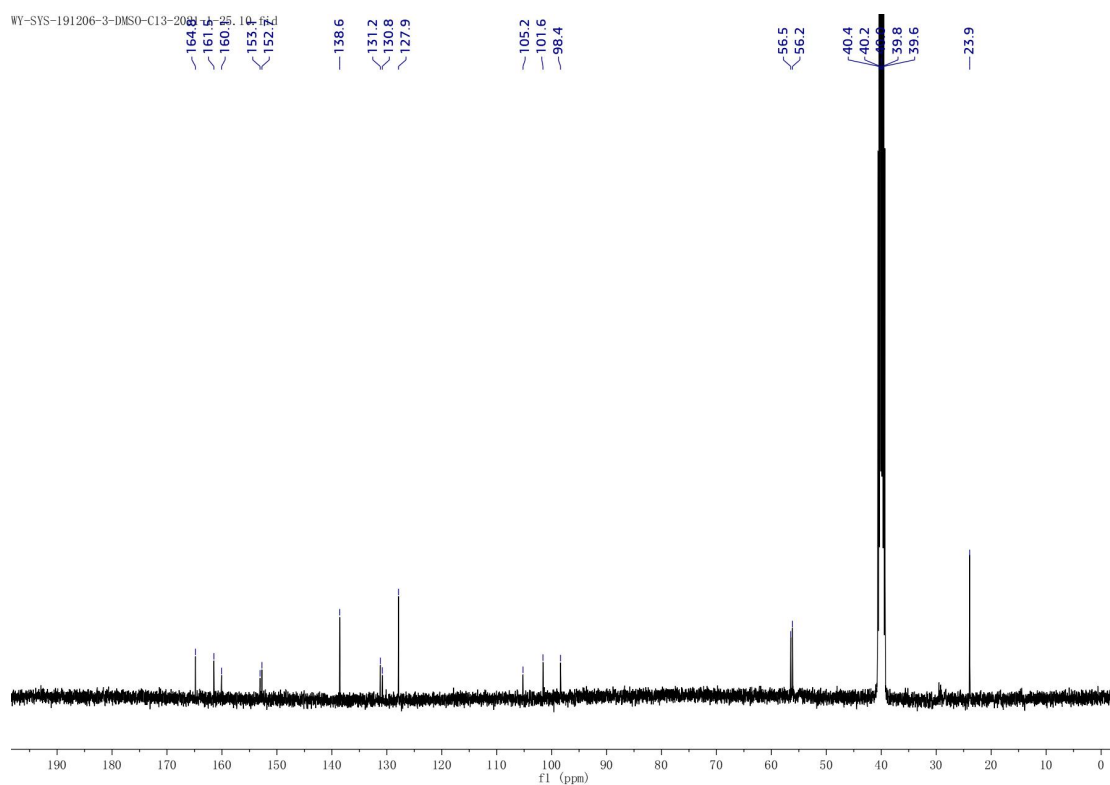

<sup>13</sup>C NMR Spectrum of Compound 38b



# 38c

OYL-ZJF-191209-1.1.fid

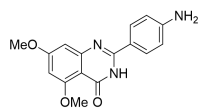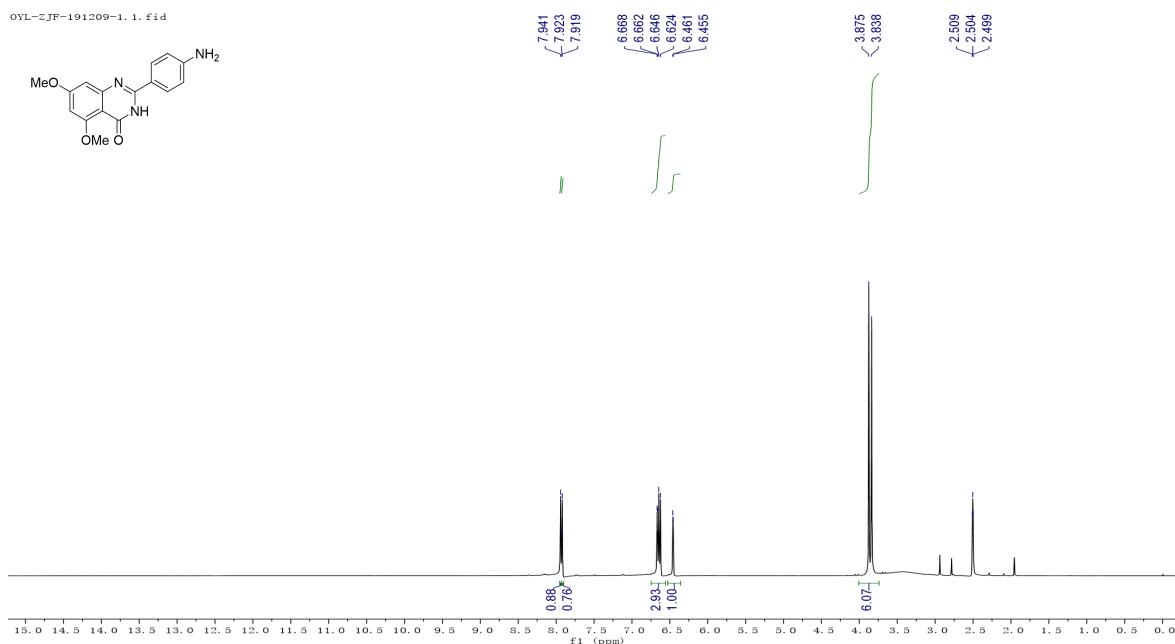

<sup>1</sup>H NMR Spectrum of Compound 38c

OYL-ZJF-191209-1.1.fid

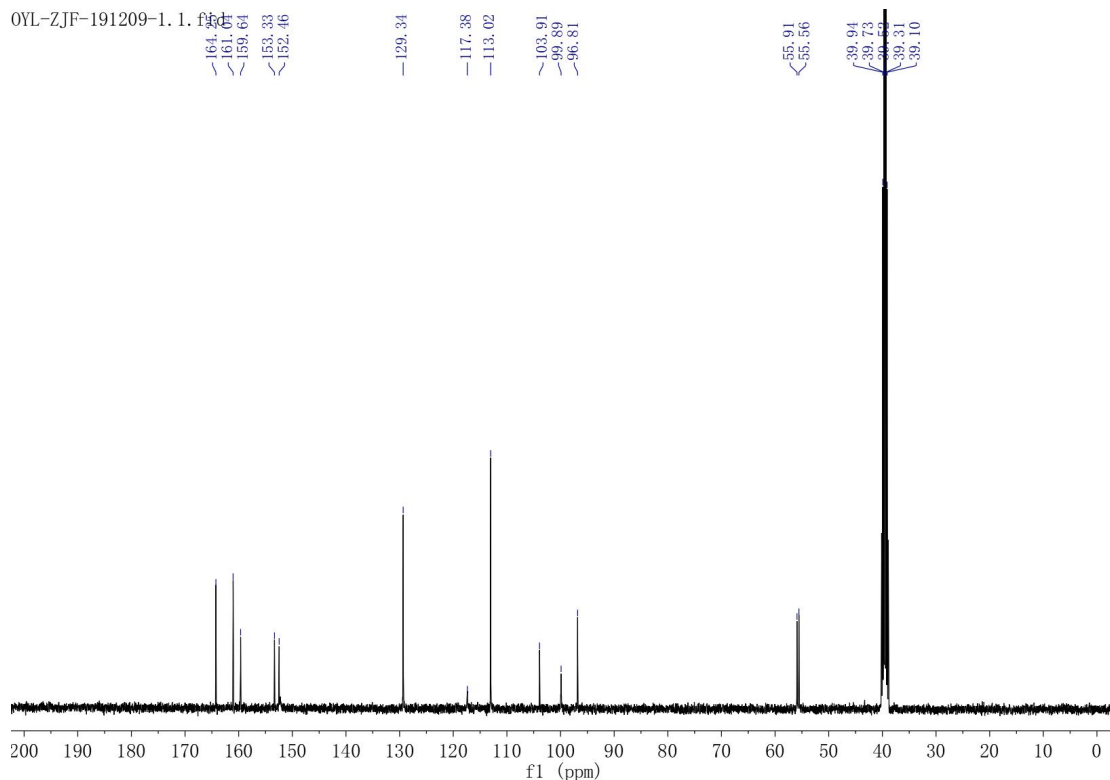

<sup>13</sup>C NMR Spectrum of Compound 38c

# 38d

OVL-CJC-191210-4H. 1. fid

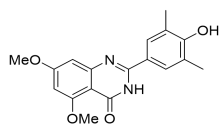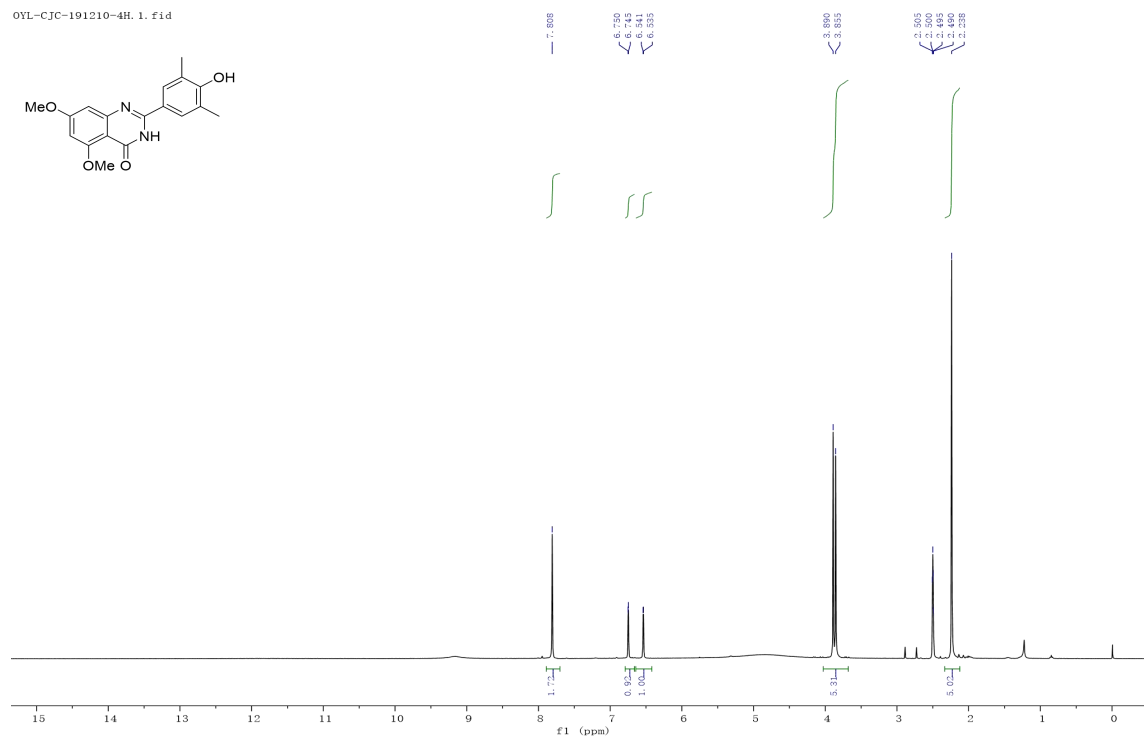

## <sup>1</sup>H NMR Spectrum of Compound 38d

OVL-CJC-191210-4C. 1.

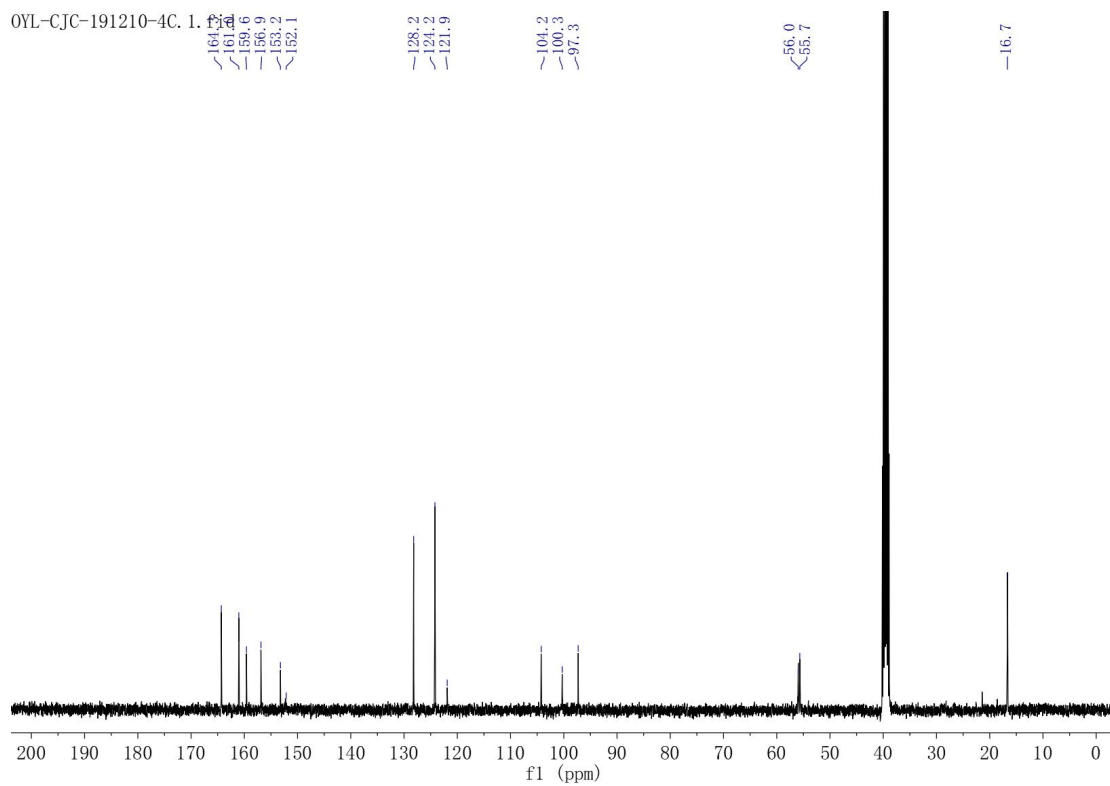

## <sup>13</sup>C NMR Spectrum of Compound 38d

### 38e

OVL-CJC-191210-2H. 1. f1.d

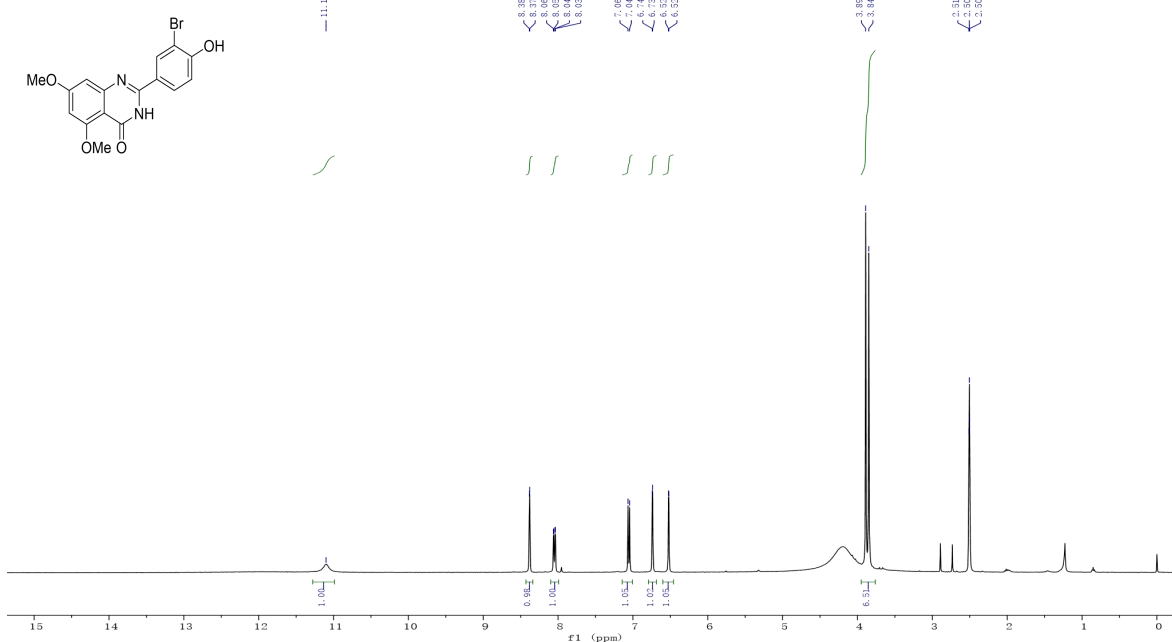

<sup>1</sup>H NMR Spectrum of Compound 38e

OVL-CJC-191210-2C. 2. f1.d

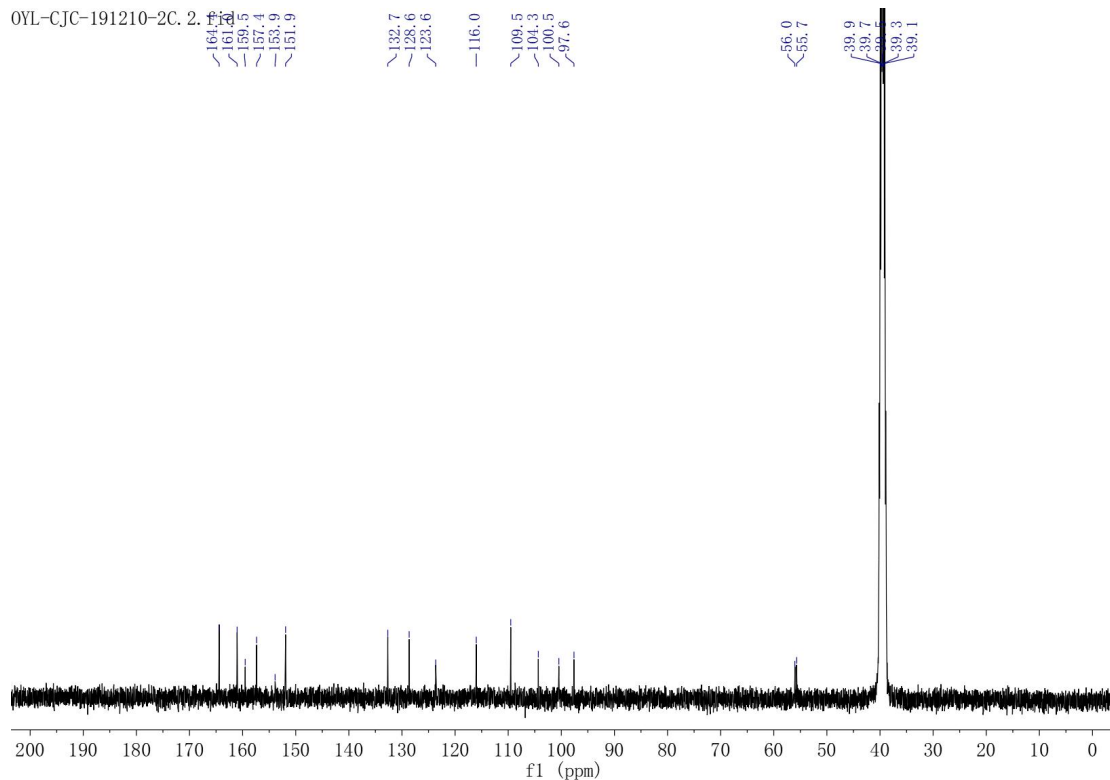

<sup>13</sup>C NMR Spectrum of Compound 38e

# 38f

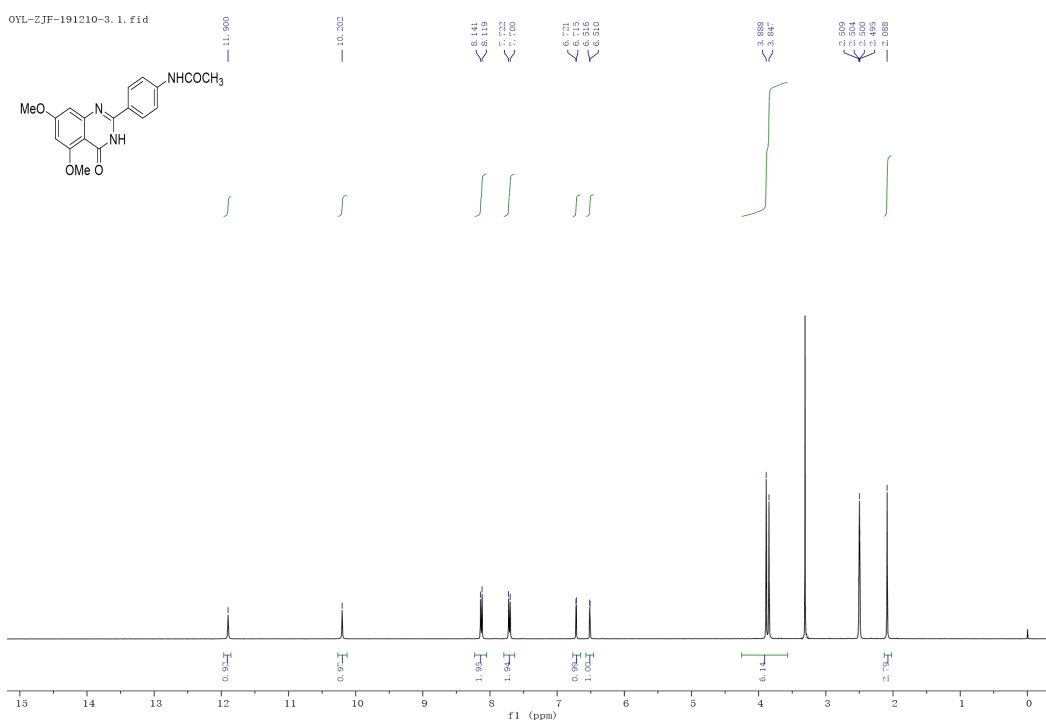

<sup>1</sup>H NMR Spectrum of Compound 38f

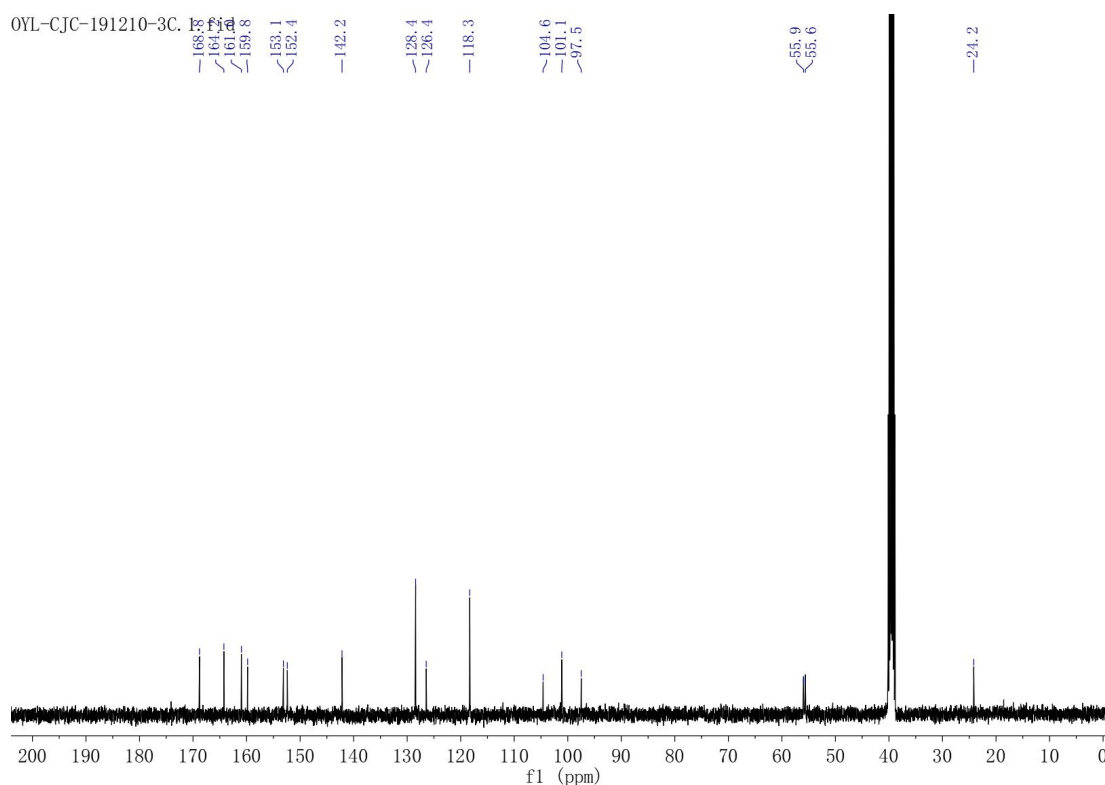

<sup>13</sup>C NMR Spectrum of Compound 38f

# 38g

OYL-ZJF-191211-1.1.fid

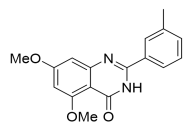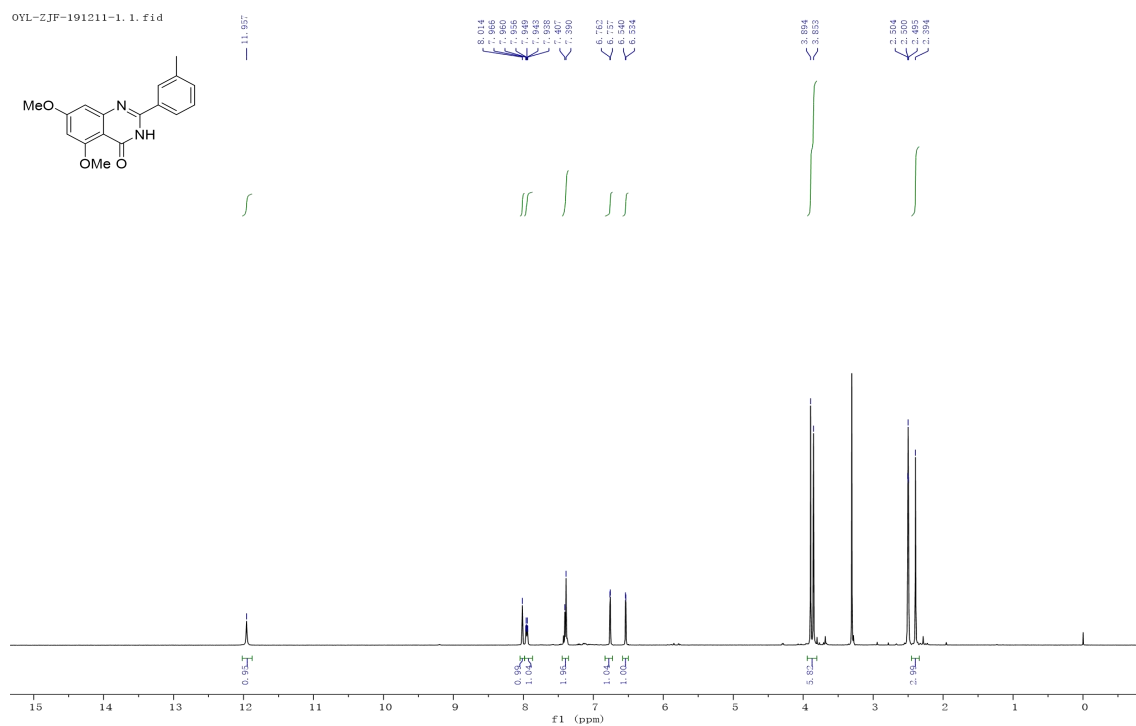

<sup>1</sup>H NMR Spectrum of Compound 38g

OYL-CJC-191211-1C.1.fid

166.4  
162.1  
157.4  
157.4

143.8  
138.9  
135.0  
130.0  
129.2  
126.9  
126.7

103.4  
99.0  
96.1

56.7  
56.3

39.9  
39.7  
39.5  
39.3  
39.1

20.9

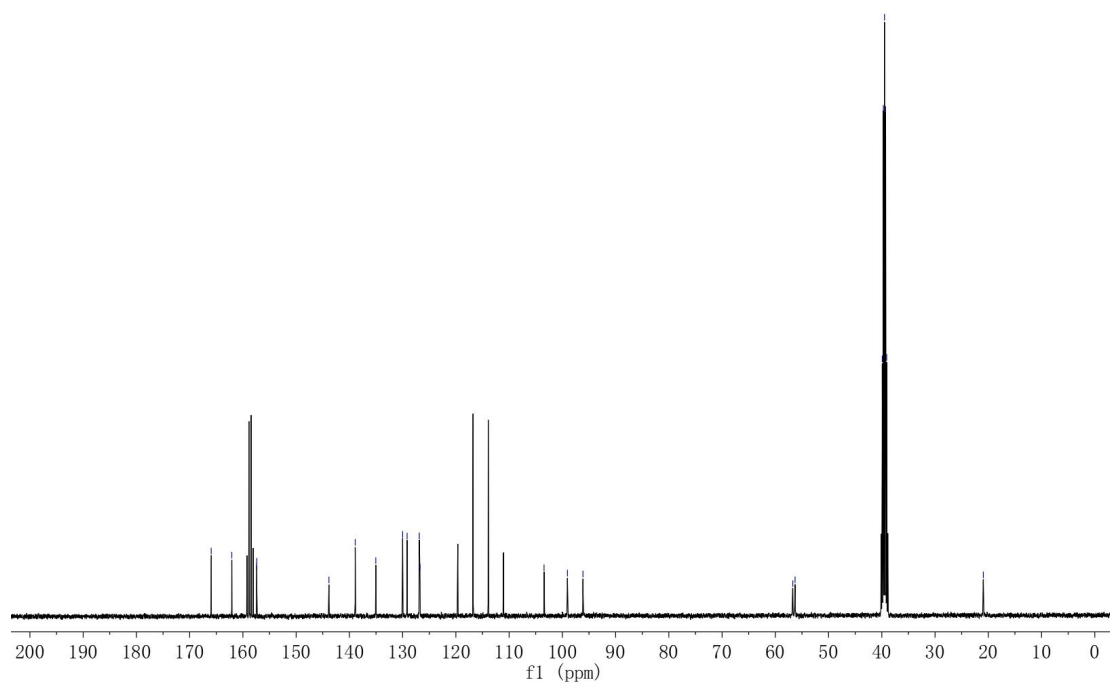

<sup>13</sup>C NMR Spectrum of Compound 38g

# 38h

OVL-ZJF-191218-2.1.fid

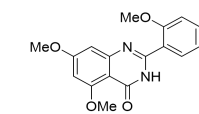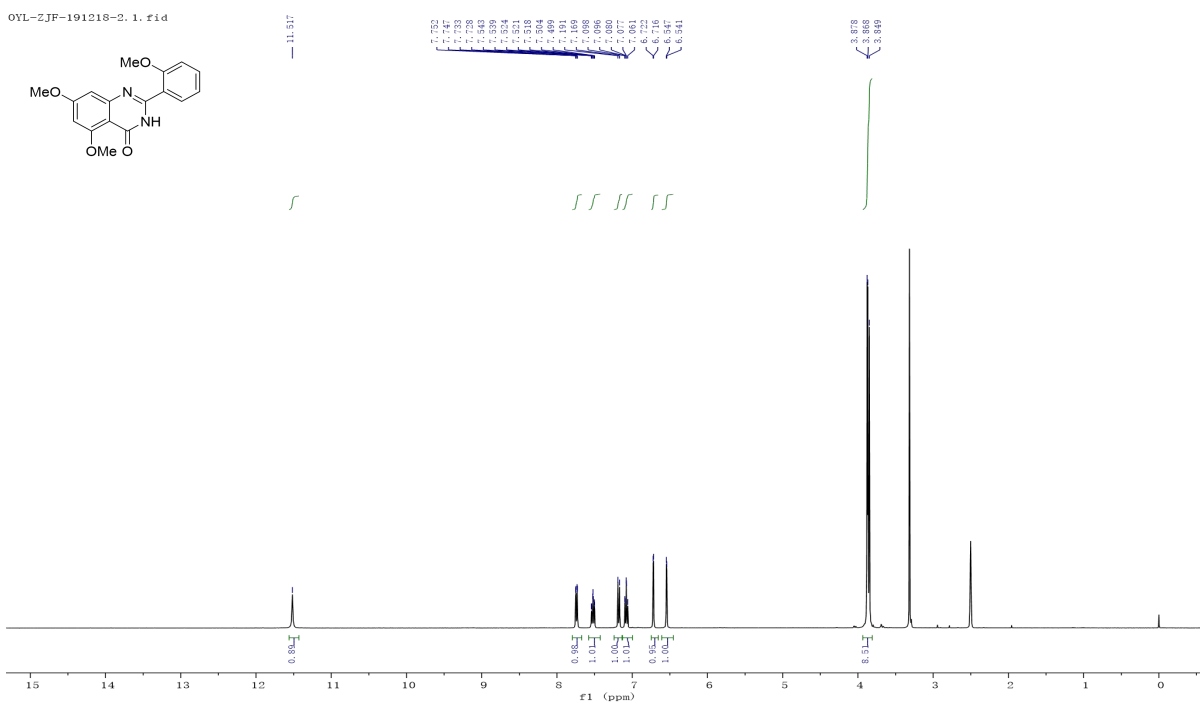

### <sup>1</sup>H NMR Spectrum of Compound 38h

OVL-CJC-191218-2C.1.

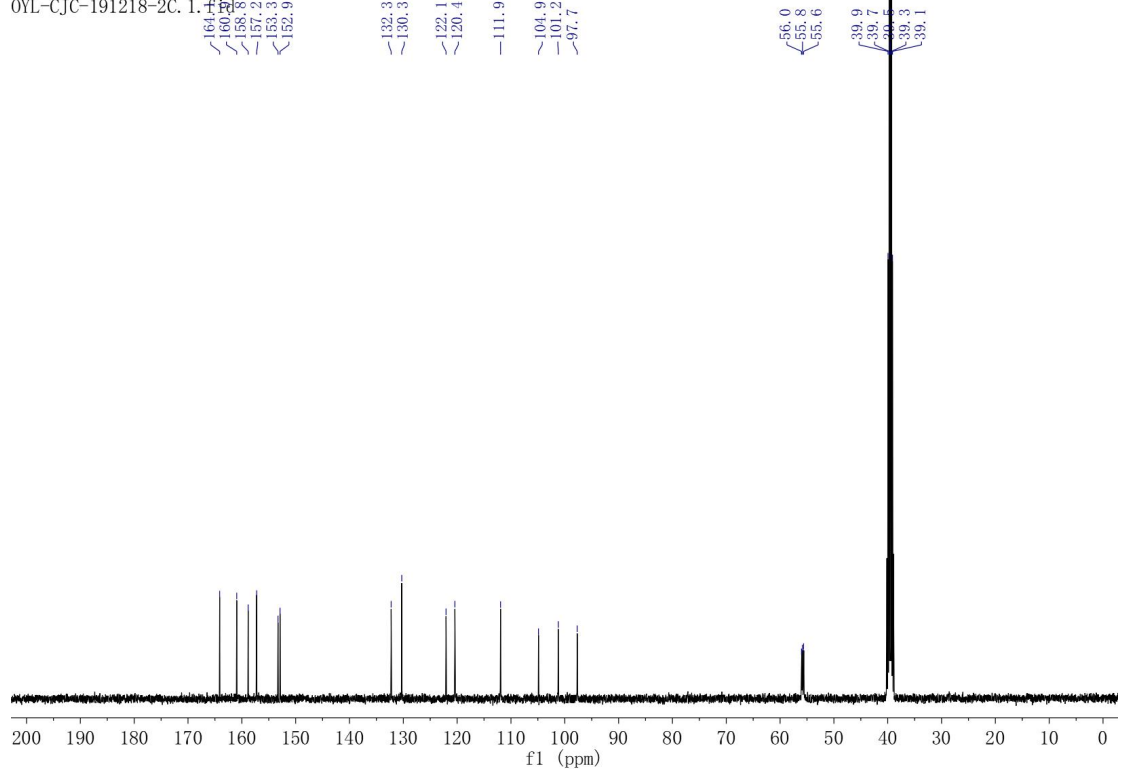

### <sup>13</sup>C NMR Spectrum of Compound 38h

38i

OYL-ZJF-191218-3. 1. f1.d

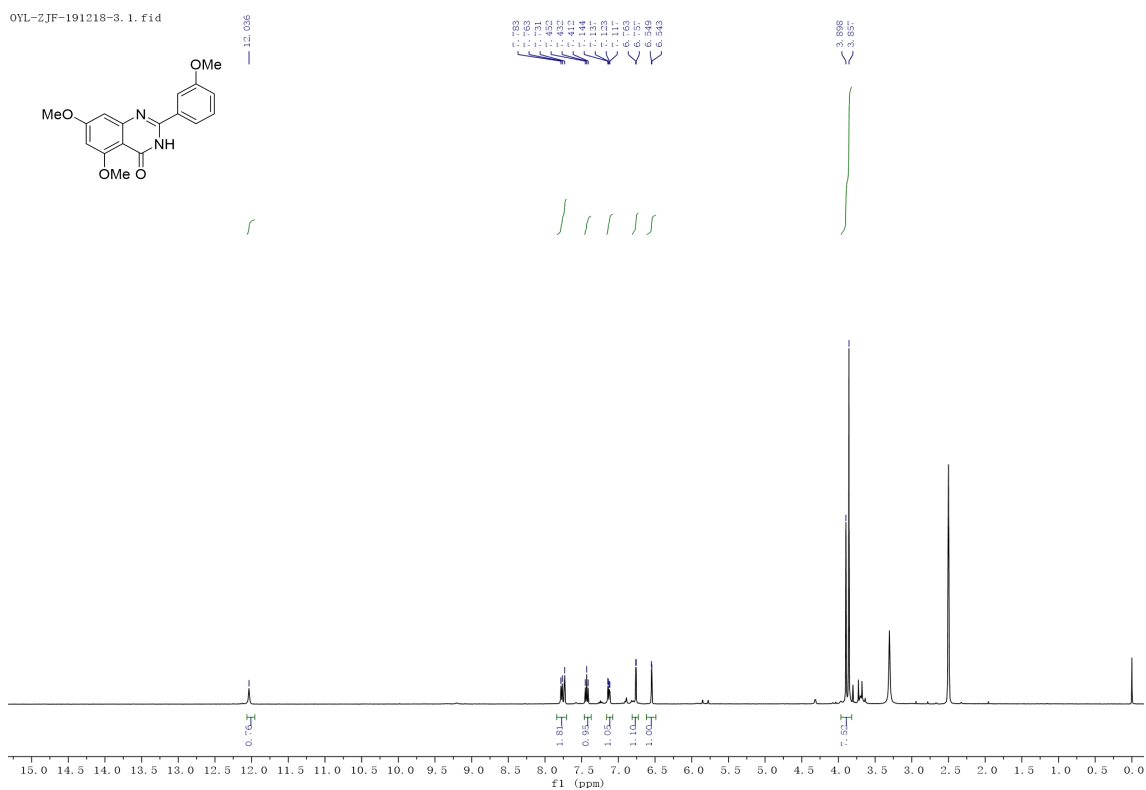

<sup>1</sup>H NMR Spectrum of Compound 38i

OYL-CJC-191218-3C. 1. d

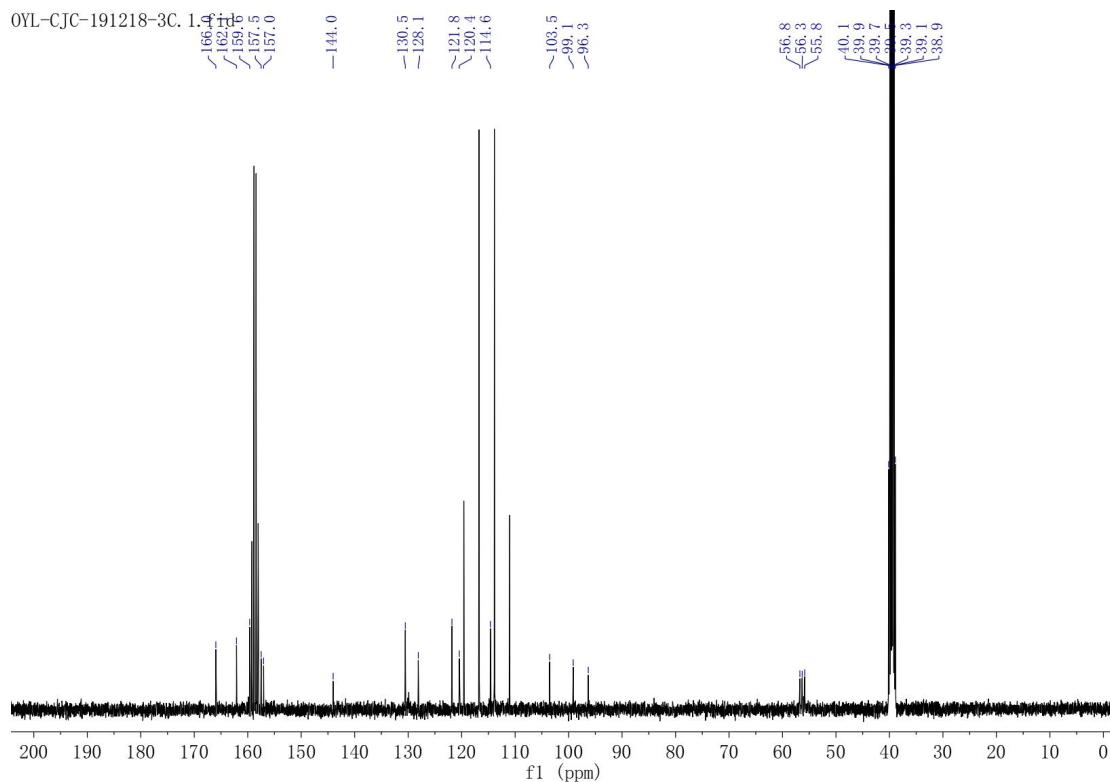

<sup>13</sup>C NMR Spectrum of Compound 38i

38j

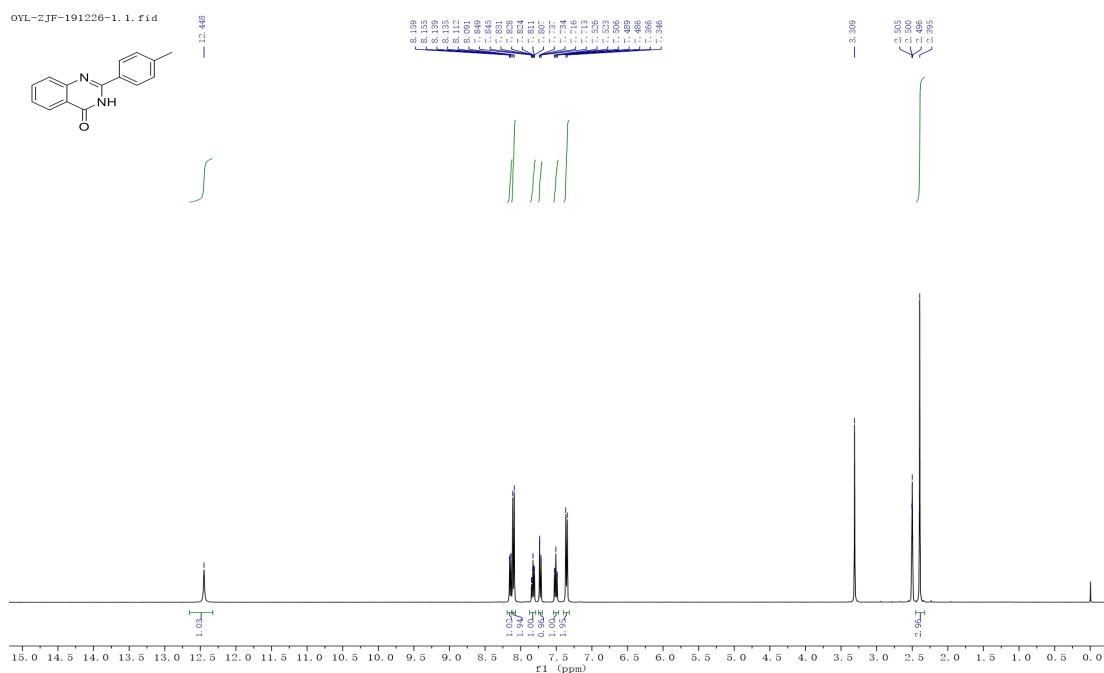

<sup>1</sup>H NMR Spectrum of Compound 38j

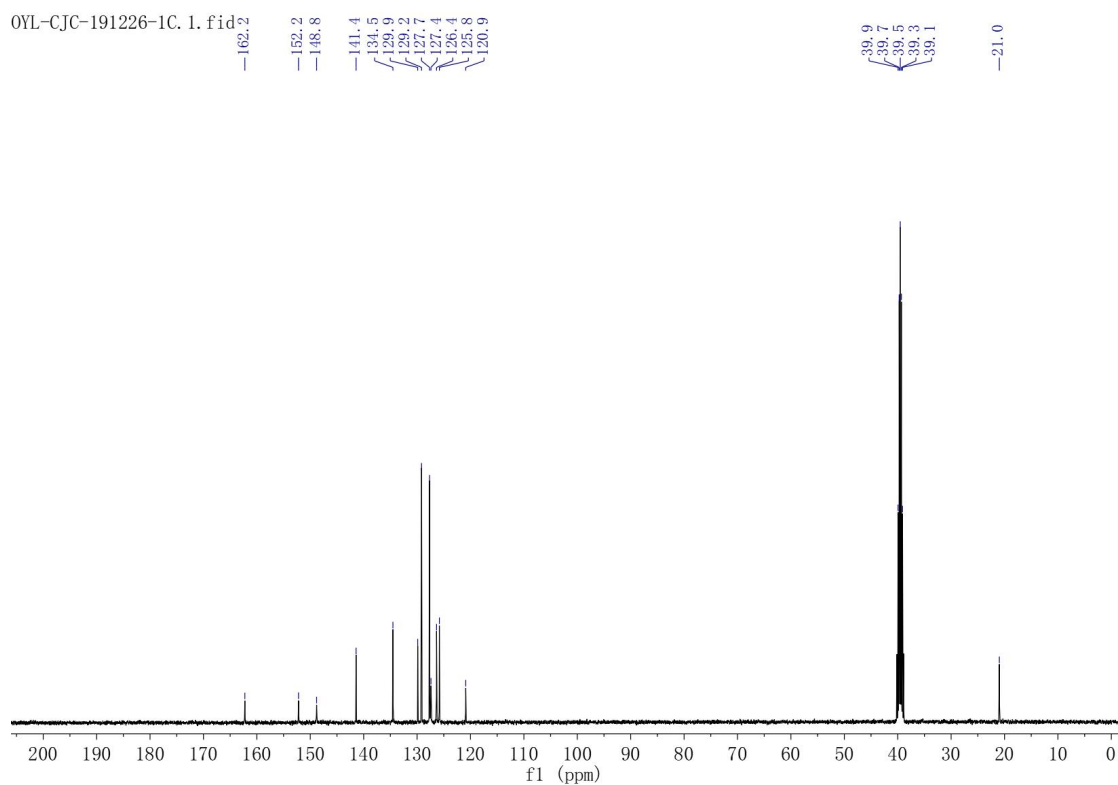

<sup>13</sup>C NMR Spectrum of Compound 38j



38k

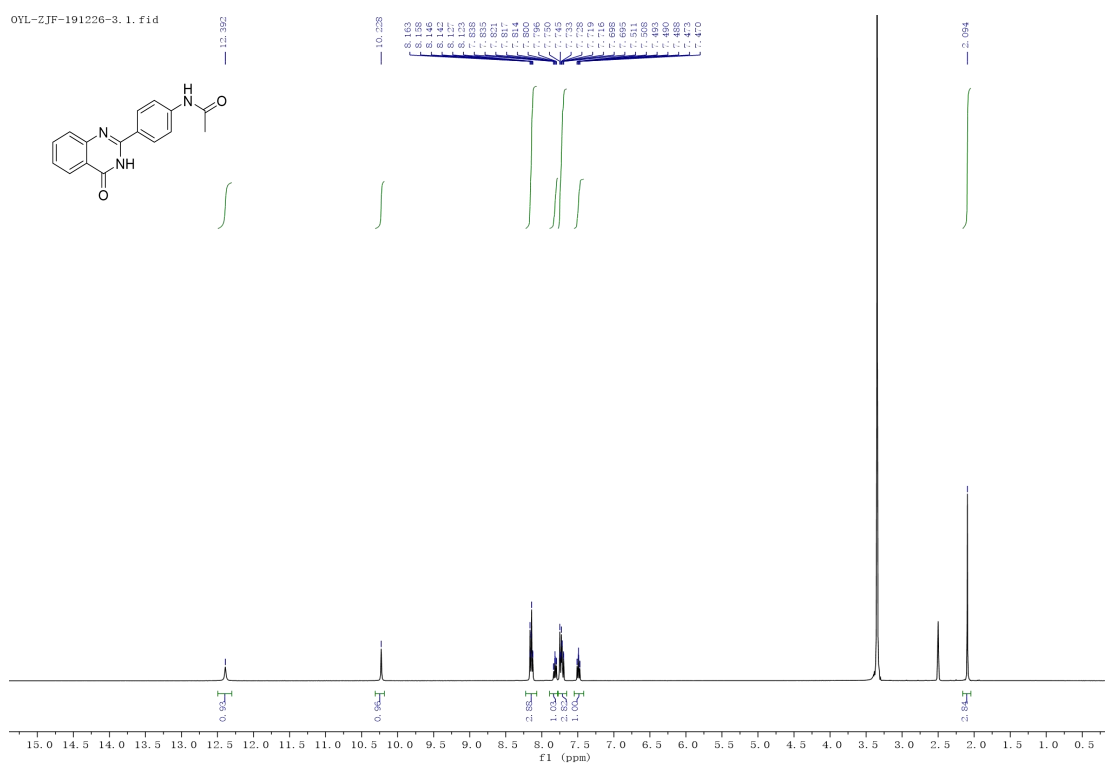

<sup>1</sup>H NMR Spectrum of Compound 38k

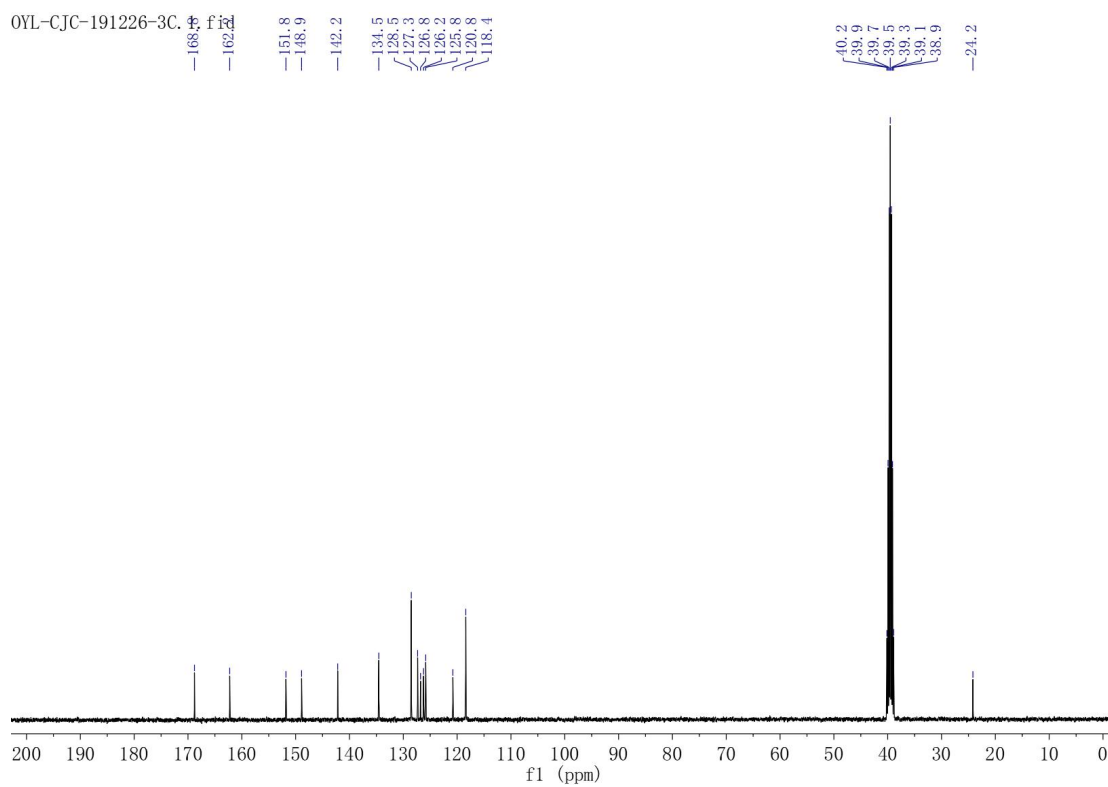

<sup>13</sup>C NMR Spectrum of Compound 38k

381

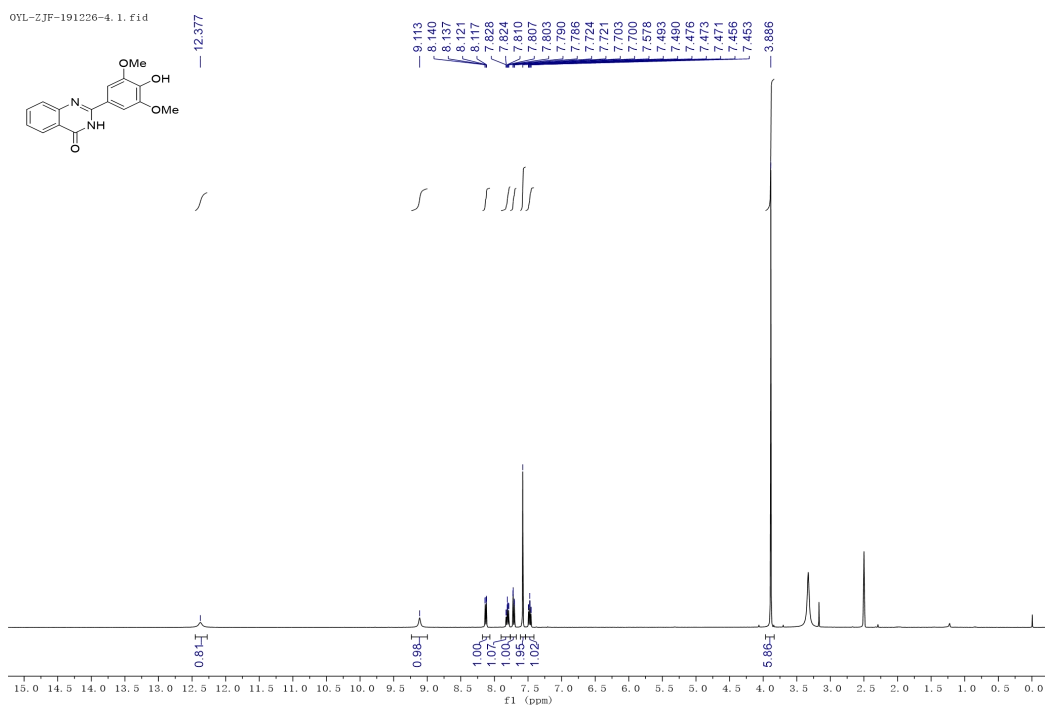

<sup>1</sup>H NMR Spectrum of Compound 381

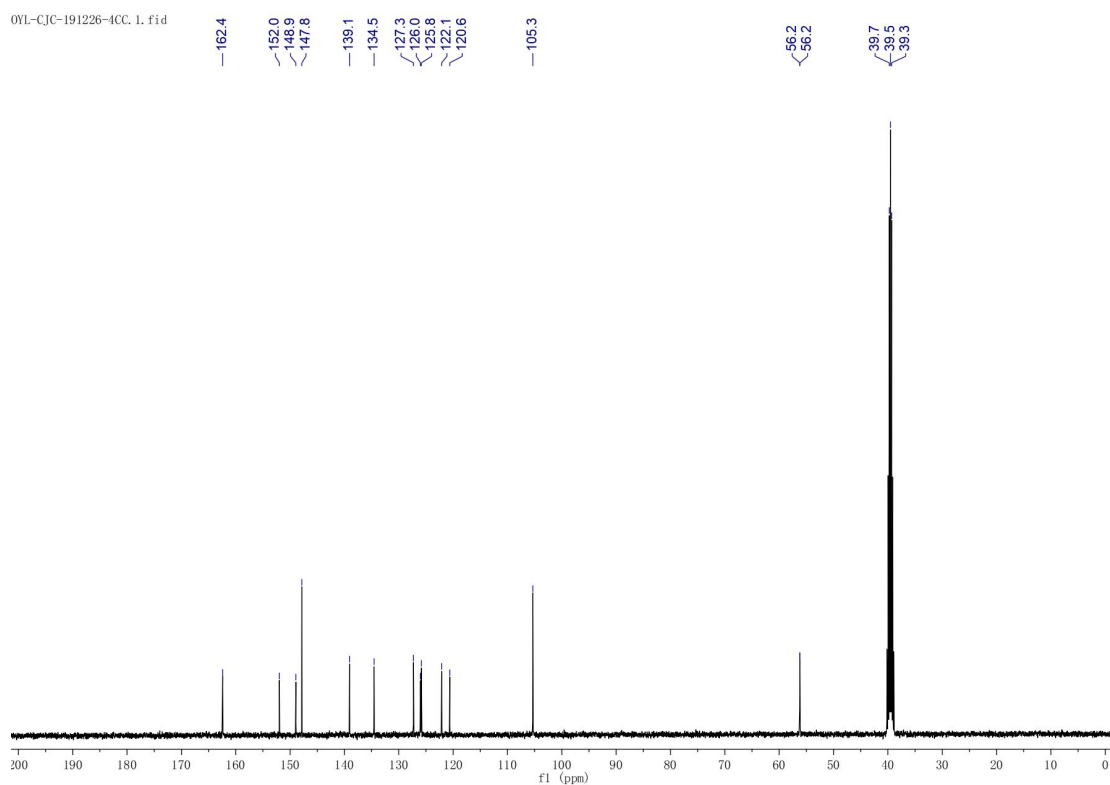

<sup>13</sup>C NMR Spectrum of Compound 381

# 38m

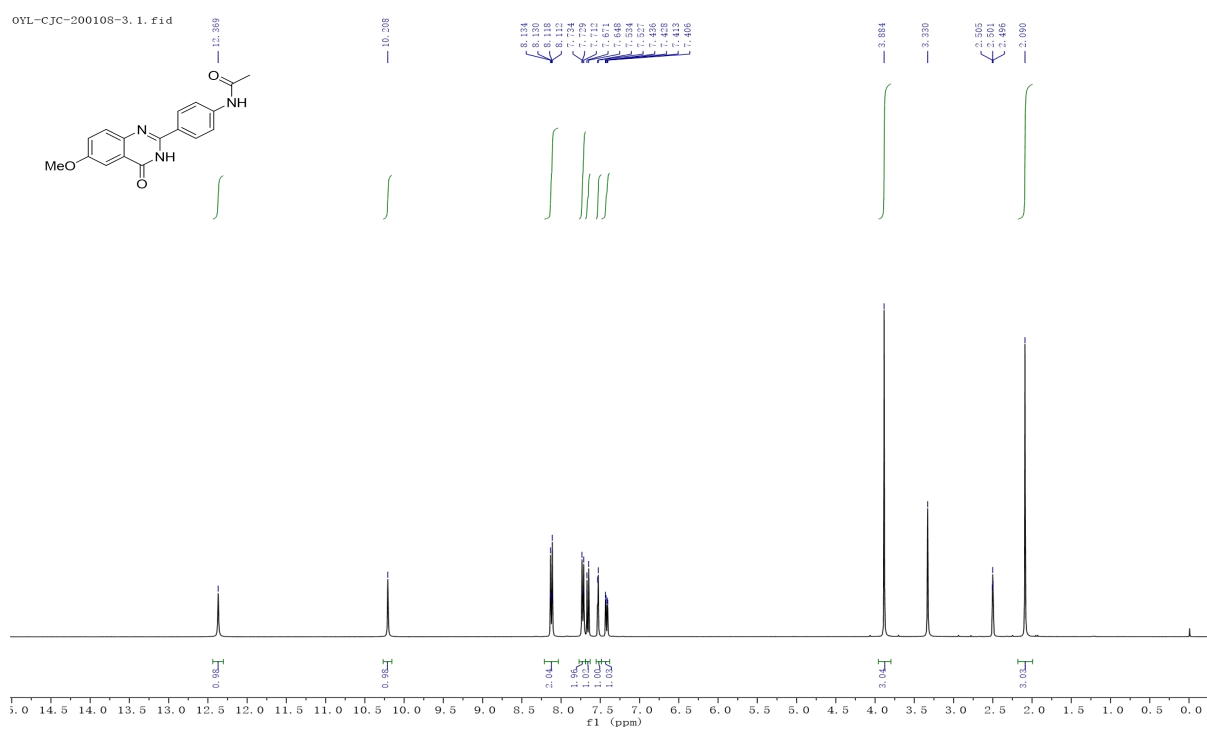

## <sup>1</sup>H NMR Spectrum of Compound 38m

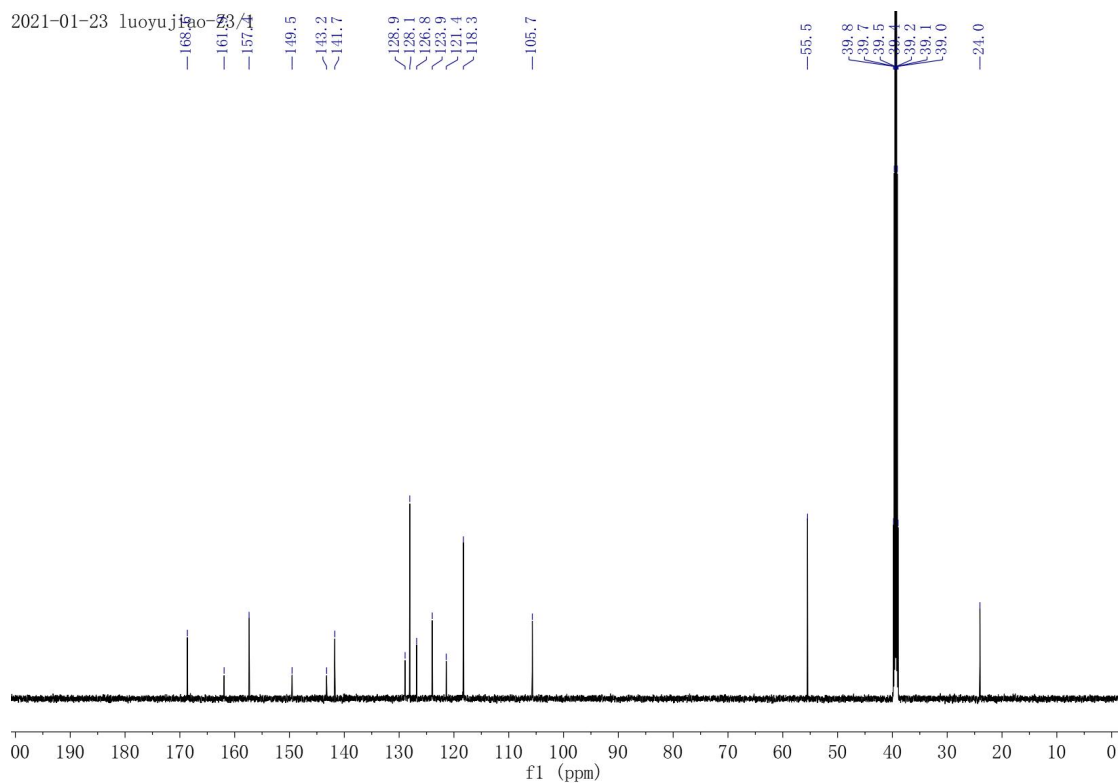

## <sup>13</sup>C NMR Spectrum of Compound 38m

# 38n

OYL-ZJF-200108-4.1.fid

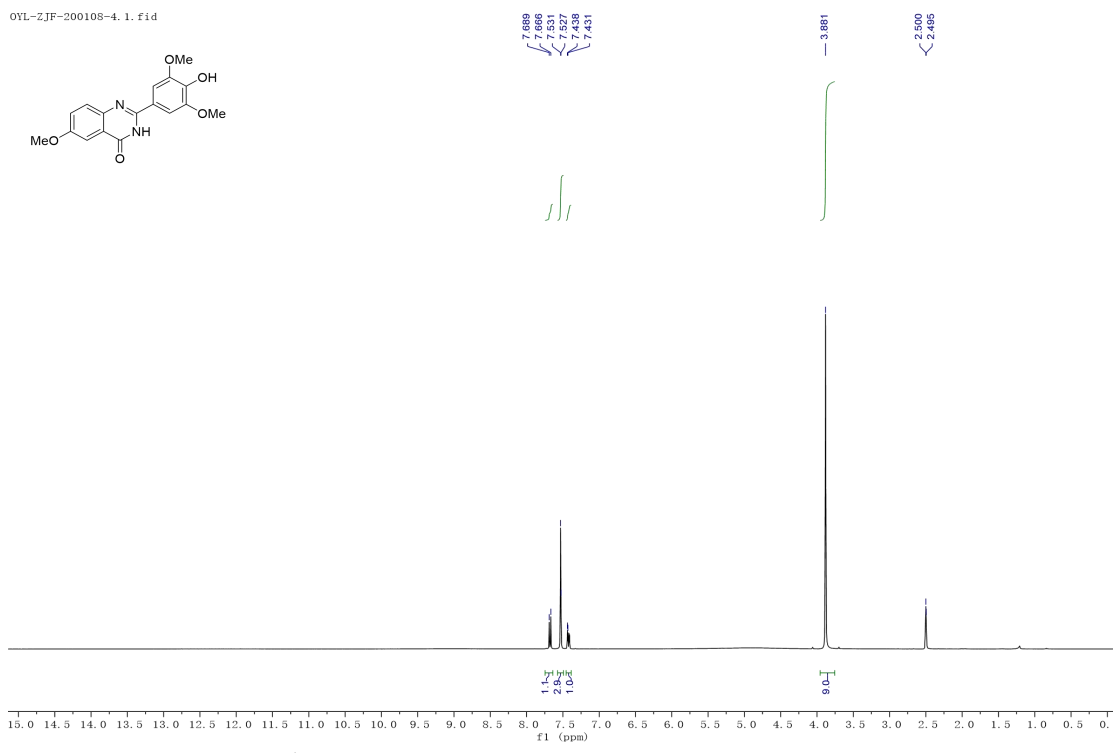

<sup>1</sup>H NMR Spectrum of Compound 38n

OYL-ZJF-200108-4.2.fid

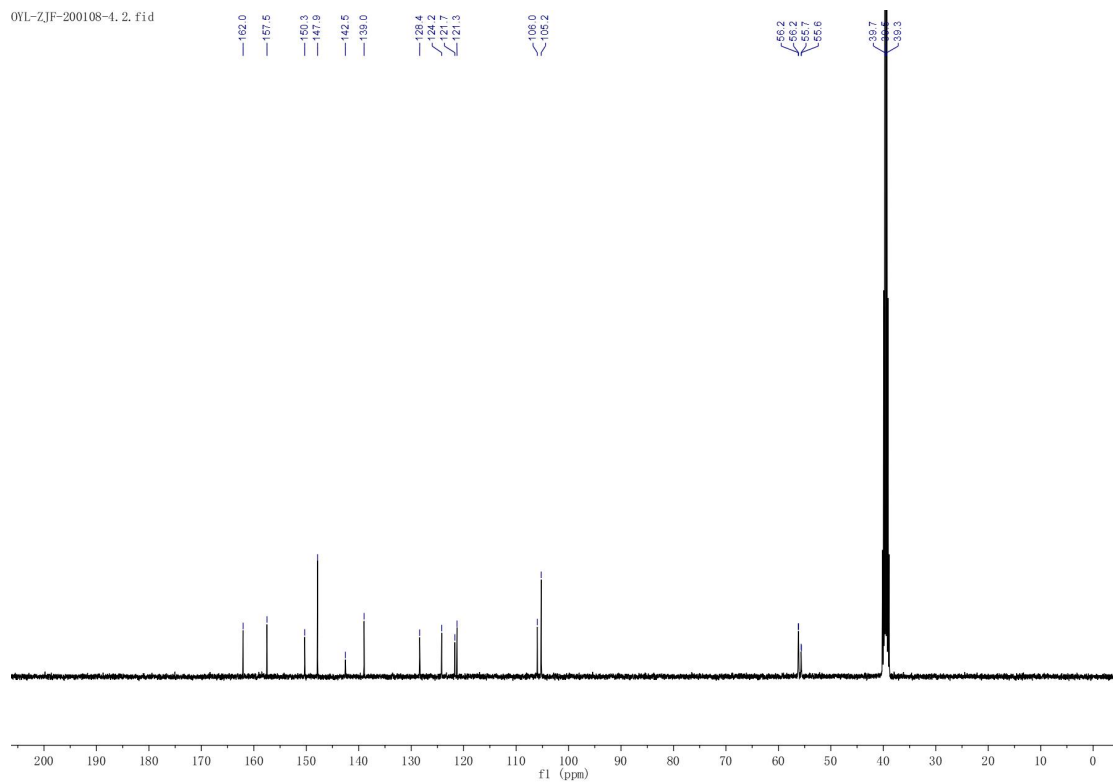

<sup>13</sup>C NMR Spectrum of Compound 38n

# 380

0YL-CJC-200108-1.1.fid

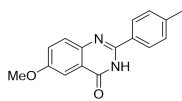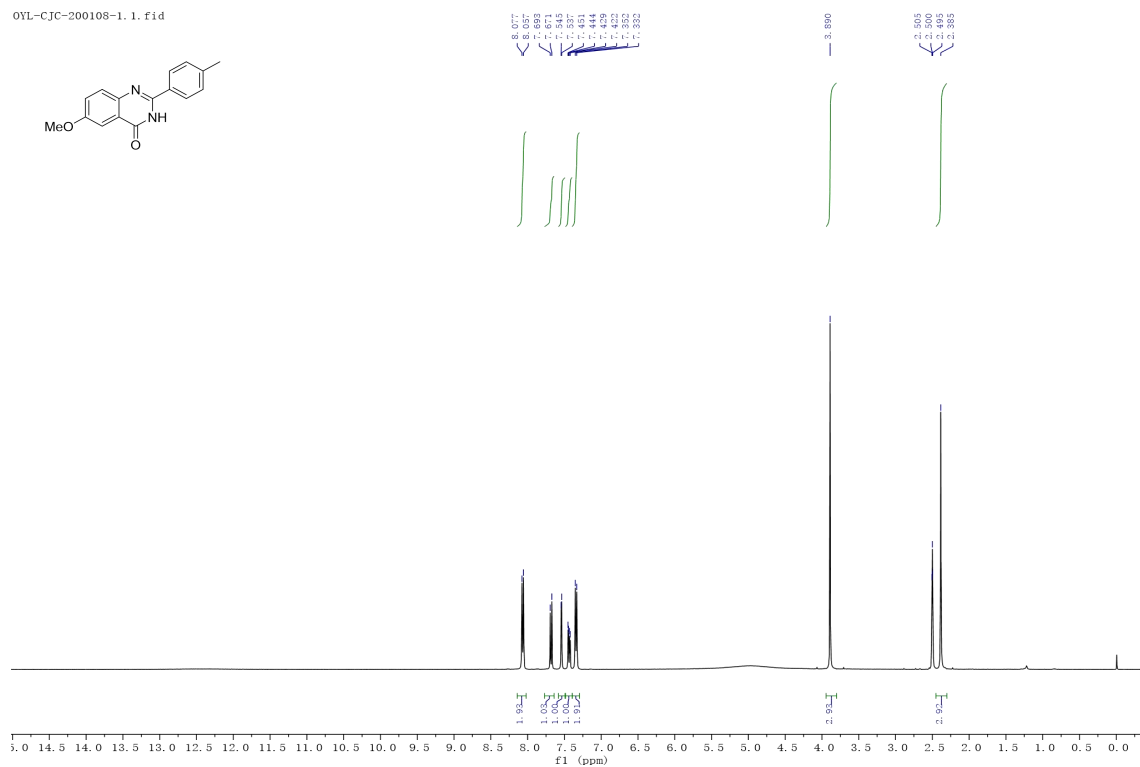

<sup>1</sup>H NMR Spectrum of Compound **380**

2021-01-23 luoyujiao-21/4

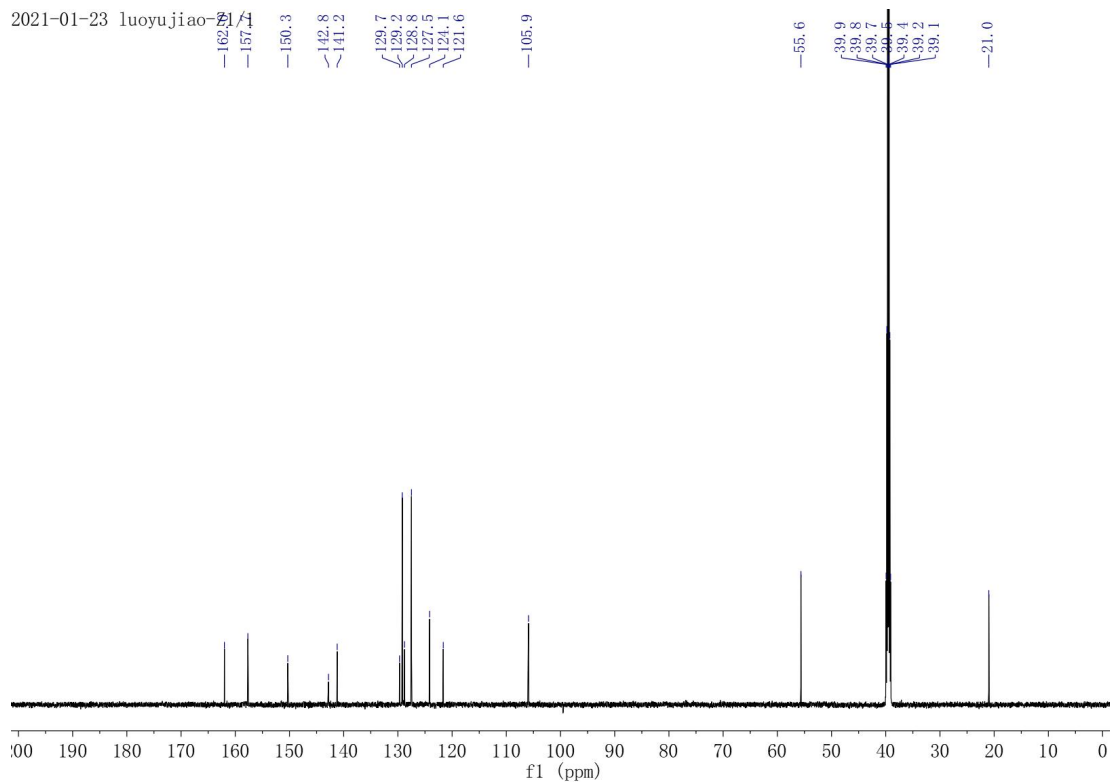

<sup>13</sup>C NMR Spectrum of Compound **380**

# 38p

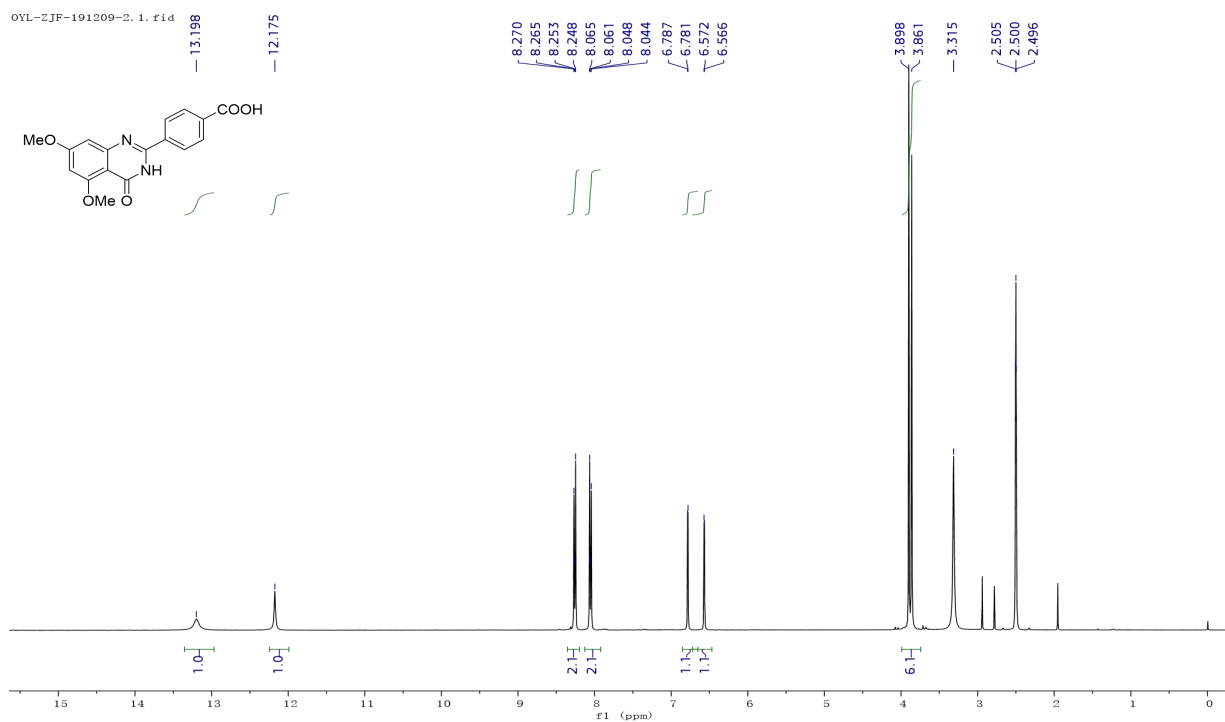

<sup>1</sup>H NMR Spectrum of Compound **38p**

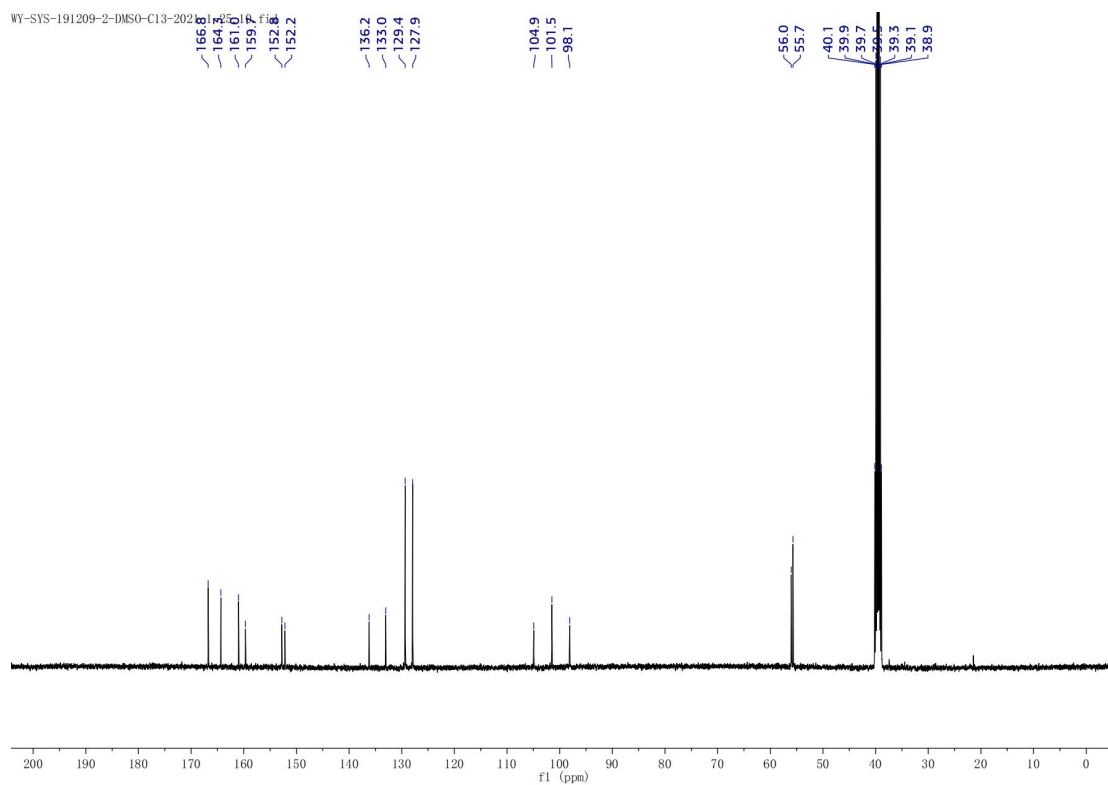

<sup>13</sup>C NMR Spectrum of Compound **38p**

# 38q

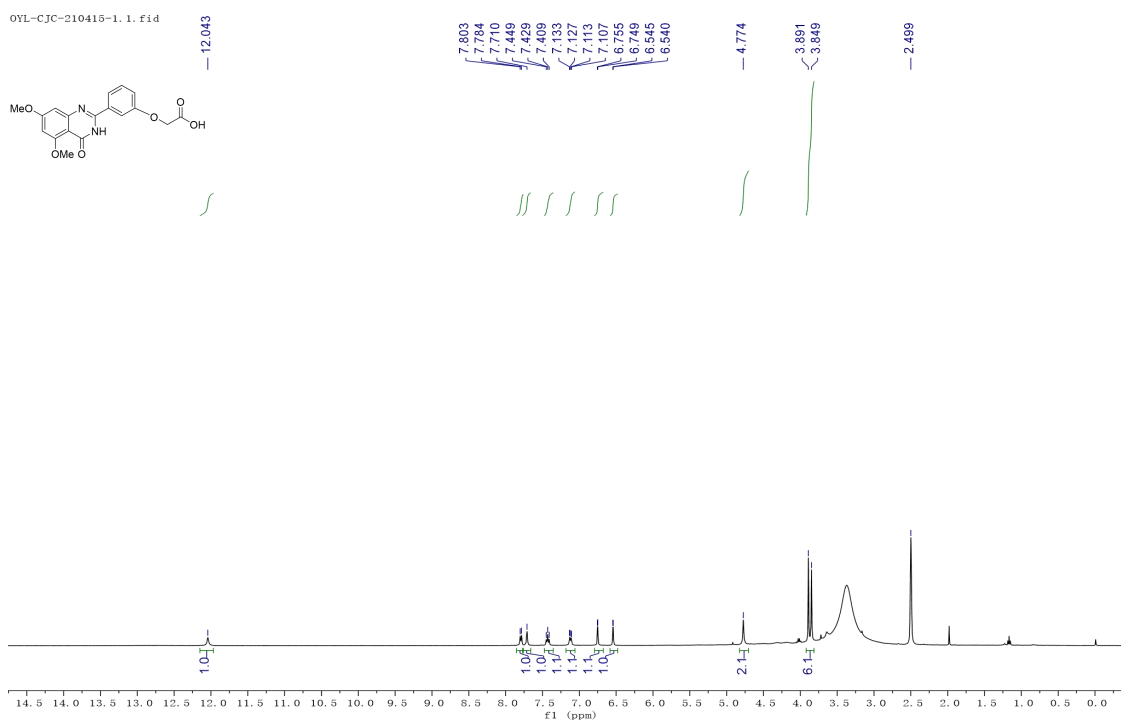

## <sup>1</sup>H NMR Spectrum of Compound 38q

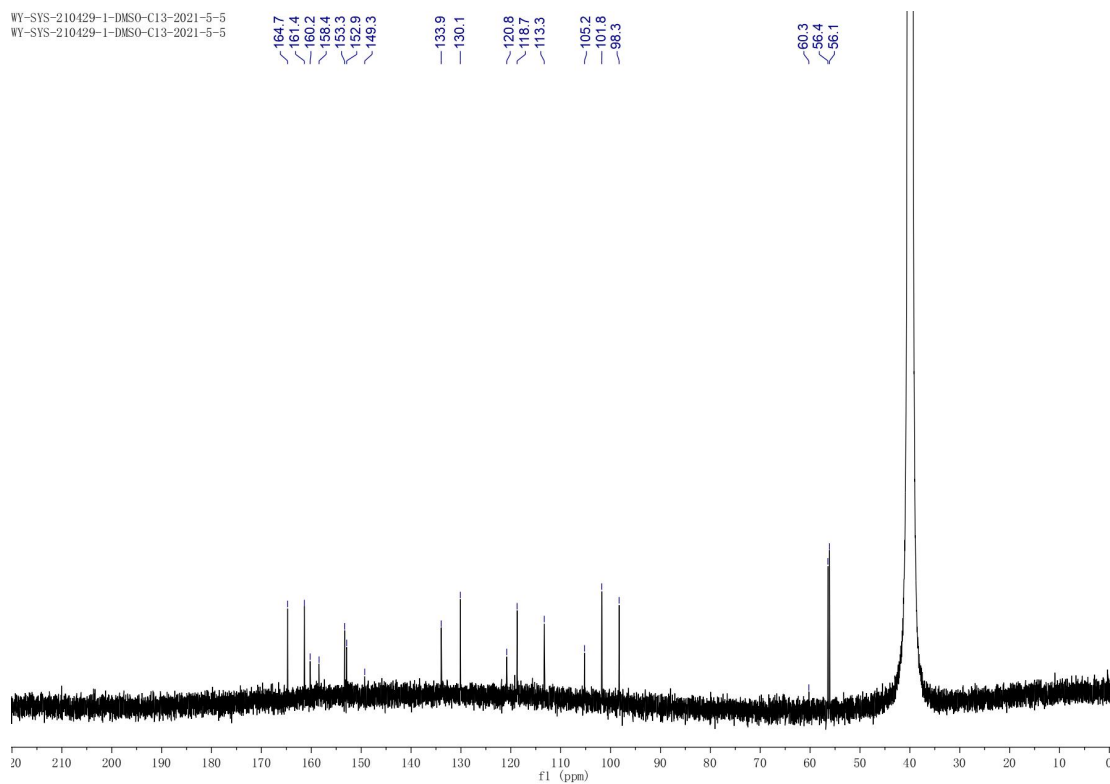

## <sup>13</sup>C NMR Spectrum of Compound 38q

# 38r

OYL-CJC-210405-1.1.fid

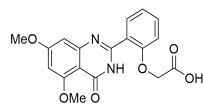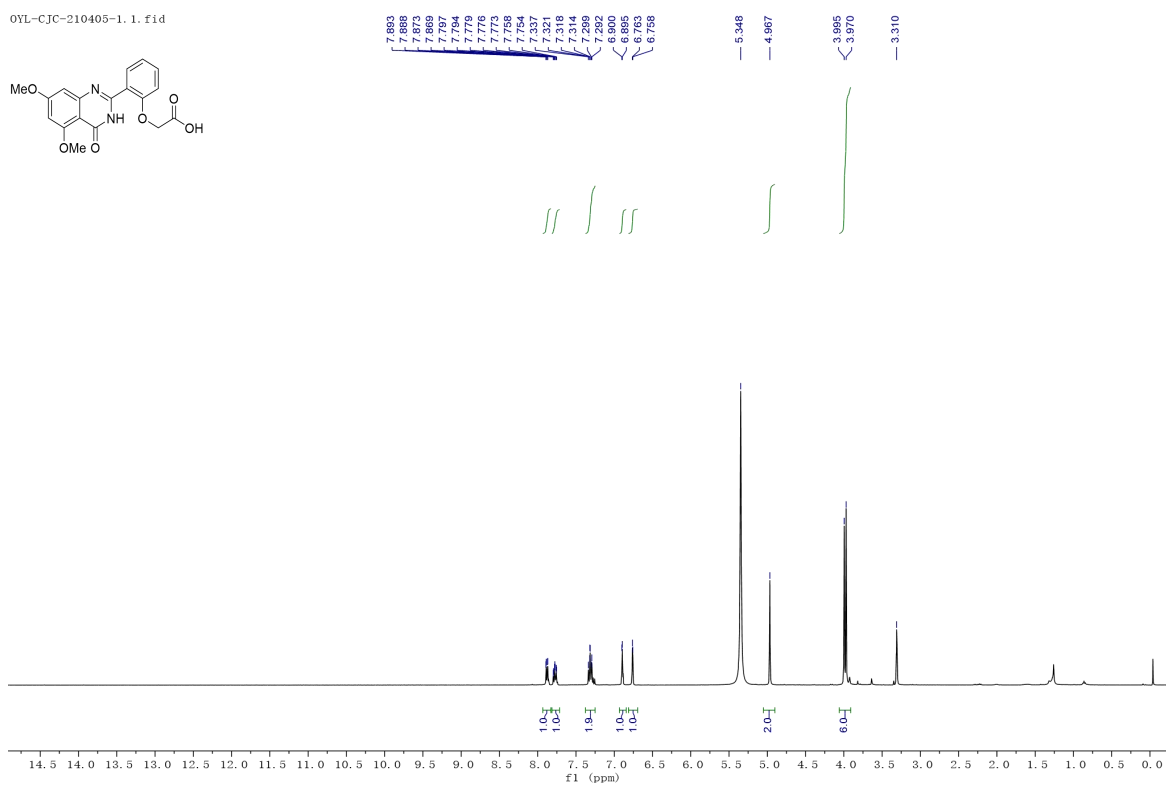

## 1H NMR Spectrum of Compound 38r

WY-SYS-210405-1-DMSO-C13-2021

WY-SYS-210405-1-DMSO-C13-2021

166.6  
163.2  
158.4  
155.0  
154.8  
152.3  
151.9

138.2  
132.2  
126.8  
118.4  
109.8

98.7  
95.1  
90.7

61.8  
51.8  
51.5

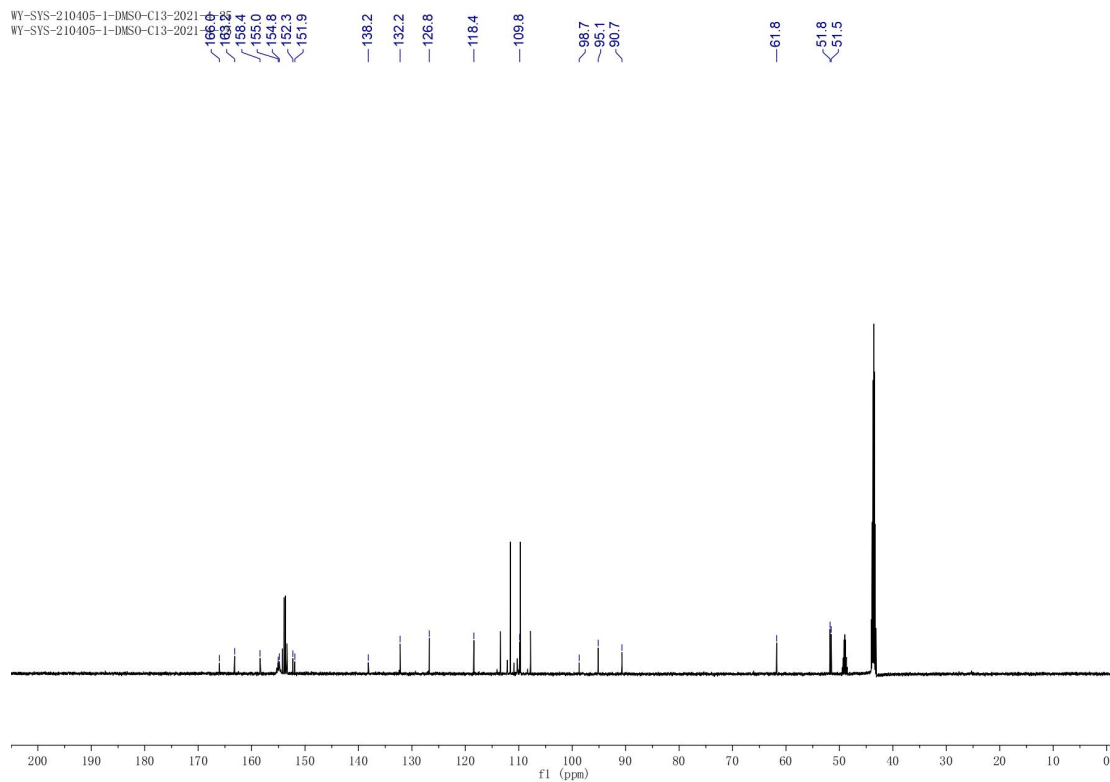

## 13C NMR Spectrum of Compound 38r



38s

0YL-CJC-210408-1.1.fid

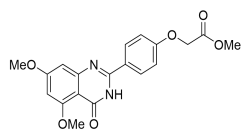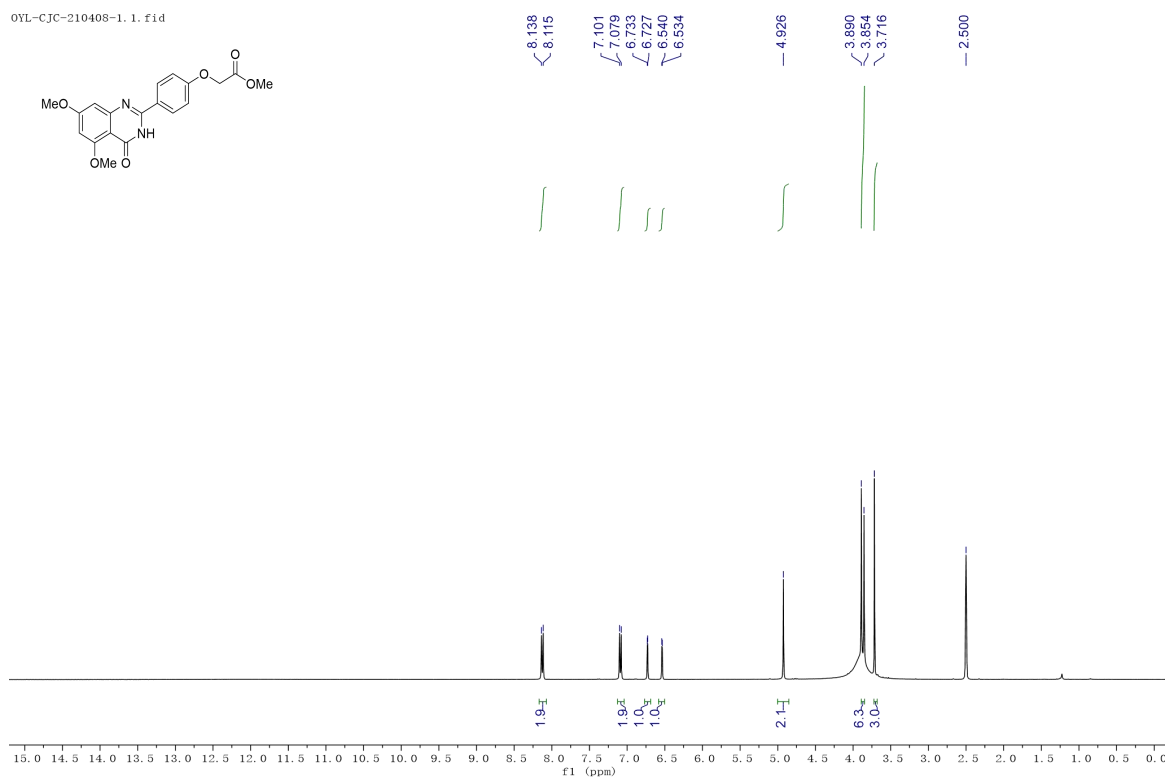

<sup>1</sup>H NMR Spectrum of Compound 38s

0YL-CJC-210408-1.2.fid

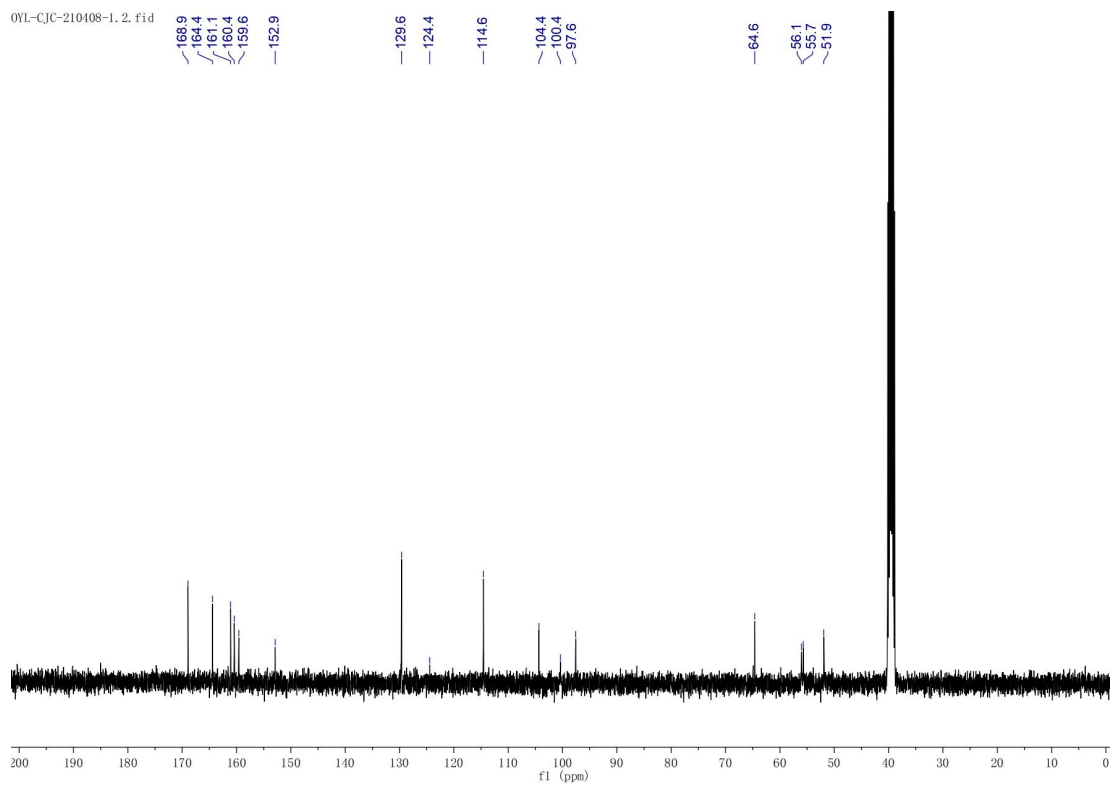

<sup>13</sup>C NMR Spectrum of Compound 38s

26

0VL-CJC-210409-1.1.f1d

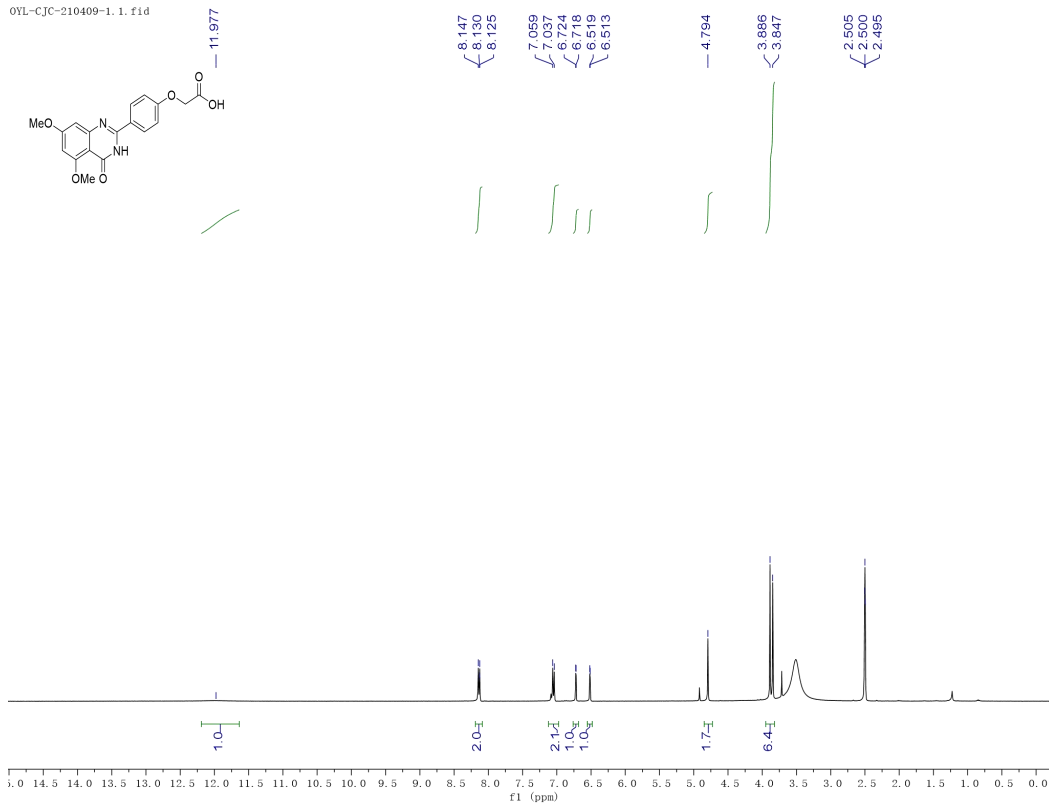

<sup>1</sup>H NMR Spectrum of Compound 26

0VL-CJC-210409-1.2.f1d

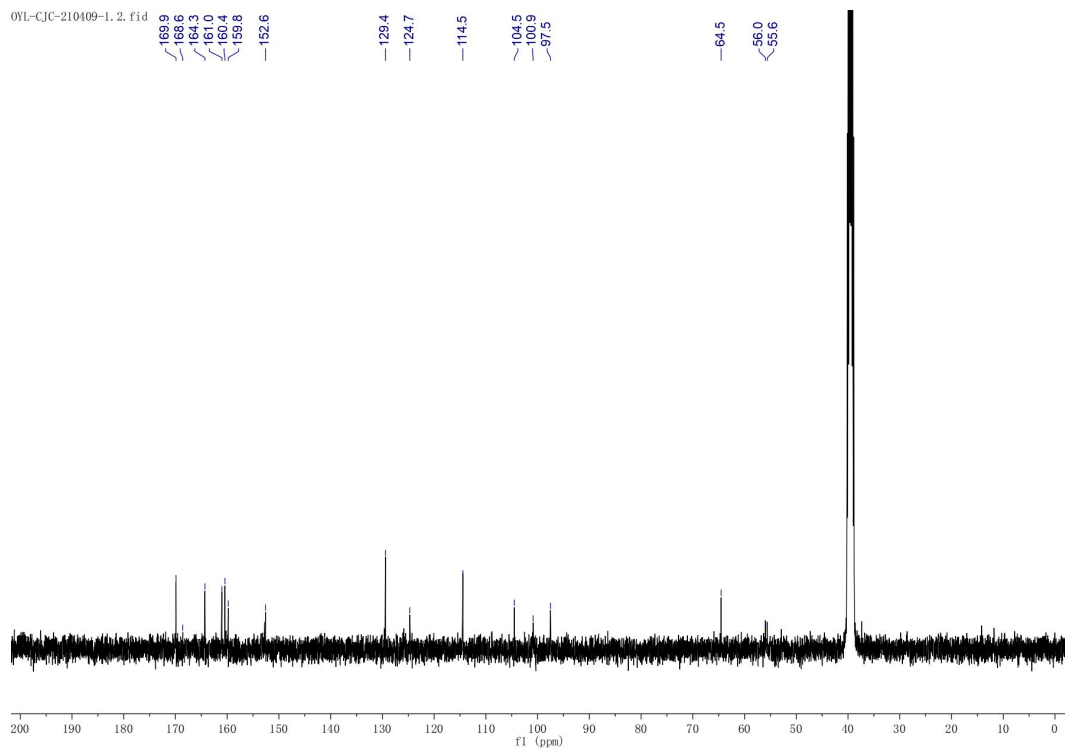

<sup>13</sup>C NMR Spectrum of Compound 26

# 42a

OYL-CJC-201104-1CF. 1. fid

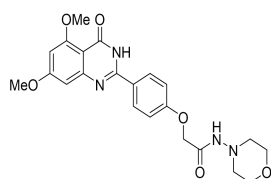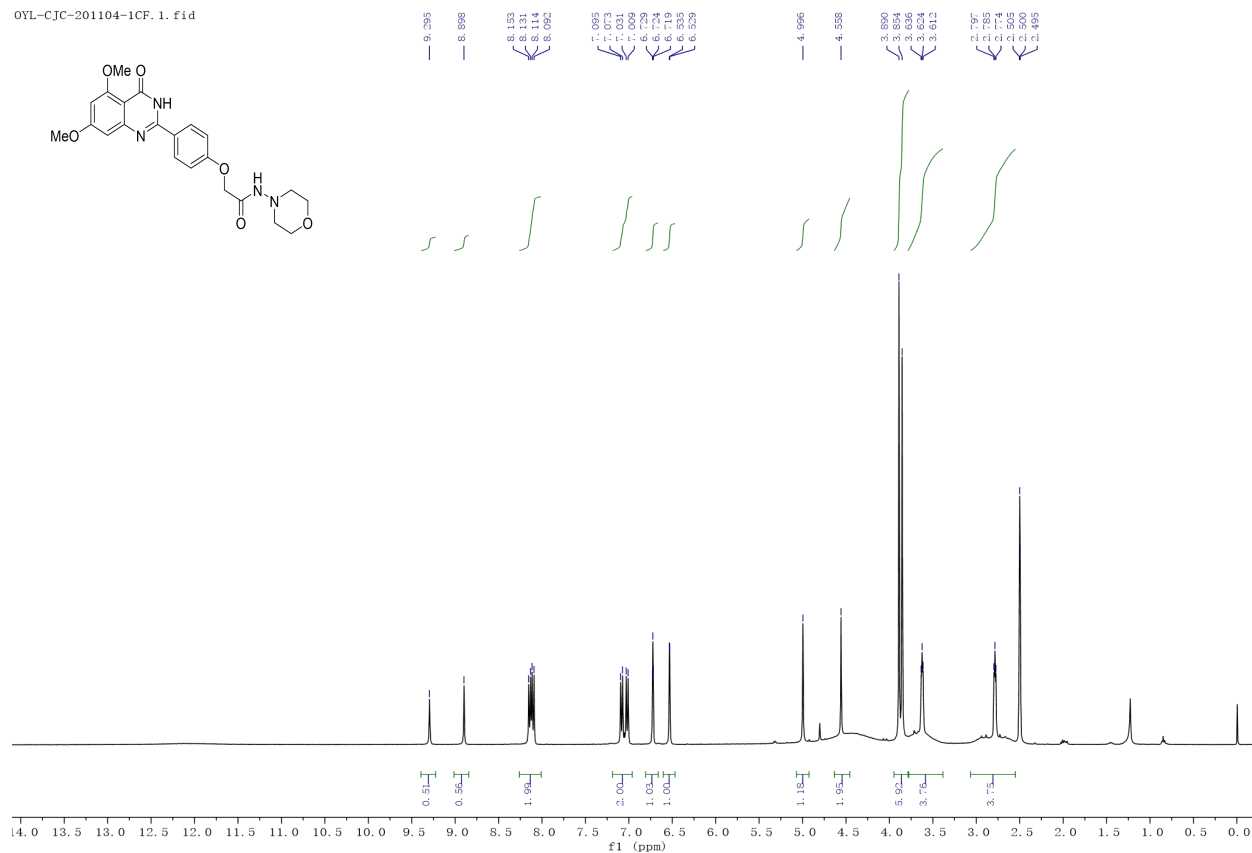

## <sup>1</sup>H NMR Spectrum of Compound 42a

WY-SYS-201104-1-013.DMSO-2020-11-41.10.fid

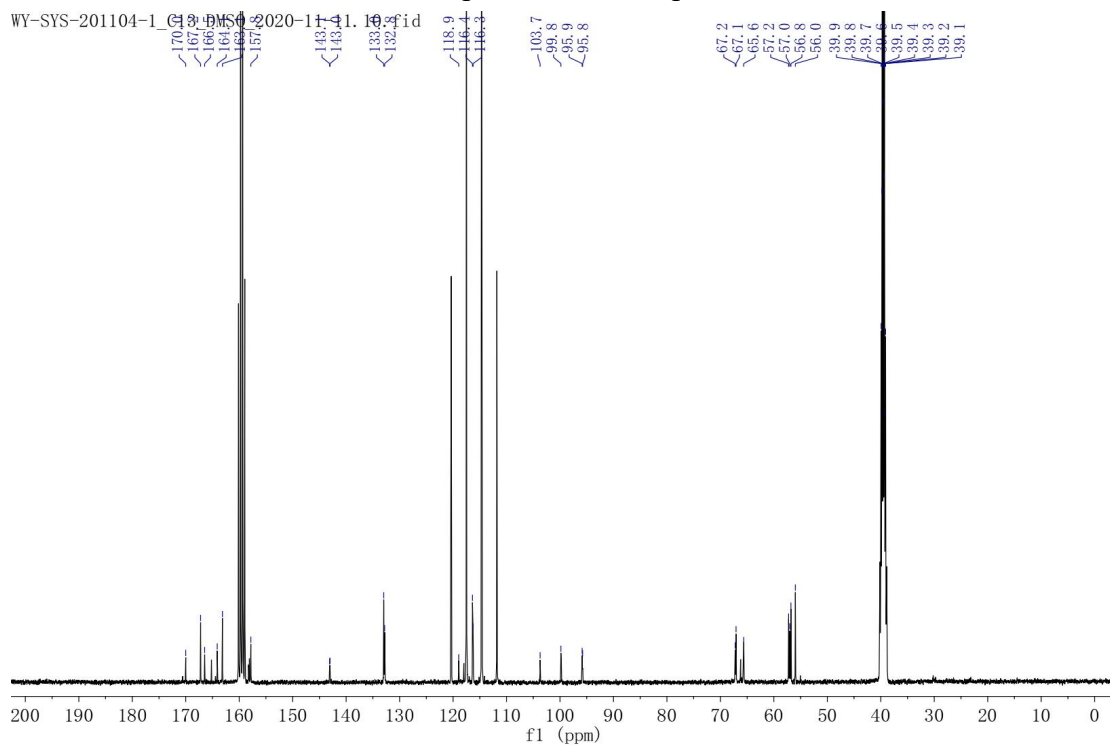

## <sup>13</sup>C NMR Spectrum of Compound 42a

# 42b

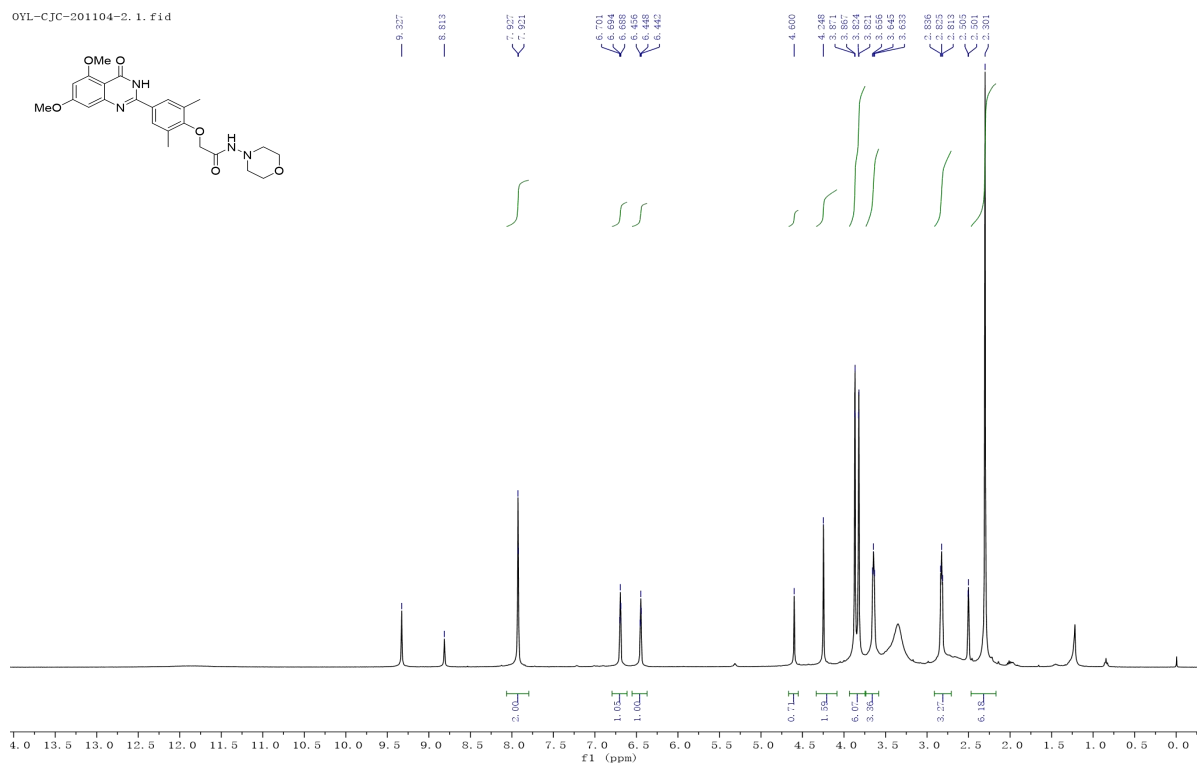

<sup>1</sup>H NMR Spectrum of Compound 42b

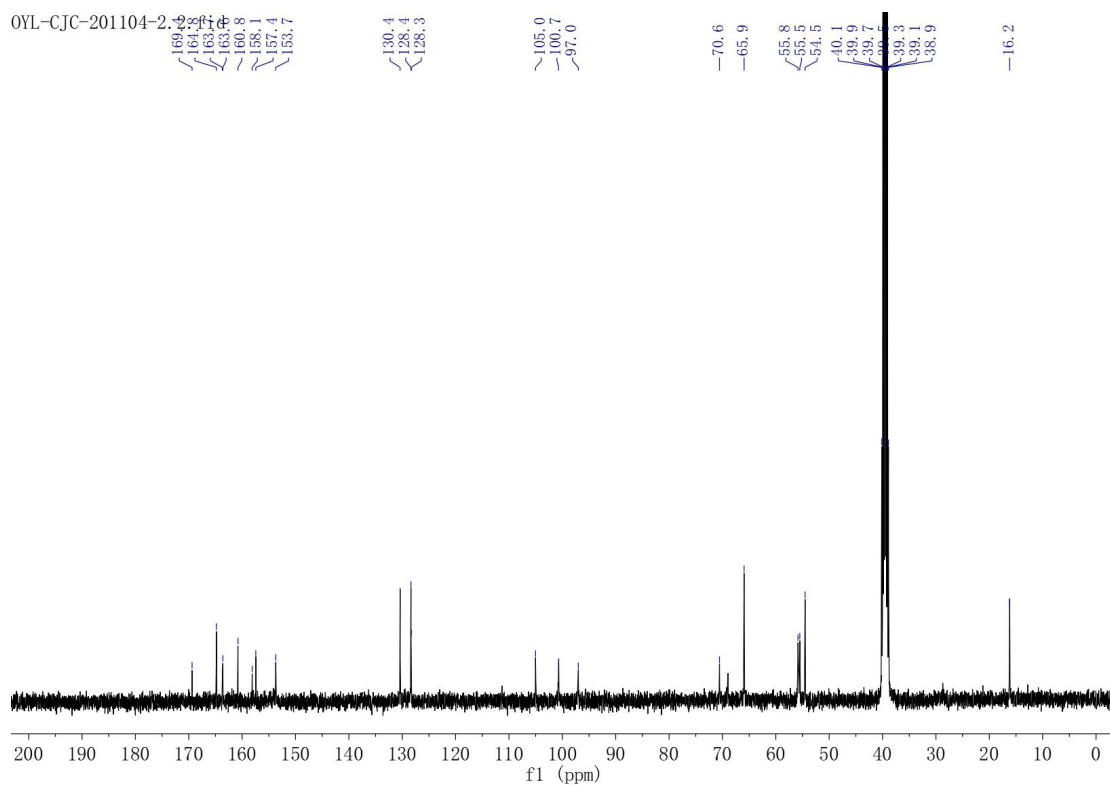

<sup>13</sup>C NMR Spectrum of Compound 42b

# 42c

OYL-CJC-201108-1.1.fid

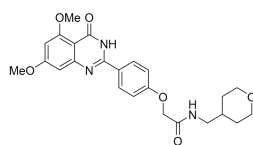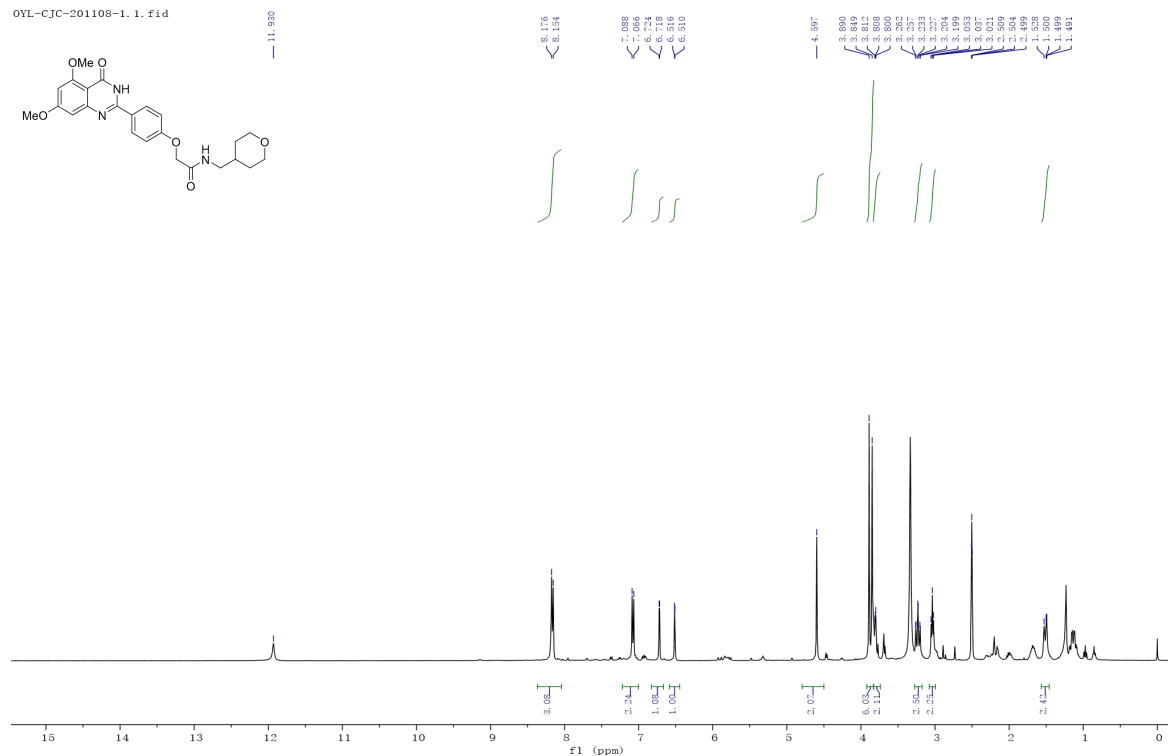

## <sup>1</sup>H NMR Spectrum of Compound 42c

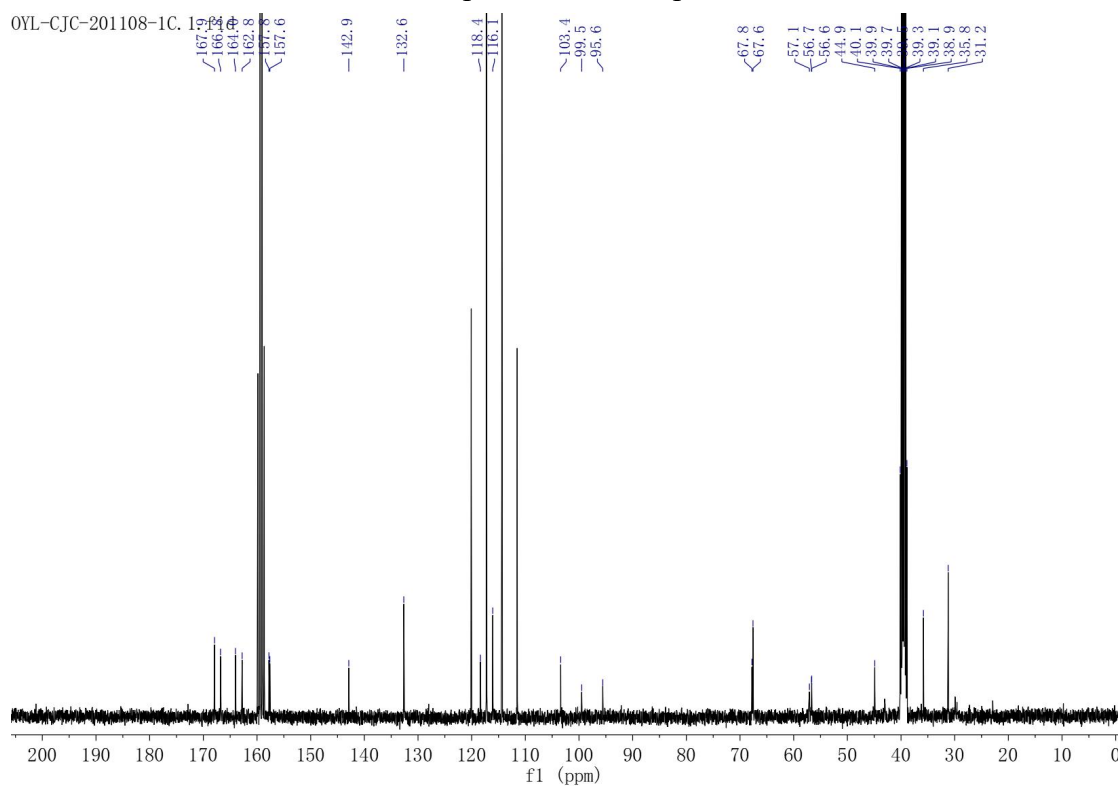

## <sup>13</sup>C NMR Spectrum of Compound 42c

# 42d

OVL-CJC-201108-2.1.fid

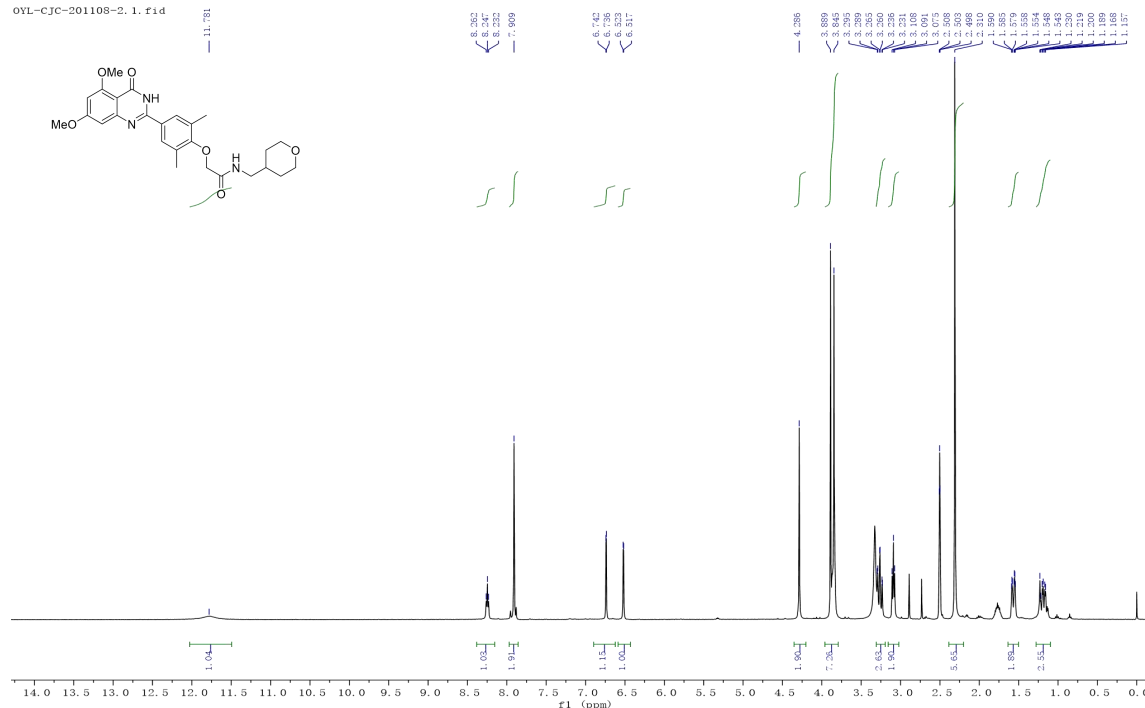

<sup>1</sup>H NMR Spectrum of Compound 42d

OVL-CJC-201108-2C.

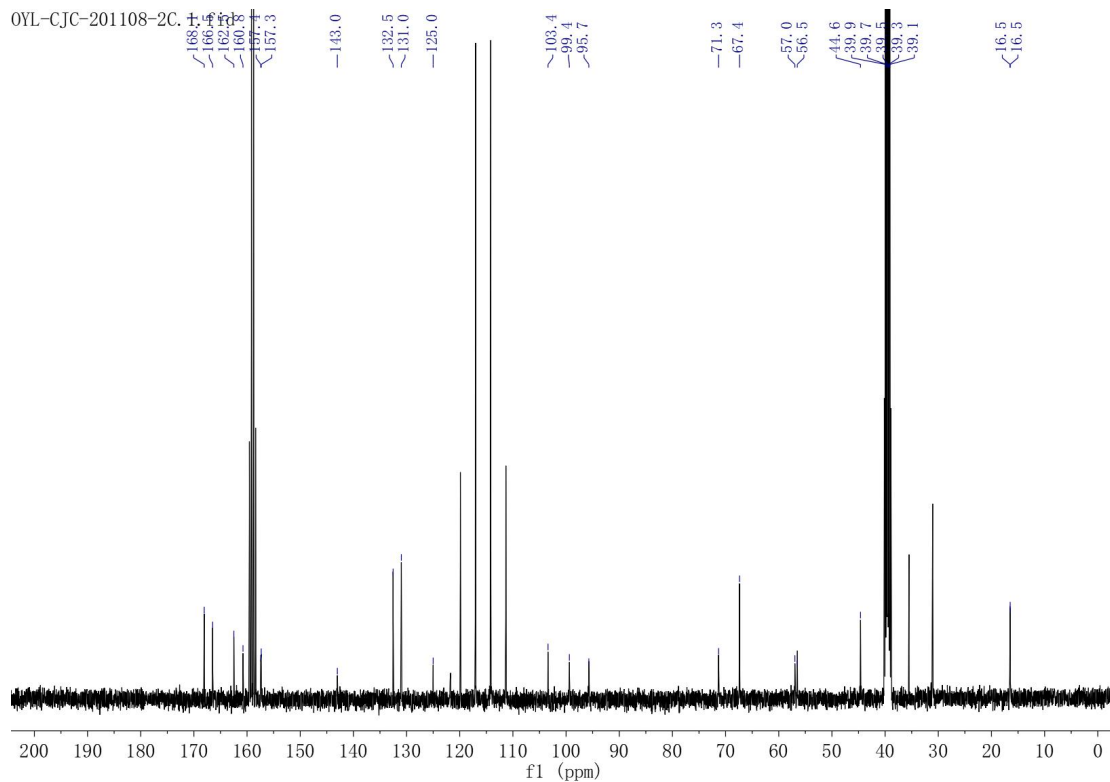

<sup>13</sup>C NMR Spectrum of Compound 42d

# 42e

OYL-CJC-201110-2. 1. fid

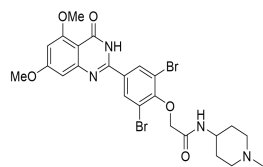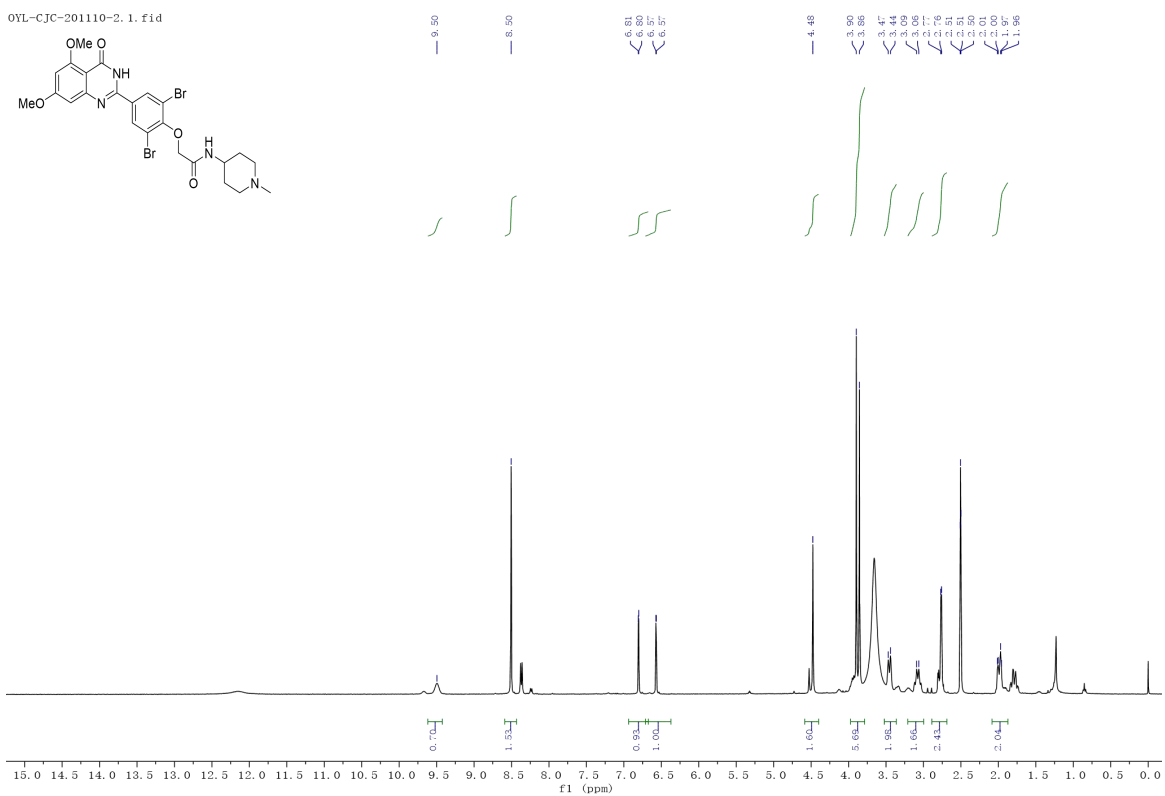

## <sup>1</sup>H NMR Spectrum of Compound 42e

OYL-CJC-201110-2C. 2.

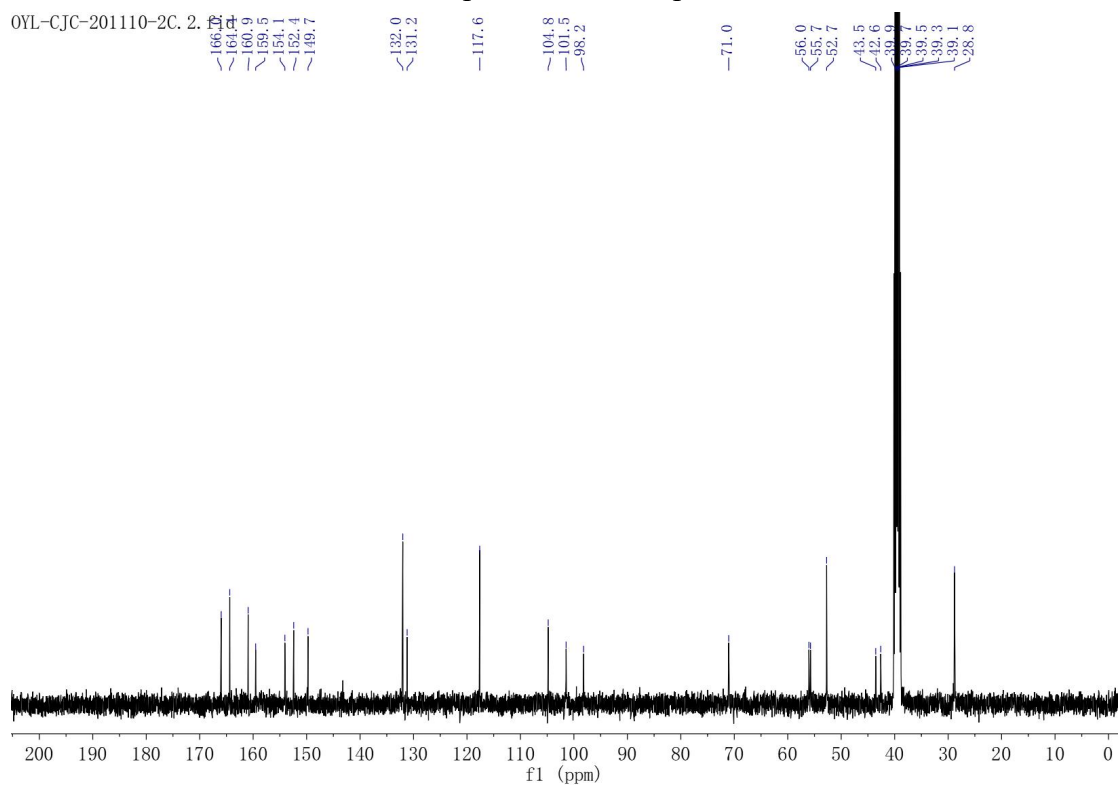

## <sup>13</sup>C NMR Spectrum of Compound 42e

# 42f

OYL-CJC-201109-1.1.fid

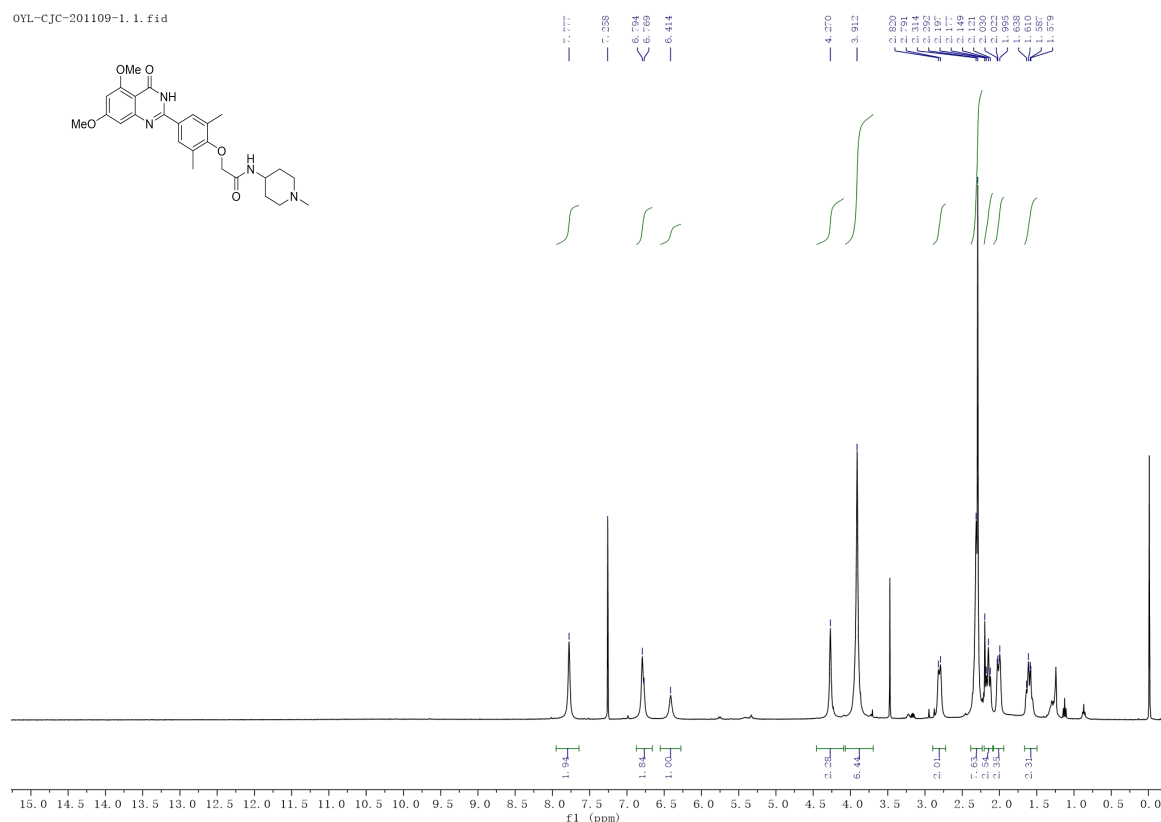

## <sup>1</sup>H NMR Spectrum of Compound 42f

OYL-CJC-201109-1C.

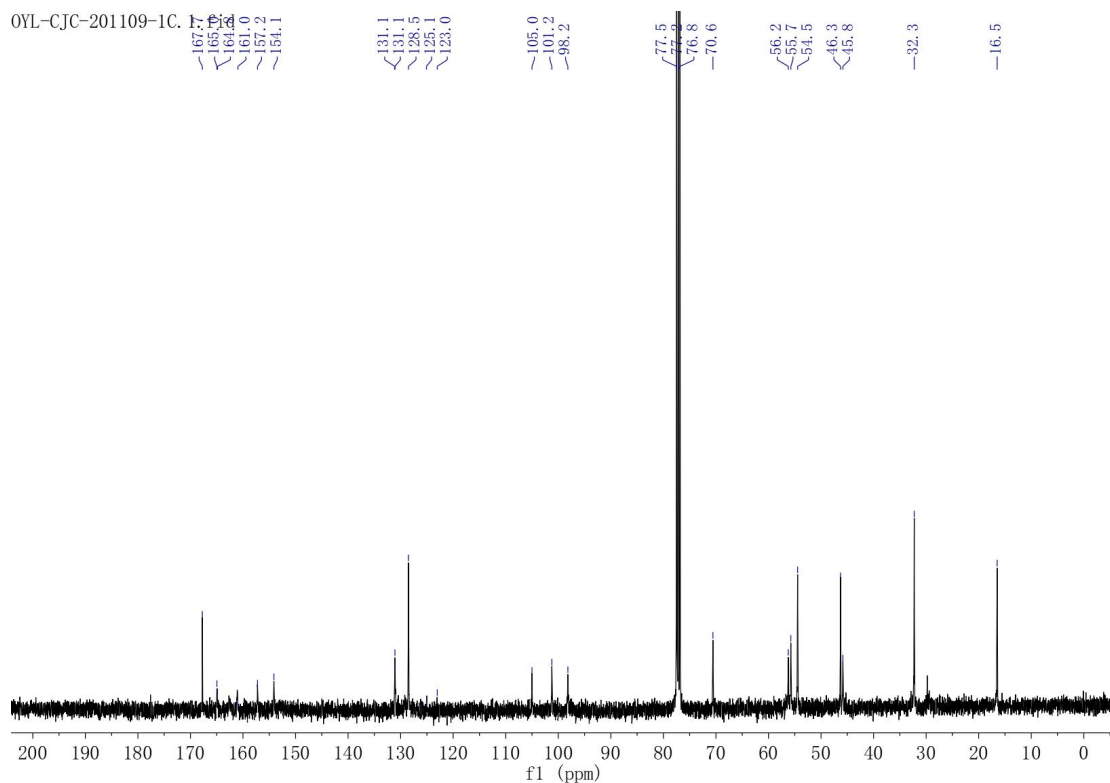

## <sup>13</sup>C NMR Spectrum of Compound 42f



# 42g

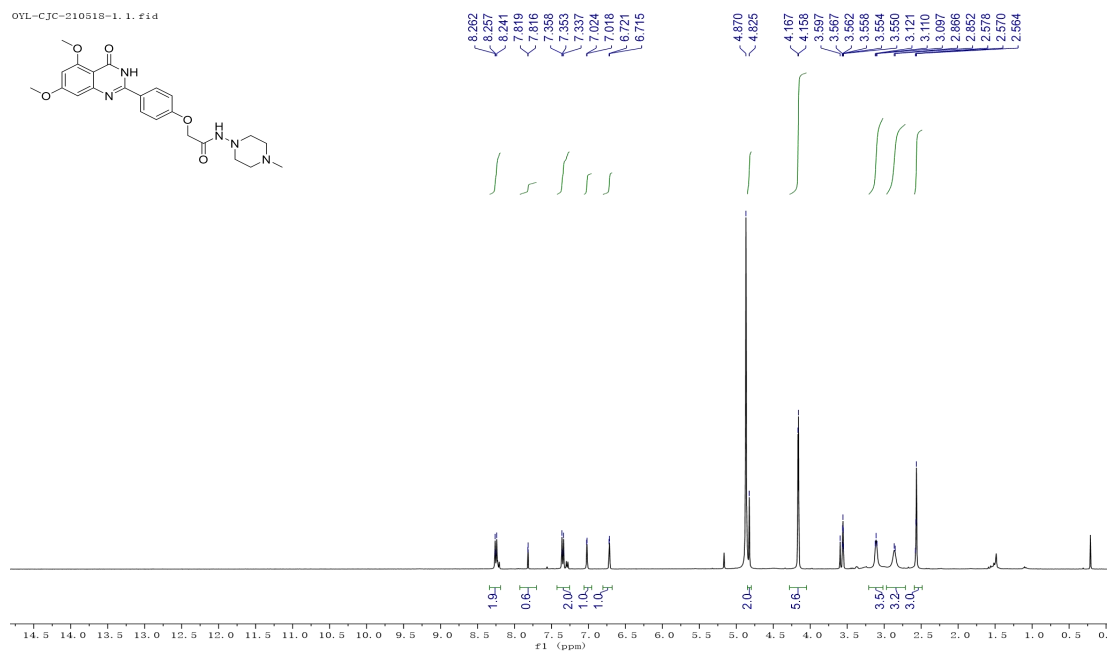

<sup>1</sup>H NMR Spectrum of Compound 42g

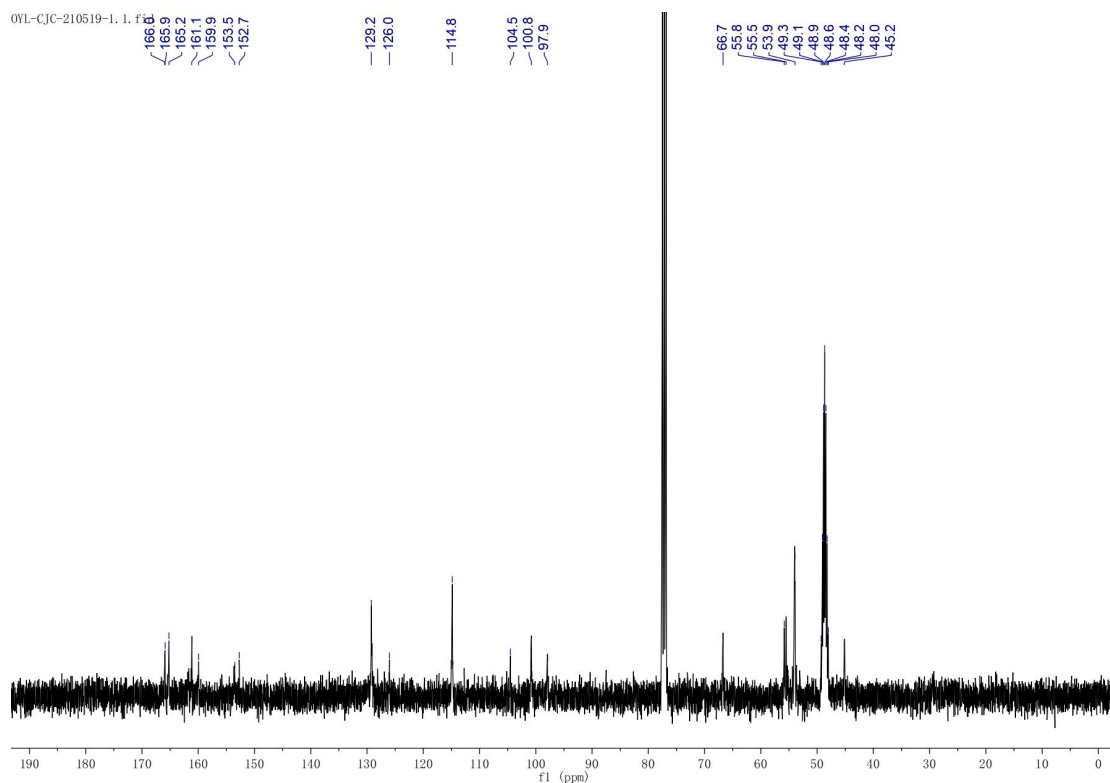

<sup>13</sup>C NMR Spectrum of Compound 42g

42h

OYL-CJC-201120-2H.1.fid

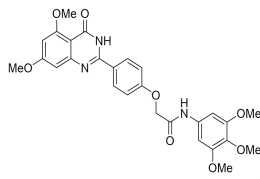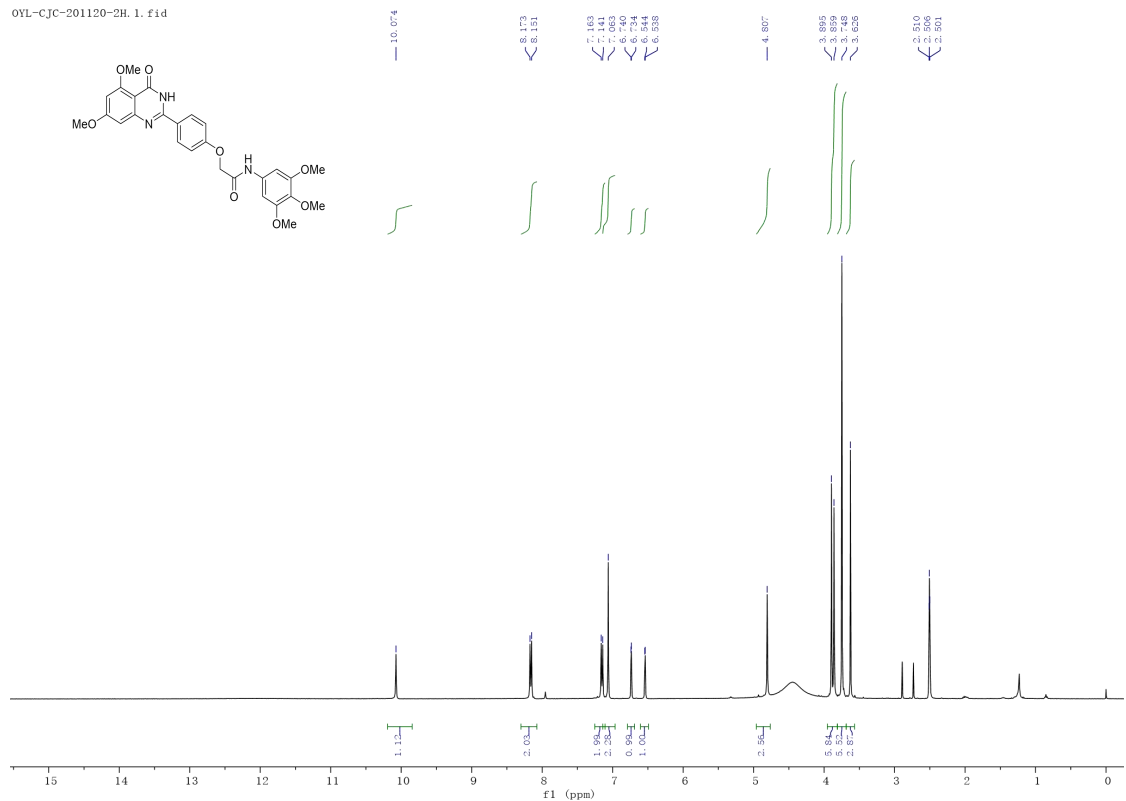

<sup>1</sup>H NMR Spectrum of Compound 42h

OYL-CJC-201120-2C.fid

166.4, 164.4, 161.7, 160.7, 159.5, 153.0, 152.7, 151.7

134.5, 133.7, 129.7, 124.2

-114.7

104.3, 100.2, 97.6, 97.4

67.1, 60.1, 60.1, 56.0, 55.7, 55.7, 55.7, 55.7, 40.1, 38.4, 38.4, 30.3, 29.1, 28.9

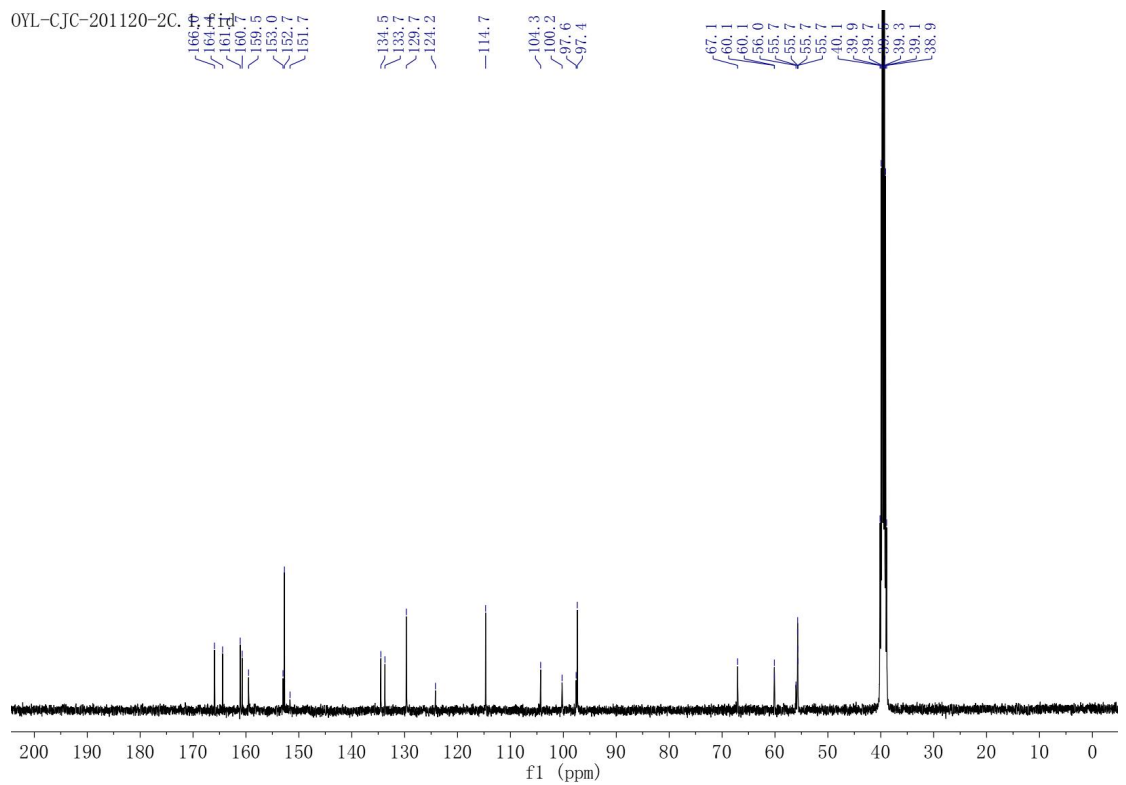

<sup>13</sup>C NMR Spectrum of Compound 42h

42i

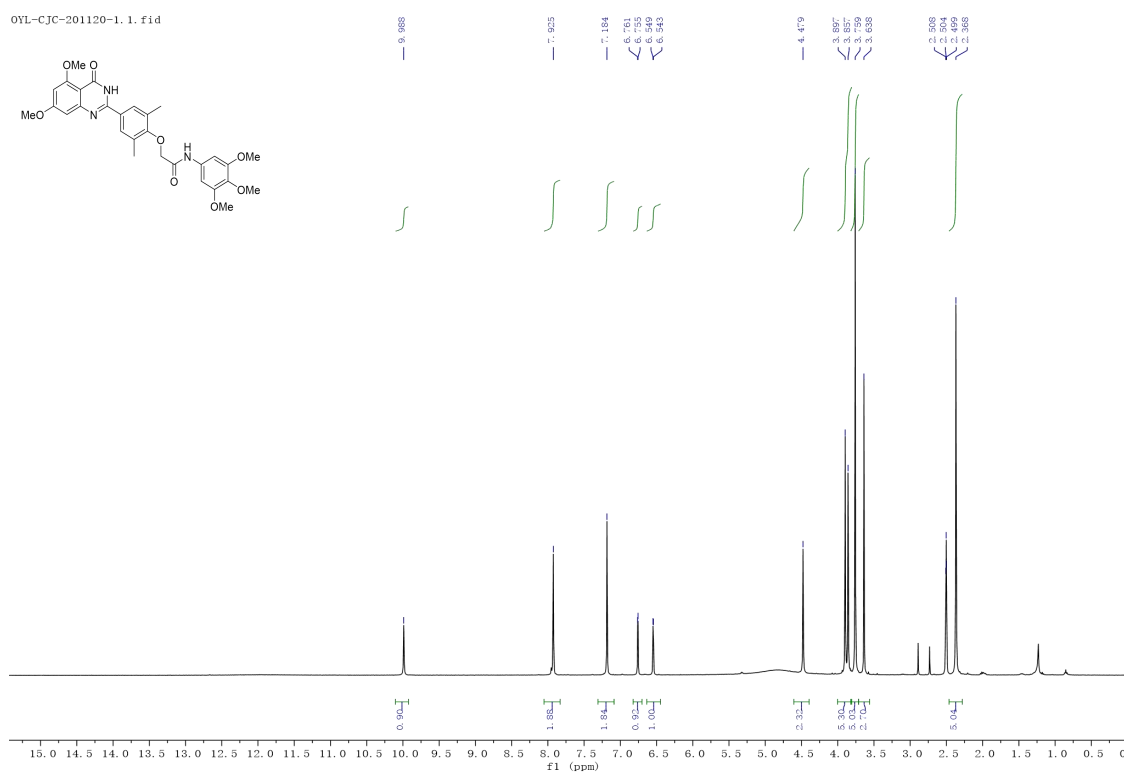

<sup>1</sup>H NMR Spectrum of Compound 42i

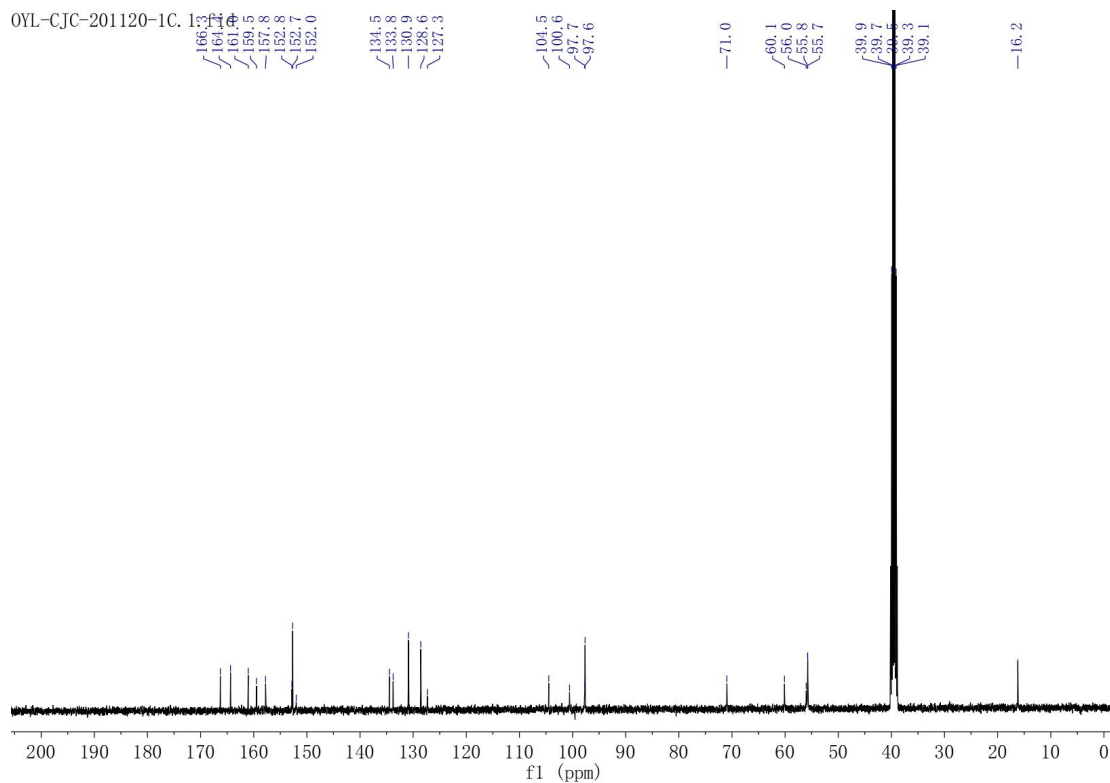

<sup>13</sup>C NMR Spectrum of Compound 42i

# 42j

OYL-CJC-200925-1.1.fid

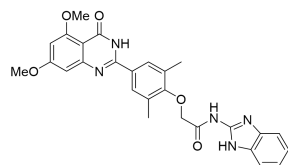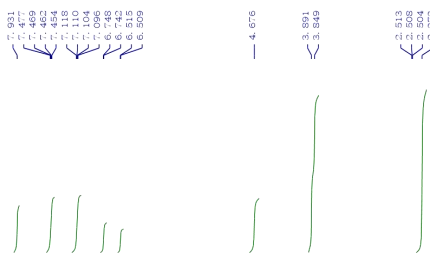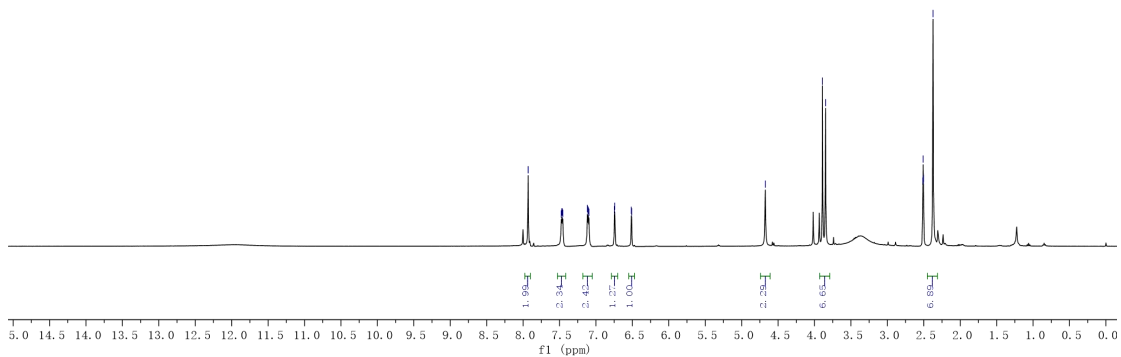

## <sup>1</sup>H NMR Spectrum of Compound 42j

OYL-CJC-200925

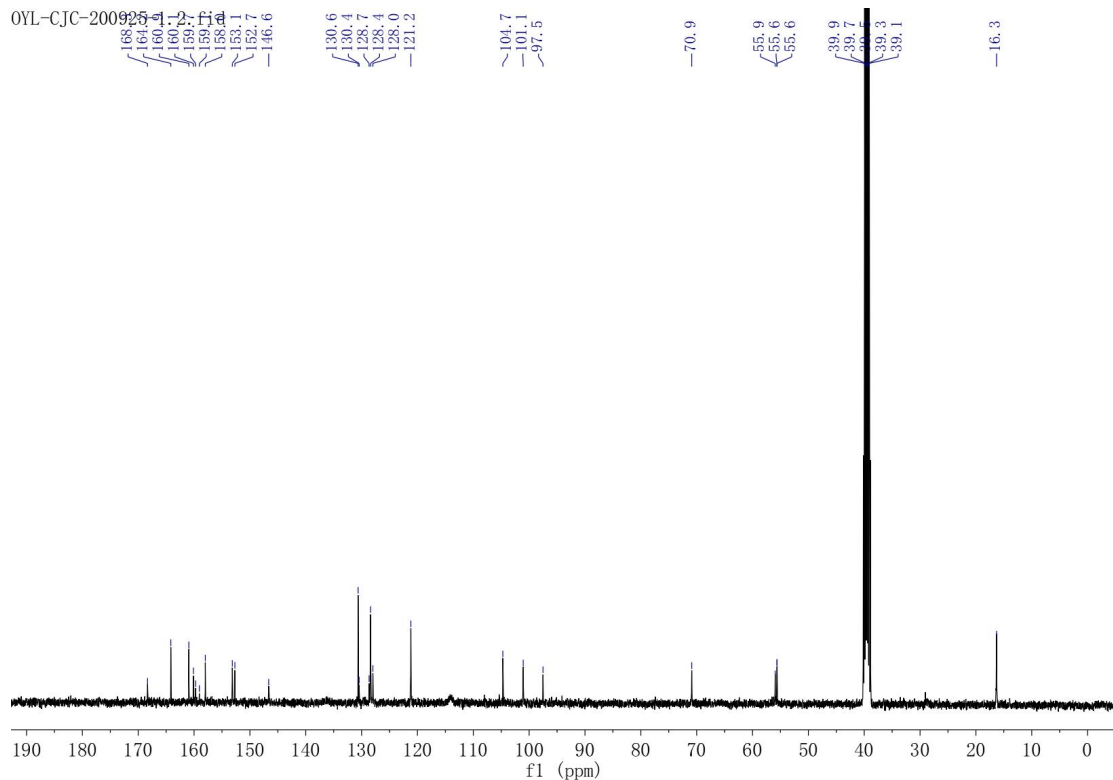

## <sup>13</sup>C NMR Spectrum of Compound 42j

# 43a

OYL-CJC-201018-1.1.fid

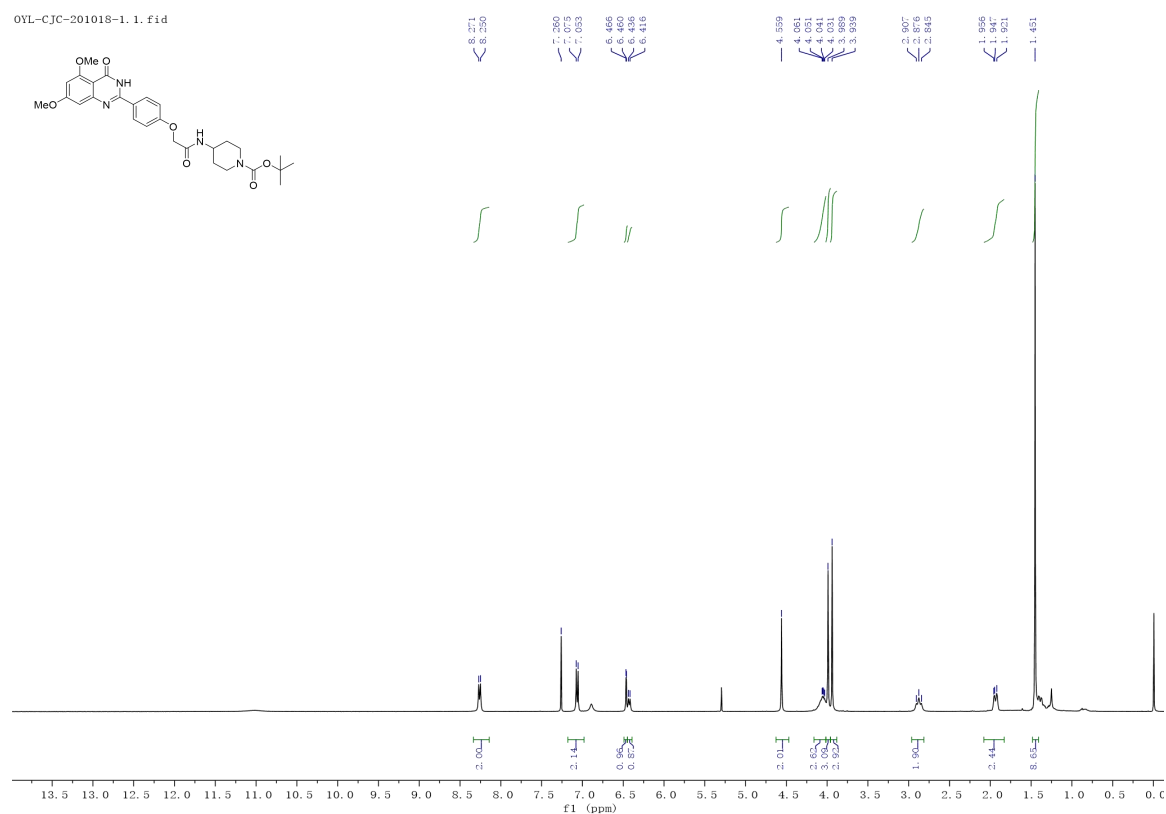

## <sup>1</sup>H NMR Spectrum of Compound 43a

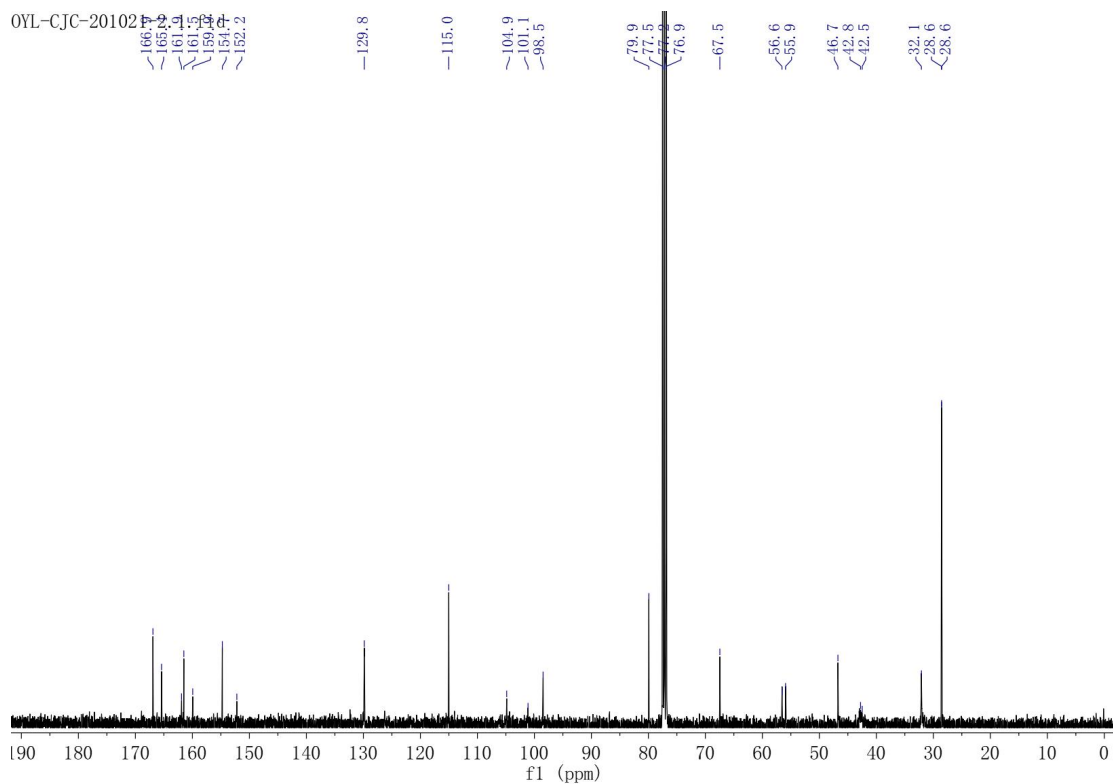

## <sup>13</sup>C NMR Spectrum of Compound 43a

# 43b

OYL-CJC-201008-A. 1. fid

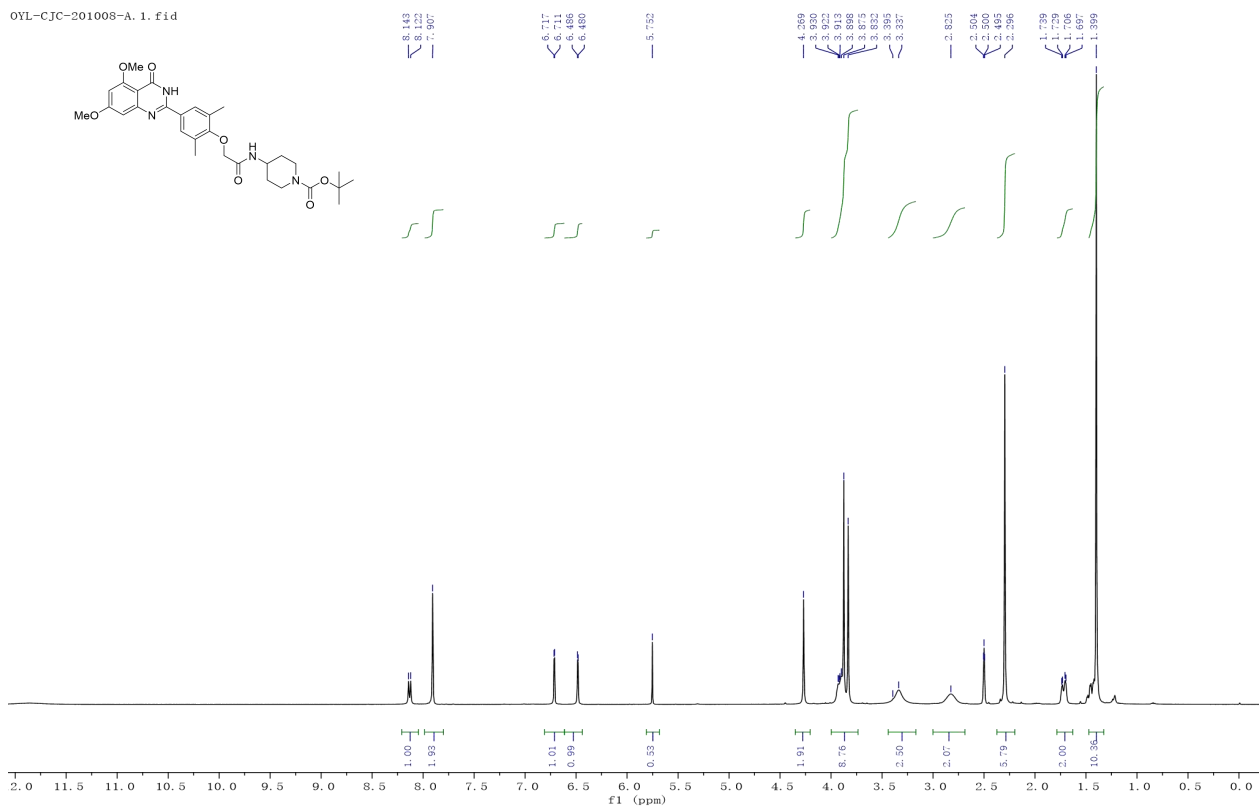

**<sup>1</sup>H NMR Spectrum of Compound 43b**

OYL-CJC-201008-A. 2. fid

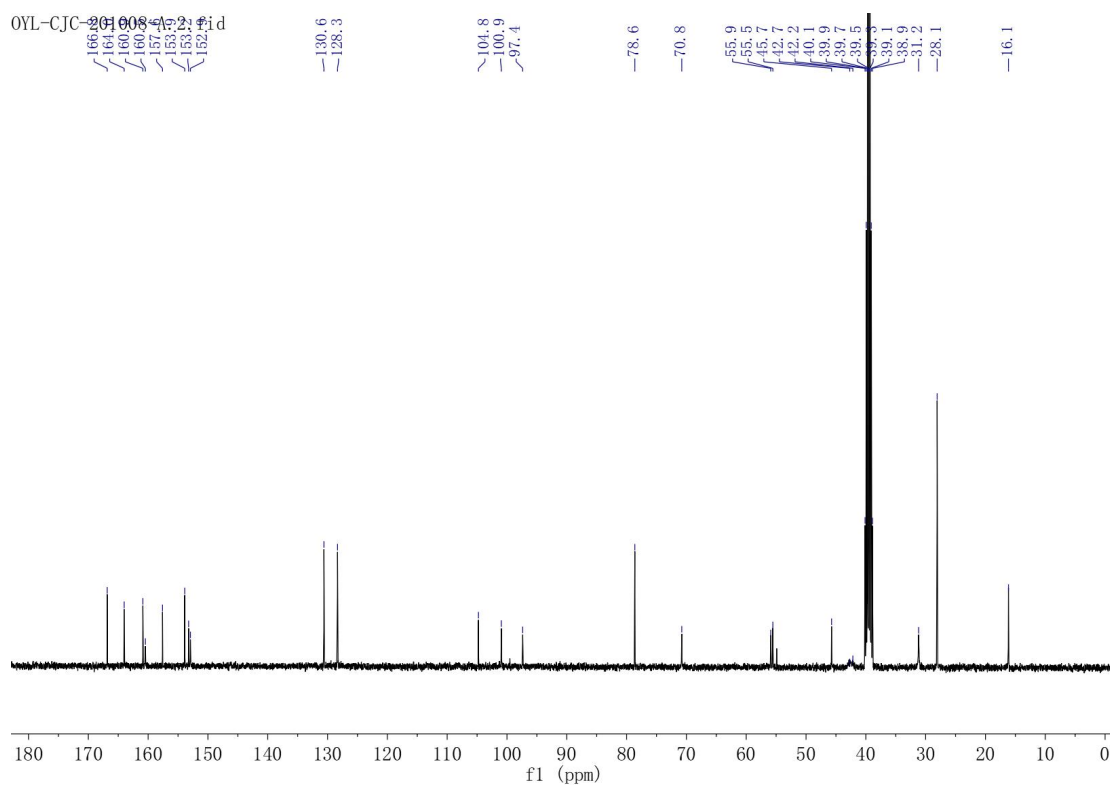

**<sup>13</sup>C NMR Spectrum of Compound 43b**

### 43c

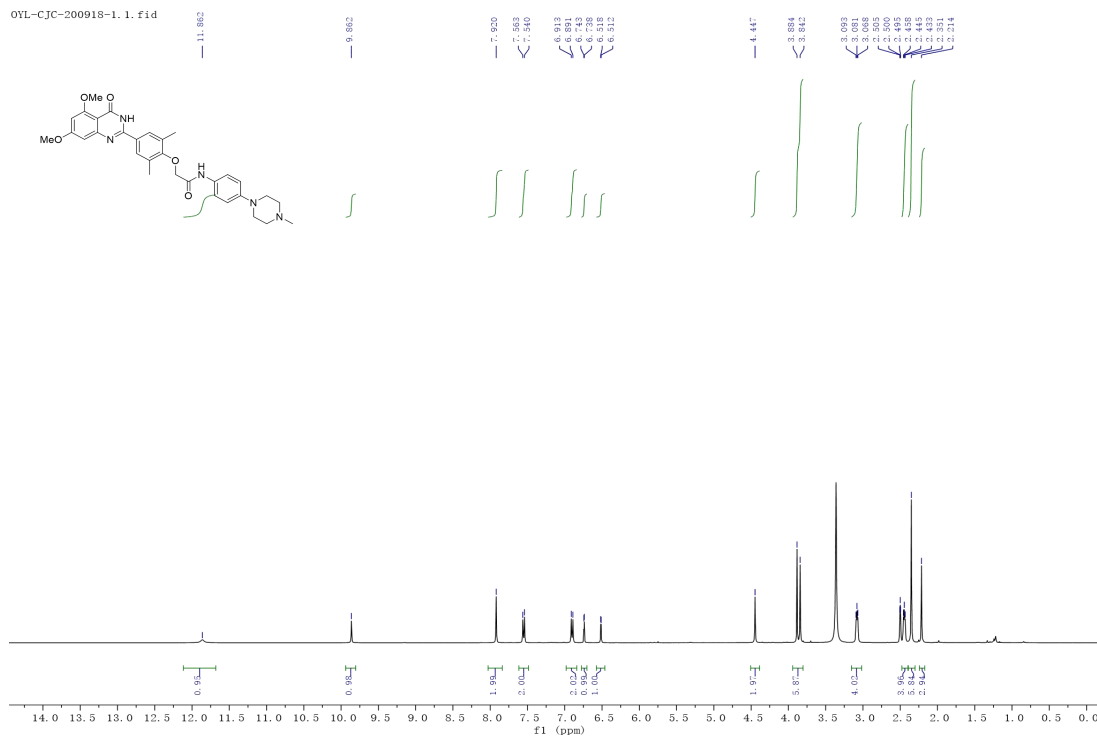

### <sup>1</sup>H NMR Spectrum of Compound 43c

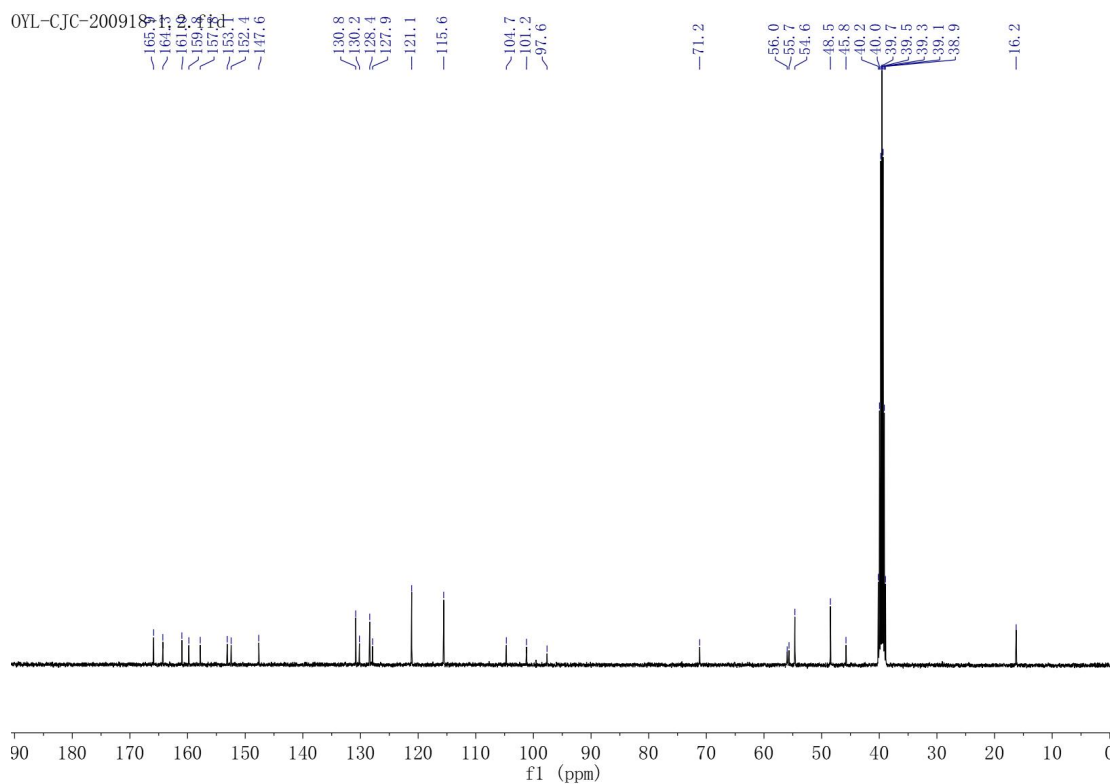

### <sup>13</sup>C NMR Spectrum of Compound 43c

# 43d

OYL-CJC-210424-5.1.fid

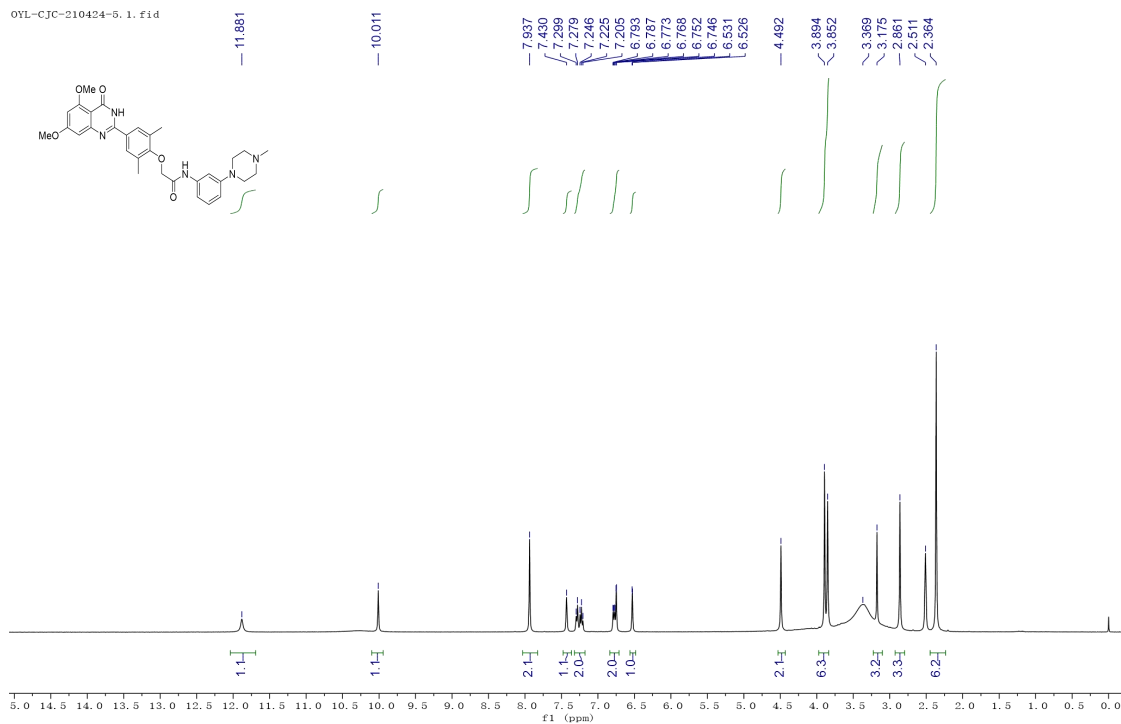

<sup>1</sup>H NMR Spectrum of Compound 43d

OYL-CJC-210424-5.2.fid

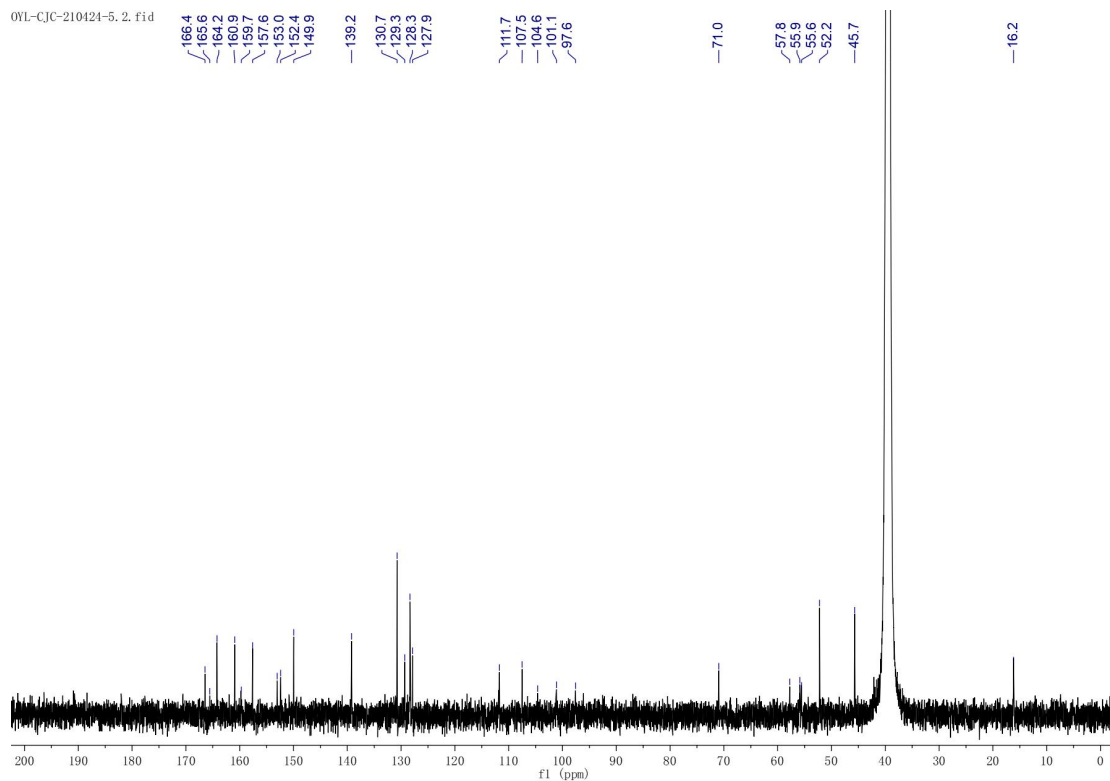

<sup>13</sup>C NMR Spectrum of Compound 43d



# 43e

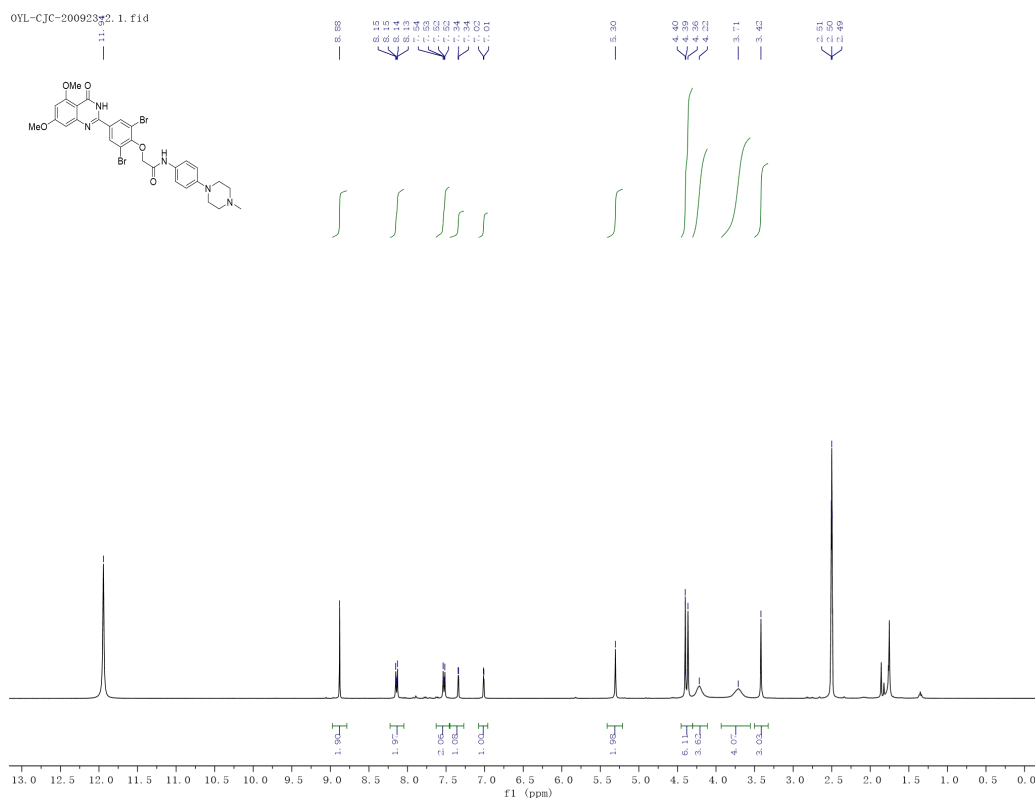

<sup>1</sup>H NMR Spectrum of Compound 43e

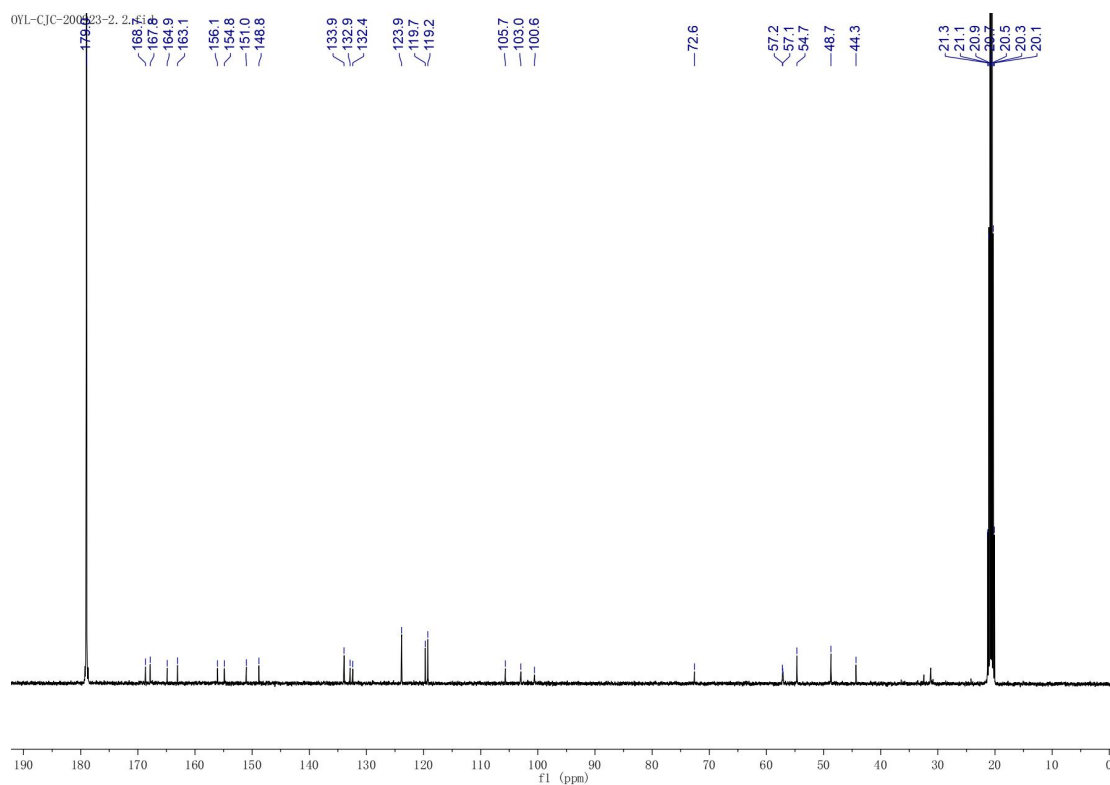

<sup>13</sup>C NMR Spectrum of Compound 43e

# 43f

OVL-CJC-200919-1.1.fid

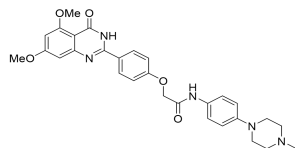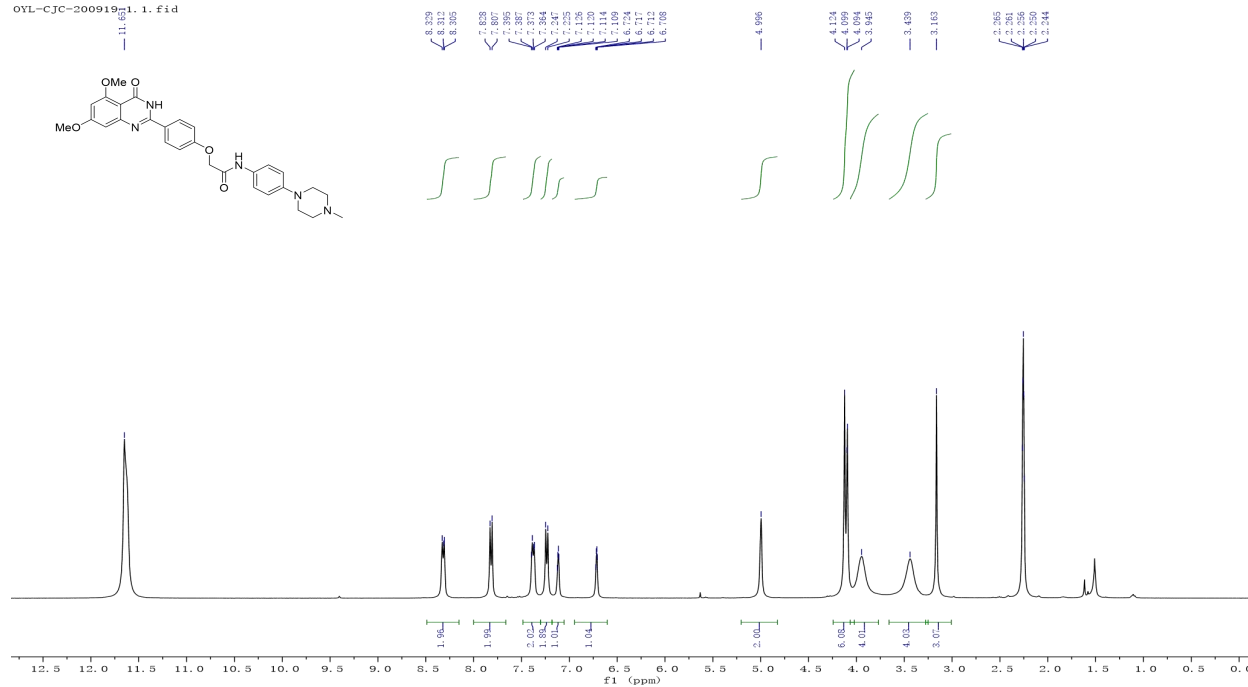

<sup>1</sup>H NMR Spectrum of Compound 43f

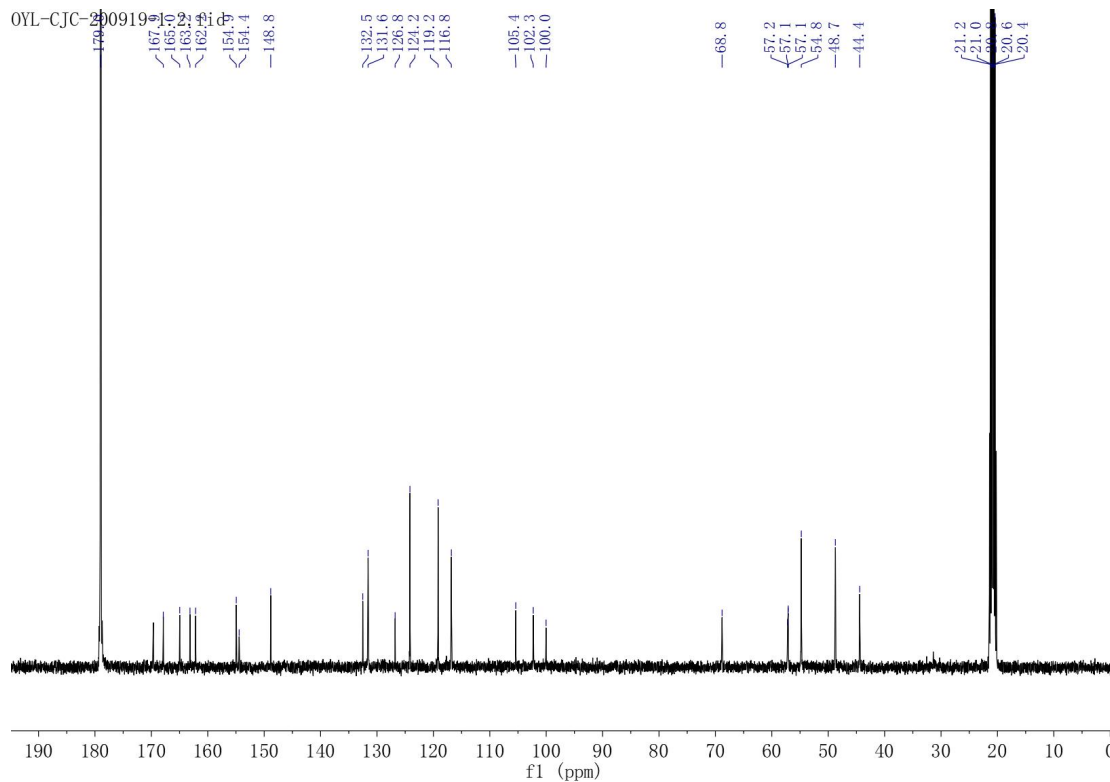

<sup>13</sup>C NMR Spectrum of Compound 43f

# 43g

0VL-CJC-210424-1.1.fid

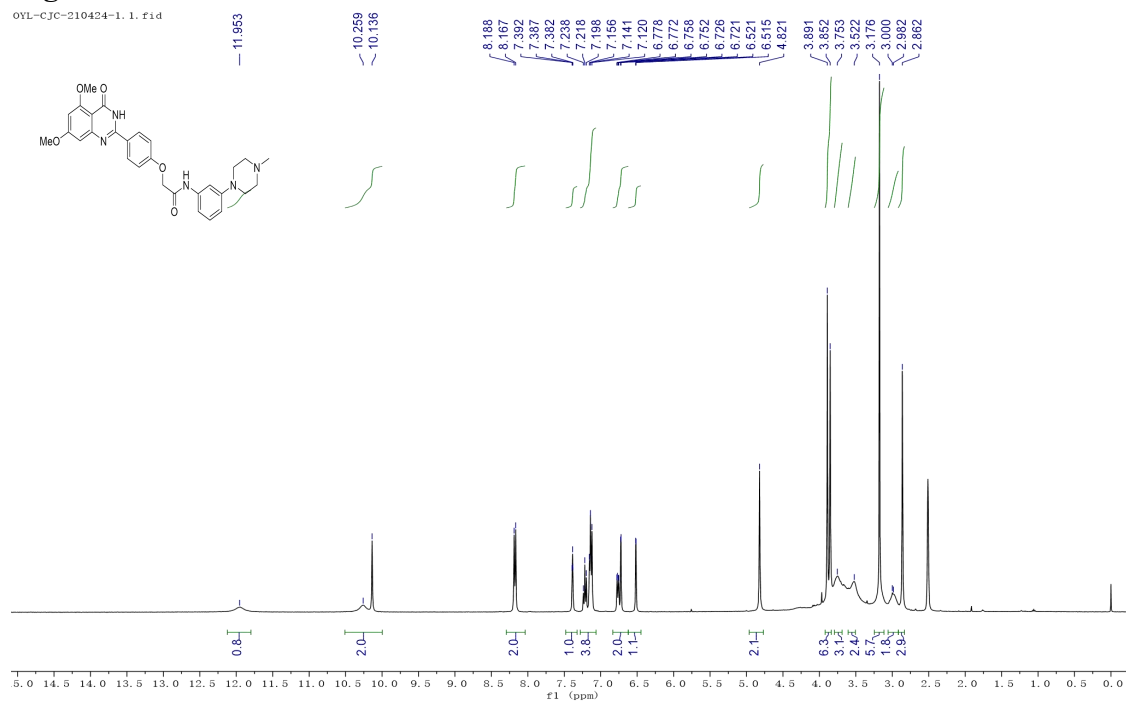

<sup>1</sup>H NMR Spectrum of Compound 43g

0VL-CJC-210416-2.2.fid

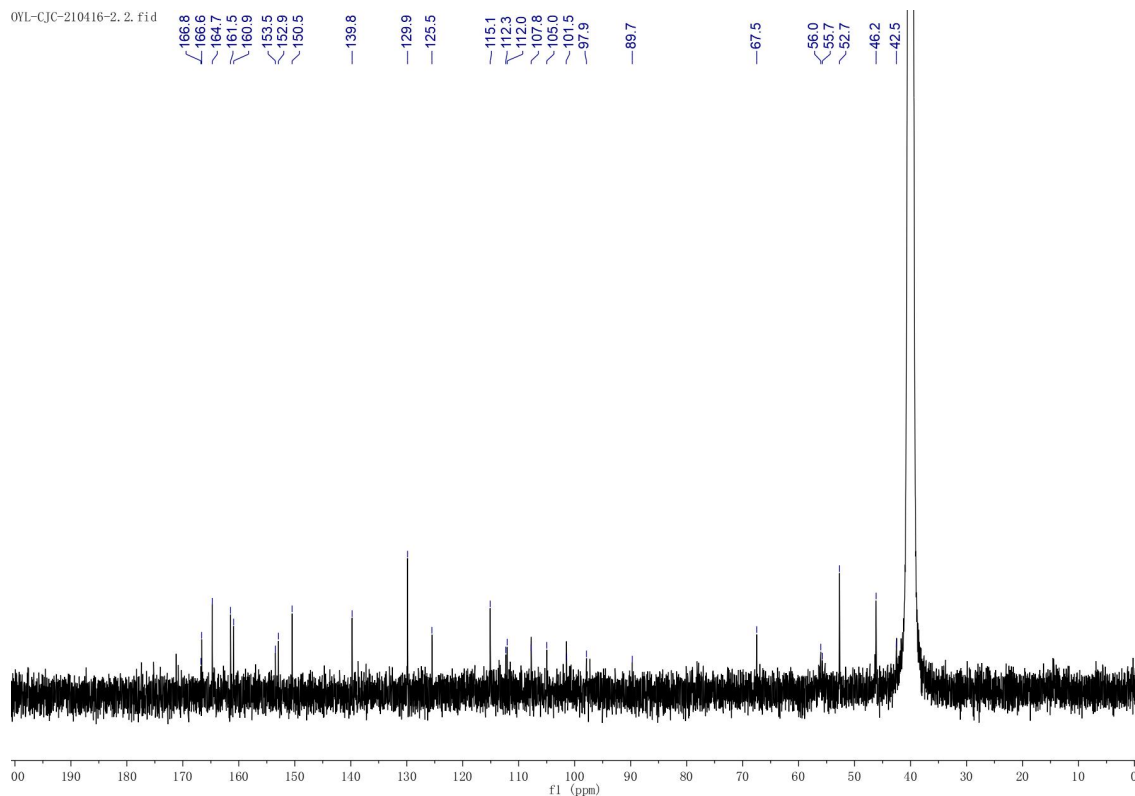

<sup>13</sup>C NMR Spectrum of Compound 43g

# 43h

OVL-CJC-210510-1.1.fid

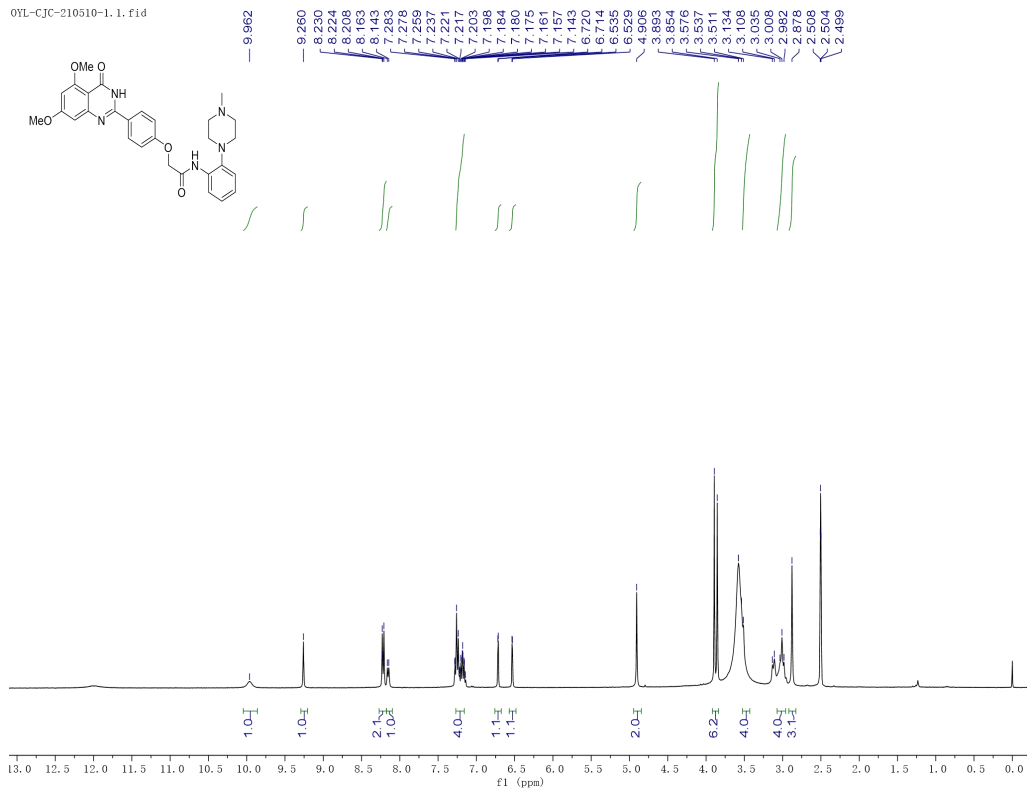

<sup>1</sup>H NMR Spectrum of Compound 43h

OVL-CJC-210510-1C.1.fid

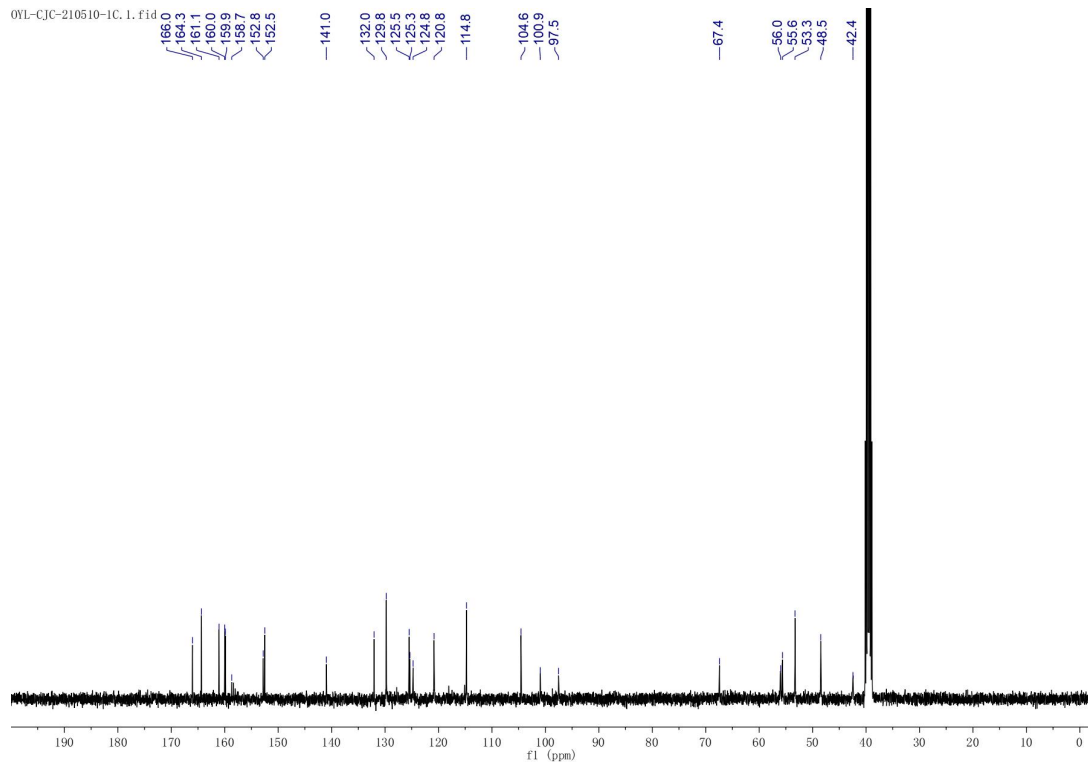

<sup>13</sup>C NMR Spectrum of Compound 43h

43i

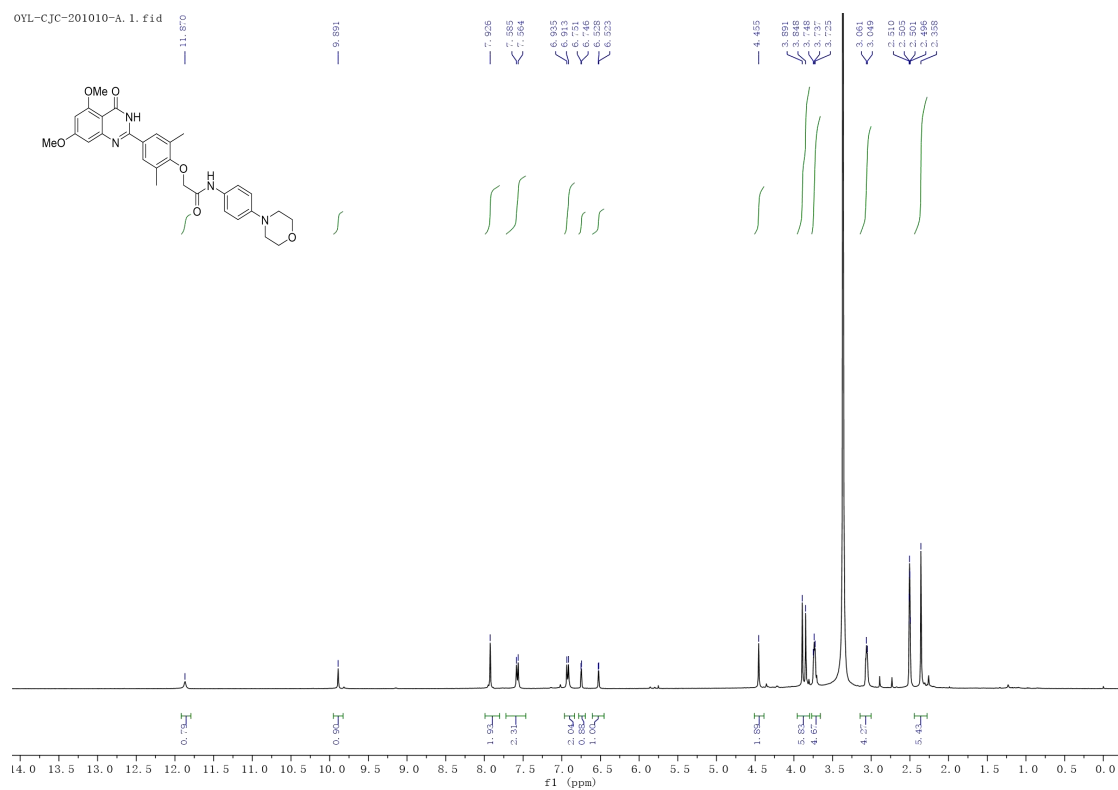

<sup>1</sup>H NMR Spectrum of Compound 43i

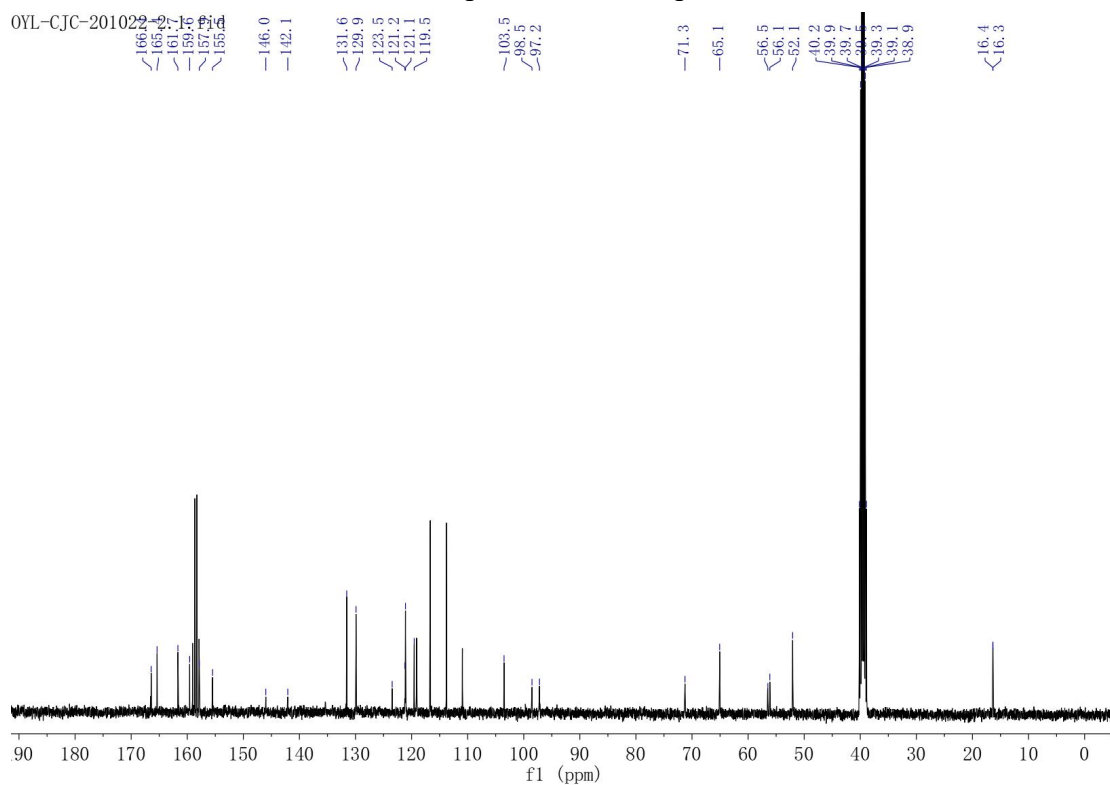

<sup>13</sup>C NMR Spectrum of Compound 43i

43j

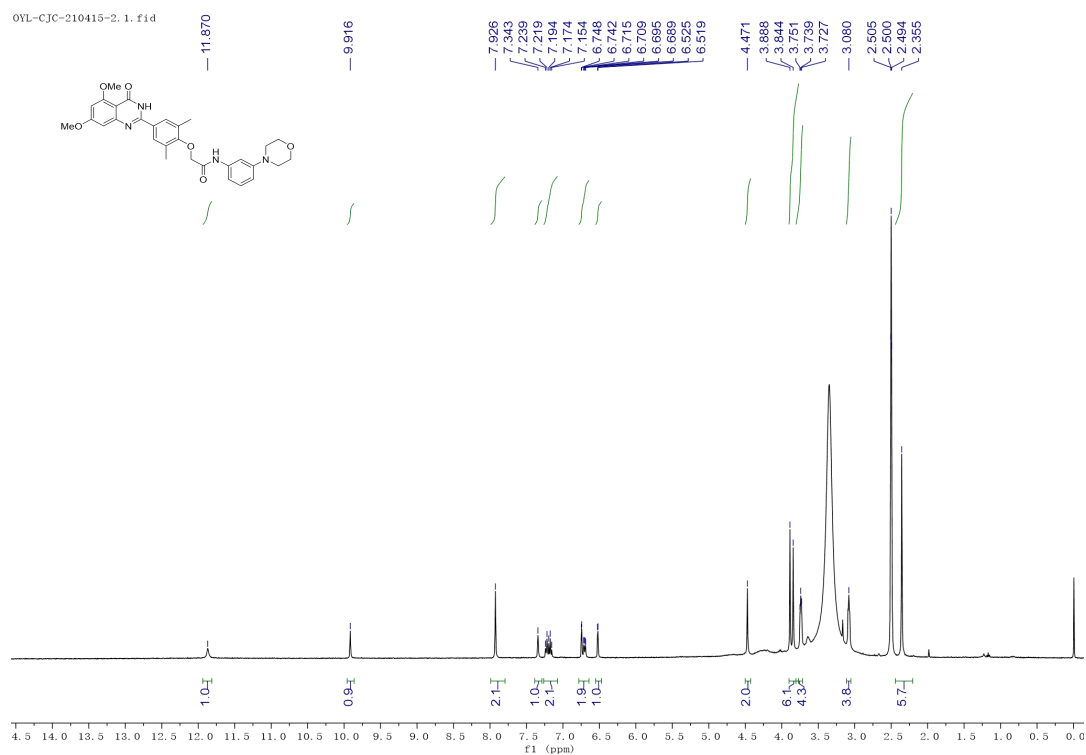

<sup>1</sup>H NMR Spectrum of Compound 43j

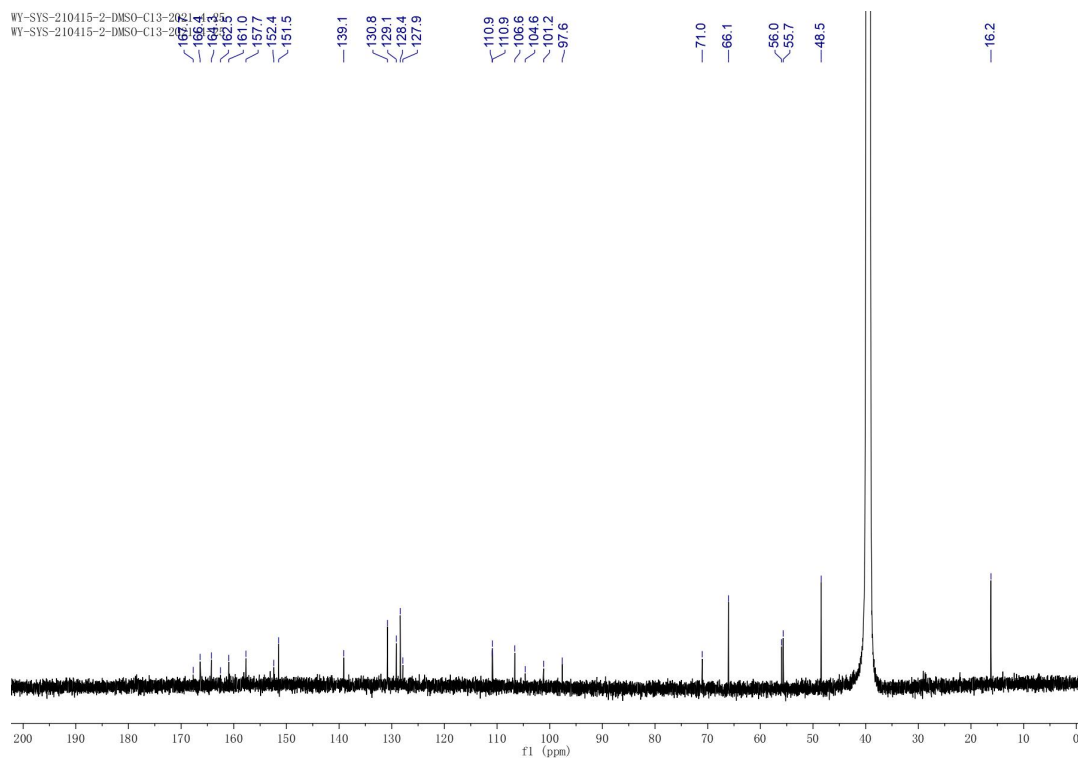

<sup>13</sup>C NMR Spectrum of Compound 43j

43k

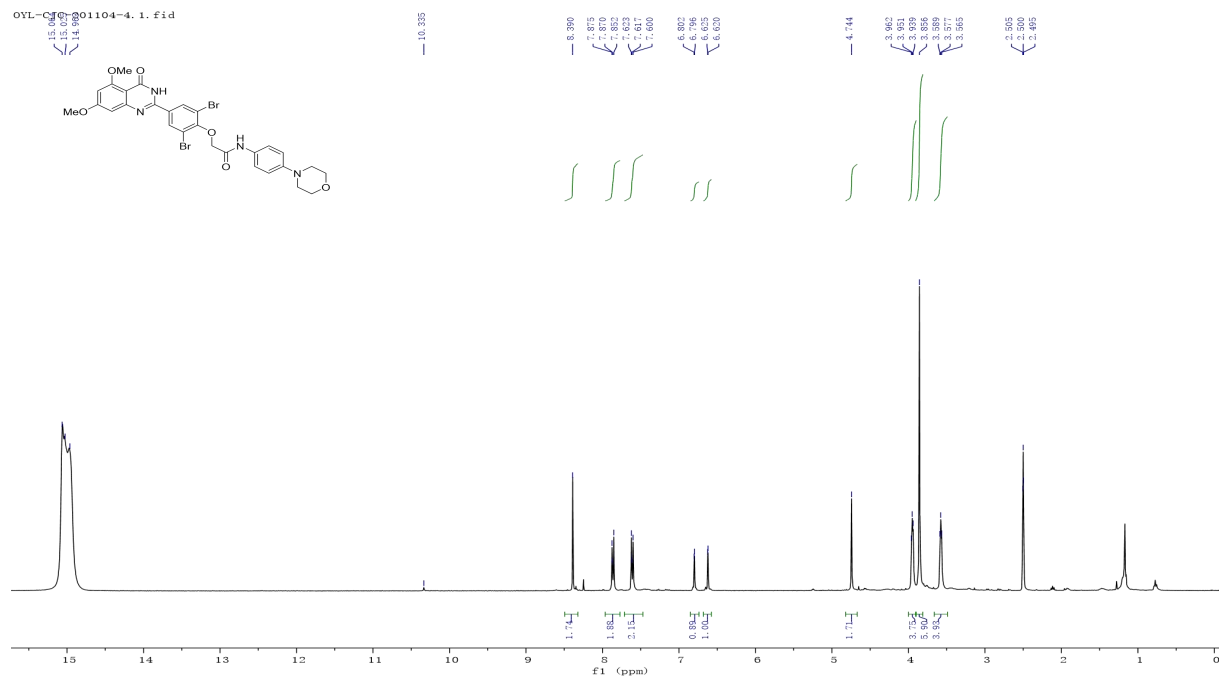

<sup>1</sup>H NMR Spectrum of Compound 43k

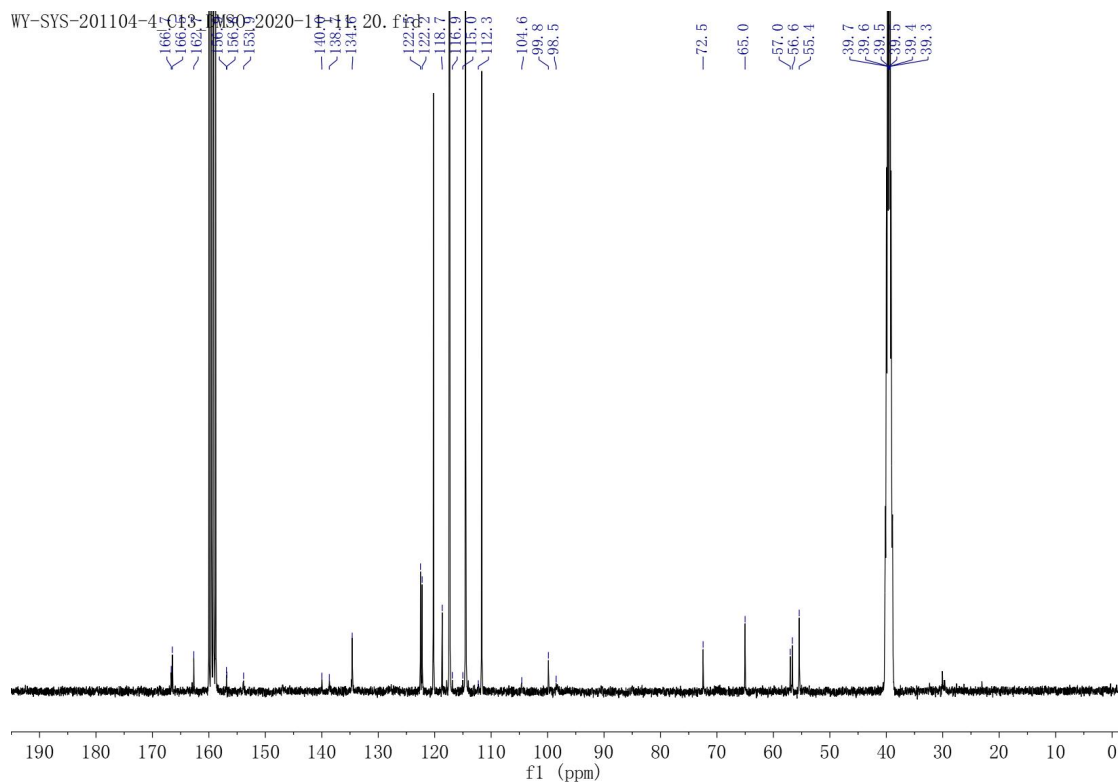

<sup>13</sup>C NMR Spectrum of Compound 43k

431

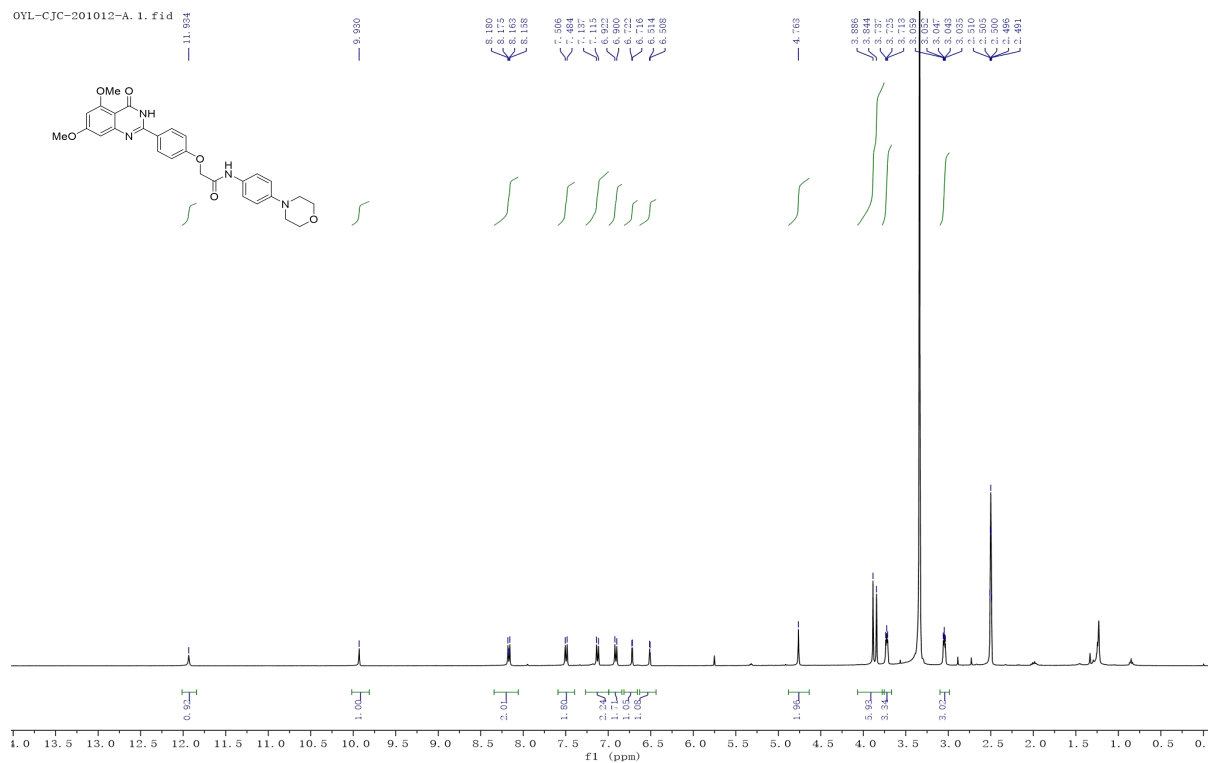

<sup>1</sup>H NMR Spectrum of Compound 431

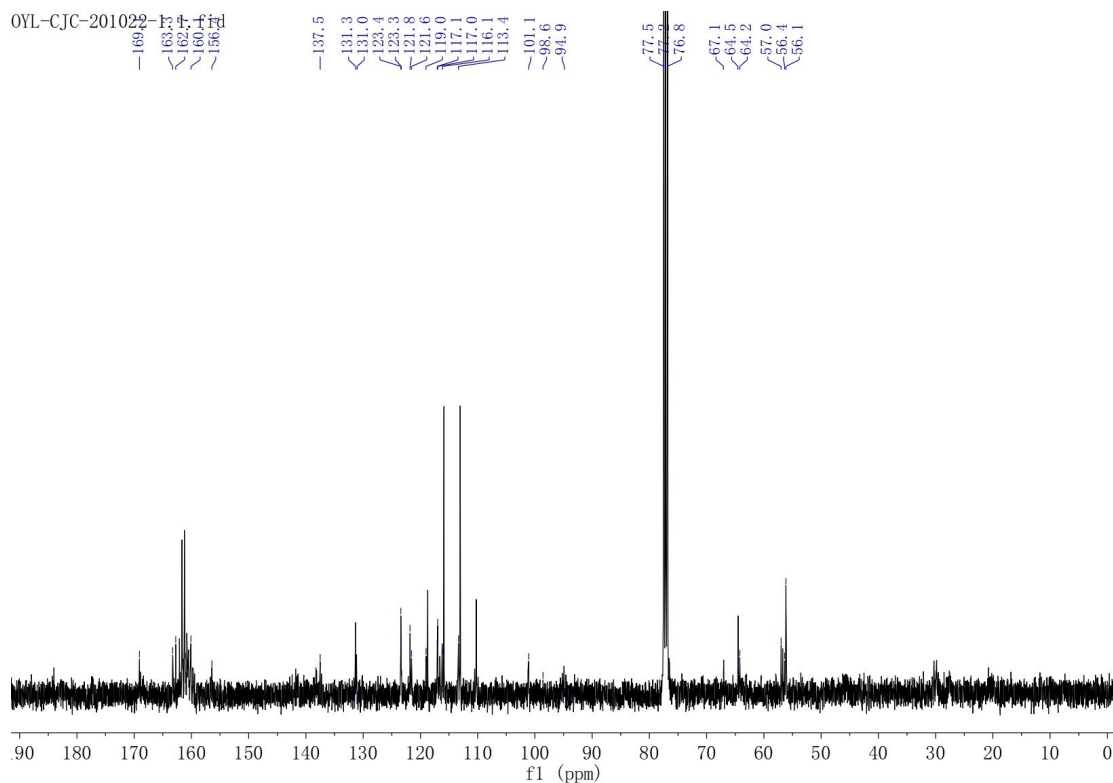

<sup>13</sup>C NMR Spectrum of Compound 431



# 43m

OVL-CJC-210424-2.1.fid

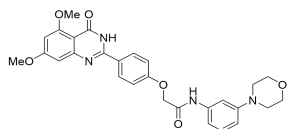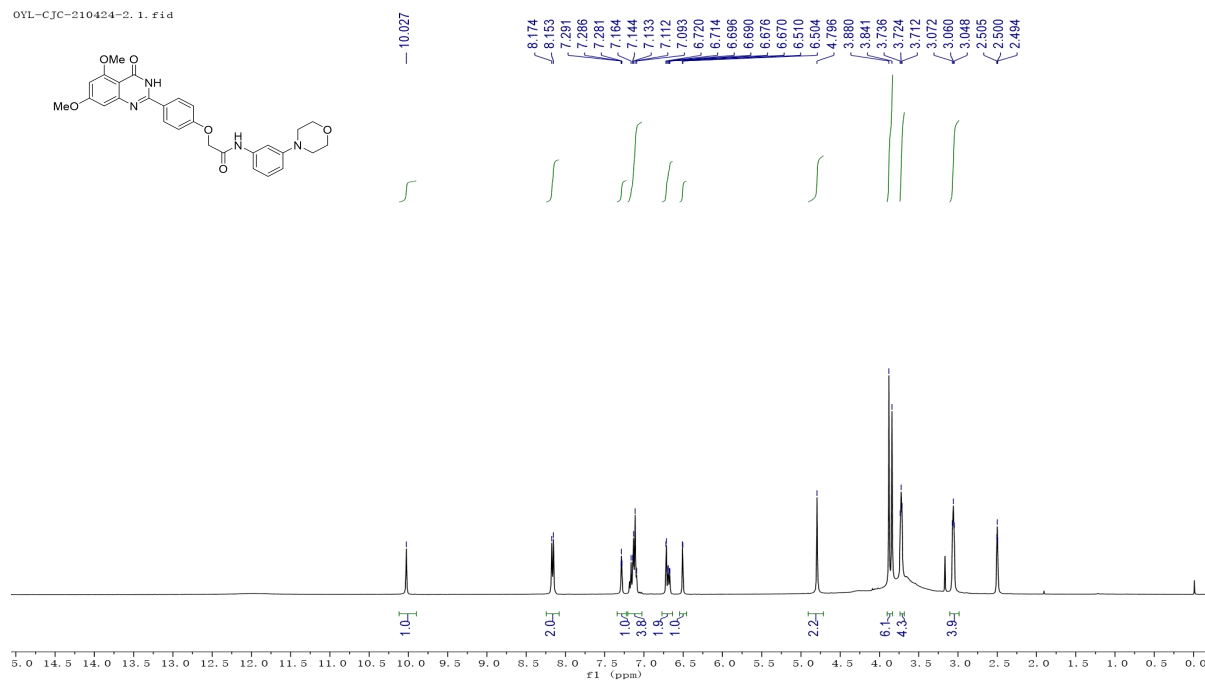

## <sup>1</sup>H NMR Spectrum of Compound 43m

OVL-CJC-210424-2.2.fid

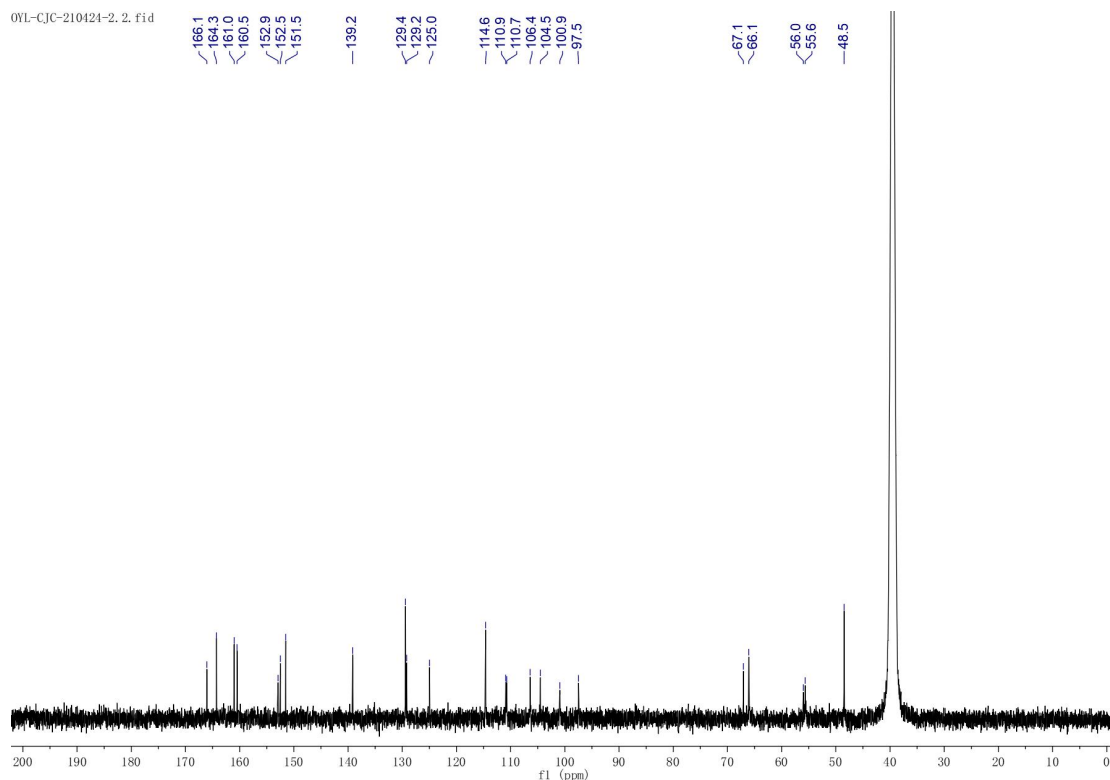

## <sup>13</sup>C NMR Spectrum of Compound 43m

# 43n

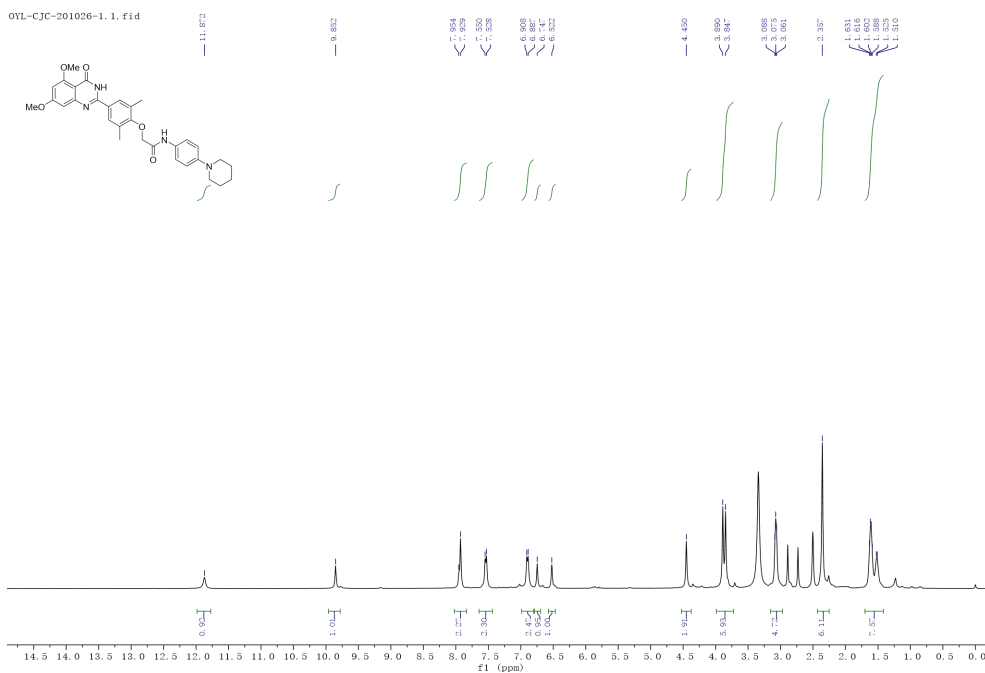

## <sup>1</sup>H NMR Spectrum of Compound 43n

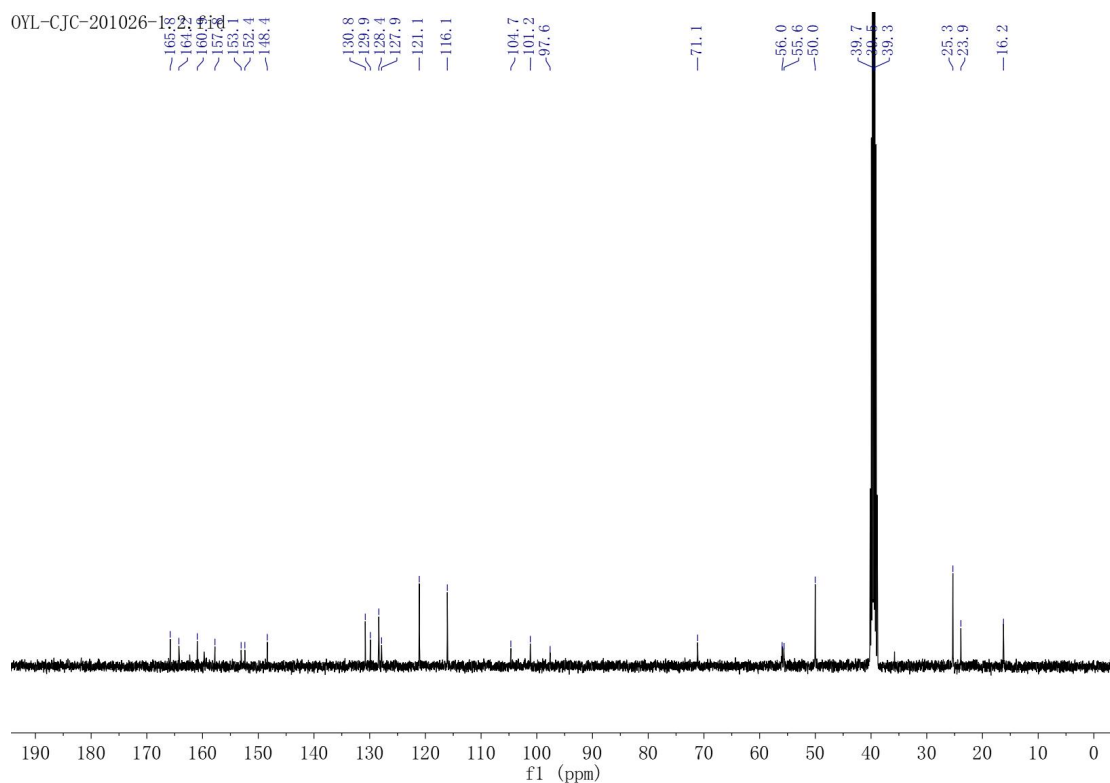

## <sup>13</sup>C NMR Spectrum of Compound 43n

# 43o

0YL-CJC-201107-1.1.fid

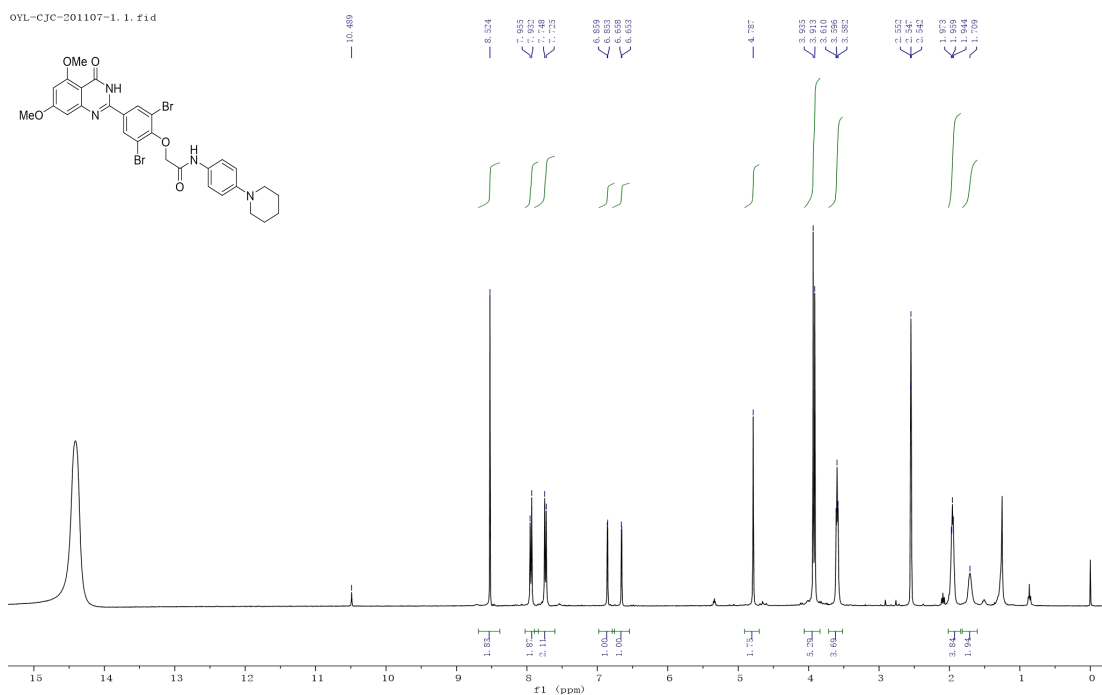

<sup>1</sup>H NMR Spectrum of Compound 43o

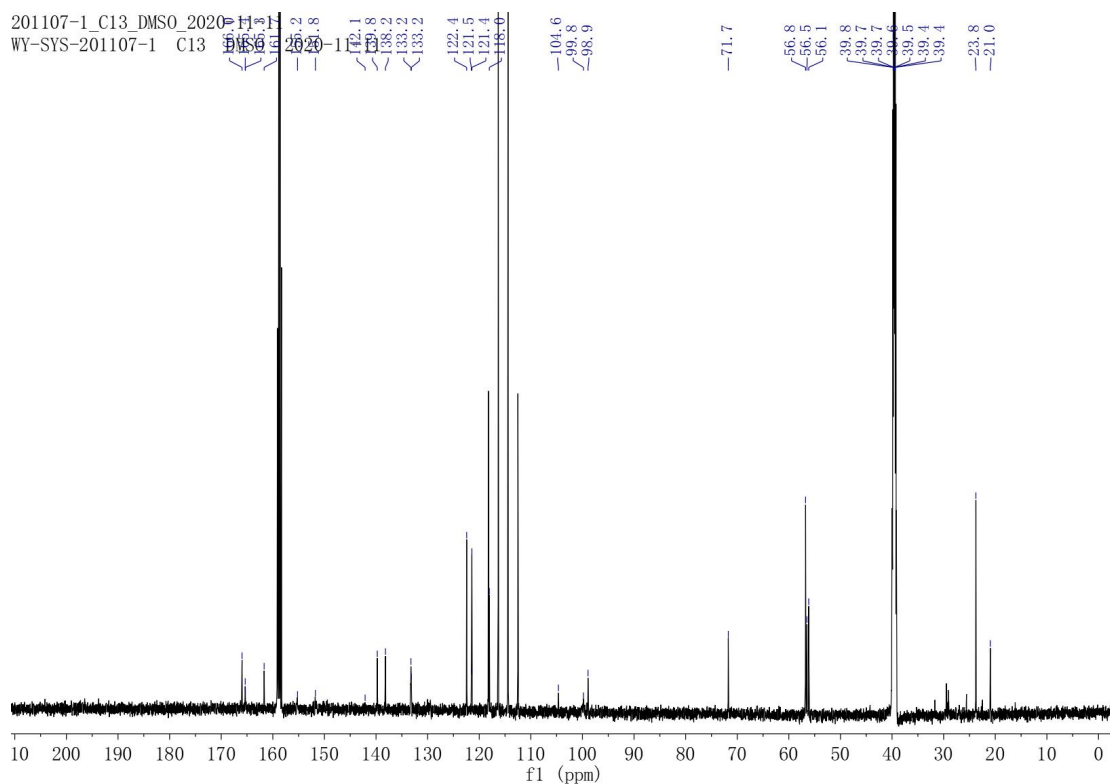

<sup>13</sup>C NMR Spectrum of Compound 43o

# 43p

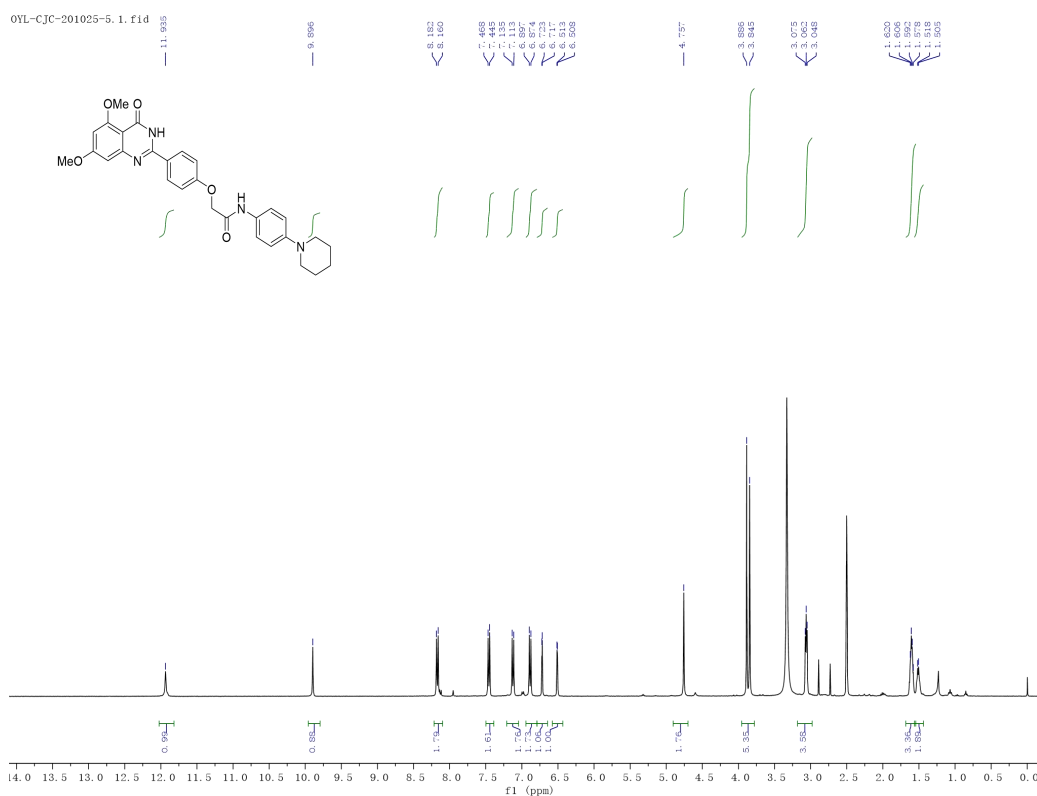

<sup>1</sup>H NMR Spectrum of Compound 43p

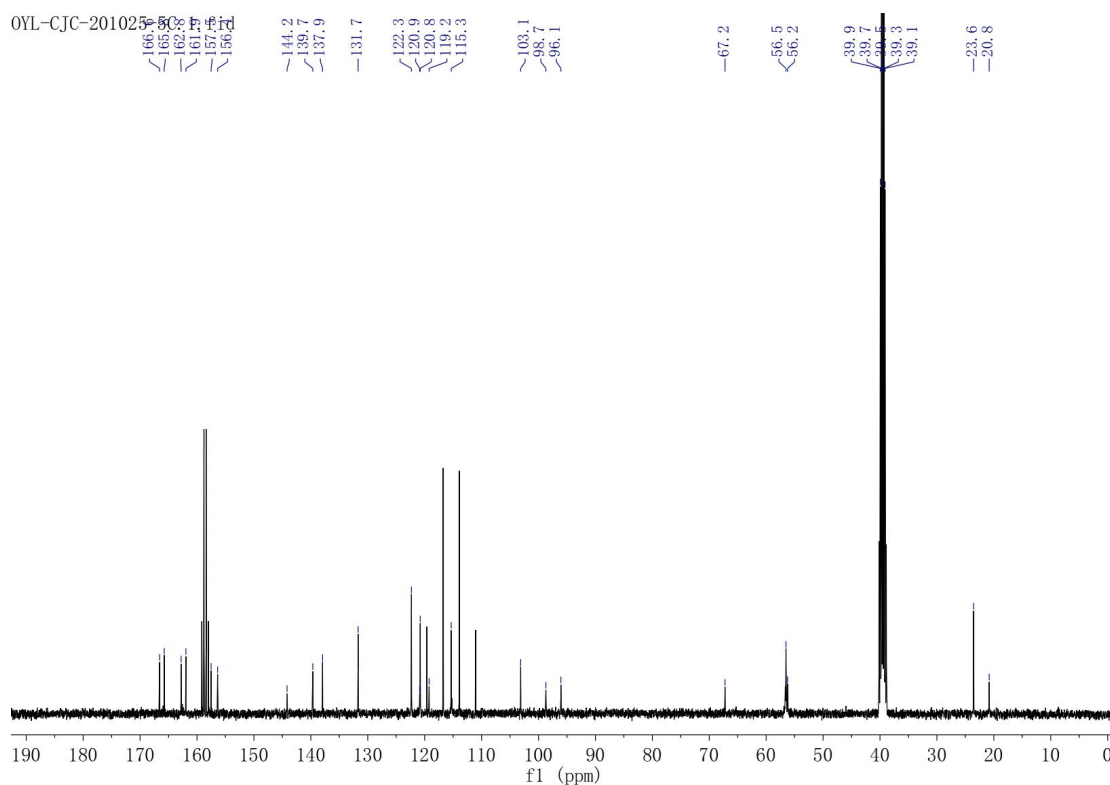

<sup>13</sup>C NMR Spectrum of Compound 43p

# 43q

OYL-CJC-201030-2.1.fid

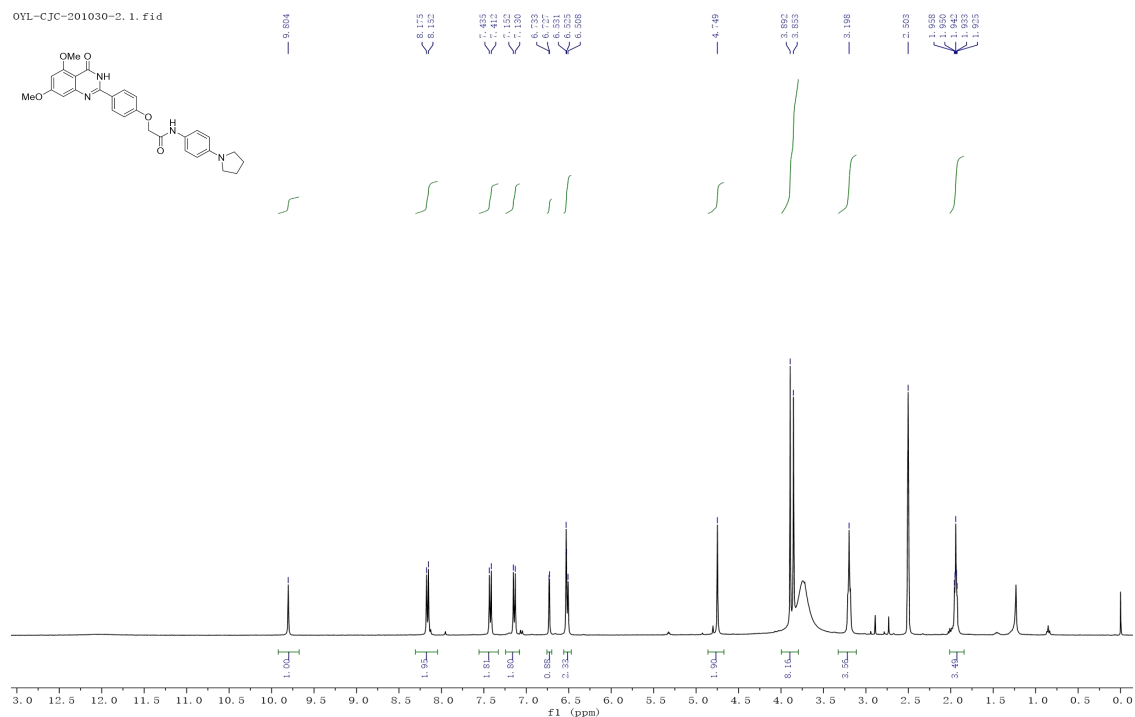

## <sup>1</sup>H NMR Spectrum of Compound 43q

OYL-CJC-201030-2

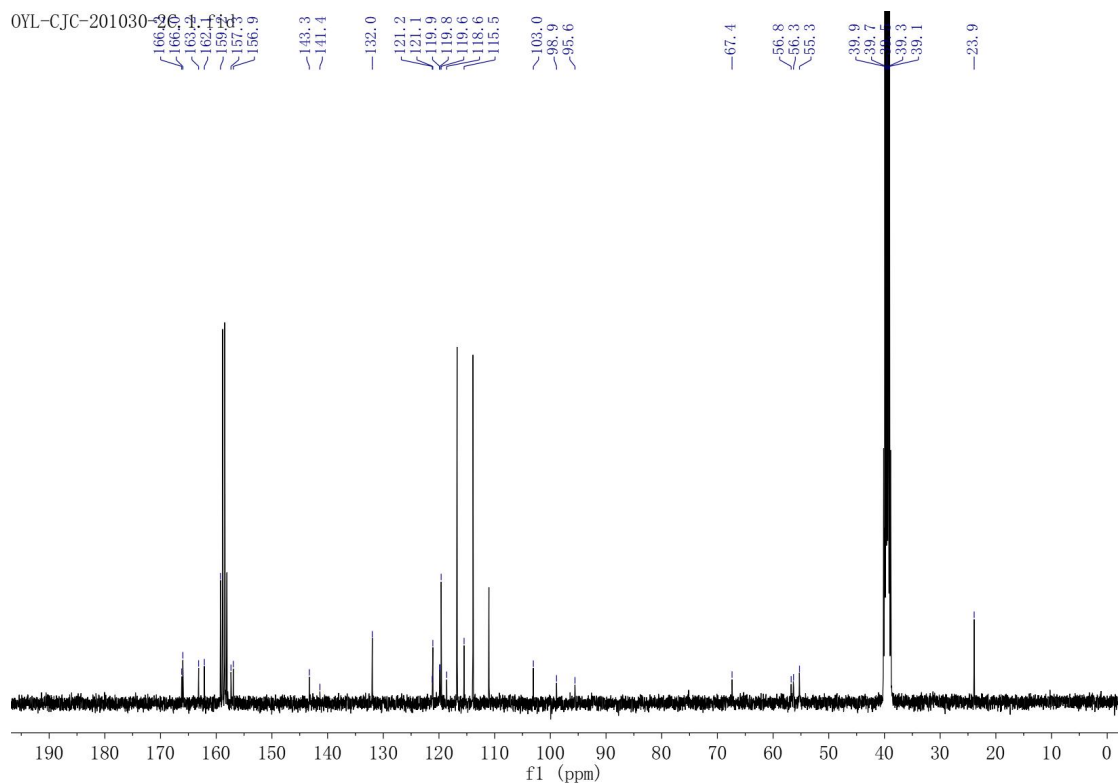

## <sup>13</sup>C NMR Spectrum of Compound 43q

44a

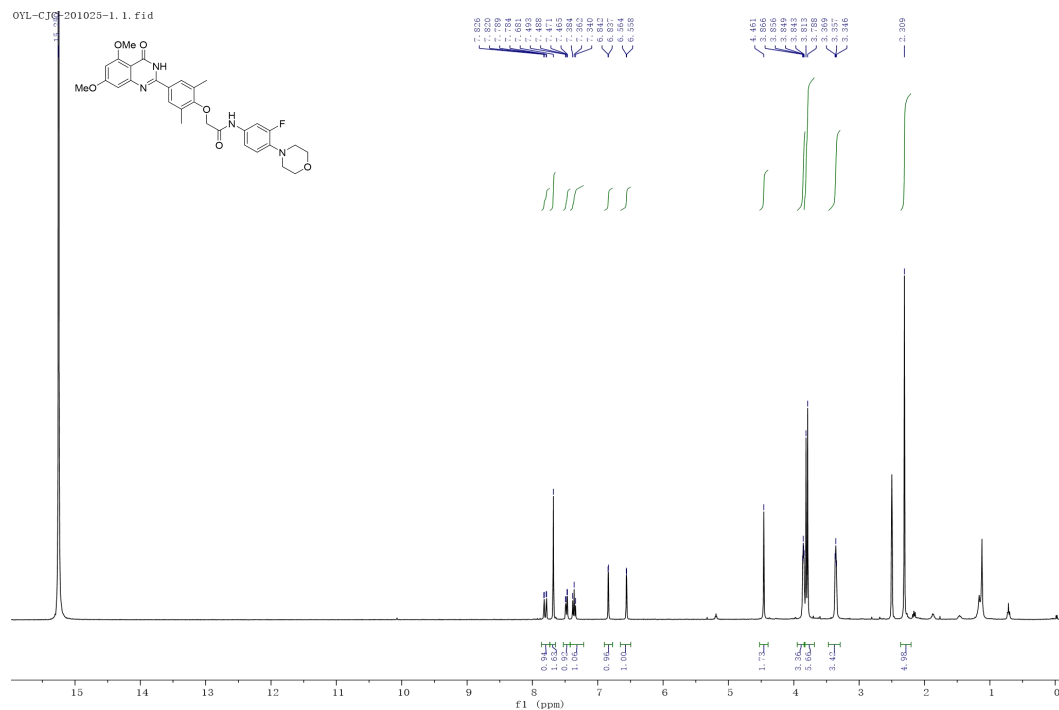

<sup>1</sup>H NMR Spectrum of Compound 44a

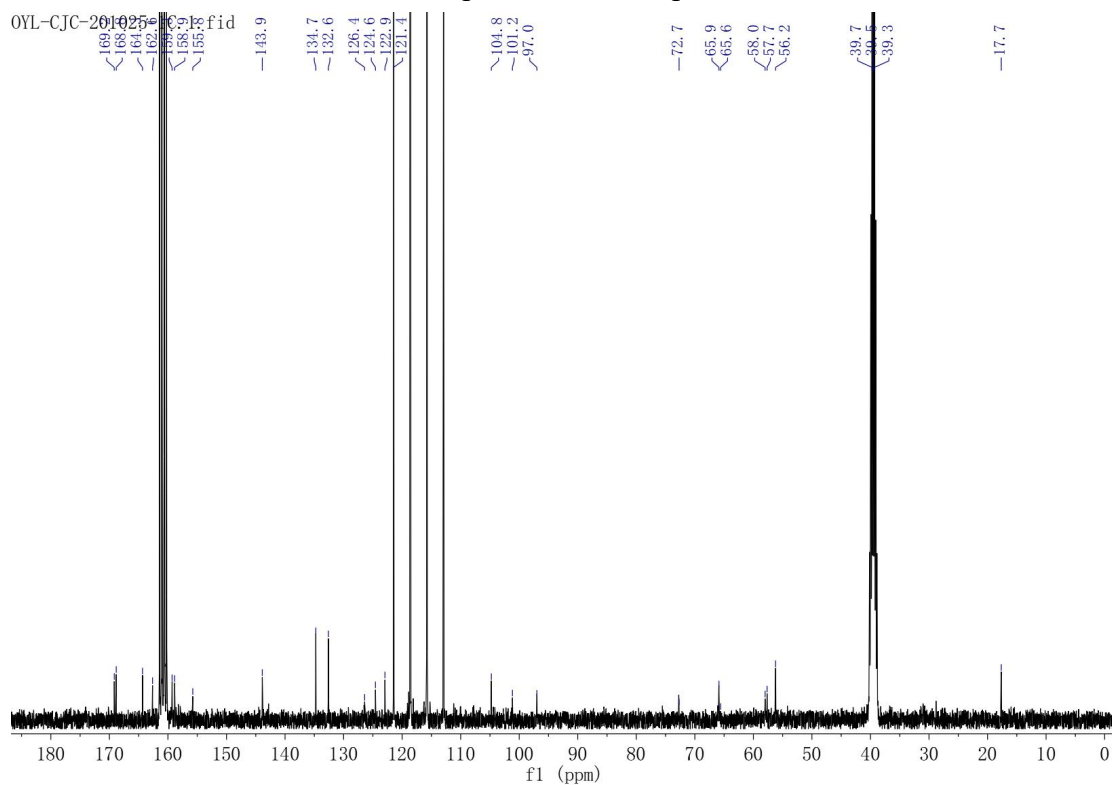

<sup>13</sup>C NMR Spectrum of Compound 44a

# 44b

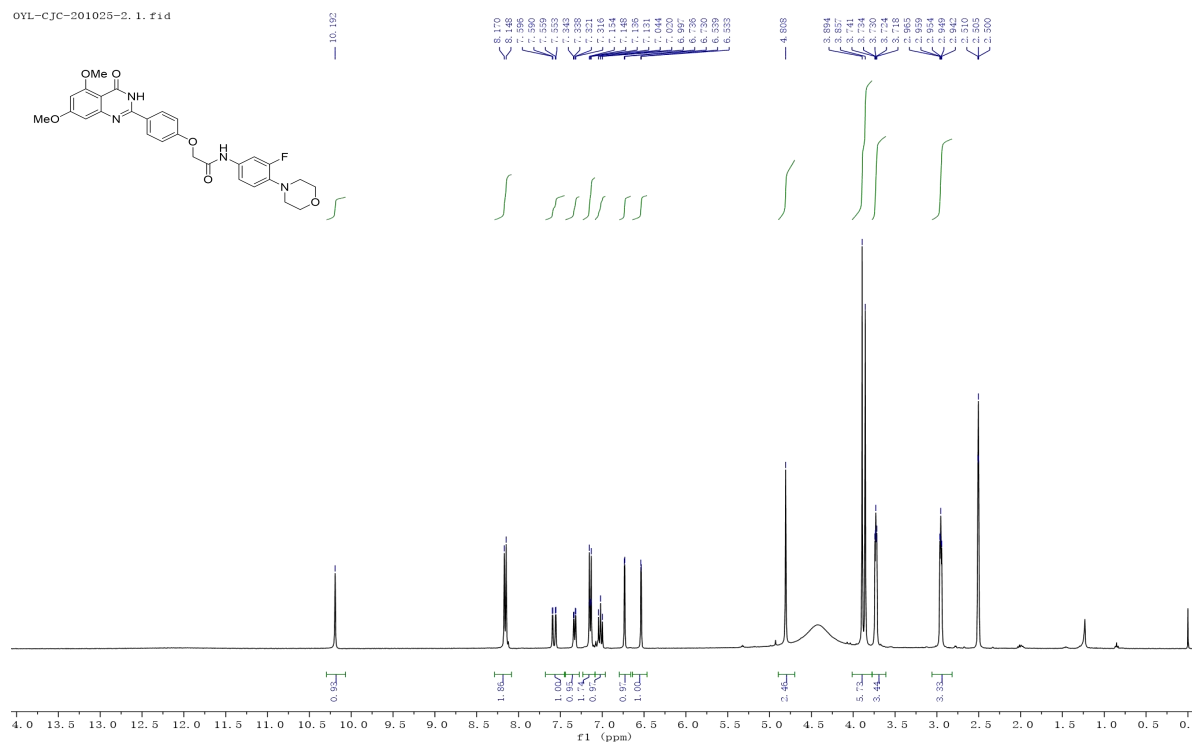

<sup>1</sup>H NMR Spectrum of Compound 44b

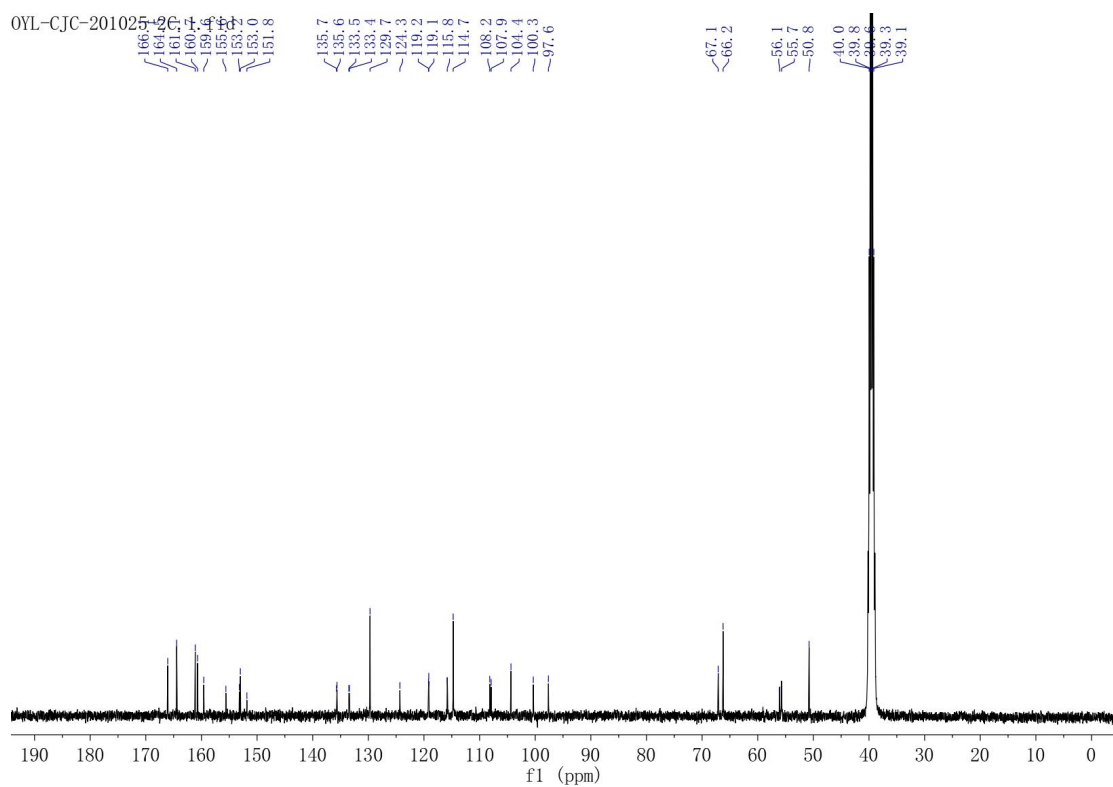

<sup>13</sup>C NMR Spectrum of Compound 44b

# 44c

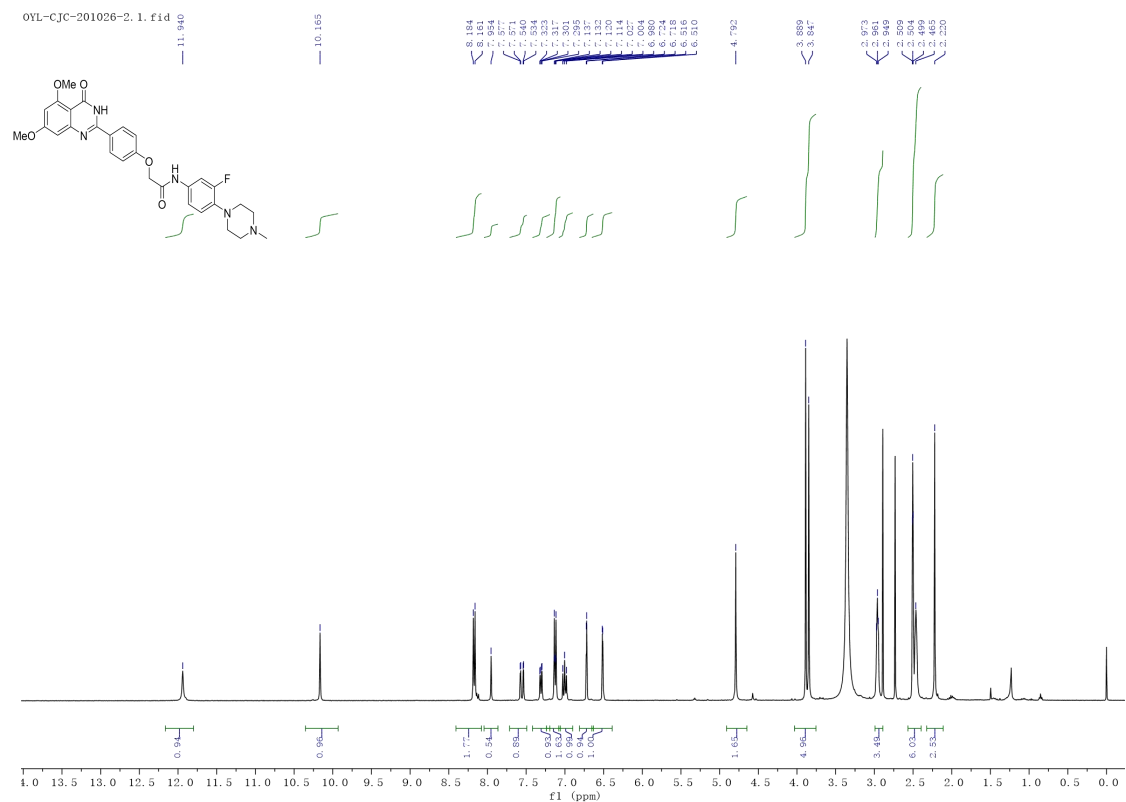

<sup>1</sup>H NMR Spectrum of Compound 44c

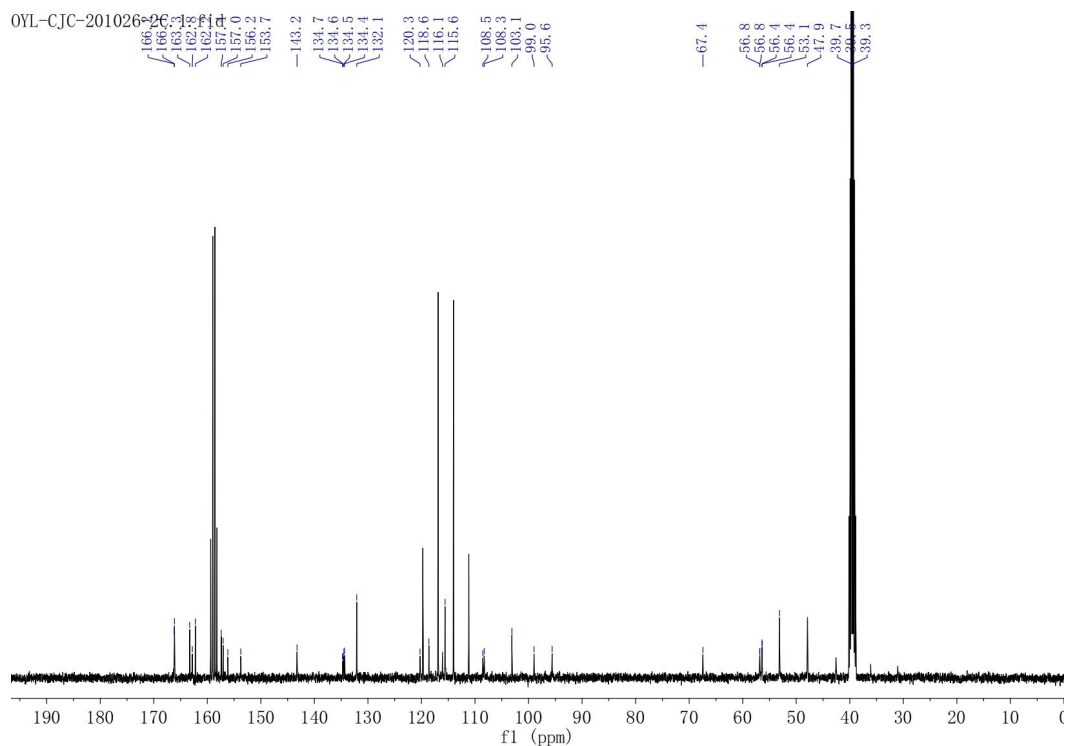

<sup>13</sup>C NMR Spectrum of Compound 44c



# 44d

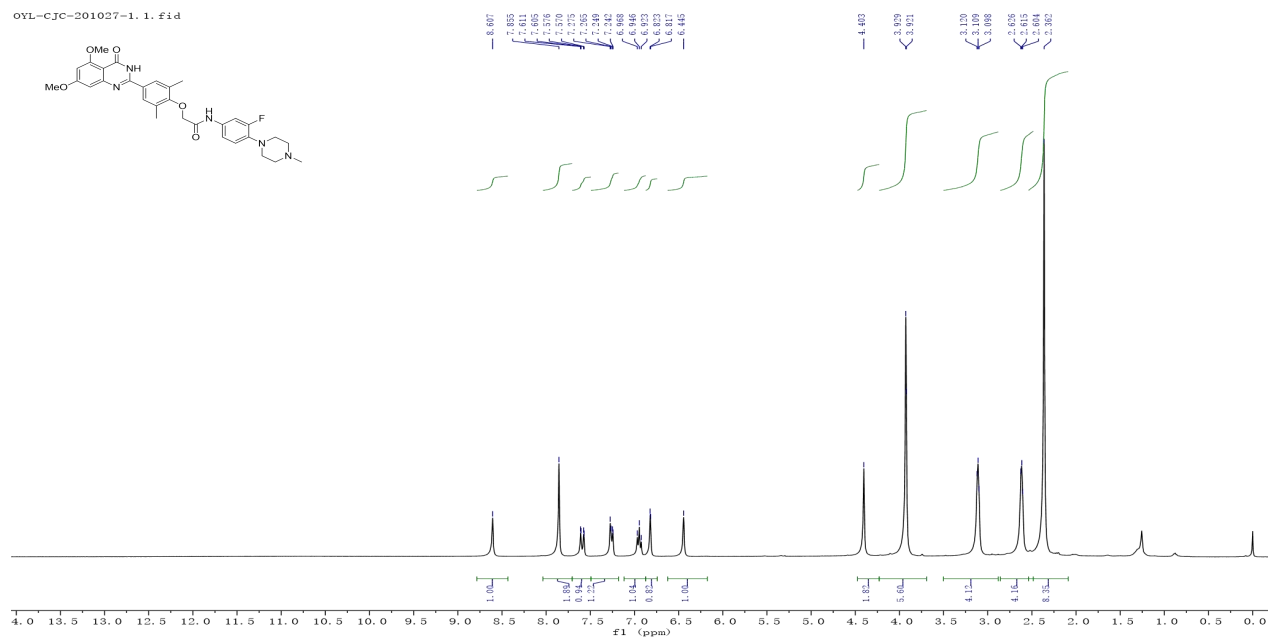

<sup>1</sup>H NMR Spectrum of Compound 44d

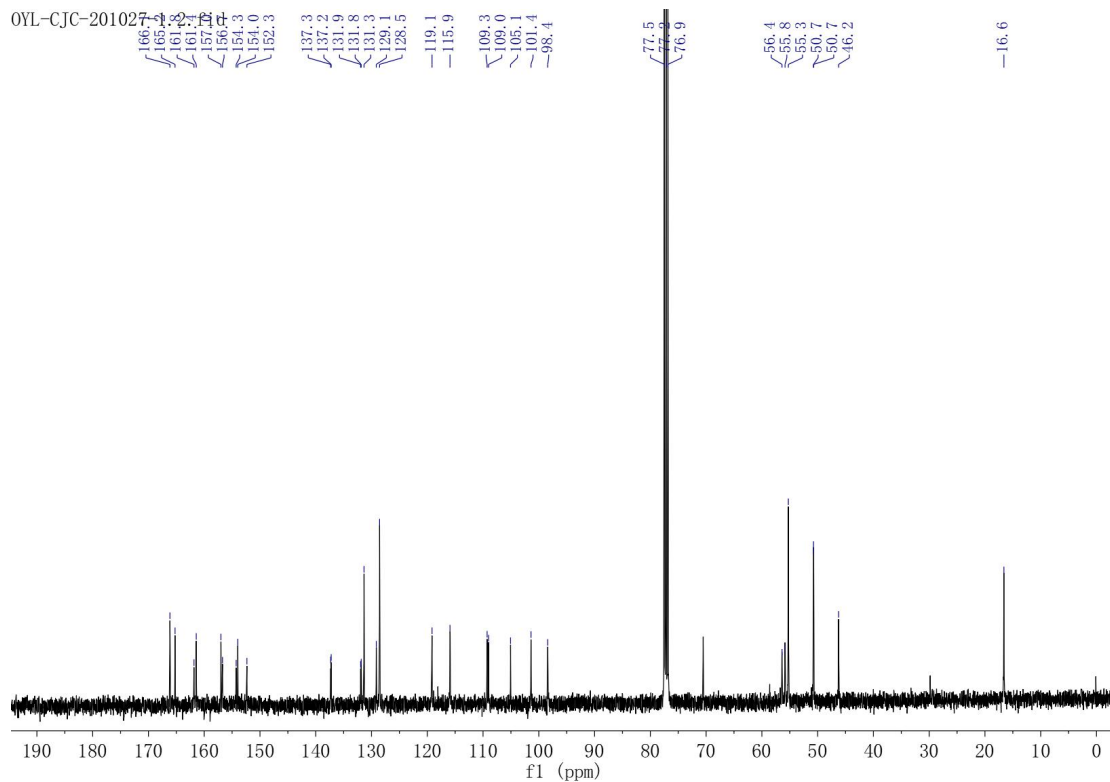

<sup>13</sup>C NMR Spectrum of Compound 44d

44e

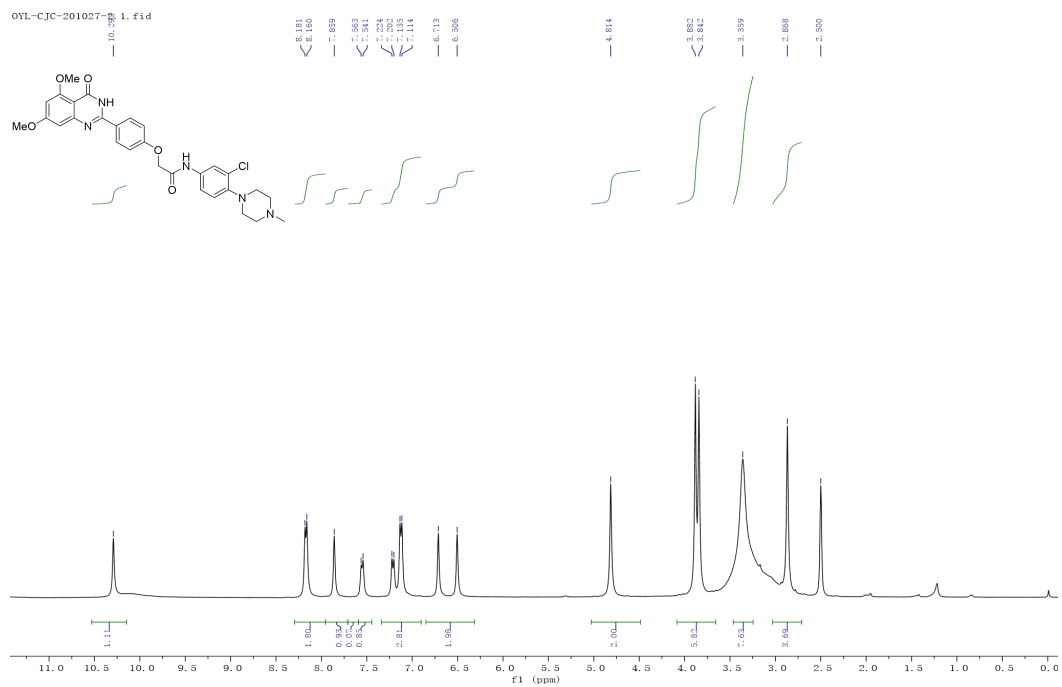

<sup>1</sup>H NMR Spectrum of Compound 44e

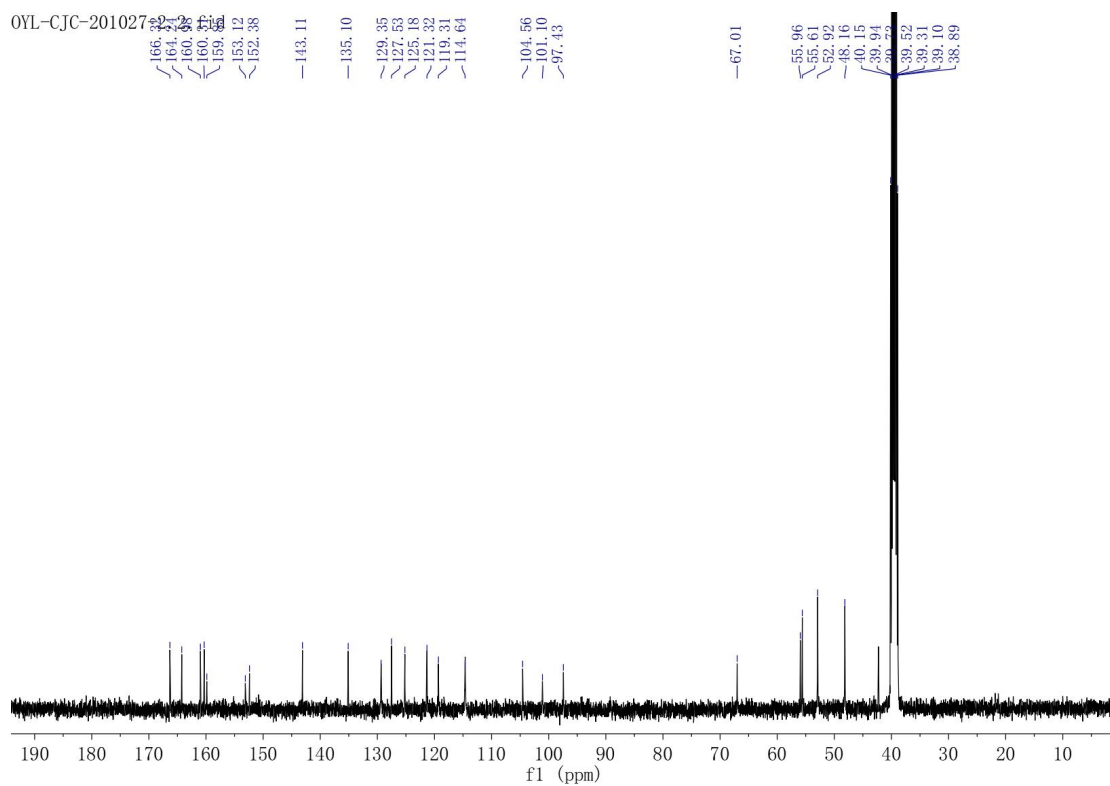

<sup>13</sup>C NMR Spectrum of Compound 44e

# 44f

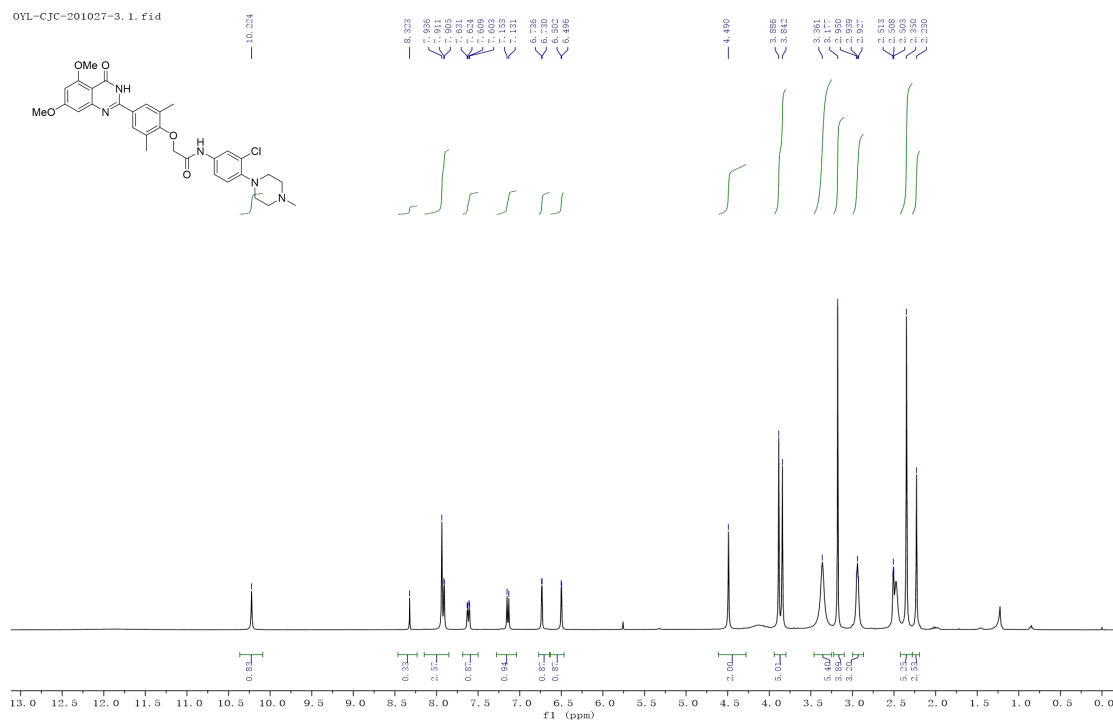

<sup>1</sup>H NMR Spectrum of Compound 44f

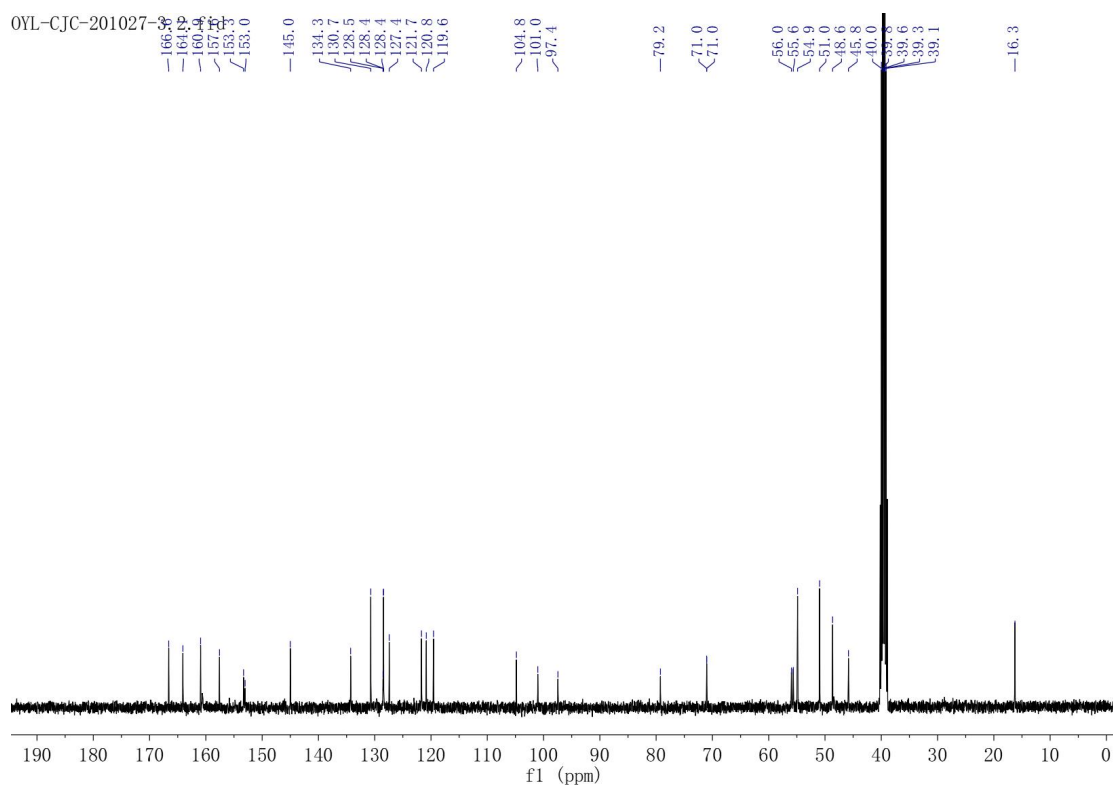

<sup>13</sup>C NMR Spectrum of Compound 44f

44g

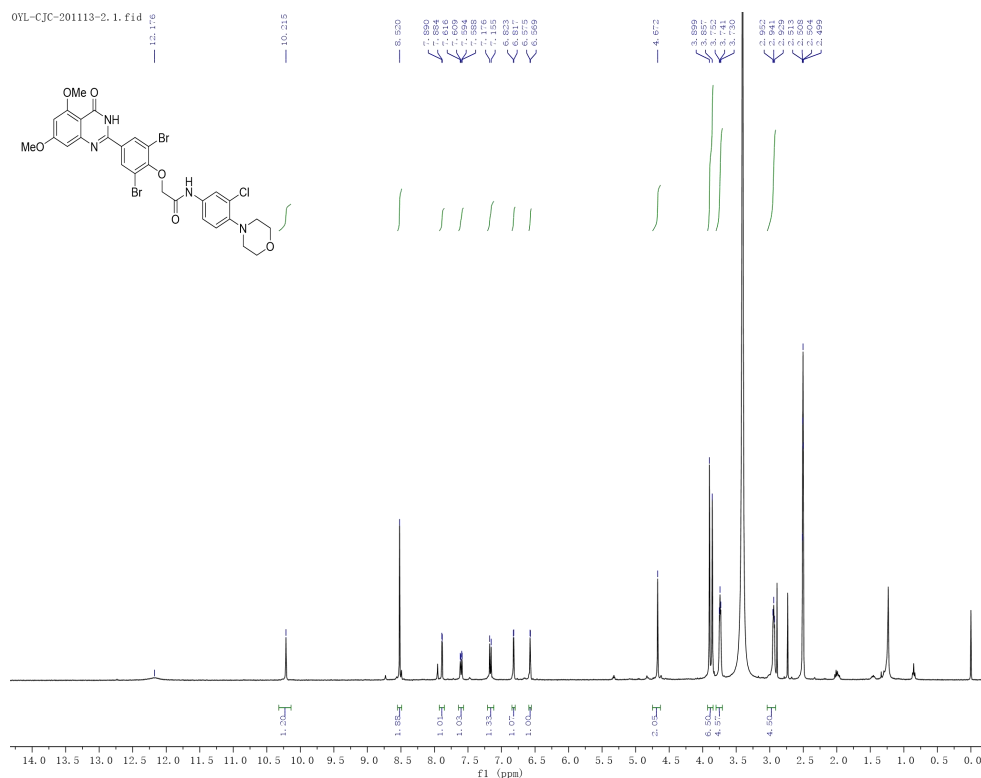

<sup>1</sup>H NMR Spectrum of Compound 44g

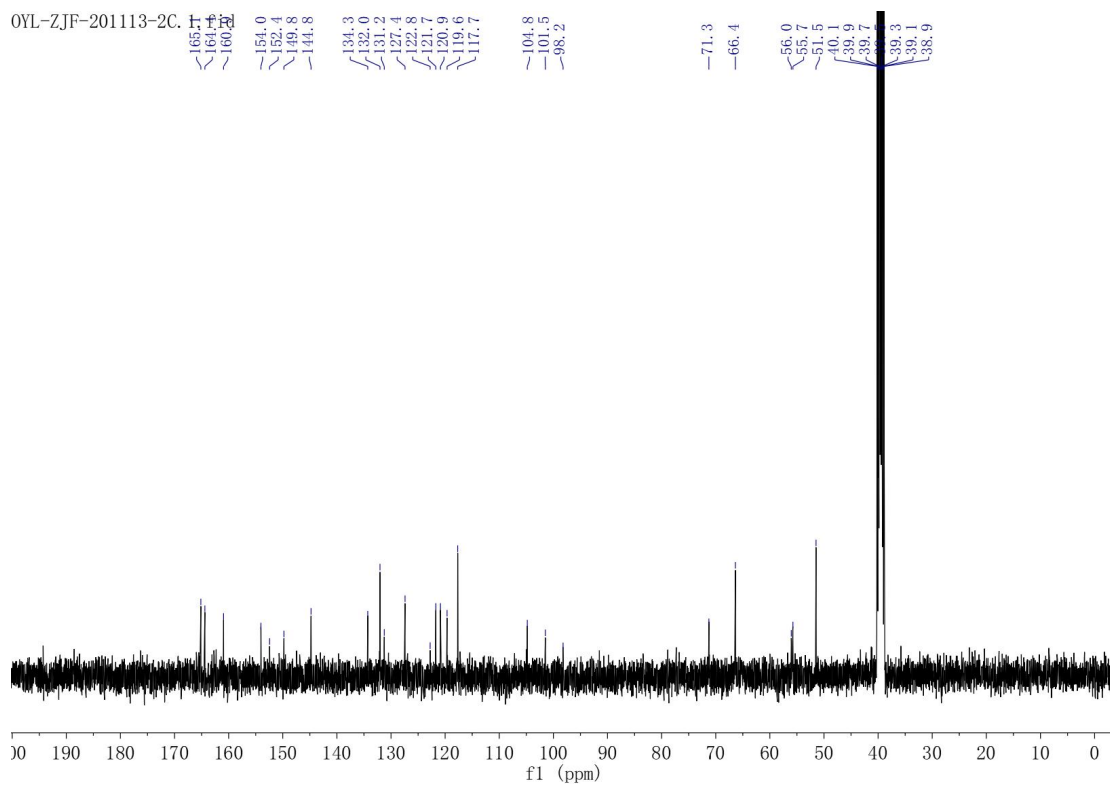

<sup>13</sup>C NMR Spectrum of Compound 44g

# 44h

OYL-CJC-201113-3.1.fid

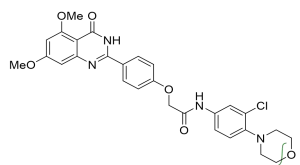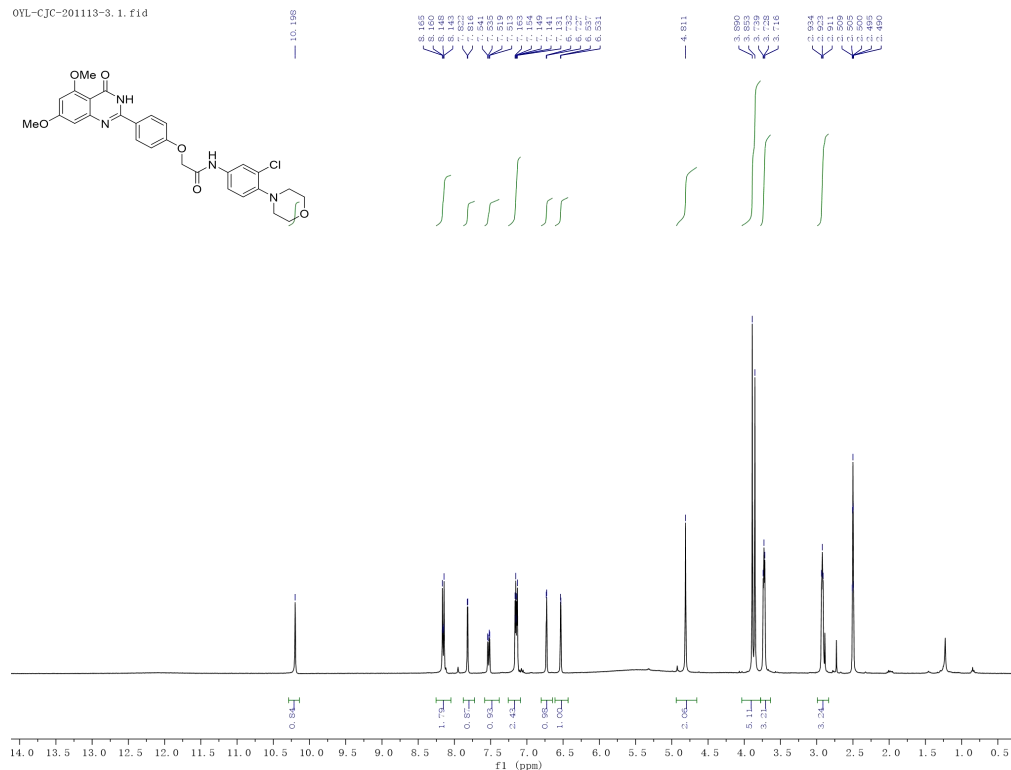

<sup>1</sup>H NMR Spectrum of Compound 44h

OYL-CJC-201113-3C.fid

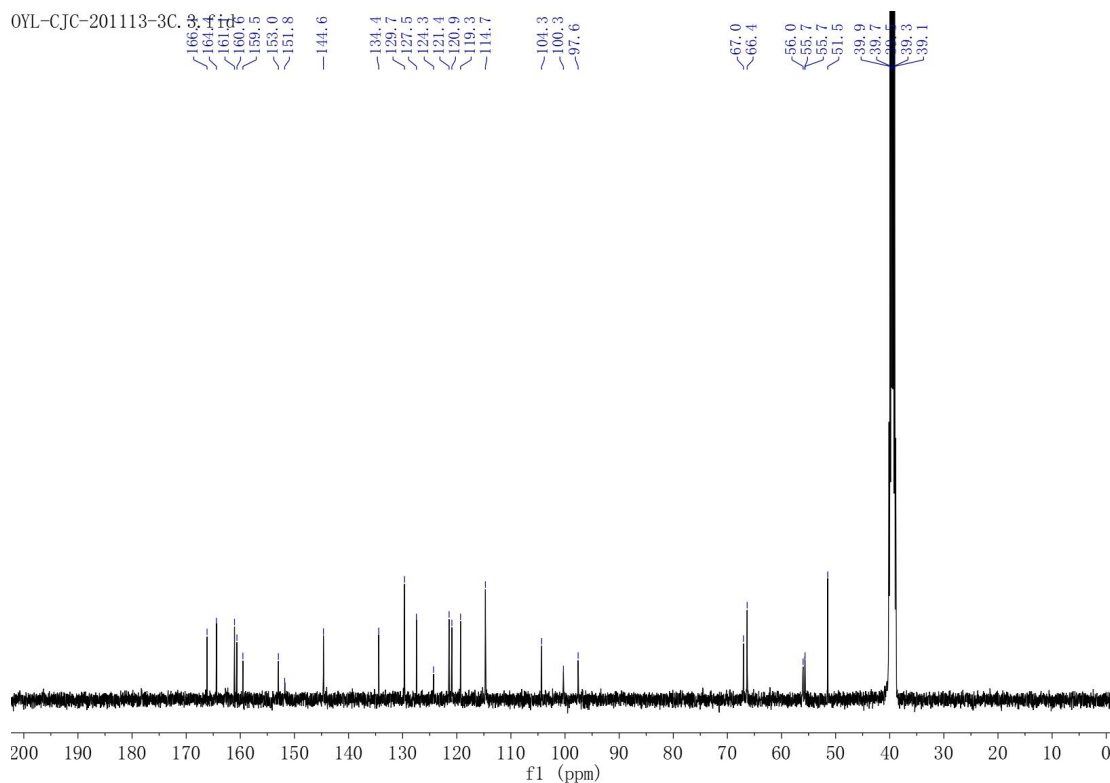

<sup>13</sup>C NMR Spectrum of Compound 44h

44i

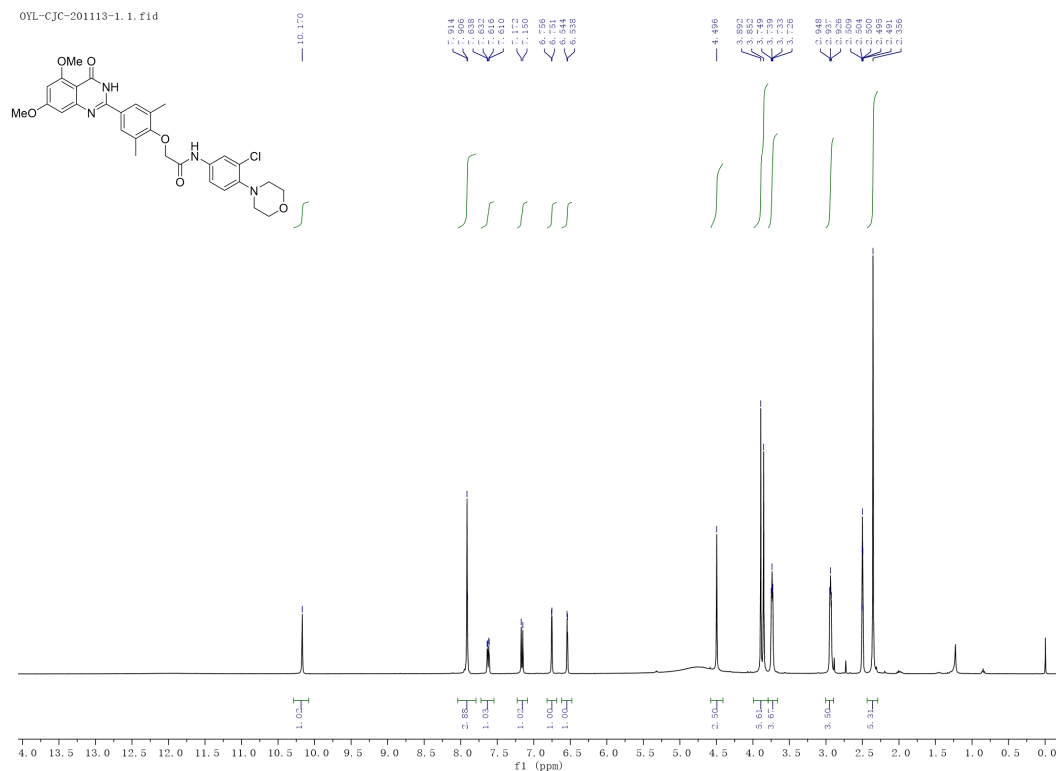

<sup>1</sup>H NMR Spectrum of Compound 44i

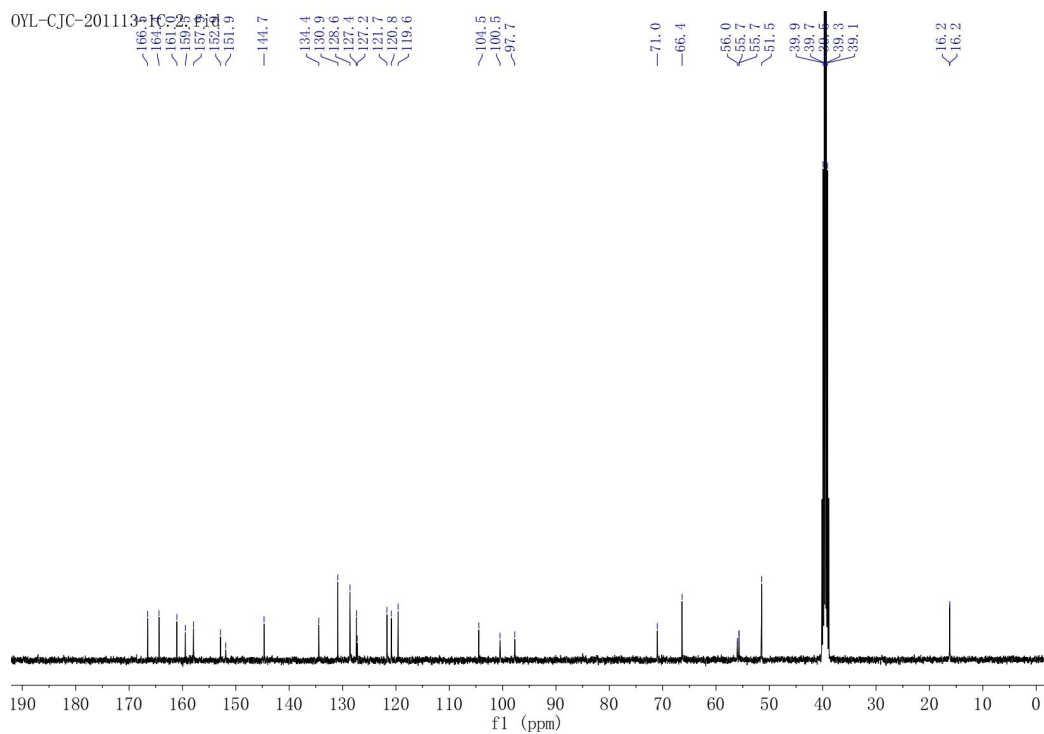

<sup>13</sup>C NMR Spectrum of Compound 44i

# 44j

OYL-CJC-201214-1.1.fid

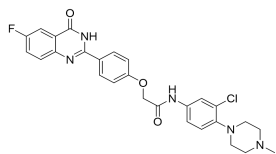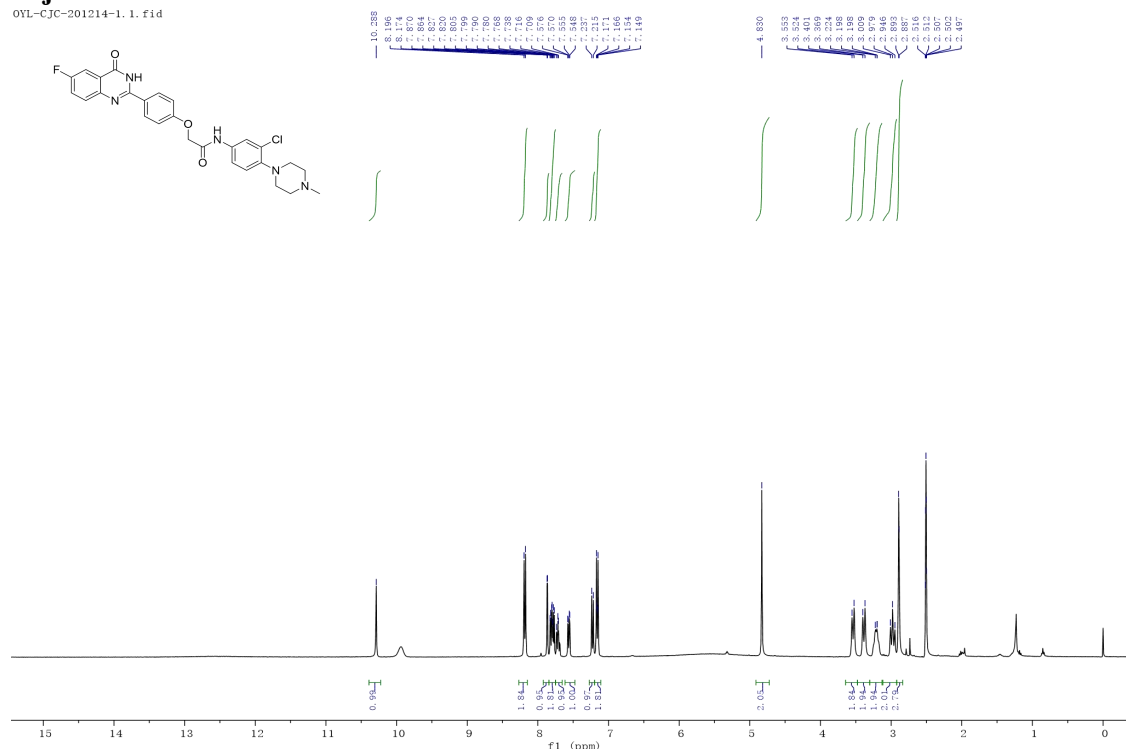

<sup>1</sup>H NMR Spectrum of Compound 44j

OYL-CJC-201214-1C.1.fid

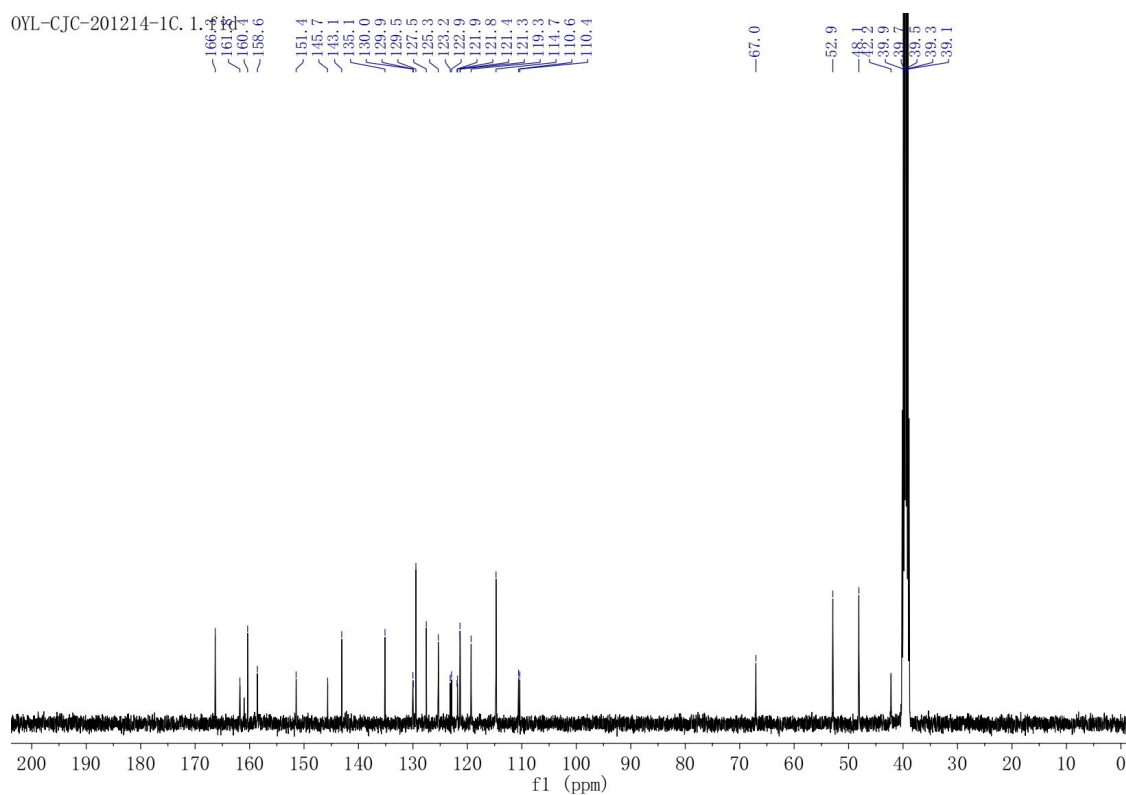

<sup>13</sup>C NMR Spectrum of Compound 44j

**44k**

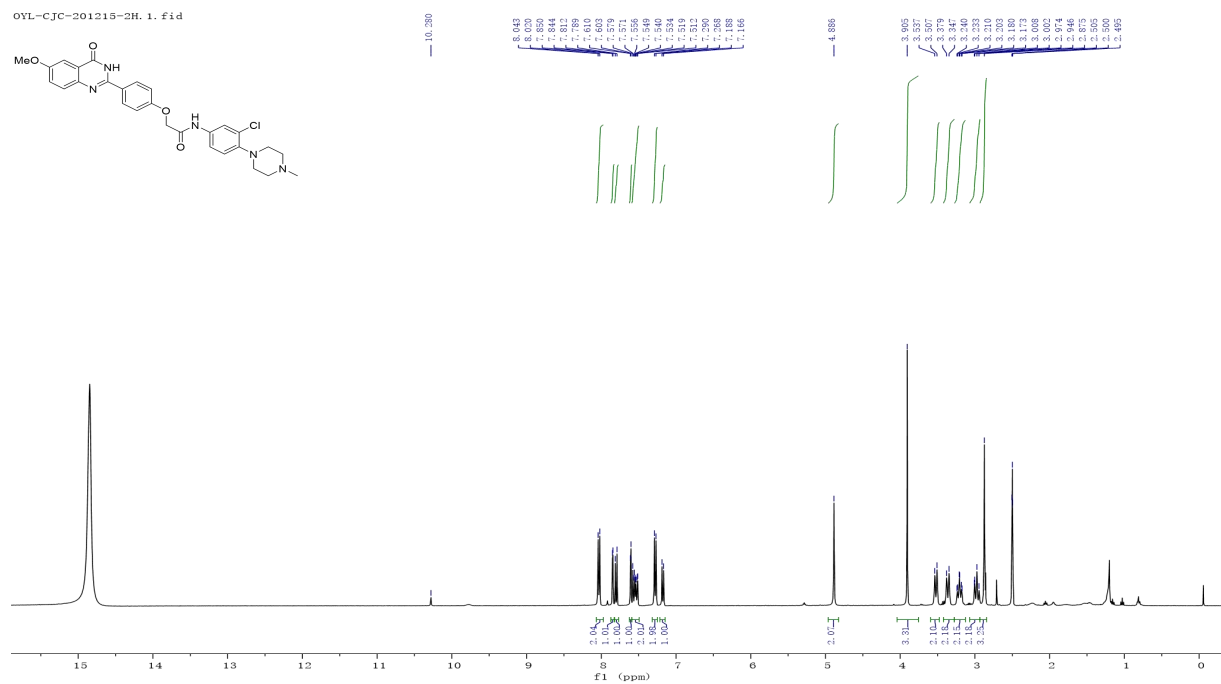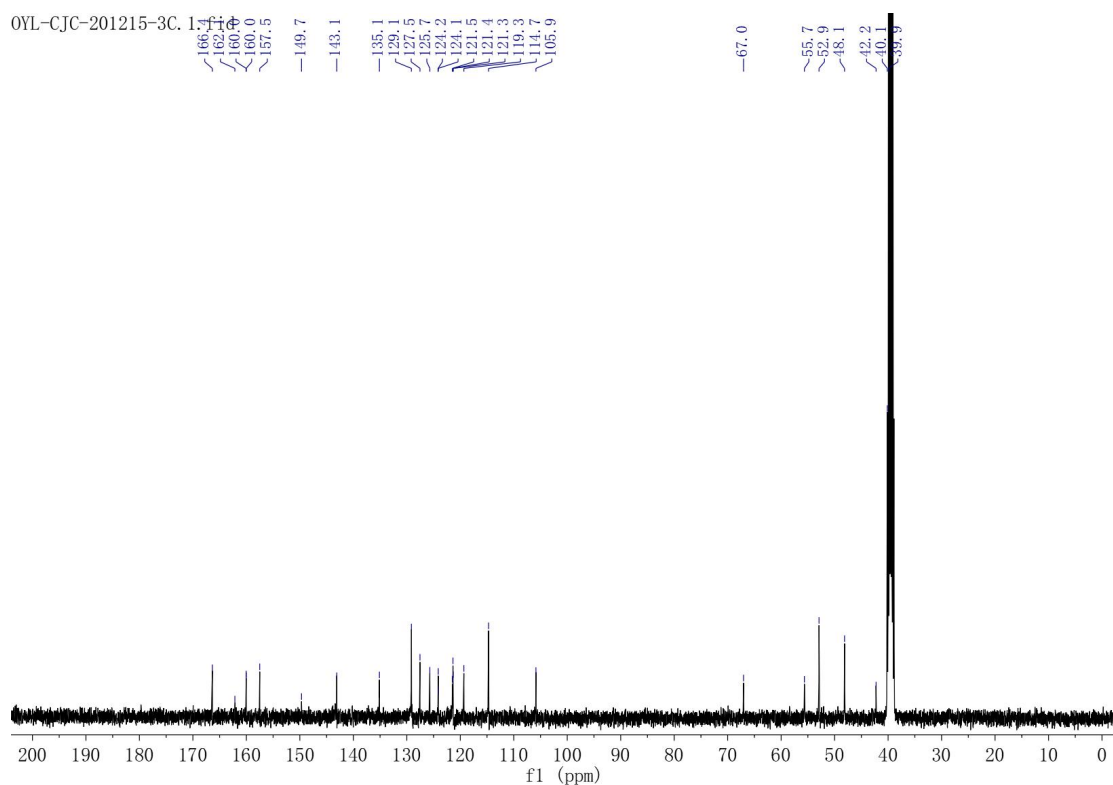



441

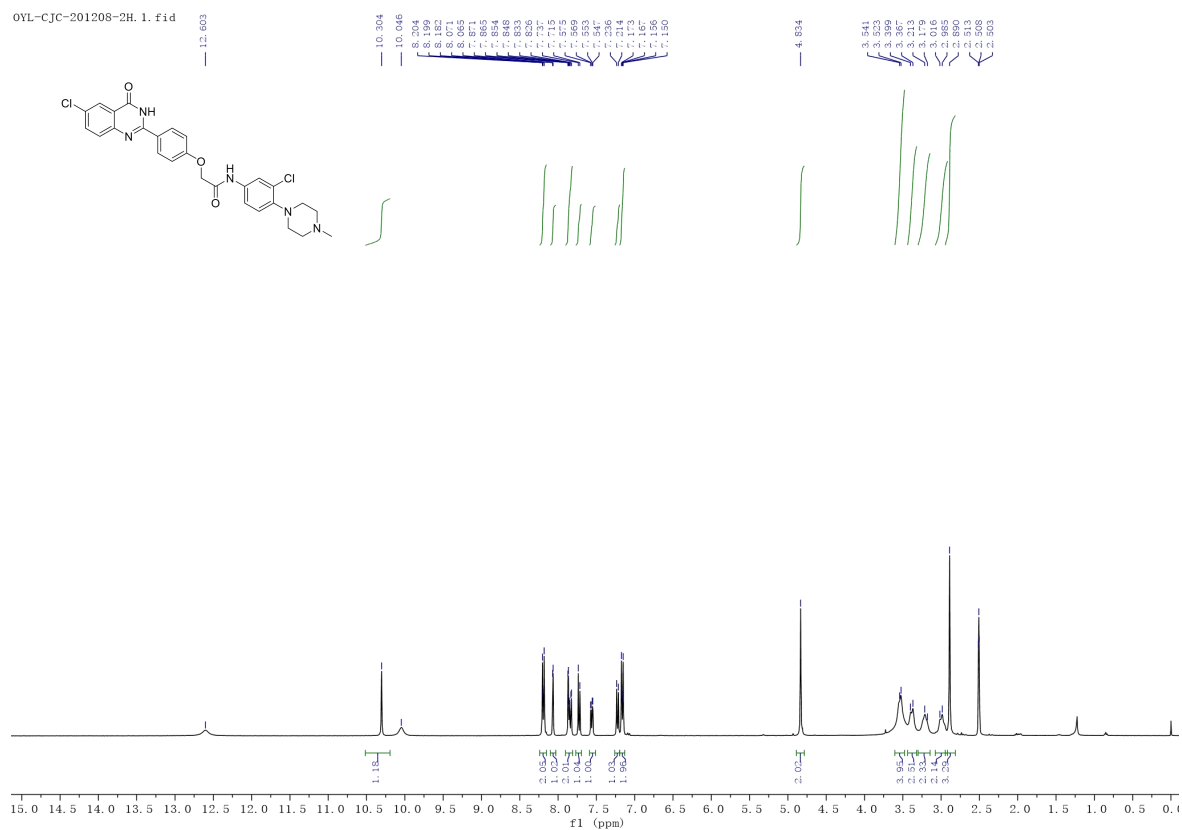

<sup>1</sup>H NMR Spectrum of Compound 441

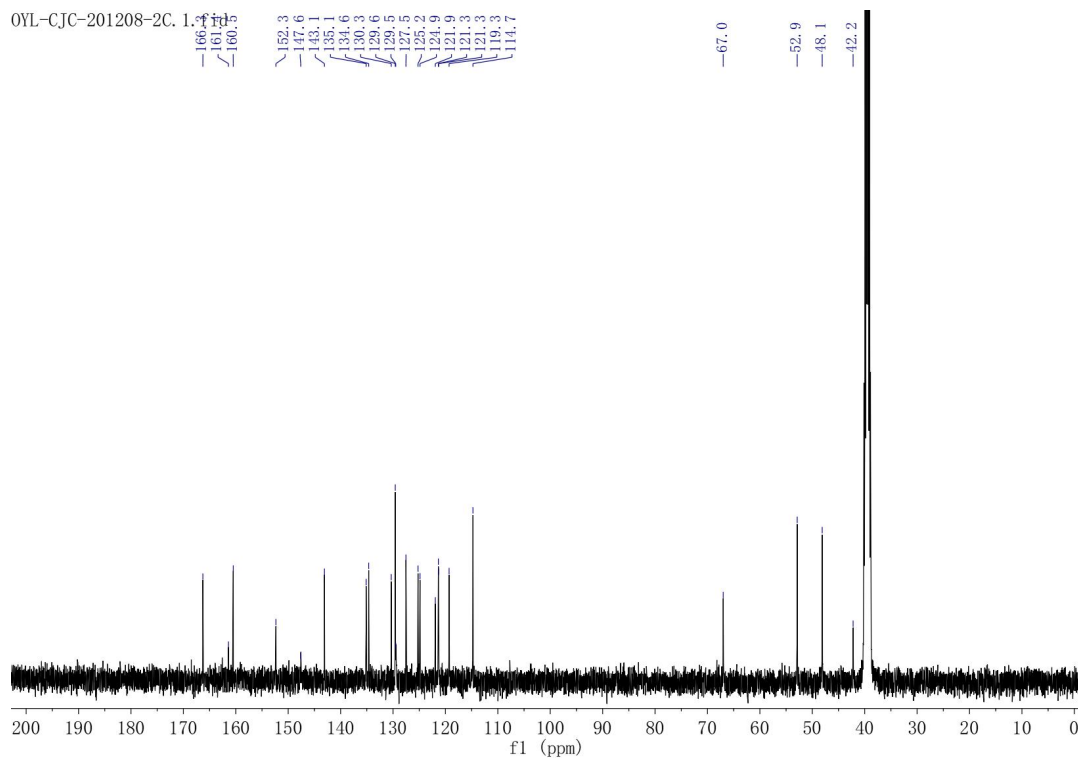

<sup>13</sup>C NMR Spectrum of Compound 441

# 44m

OYL-CJC-201130-d.1.f1d

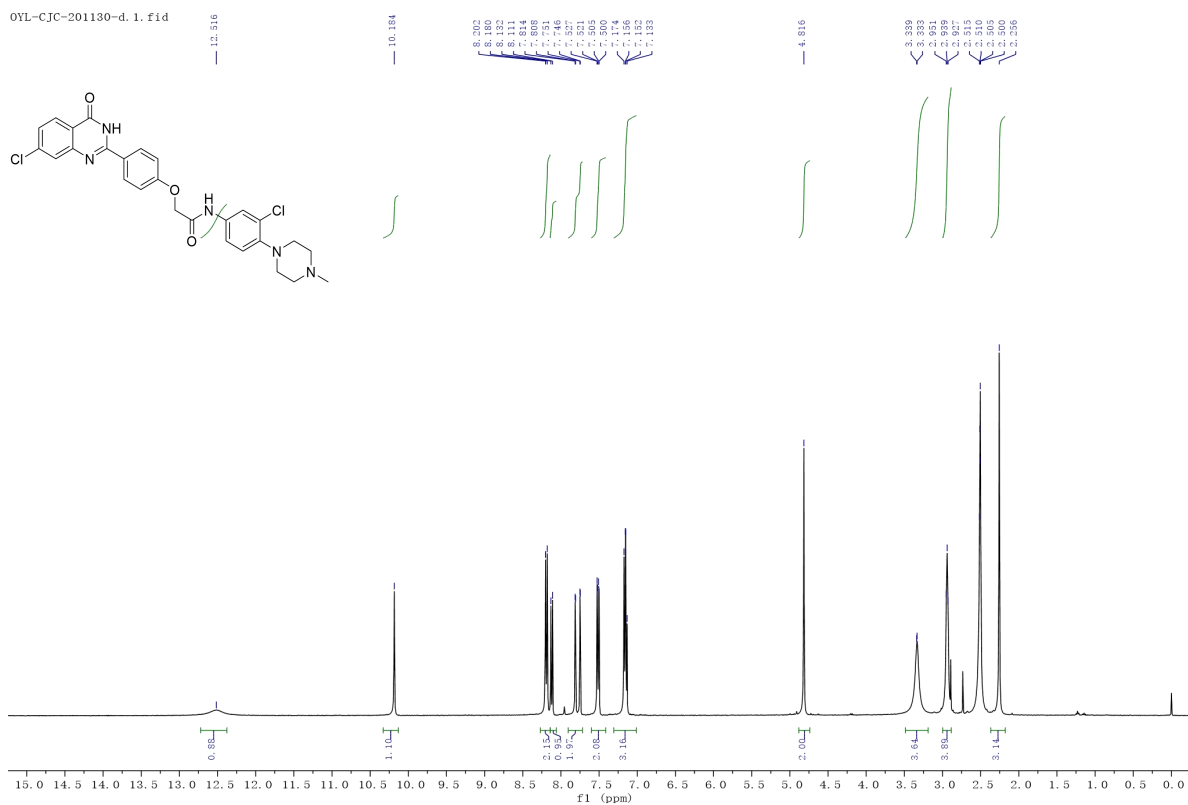

**<sup>1</sup>H NMR Spectrum of Compound 44m**

OYL-CJC-201130-dC.1.

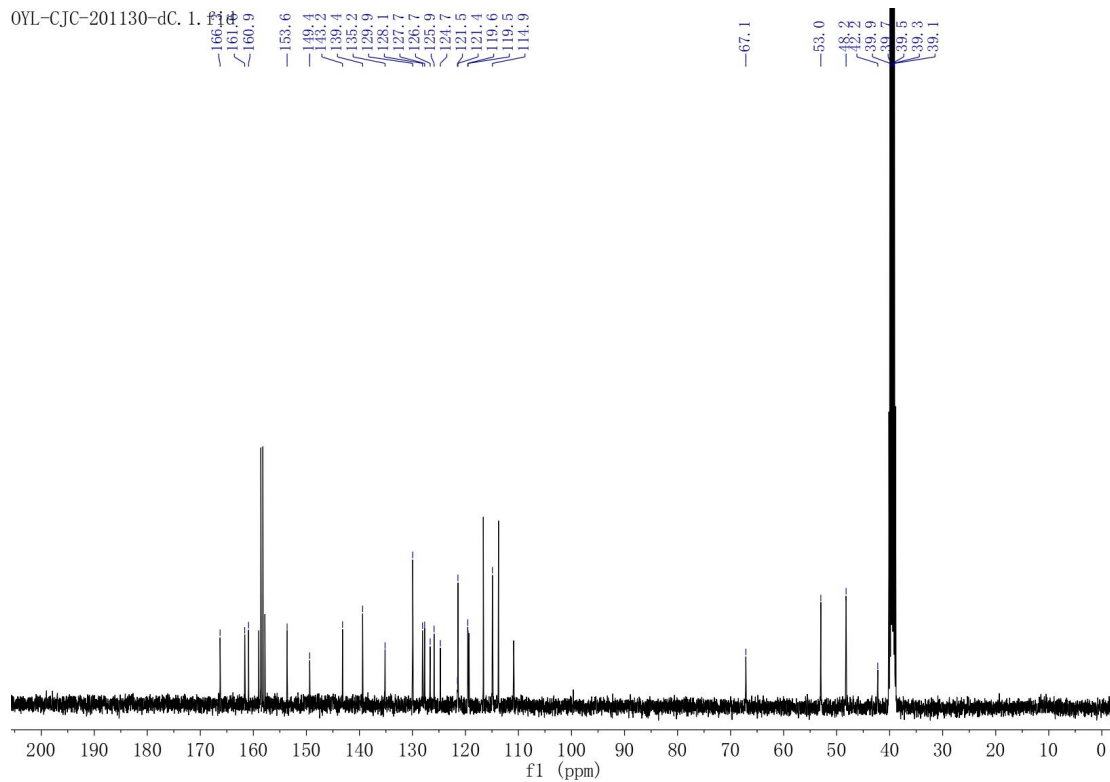

**<sup>13</sup>C NMR Spectrum of Compound 44m**

# 44n

OYL-CJC-201130-c. 1. f1.d

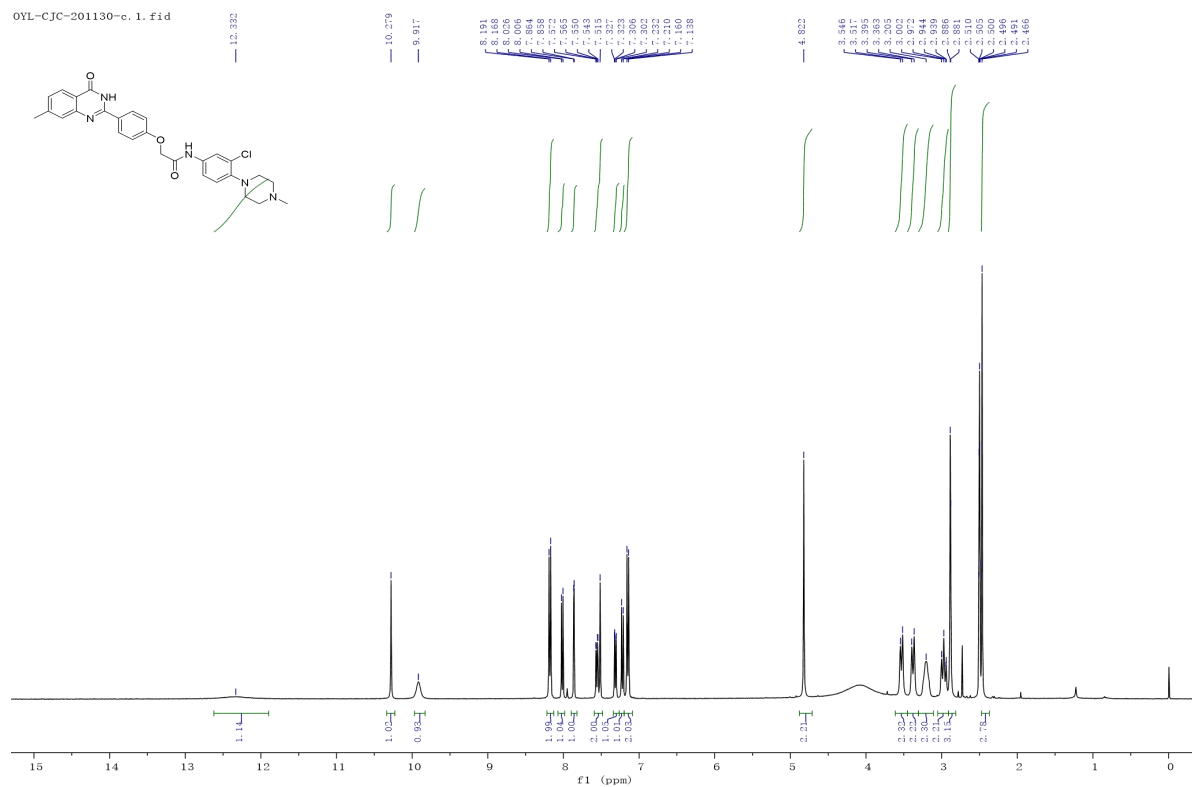

<sup>1</sup>H NMR Spectrum of Compound 44n

OYL-CJC-201130-CC. 1. f1.d

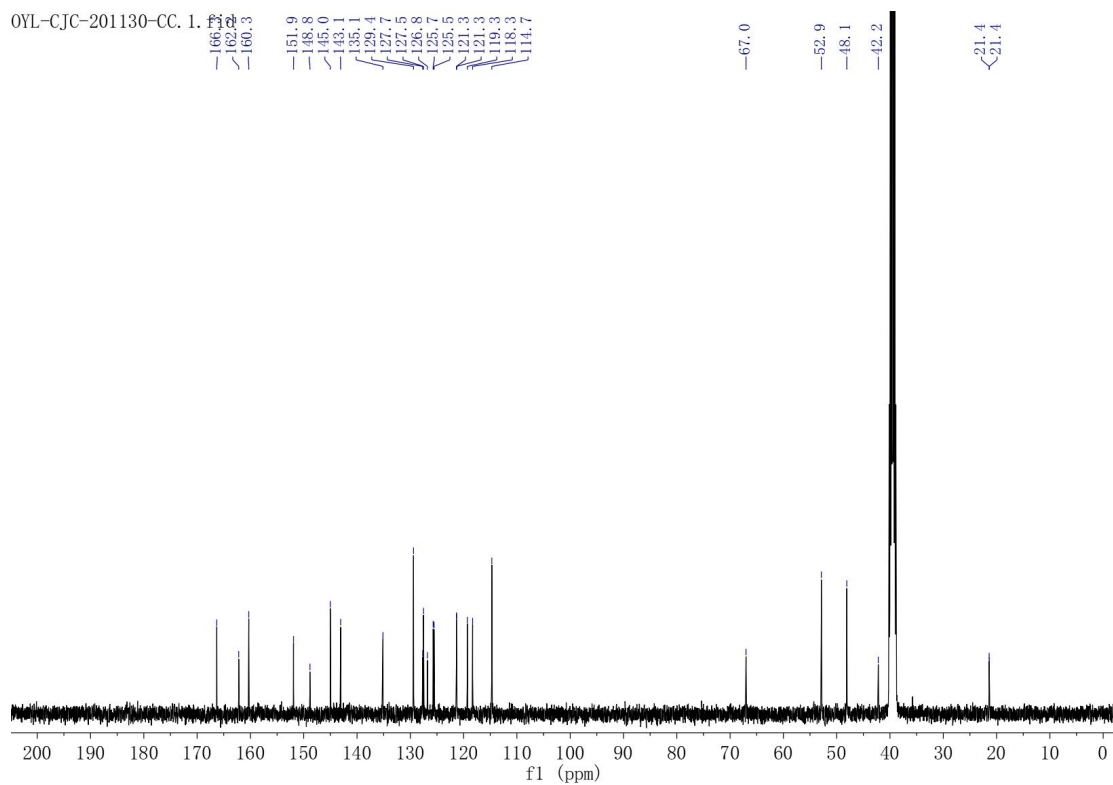

<sup>13</sup>C NMR Spectrum of Compound 44n

### 3. MS data

34a

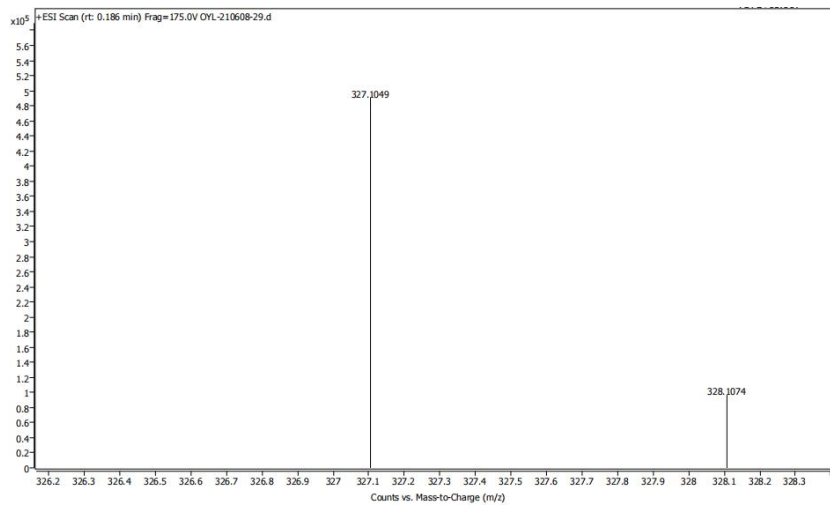

34b

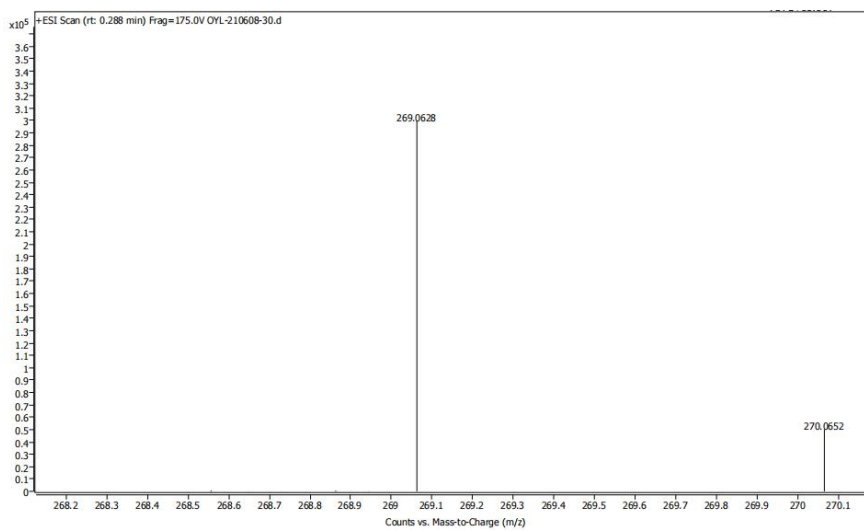

34c

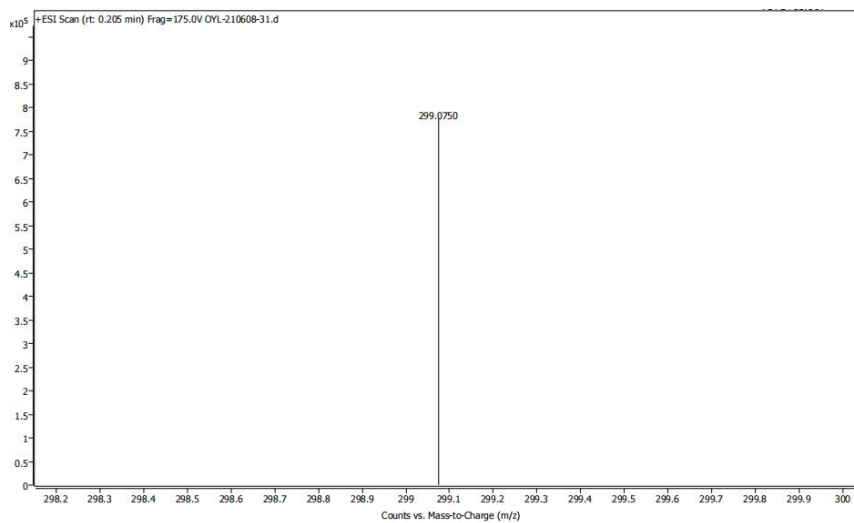

### 38a

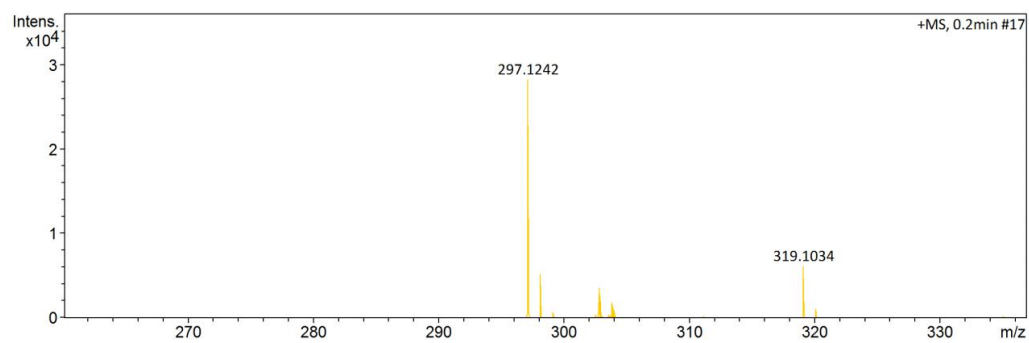

### 38b

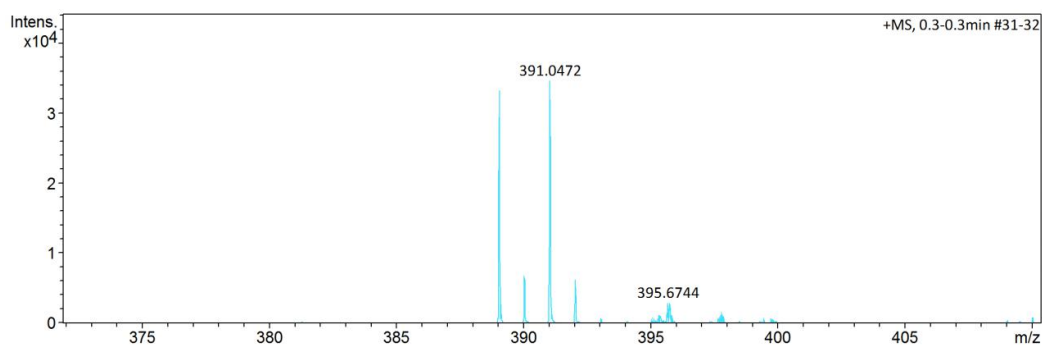

### 38c

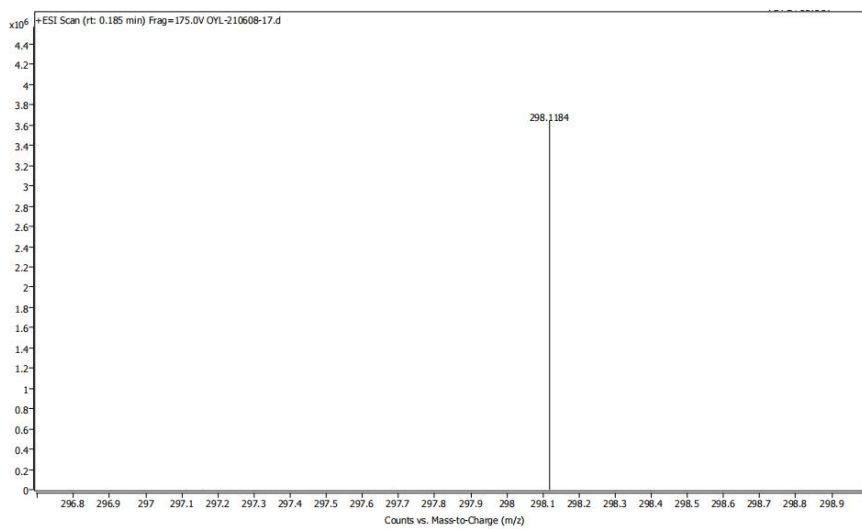

### 38d

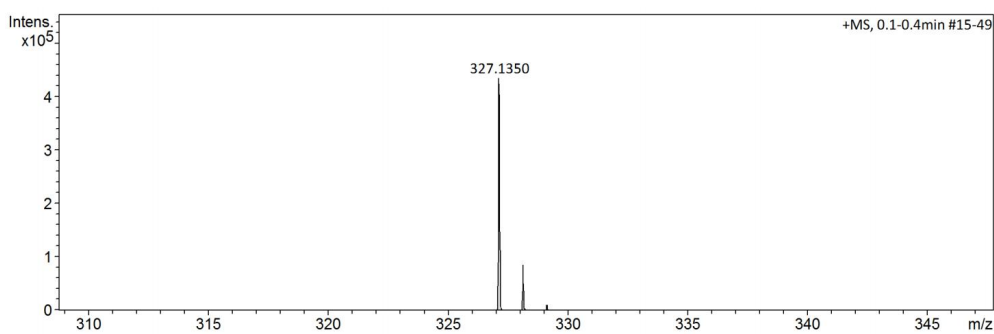

**38e**

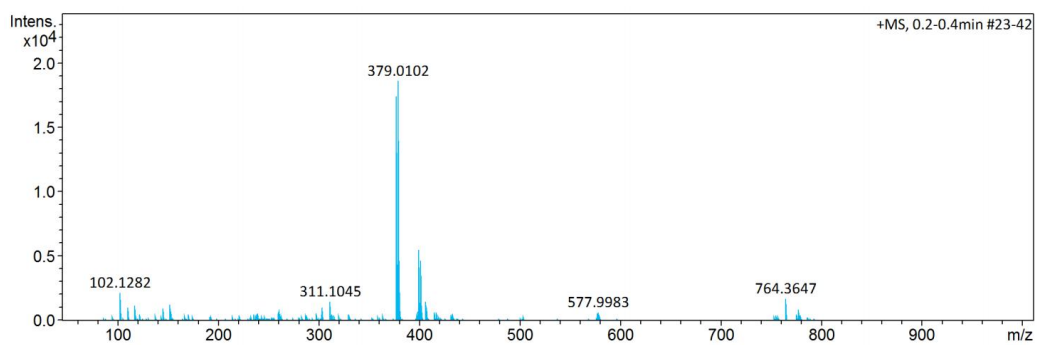

**38f**

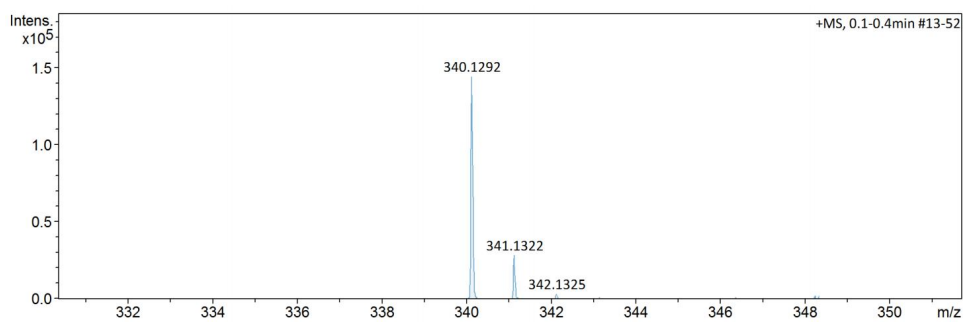

**38g**

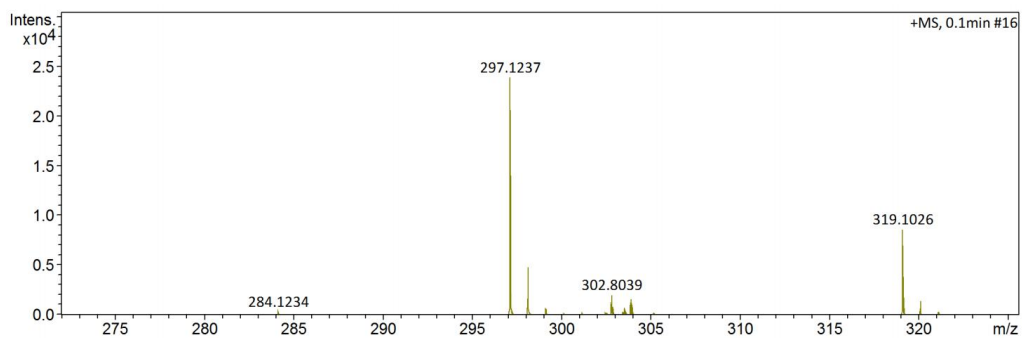

**38h**

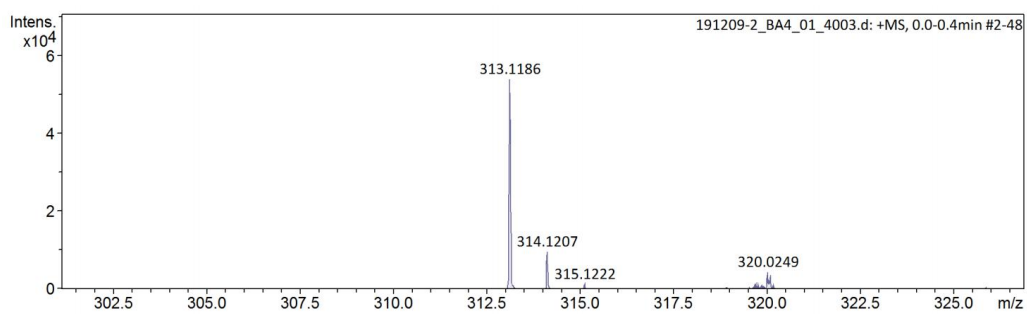

**38i**

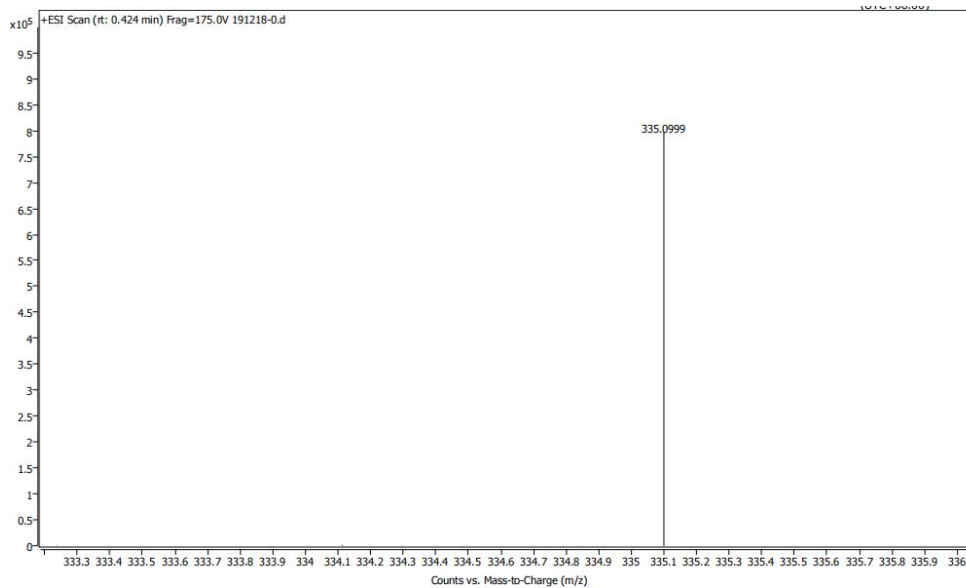

**38j**

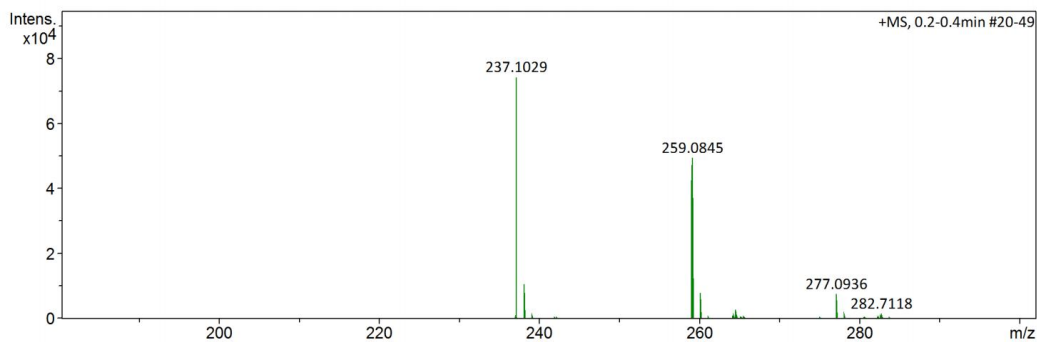

**38k**

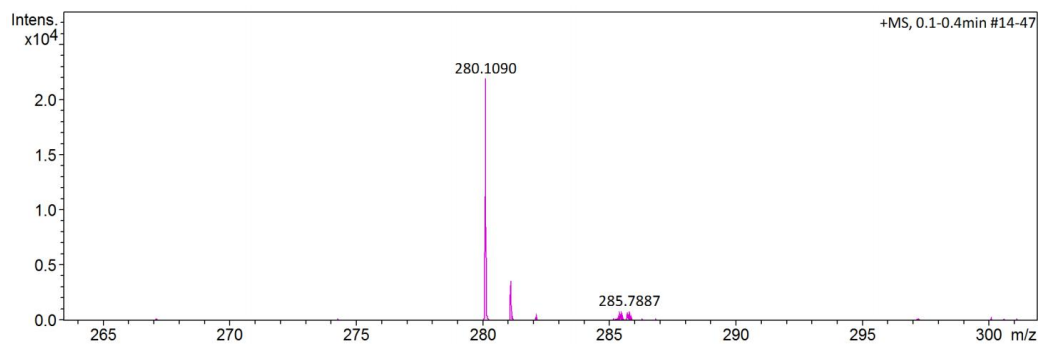

**38l**

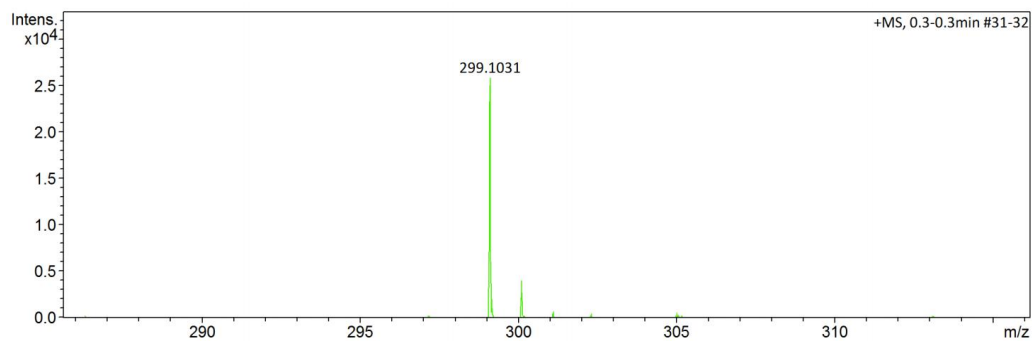

### 38m

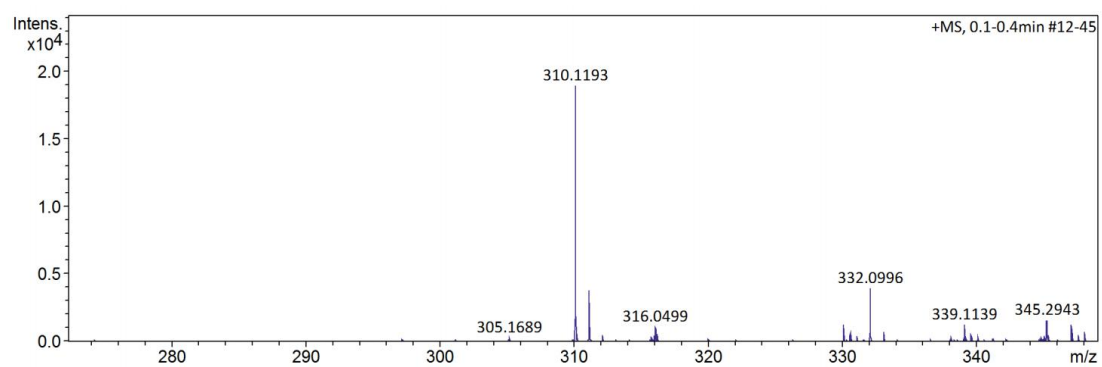

### 38n

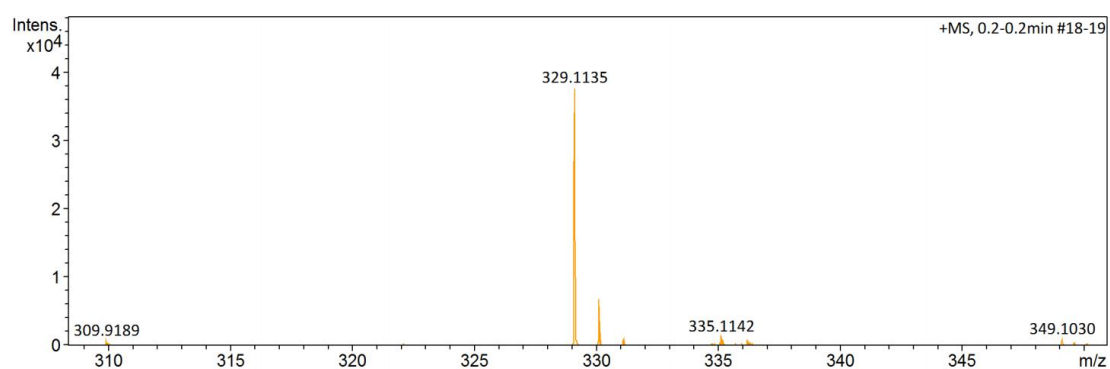

### 38o

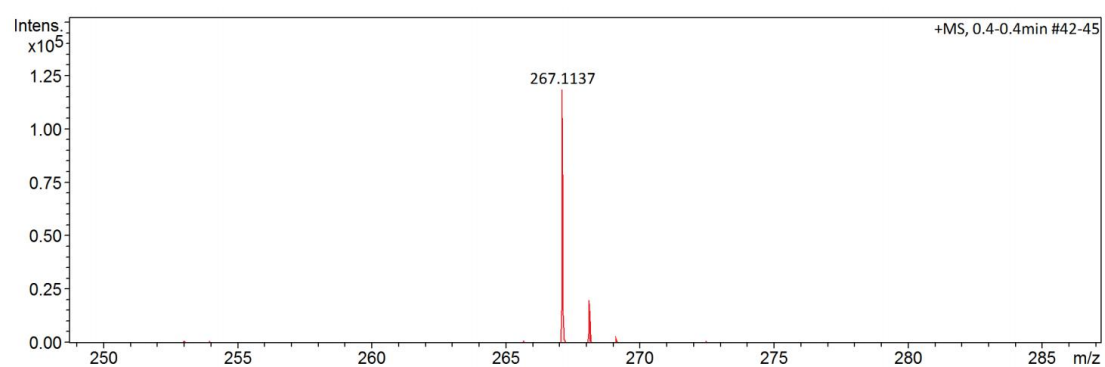

### 38p

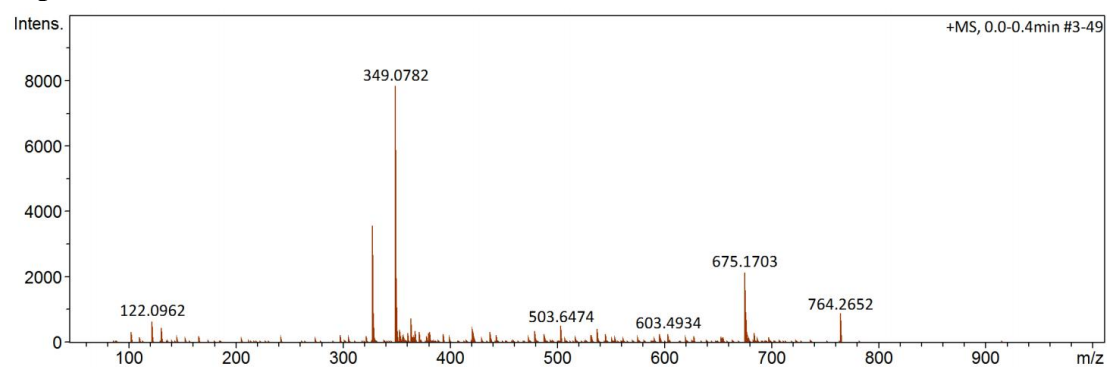



38q

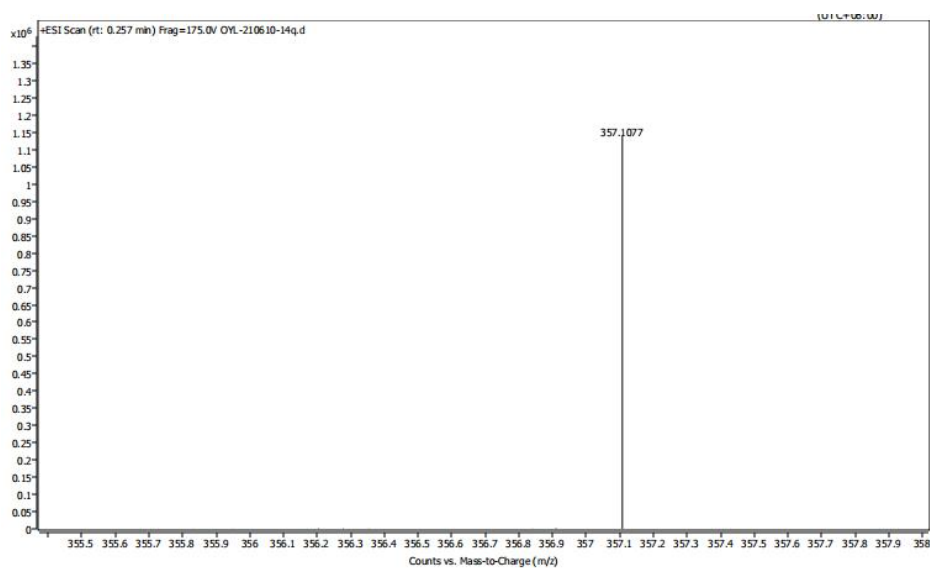

38r

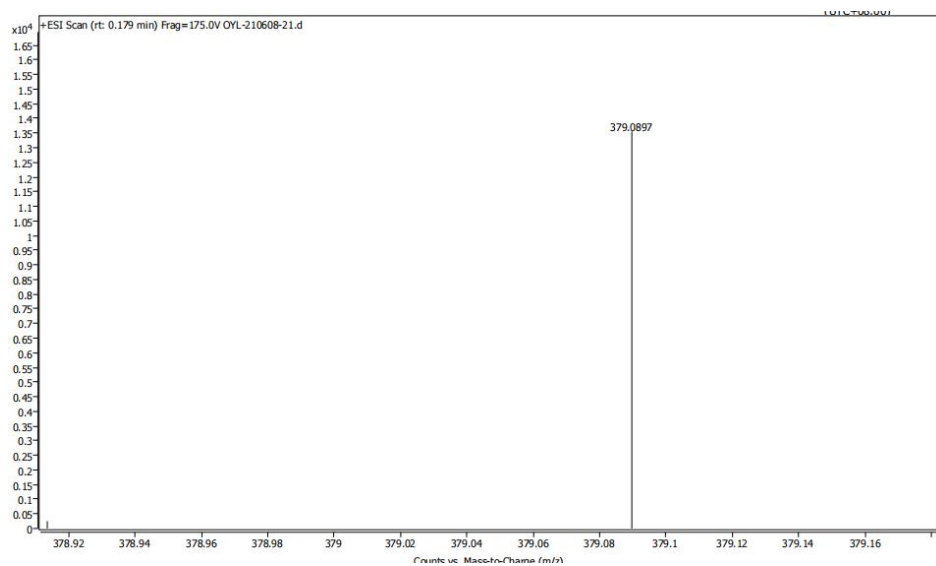

38s

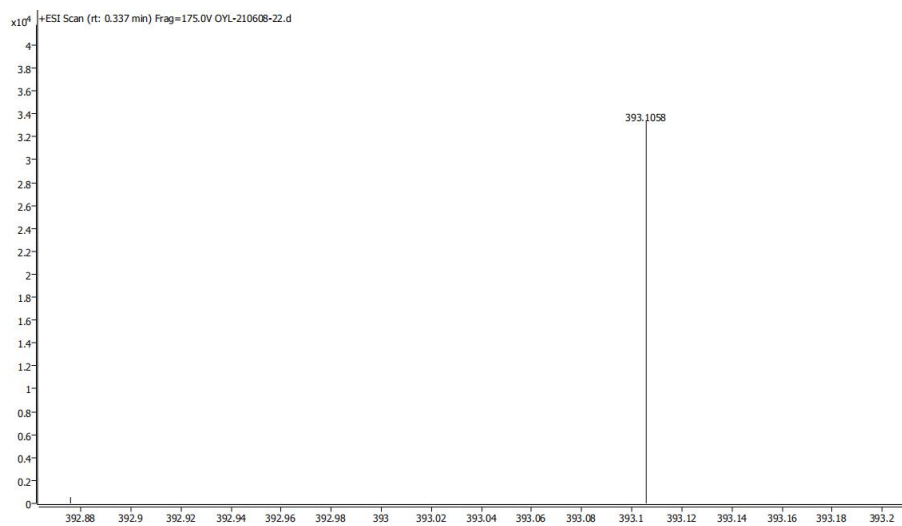

26

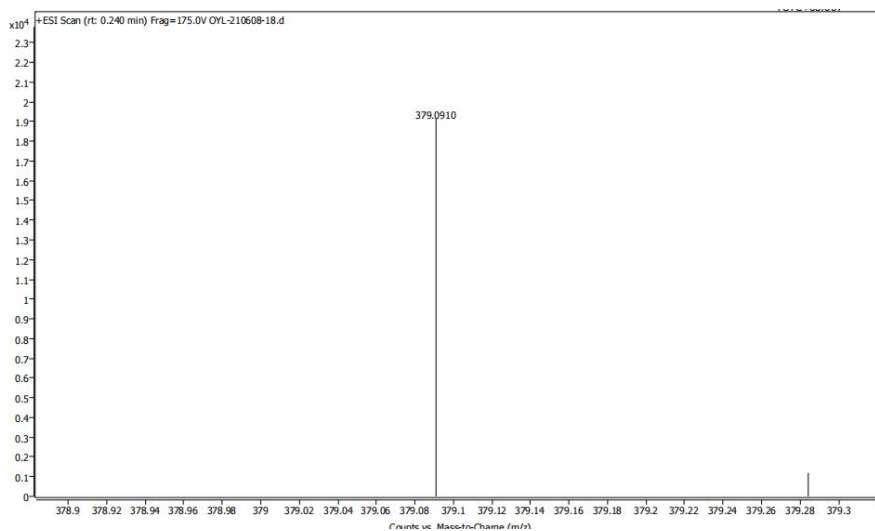

42a

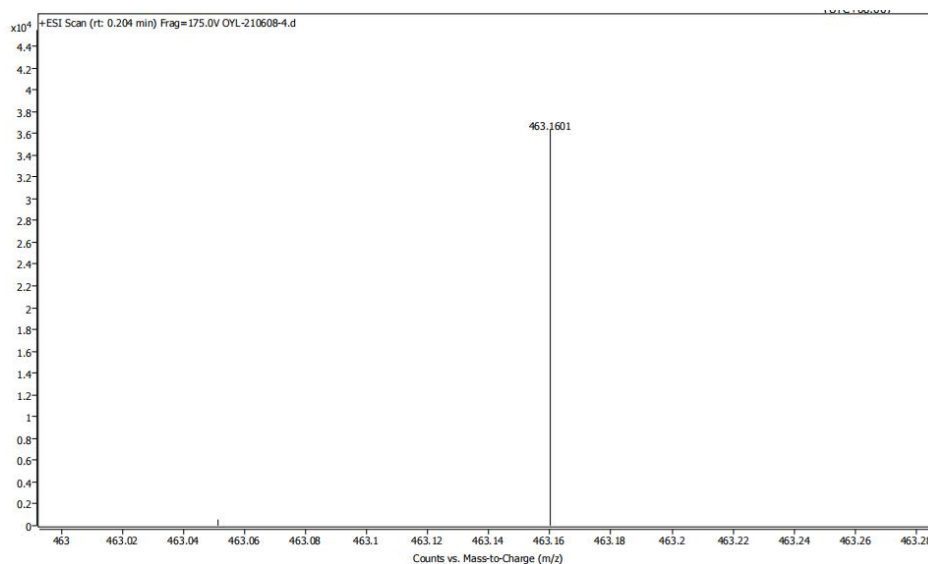

42b

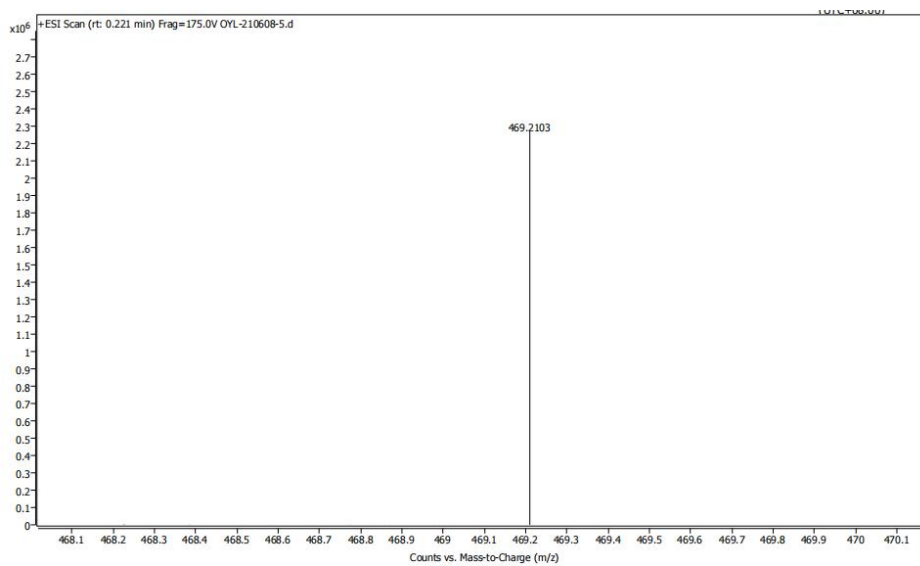

42c

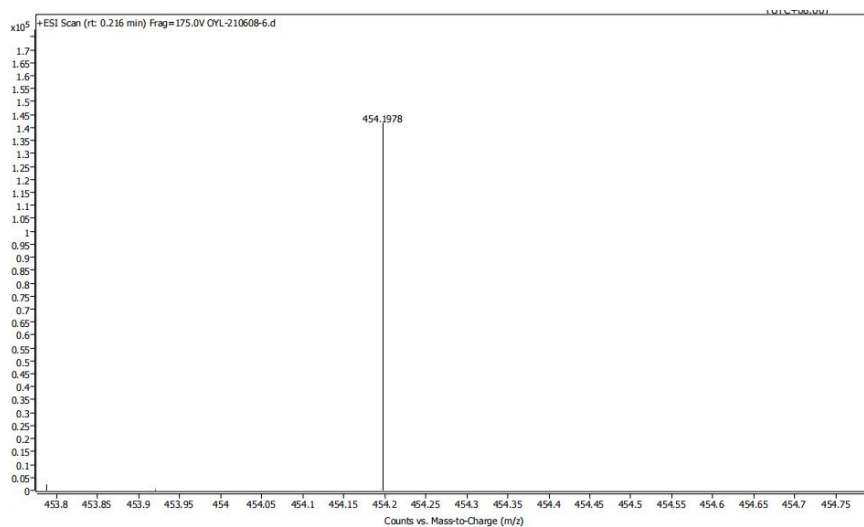

42d

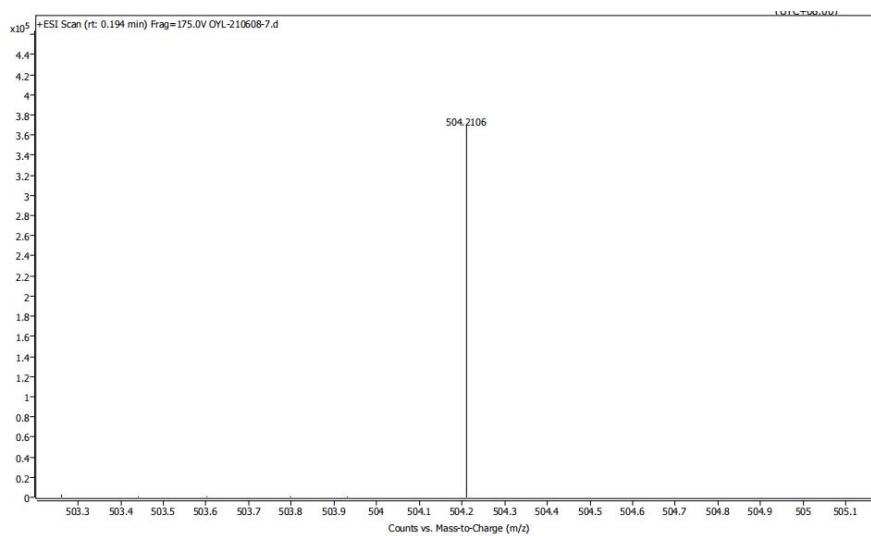

42e

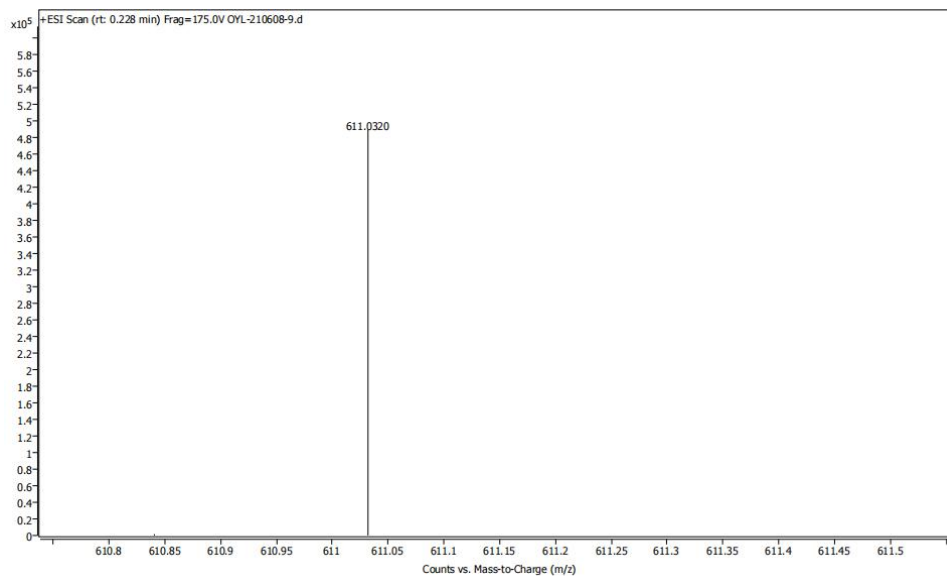

42f

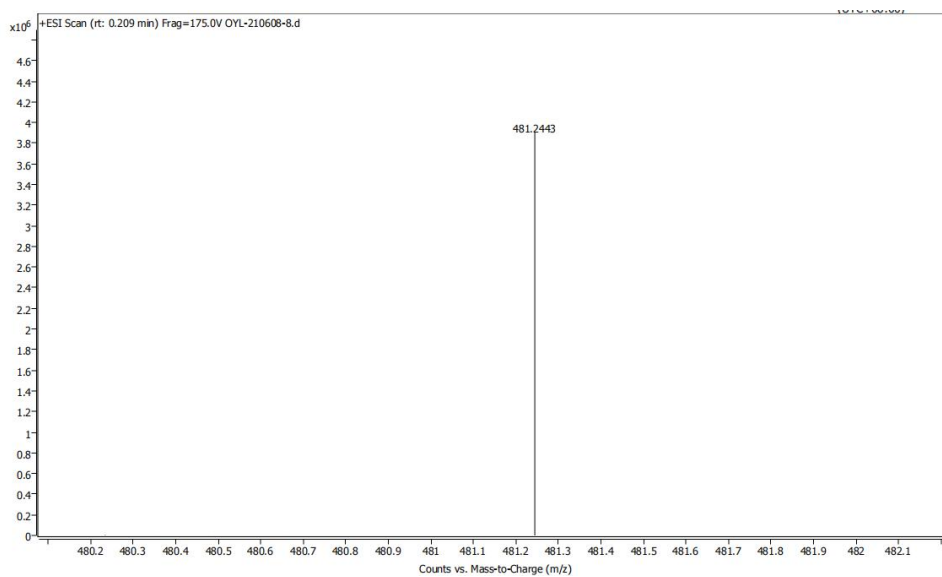

42g

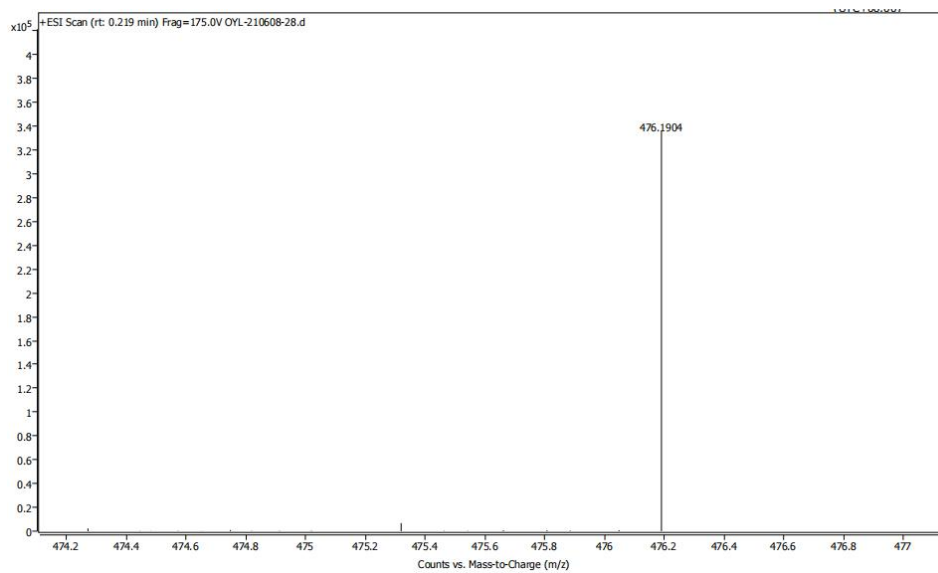

42h

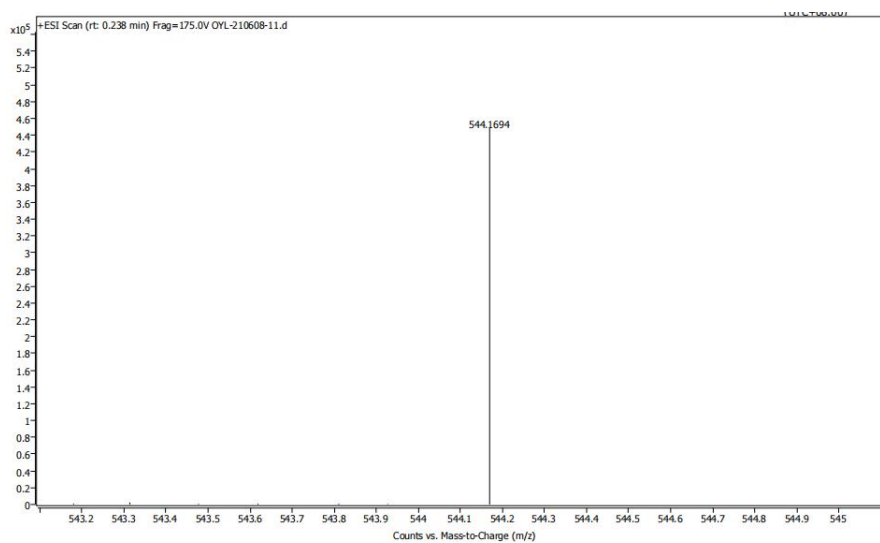

42i

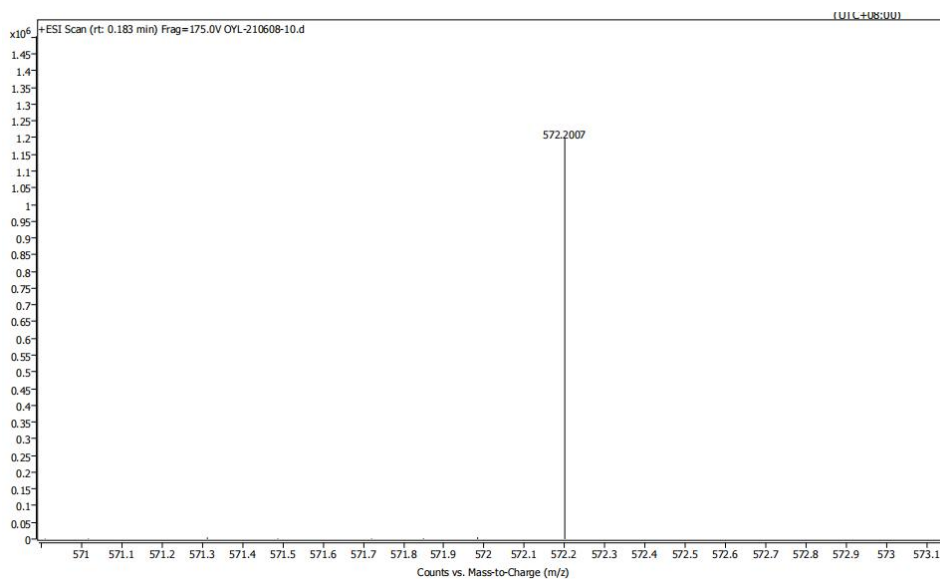

42j

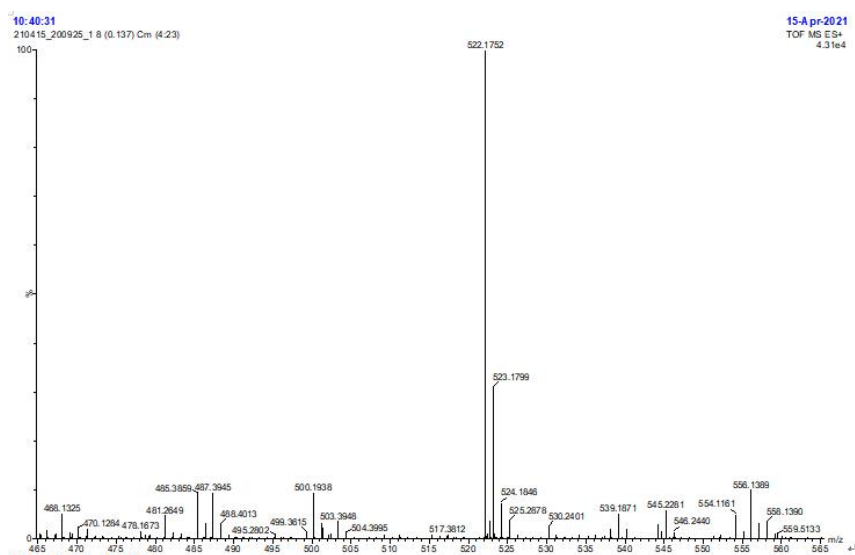

43a

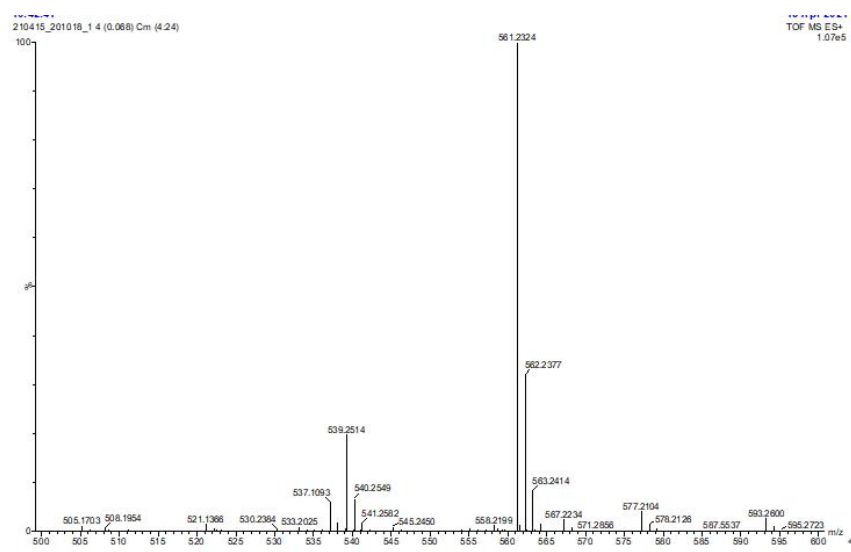

43b

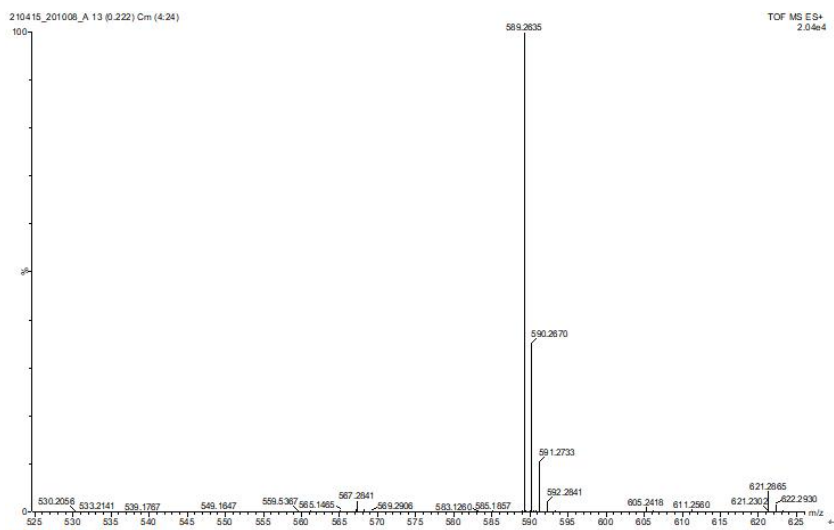

43c

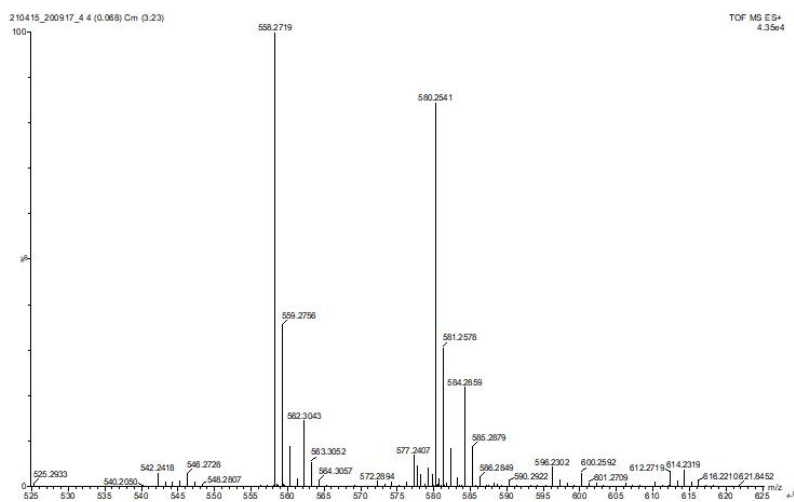

43d

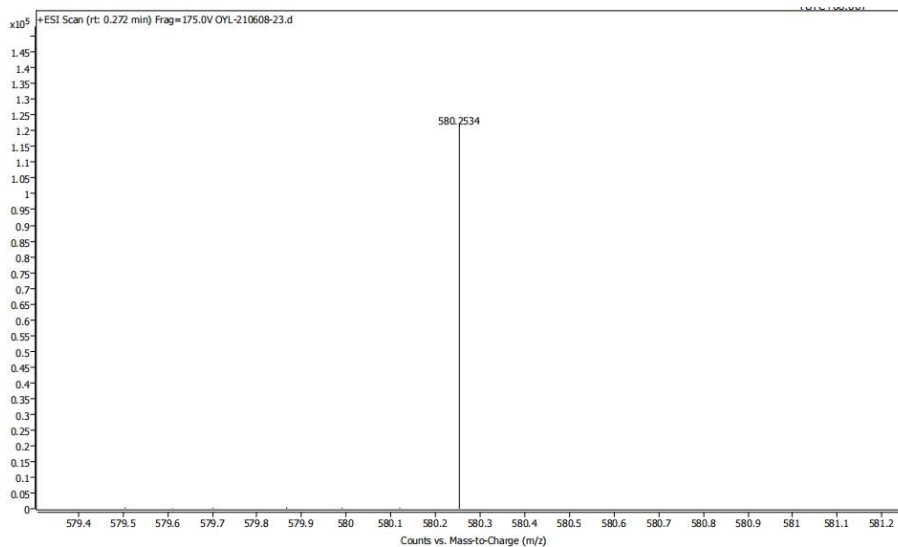

43e

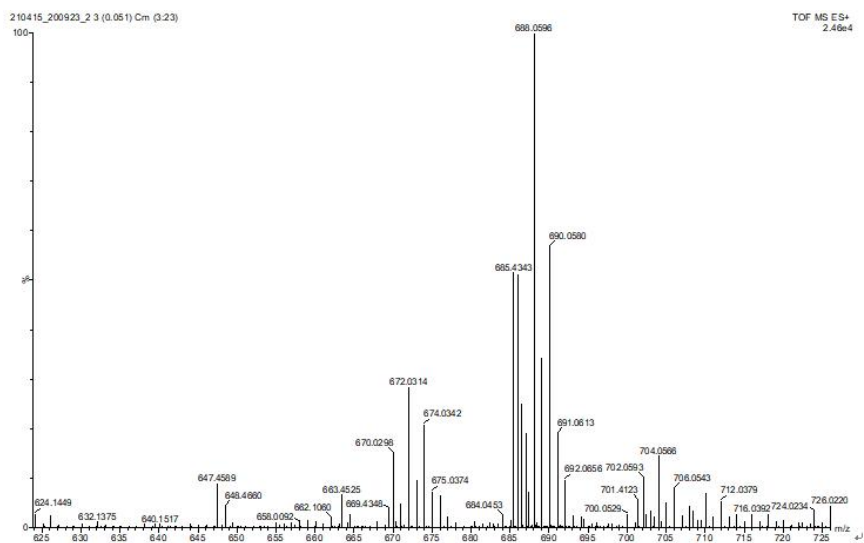

43f

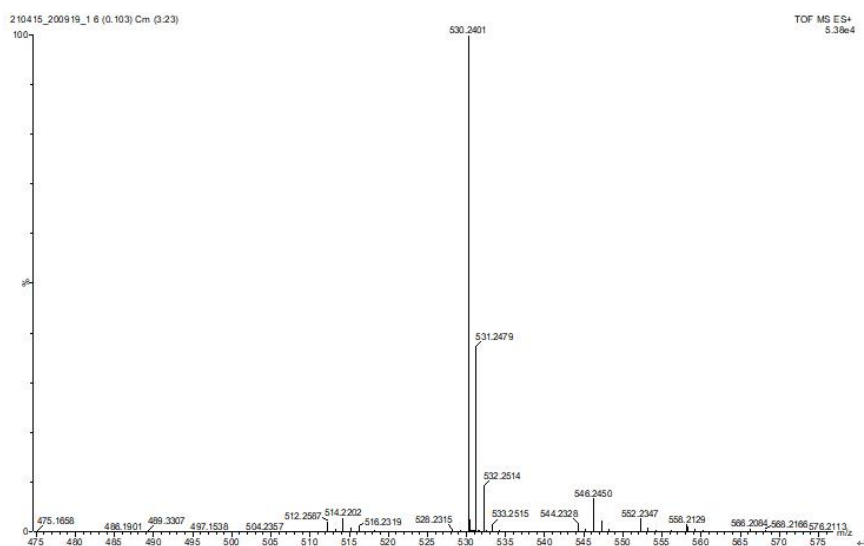

43g

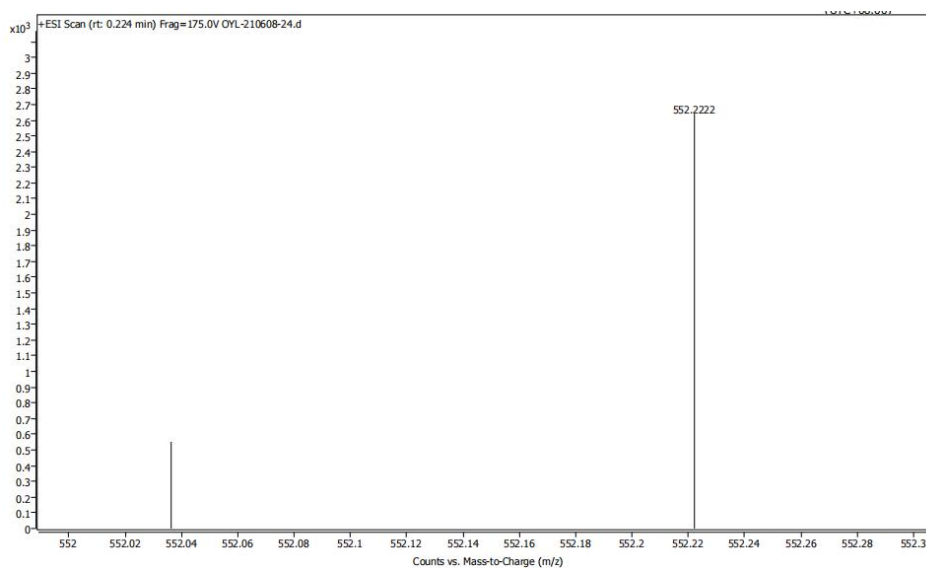

43h

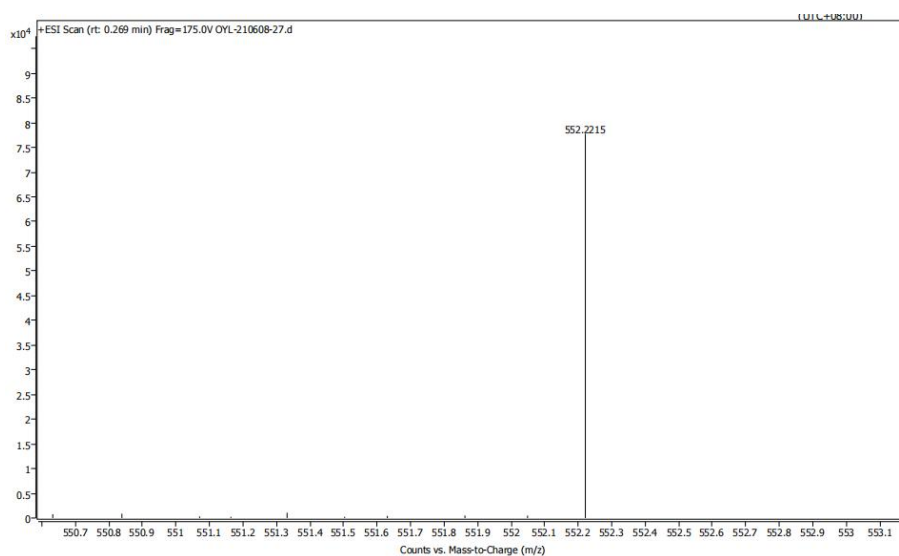

43i

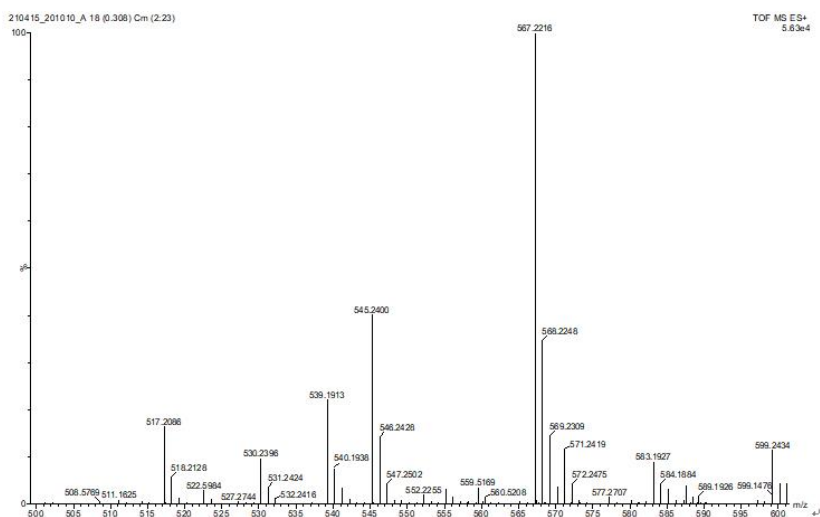

43j

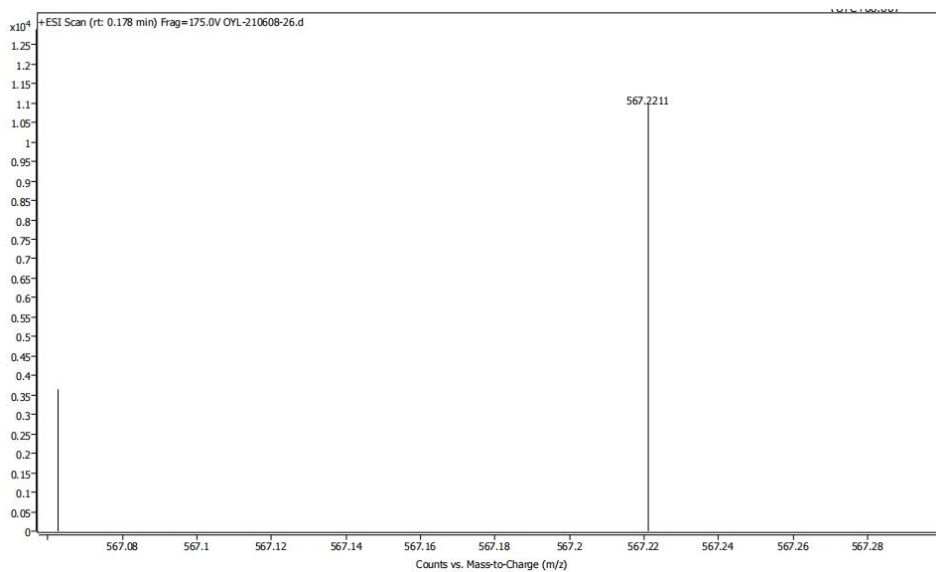



# 43k

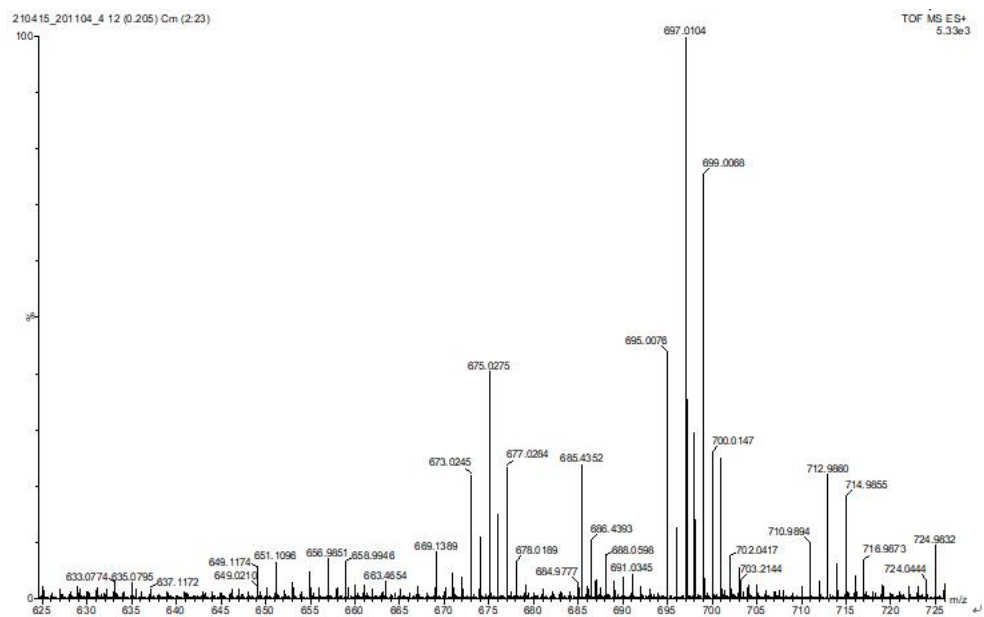

# 43l

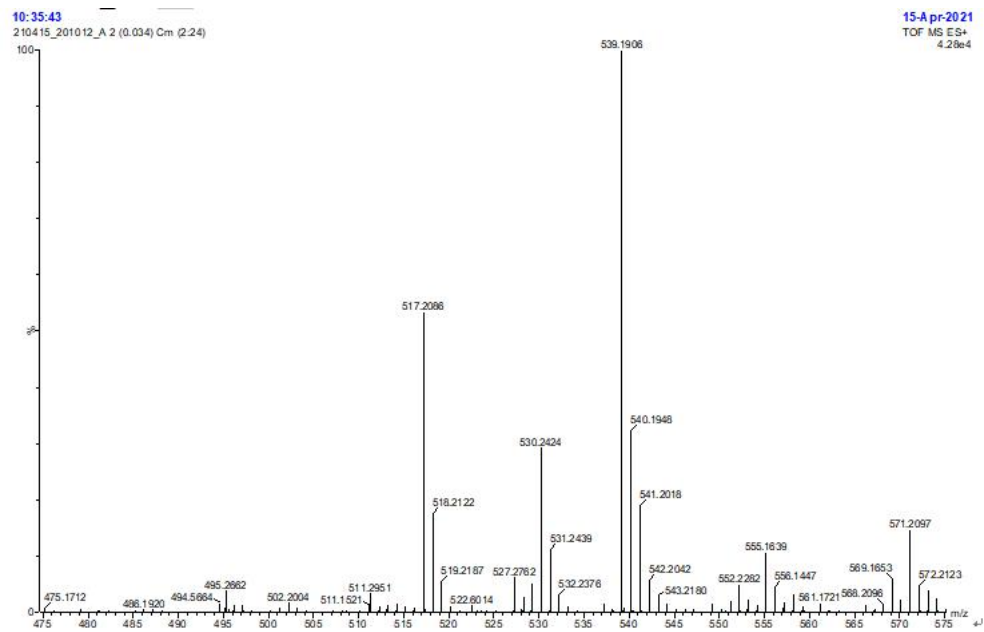

### 43m

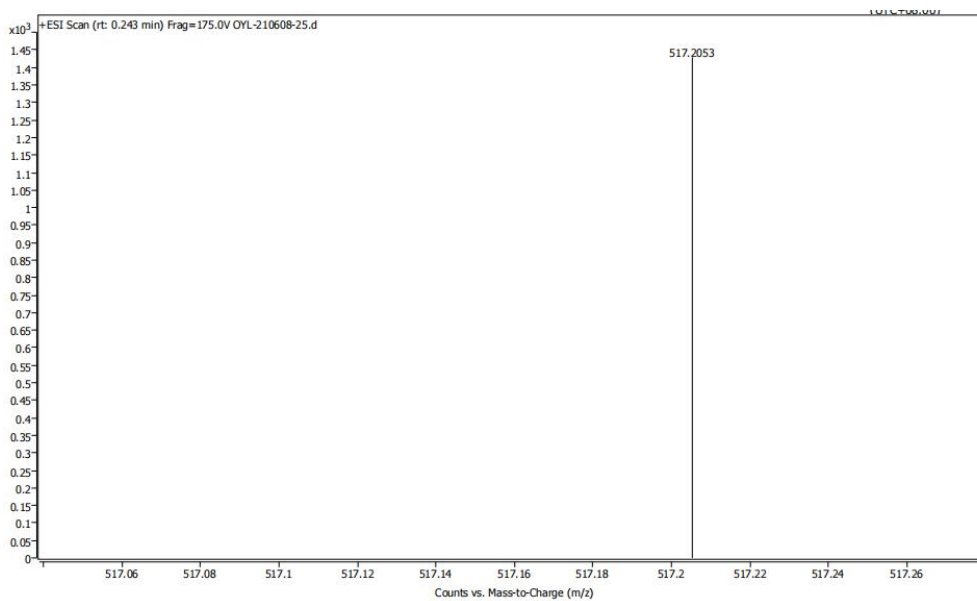

### 43n

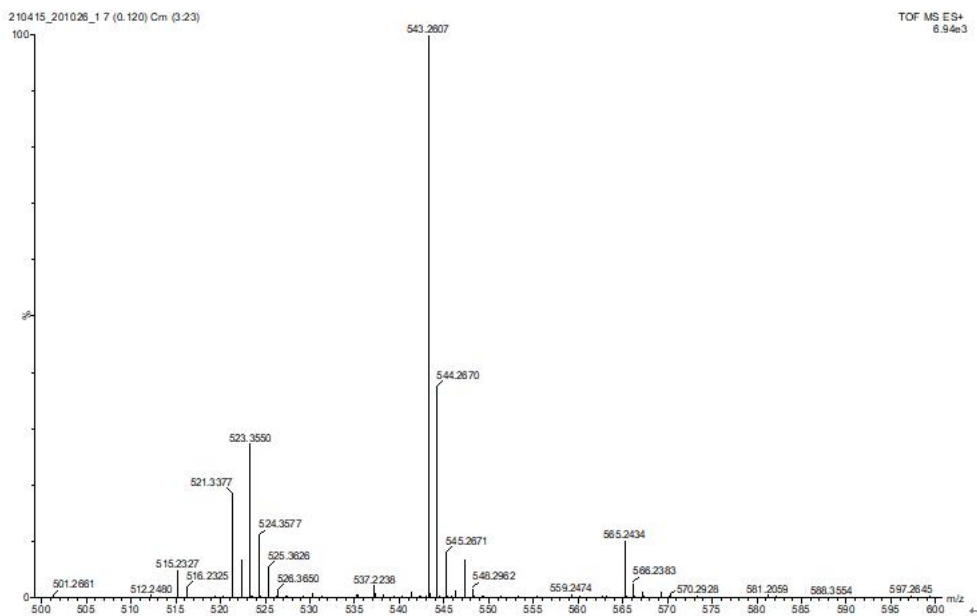

### 43o

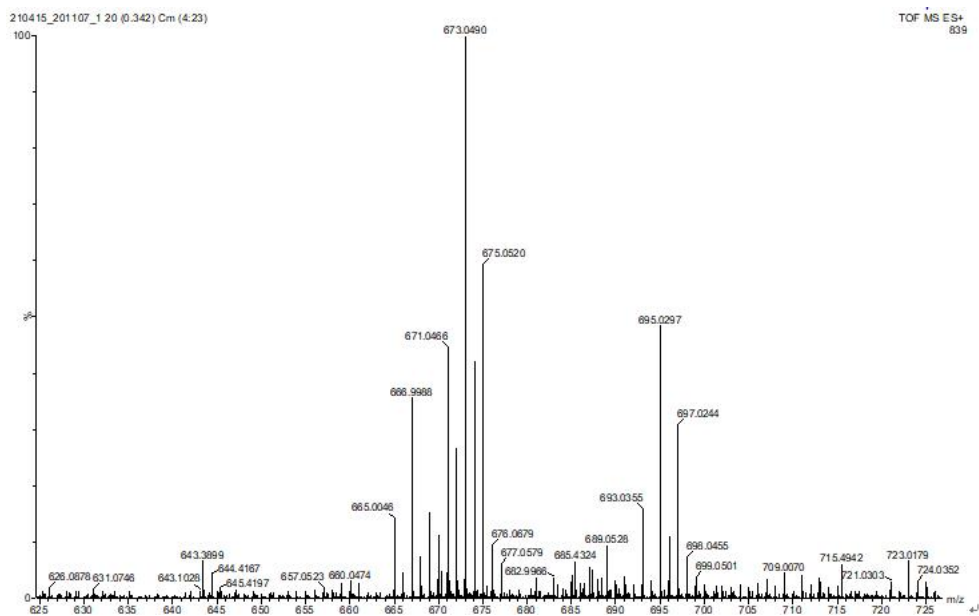

### 43p

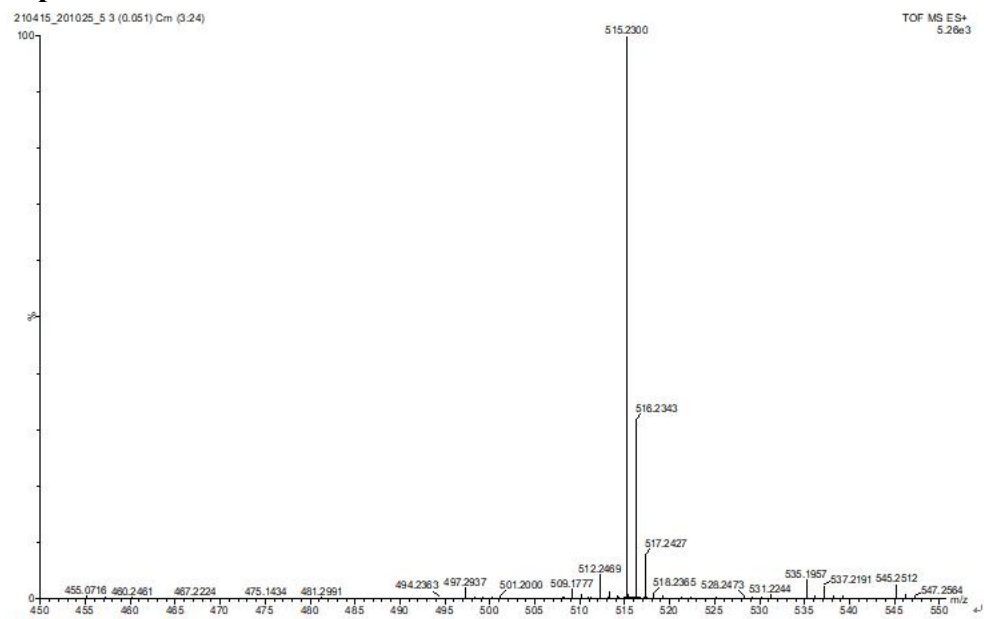

### 43q

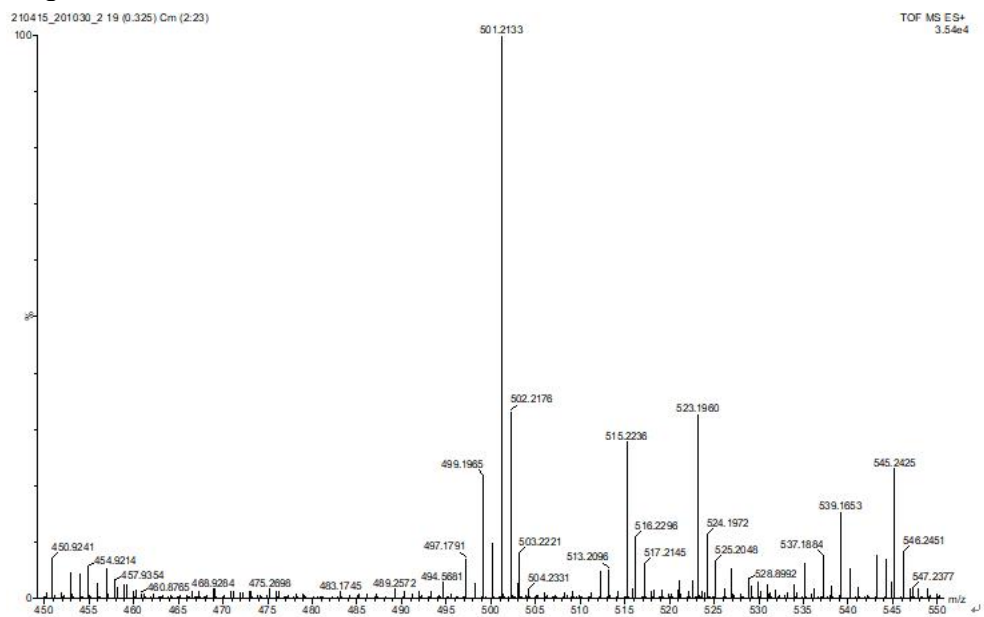

### 44a

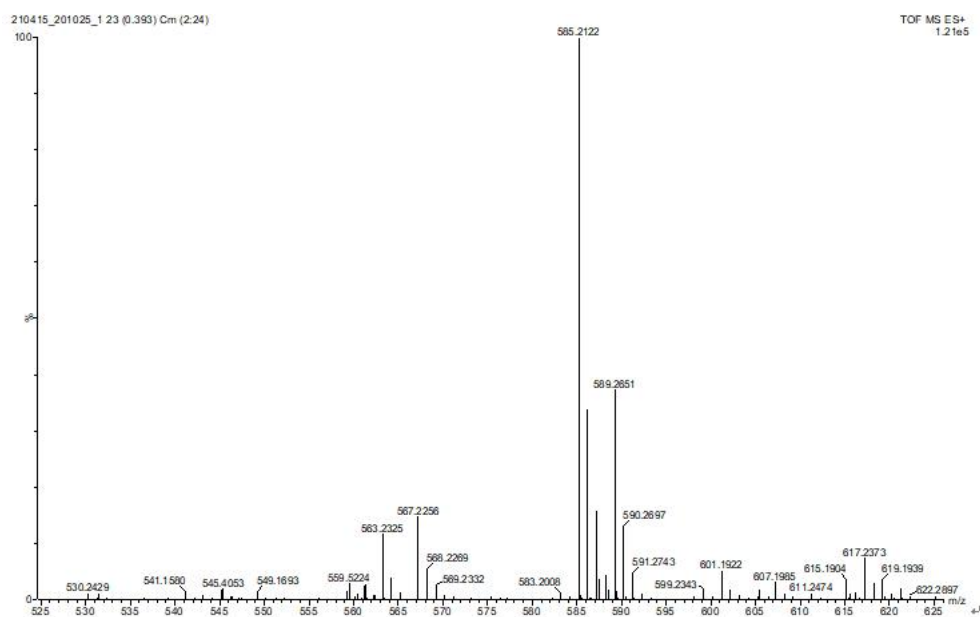

### 44b

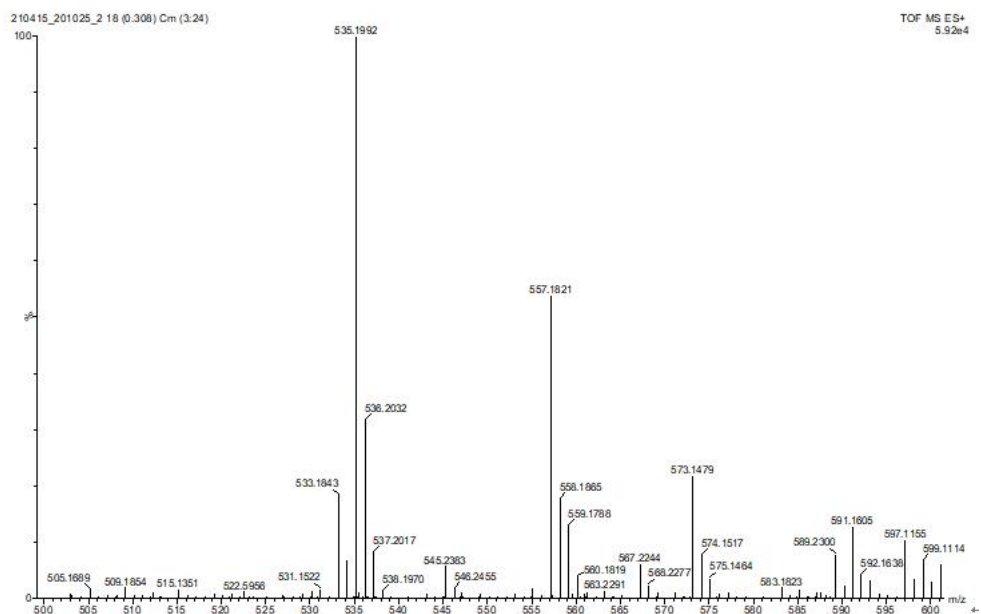

### 44c

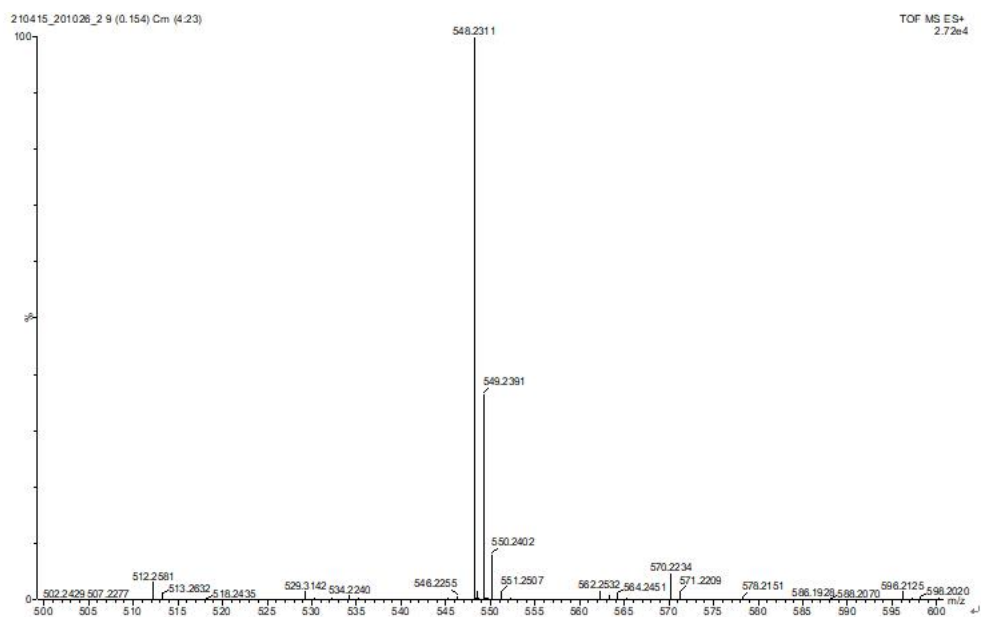

### 44d

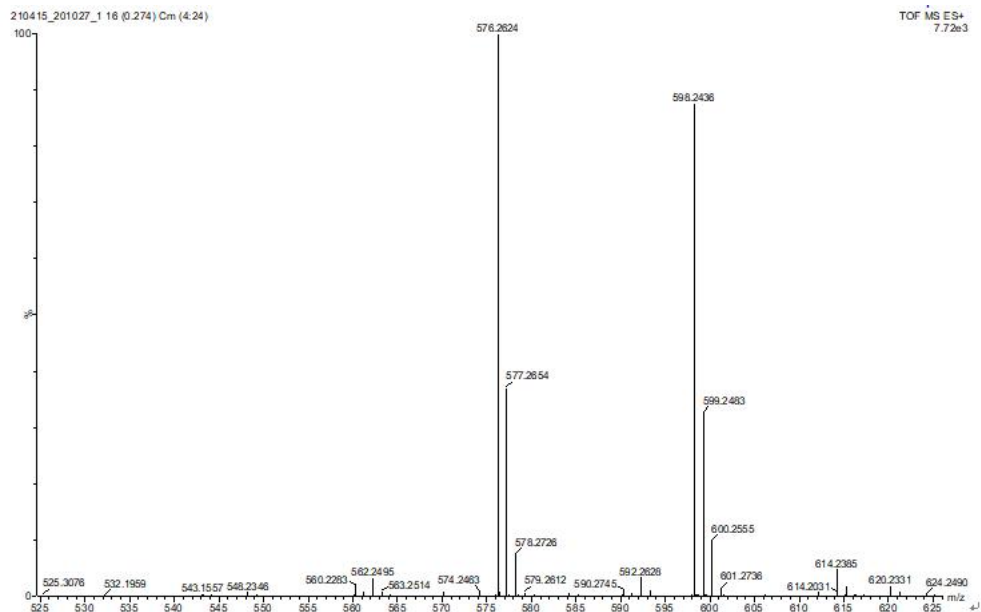

### 44e

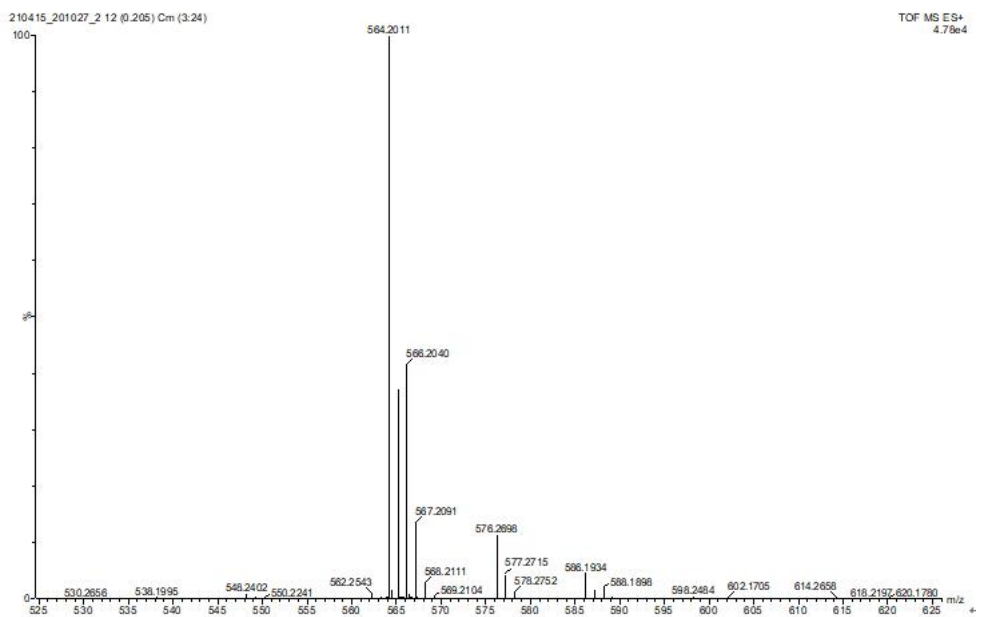

44f

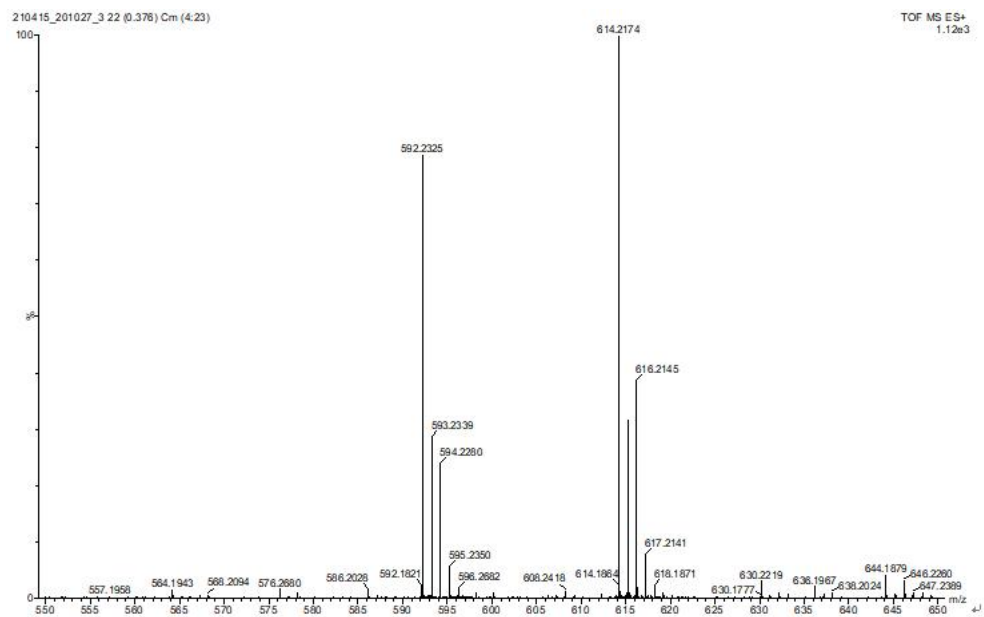

44g

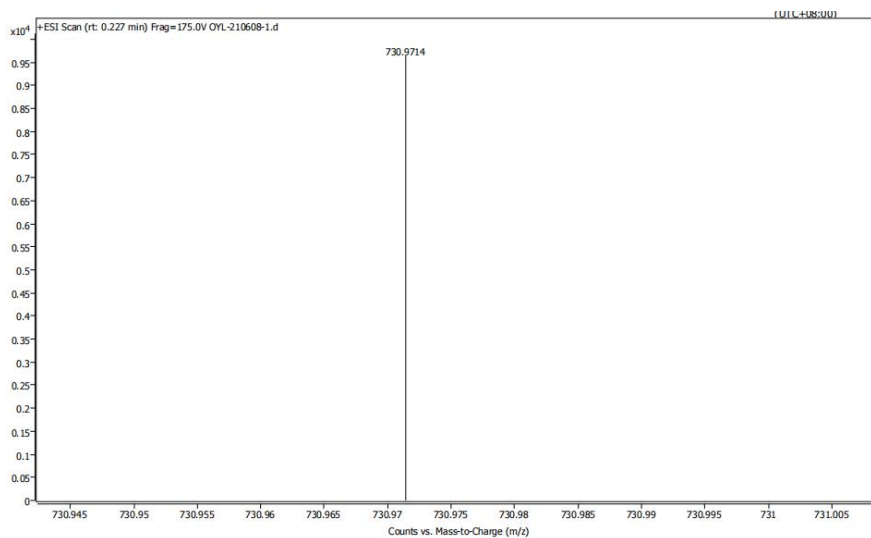

44h

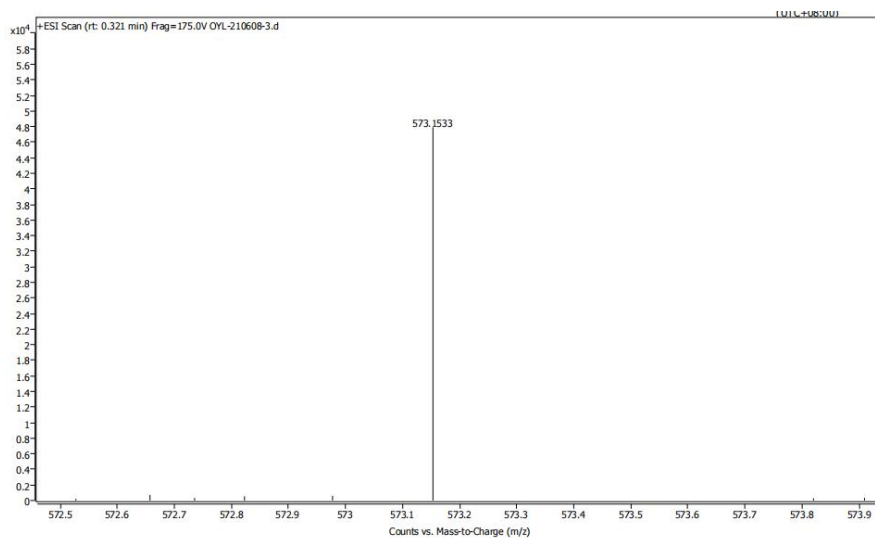

44i

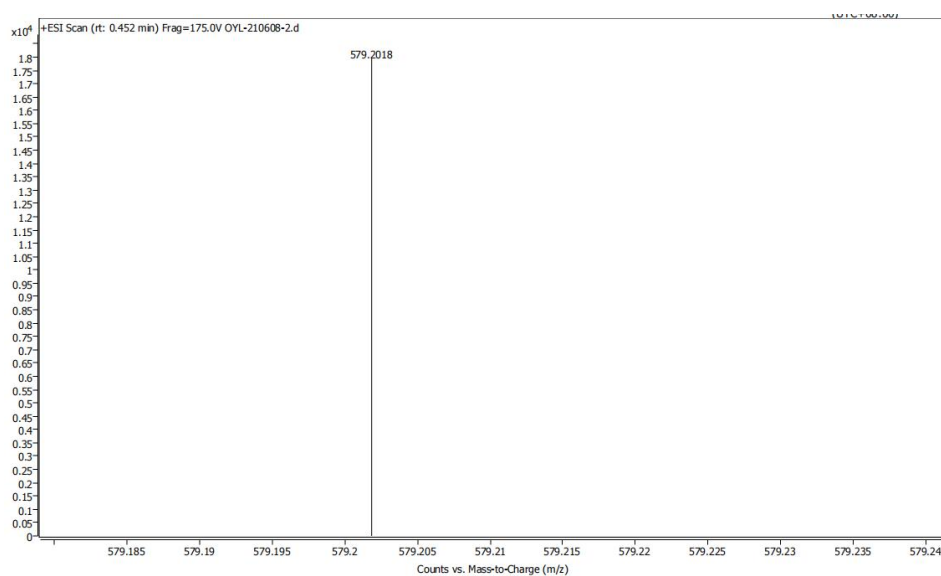

44j

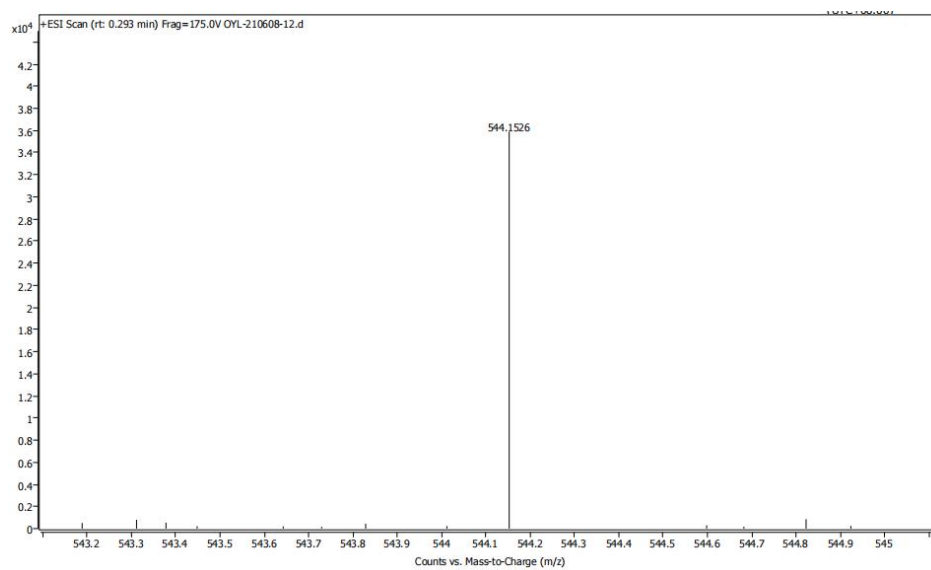



44k

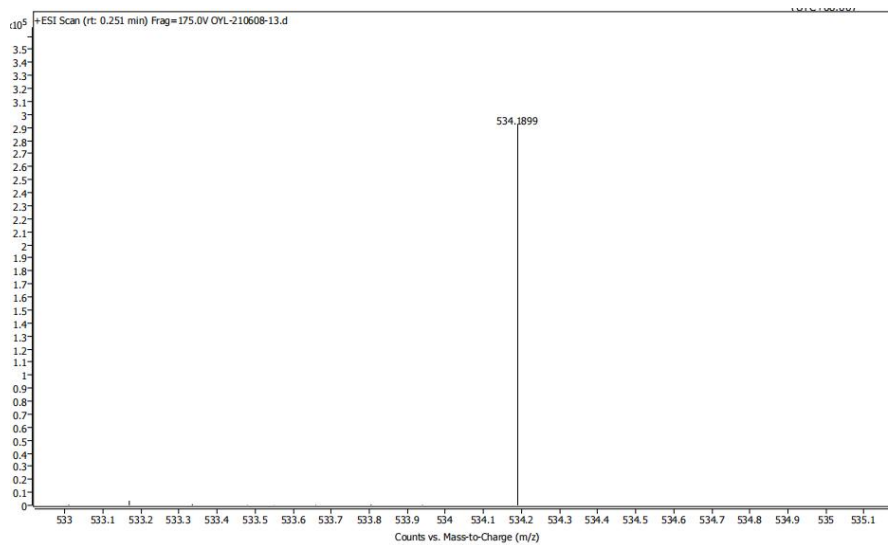

44l

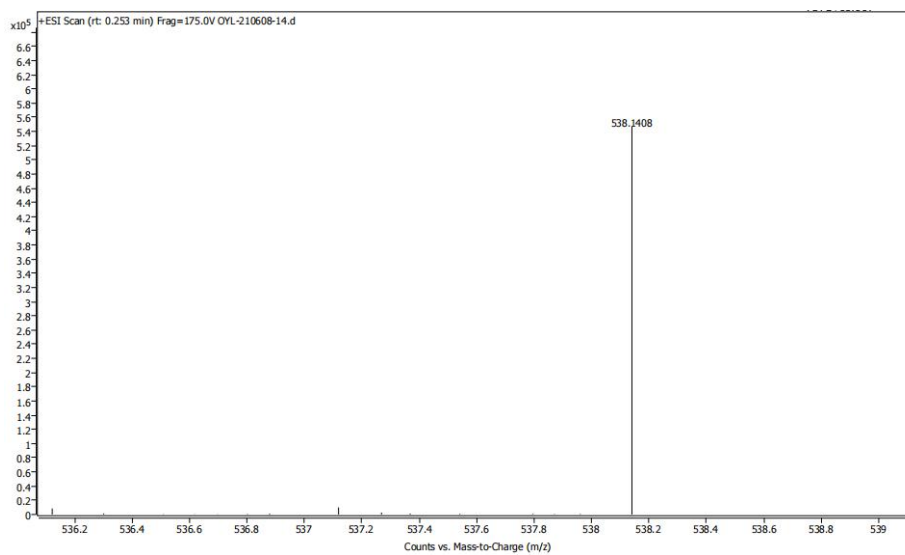

44m

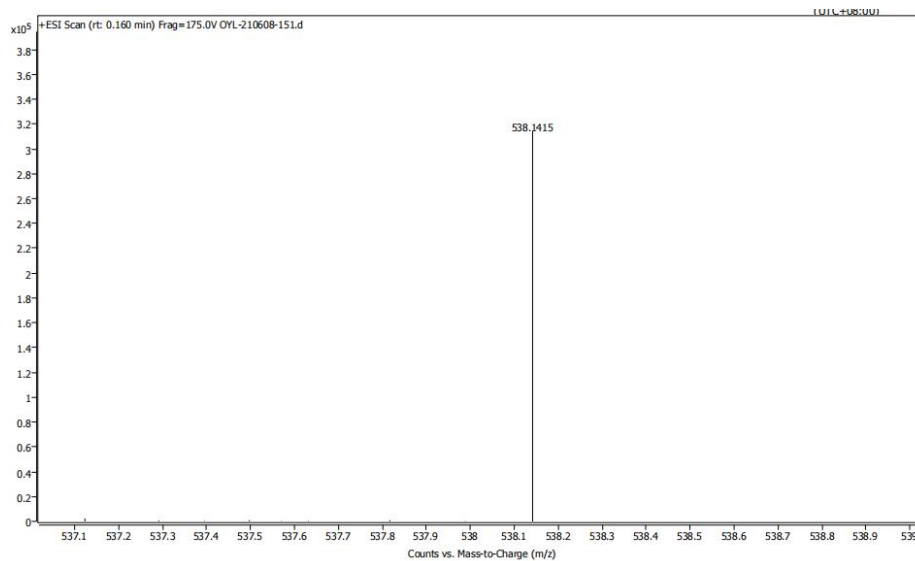

44n

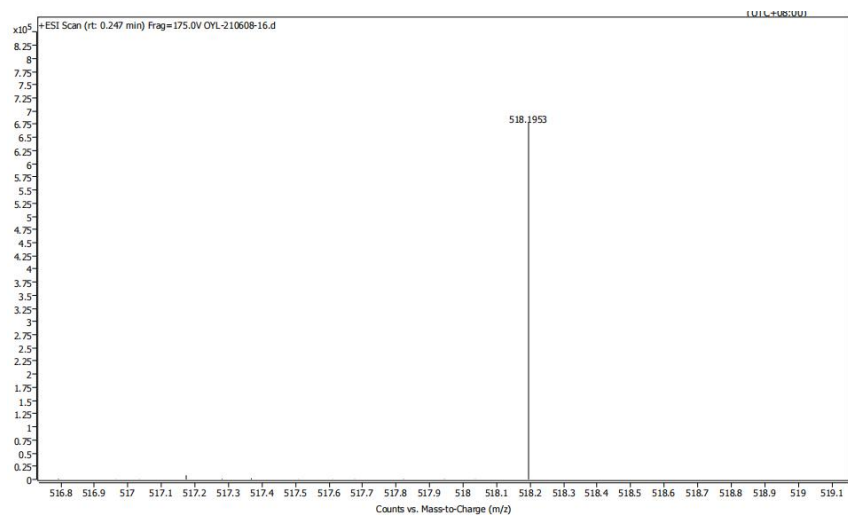

## 4. HPLC data

33a

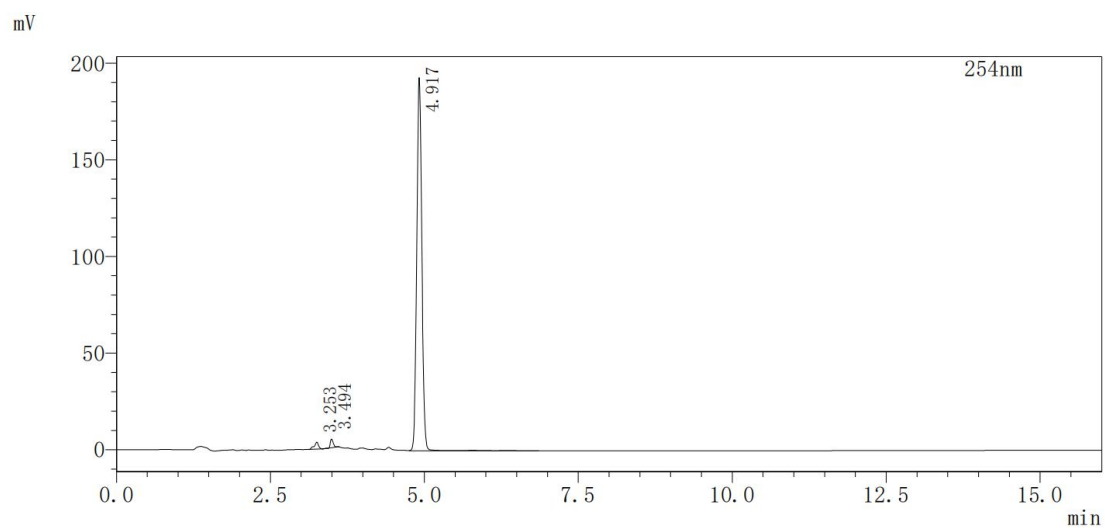

| Peak  | Retention time | Area    | Height | Concentration | Height% |
|-------|----------------|---------|--------|---------------|---------|
| 1     | 3.253          | 17843   | 3620   | 1.554         | 1.798   |
| 2     | 3.494          | 15440   | 4557   | 1.344         | 2.264   |
| 3     | 4.917          | 1115241 | 193095 | 97.102        | 95.937  |
| Total |                | 1148525 | 201273 |               | 100.000 |

### 33b

mV

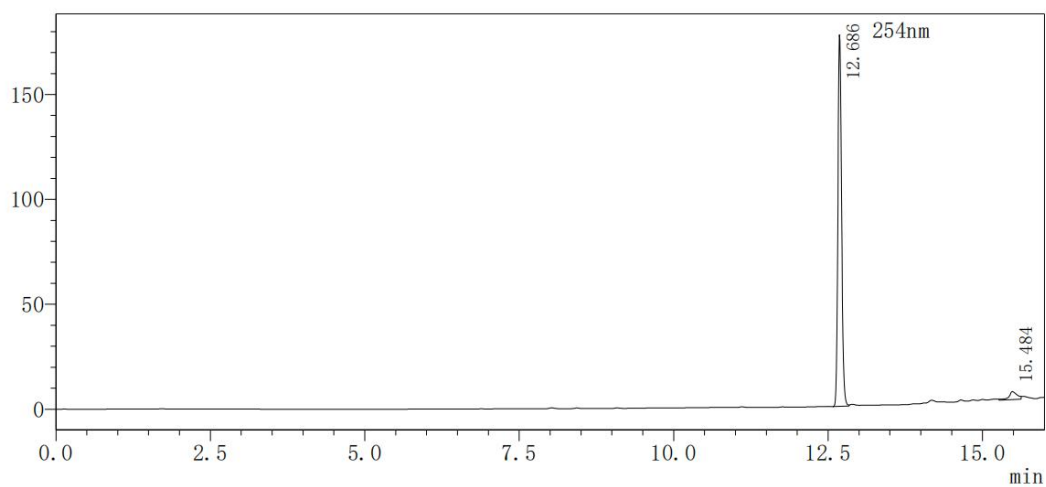

| Peak  | Retention time | Area   | Height | Concentration | Height% |
|-------|----------------|--------|--------|---------------|---------|
| 1     | 12.686         | 733923 | 177088 | 95.213        | 97.862  |
| 2     | 15.484         | 36900  | 3868   | 4.787         | 2.138   |
| Total |                | 770823 | 180956 |               | 100.000 |

### 33c

mV

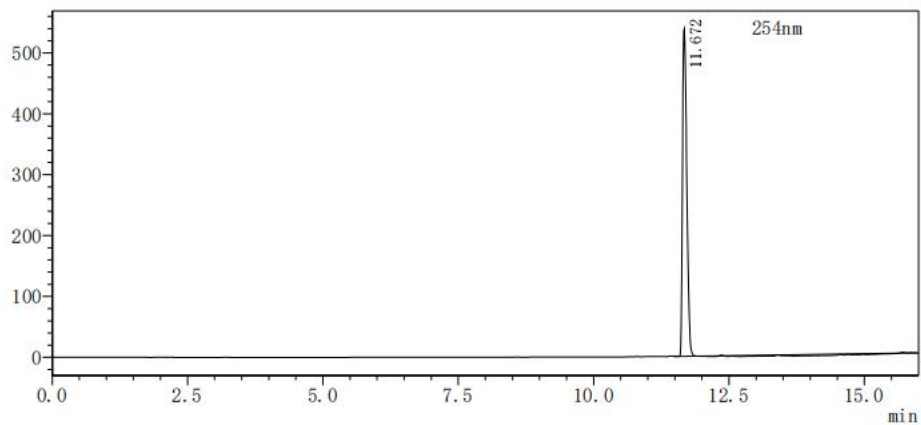

| Peak  | Retention time | Area    | Height | Concentration | Height% |
|-------|----------------|---------|--------|---------------|---------|
| 1     | 11.672         | 2721146 | 537371 | 100.000       | 100.000 |
| Total |                | 2721146 | 537371 |               | 100.000 |

### 33d

mV

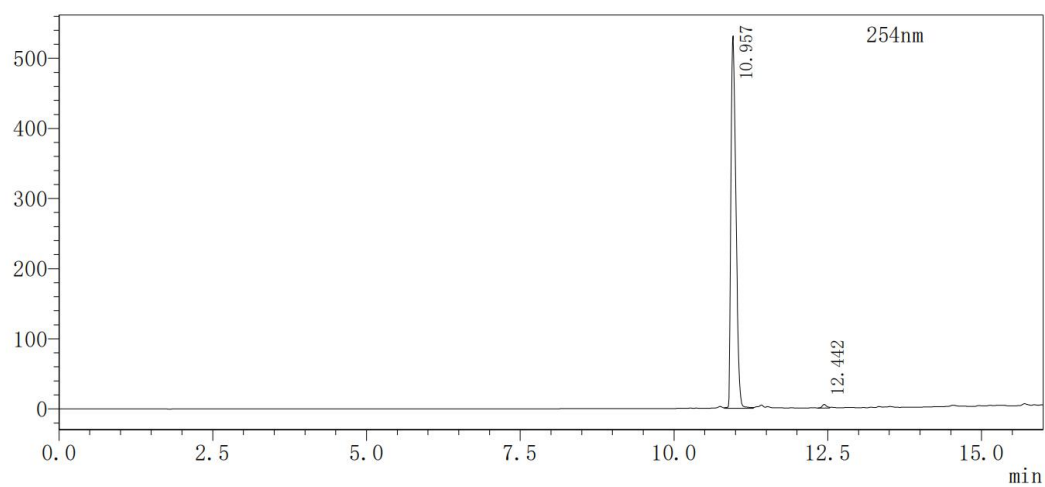

| Peak  | Retention time | Area    | Height | Concentration | Height% |
|-------|----------------|---------|--------|---------------|---------|
| 1     | 10.957         | 3022064 | 531122 | 99.206        | 99.076  |
| 2     | 12.442         | 24185   | 4954   | 0.794         | 0.924   |
| Total |                | 3046250 | 536076 |               | 100.000 |

### 34a

mV

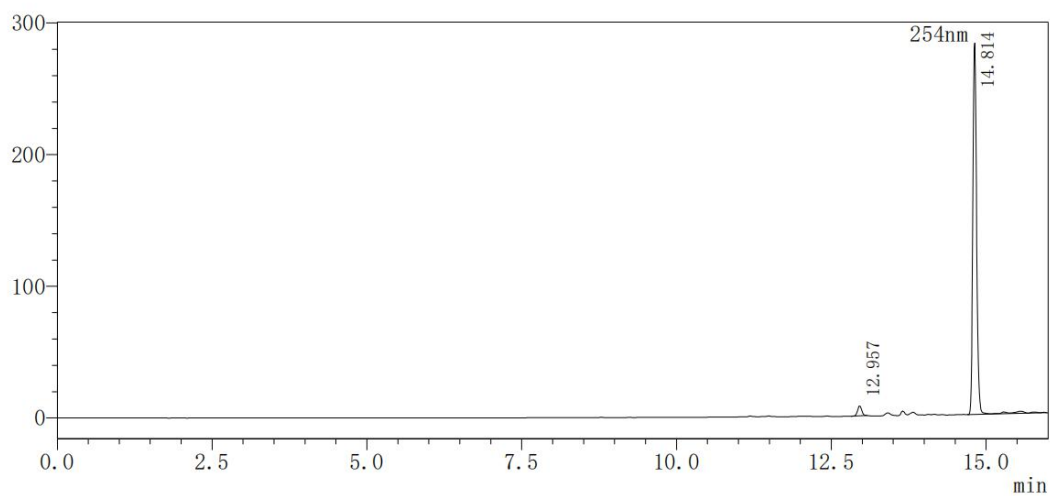

| Peak  | Retention time | Area    | Height | Concentration | Height% |
|-------|----------------|---------|--------|---------------|---------|
| 1     | 12.957         | 34527   | 7449   | 2.796         | 2.573   |
| 2     | 14.814         | 1200497 | 282077 | 97.204        | 97.427  |
| Total |                | 1235024 | 289526 |               | 100.000 |

### 34b

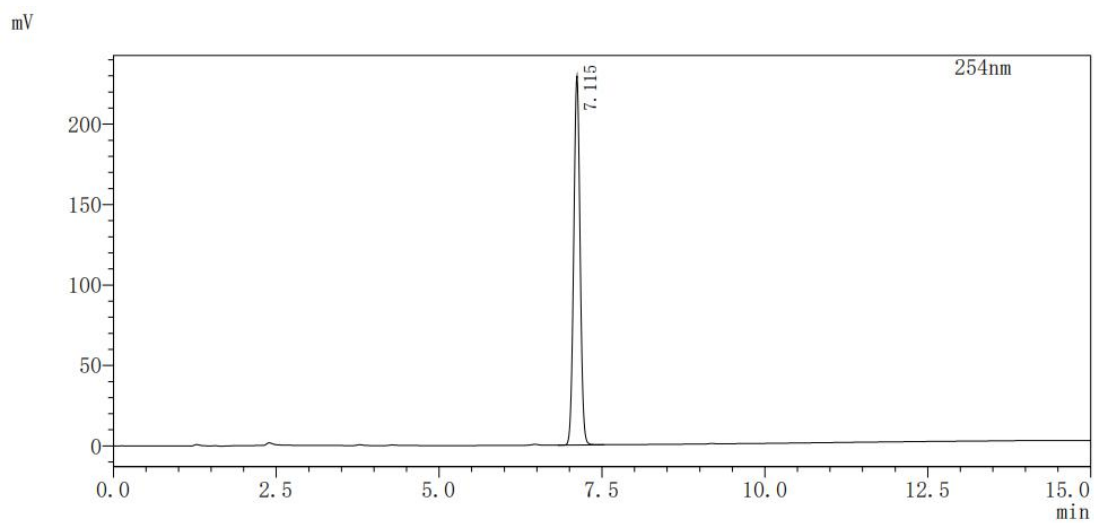

| Peak  | Retention time | Area    | Height | Concentration | Height% |
|-------|----------------|---------|--------|---------------|---------|
| 1     | 7.115          | 1561783 | 229312 | 100.000       | 100.000 |
| Total |                | 1561783 | 229312 |               | 100.000 |

### 34c

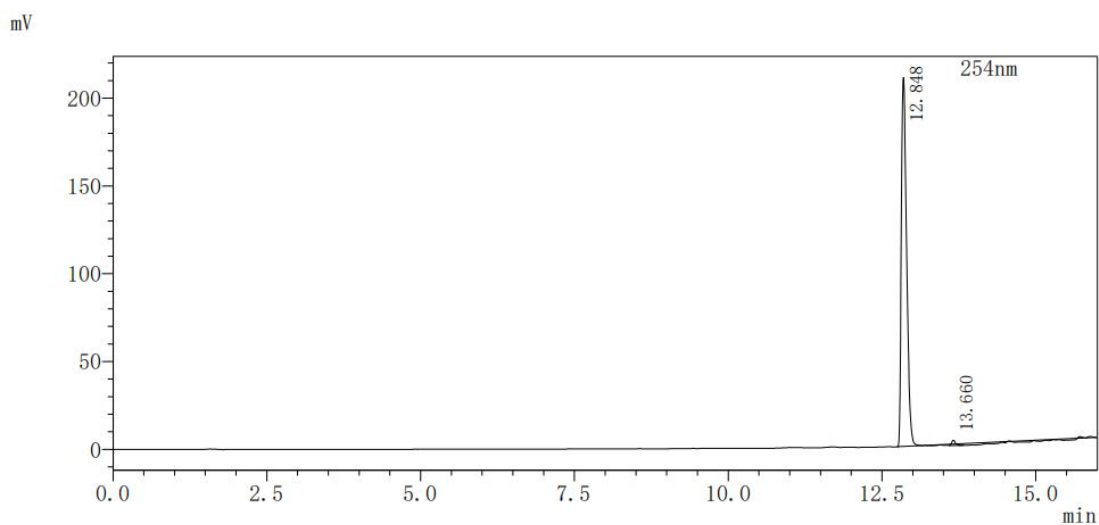

| Peak  | Retention time | Area    | Height | Concentration | Height% |
|-------|----------------|---------|--------|---------------|---------|
| 1     | 12.848         | 1175126 | 210333 | 99.005        | 98.598  |
| 2     | 13.660         | 11812   | 2992   | 0.995         | 1.402   |
| Total |                | 1186938 | 213325 |               | 100.000 |

38a

mV

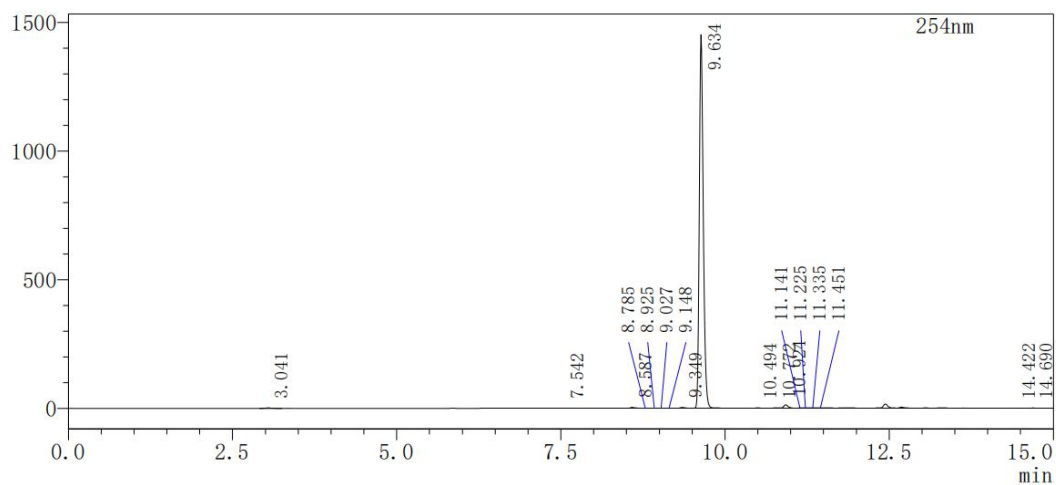

| Peak  | Retention time | Area    | Height  | Area%   | Height% |
|-------|----------------|---------|---------|---------|---------|
| 1     | 3.041          | 9755    | 1897    | 0.152   | 0.128   |
| 2     | 7.542          | 1555    | 152     | 0.024   | 0.010   |
| 3     | 8.587          | 17885   | 3192    | 0.279   | 0.216   |
| 4     | 8.785          | 3179    | 526     | 0.050   | 0.036   |
| 5     | 8.925          | 2191    | 459     | 0.034   | 0.031   |
| 6     | 9.027          | 3782    | 554     | 0.059   | 0.037   |
| 7     | 9.148          | 2834    | 509     | 0.044   | 0.034   |
| 8     | 9.349          | 18942   | 2994    | 0.295   | 0.202   |
| 9     | 9.634          | 6266908 | 1451080 | 97.606  | 98.057  |
| 10    | 10.494         | 3364    | 569     | 0.052   | 0.038   |
| 11    | 10.772         | 4492    | 644     | 0.070   | 0.044   |
| 12    | 10.924         | 60670   | 13133   | 0.945   | 0.887   |
| 13    | 11.141         | 2581    | 563     | 0.040   | 0.038   |
| 14    | 11.225         | 3998    | 925     | 0.062   | 0.063   |
| 15    | 11.335         | 8174    | 1221    | 0.127   | 0.083   |
| 16    | 11.451         | 7287    | 958     | 0.113   | 0.065   |
| 17    | 14.422         | 1558    | 204     | 0.024   | 0.014   |
| 18    | 14.690         | 1437    | 253     | 0.022   | 0.017   |
| Total |                | 6420593 | 1479834 | 100.000 | 100.000 |

### 38b

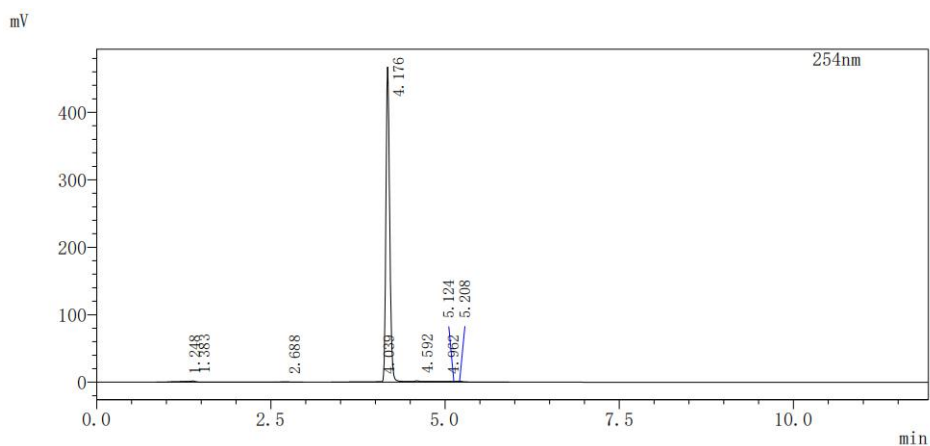

| Peak  | Retention time | Area    | Height | Area%   | Height% |
|-------|----------------|---------|--------|---------|---------|
| 1     | 1.248          | 15007   | 1196   | 0.794   | 0.250   |
| 2     | 1.383          | 12522   | 1790   | 0.663   | 0.374   |
| 3     | 2.688          | 4608    | 513    | 0.244   | 0.107   |
| 4     | 4.039          | 15134   | 767    | 0.801   | 0.161   |
| 5     | 4.176          | 1780515 | 467450 | 94.210  | 97.821  |
| 6     | 4.592          | 22302   | 2026   | 1.180   | 0.424   |
| 7     | 4.962          | 22474   | 1312   | 1.189   | 0.275   |
| 8     | 5.124          | 6151    | 1252   | 0.325   | 0.262   |
| 9     | 5.208          | 11232   | 1558   | 0.594   | 0.326   |
| Total |                | 1889945 | 477864 | 100.000 | 100.000 |

### 38c

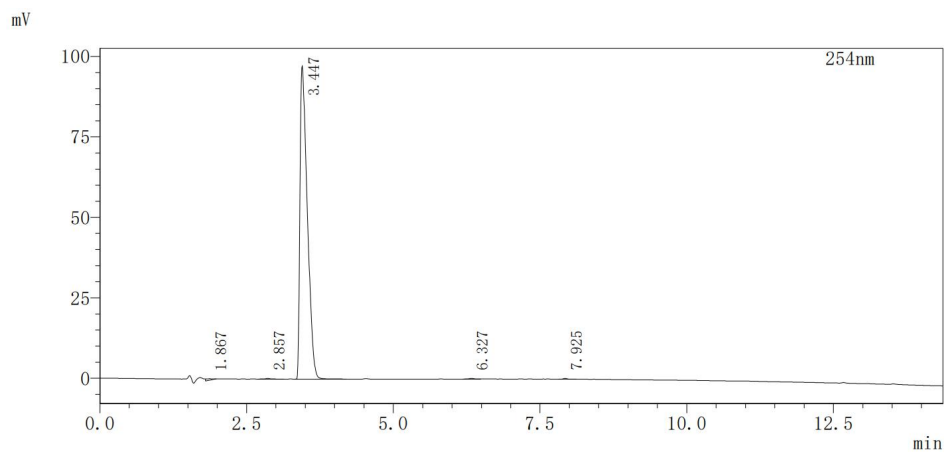

| Peak  | Retention time | Area   | Height | Concentration | Height% |
|-------|----------------|--------|--------|---------------|---------|
| 1     | 1.867          | 3396   | 440    | 0.395         | 0.447   |
| 2     | 2.857          | 1217   | 197    | 0.142         | 0.200   |
| 3     | 3.447          | 851983 | 97275  | 99.193        | 98.880  |
| 4     | 6.327          | 1270   | 212    | 0.148         | 0.216   |
| 5     | 7.925          | 1045   | 252    | 0.122         | 0.256   |
| Total |                | 858911 | 98377  |               | 100.000 |

38d

mV

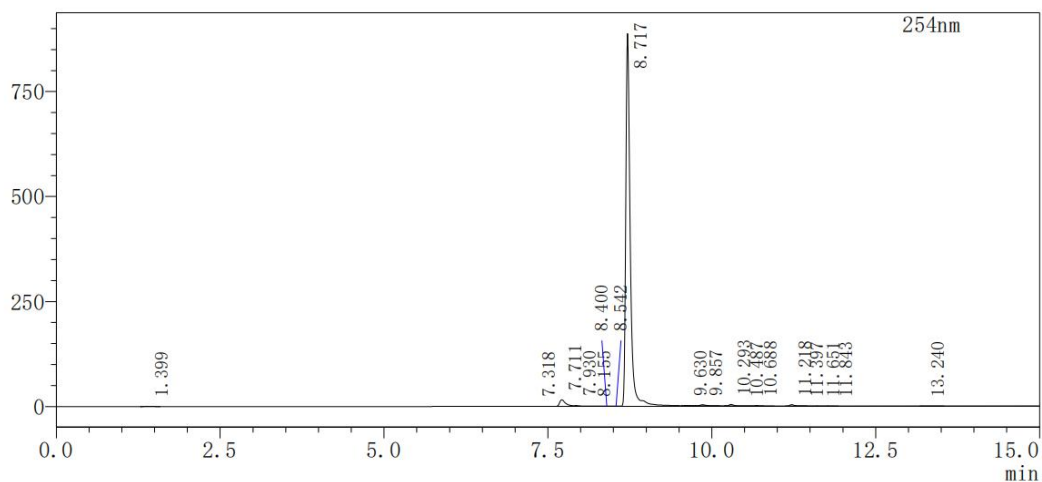

| Peak  | Retention time | Area    | Height | Area%   | Height% |
|-------|----------------|---------|--------|---------|---------|
| 1     | 1.399          | 2371    | 291    | 0.052   | 0.032   |
| 2     | 7.318          | 1094    | 157    | 0.024   | 0.017   |
| 3     | 7.711          | 105740  | 15788  | 2.327   | 1.715   |
| 4     | 7.930          | 16075   | 2168   | 0.354   | 0.236   |
| 5     | 8.155          | 7106    | 689    | 0.156   | 0.075   |
| 6     | 8.400          | 2901    | 467    | 0.064   | 0.051   |
| 7     | 8.542          | 5237    | 731    | 0.115   | 0.079   |
| 8     | 8.717          | 4333296 | 887724 | 95.349  | 96.414  |
| 9     | 9.630          | 2494    | 547    | 0.055   | 0.059   |
| 10    | 9.857          | 15611   | 2534   | 0.344   | 0.275   |
| 11    | 10.293         | 17405   | 3566   | 0.383   | 0.387   |
| 12    | 10.487         | 2874    | 444    | 0.063   | 0.048   |
| 13    | 10.688         | 6119    | 1086   | 0.135   | 0.118   |
| 14    | 11.218         | 17509   | 3348   | 0.385   | 0.364   |
| 15    | 11.397         | 4890    | 605    | 0.108   | 0.066   |
| 16    | 11.651         | 1071    | 173    | 0.024   | 0.019   |
| 17    | 11.843         | 1021    | 155    | 0.022   | 0.017   |
| 18    | 13.240         | 1834    | 266    | 0.040   | 0.029   |
| Total |                | 4544648 | 920739 | 100.000 | 100.000 |



### 38e

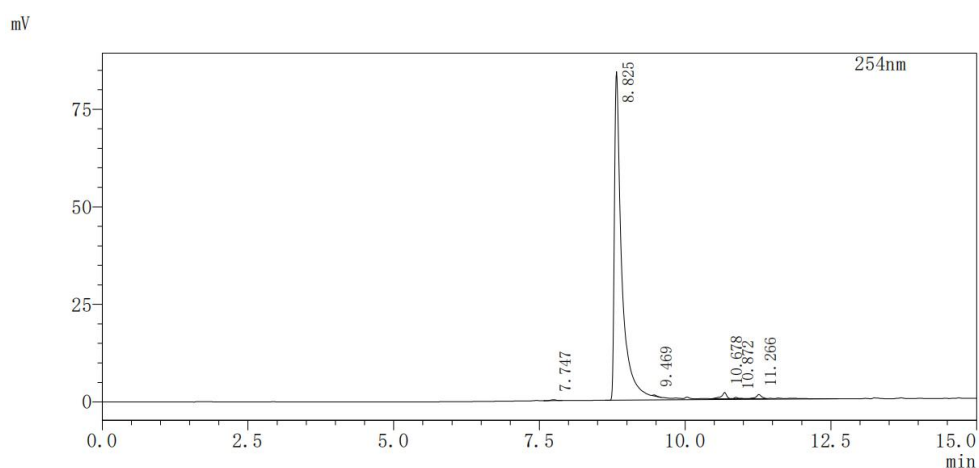

| Peak  | Retention time | Area   | Height | Area%   | Height% |
|-------|----------------|--------|--------|---------|---------|
| 1     | 7.747          | 1686   | 243    | 0.209   | 0.276   |
| 2     | 8.825          | 782472 | 84208  | 97.077  | 95.885  |
| 3     | 9.469          | 1011   | 270    | 0.125   | 0.307   |
| 4     | 10.678         | 10400  | 1617   | 1.290   | 1.841   |
| 5     | 10.872         | 2262   | 369    | 0.281   | 0.420   |
| 6     | 11.266         | 8201   | 1116   | 1.017   | 1.270   |
| Total |                | 806032 | 87821  | 100.000 | 100.000 |

### 38f

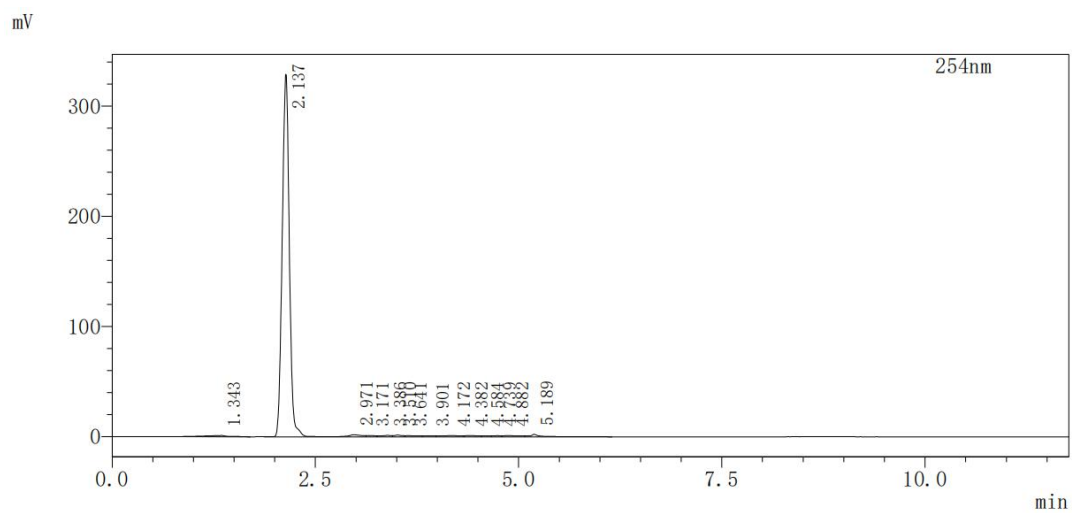

| Peak  | Retention time | Area    | Height | Height% |
|-------|----------------|---------|--------|---------|
| 1     | 1.343          | 26596   | 1237   | 0.358   |
| 2     | 2.137          | 1998517 | 328621 | 95.153  |
| 3     | 2.971          | 23611   | 1941   | 0.562   |
| 4     | 3.171          | 8240    | 1096   | 0.317   |
| 5     | 3.386          | 12519   | 1337   | 0.387   |
| 6     | 3.510          | 11152   | 1606   | 0.465   |
| 7     | 3.641          | 12311   | 1026   | 0.297   |
| 8     | 3.901          | 9091    | 938    | 0.272   |
| 9     | 4.172          | 19573   | 1063   | 0.308   |
| 10    | 4.382          | 13118   | 1197   | 0.347   |
| 11    | 4.584          | 6789    | 936    | 0.271   |
| 12    | 4.739          | 7110    | 1004   | 0.291   |
| 13    | 4.882          | 15948   | 1076   | 0.312   |
| 14    | 5.189          | 21652   | 2280   | 0.660   |
| Total |                | 2186229 | 345359 | 100.000 |

38g

mV

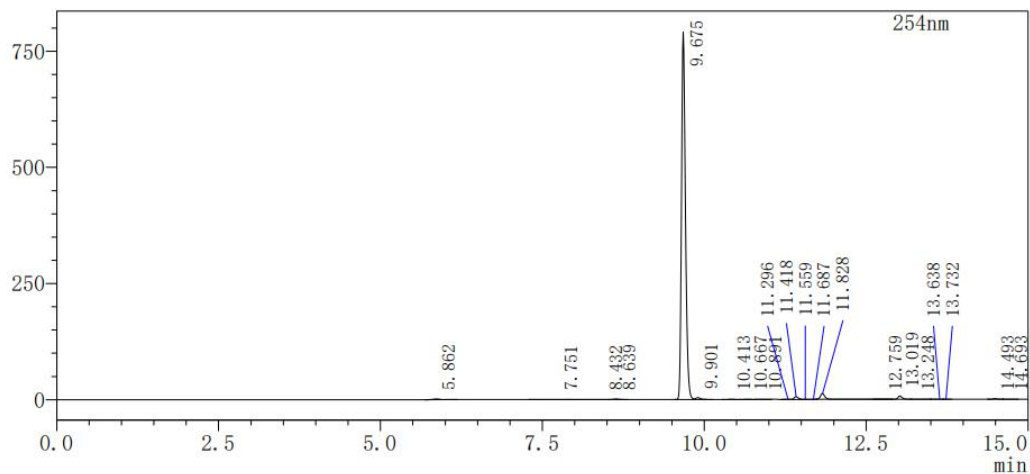

| Peak  | Retention time | Area    | Height | Area%   | Height% |
|-------|----------------|---------|--------|---------|---------|
| 1     | 5.862          | 11496   | 1445   | 0.325   | 0.174   |
| 2     | 7.751          | 3362    | 320    | 0.095   | 0.039   |
| 3     | 8.432          | 5895    | 259    | 0.167   | 0.031   |
| 4     | 8.639          | 7087    | 1218   | 0.201   | 0.147   |
| 5     | 9.675          | 3338456 | 791599 | 94.465  | 95.457  |
| 6     | 9.901          | 19849   | 3947   | 0.562   | 0.476   |
| 7     | 10.413         | 1625    | 194    | 0.046   | 0.023   |
| 8     | 10.667         | 1461    | 208    | 0.041   | 0.025   |
| 9     | 10.891         | 3910    | 598    | 0.111   | 0.072   |
| 10    | 11.296         | 1157    | 211    | 0.033   | 0.025   |
| 11    | 11.418         | 26460   | 5854   | 0.749   | 0.706   |
| 12    | 11.559         | 2884    | 661    | 0.082   | 0.080   |
| 13    | 11.687         | 1796    | 413    | 0.051   | 0.050   |
| 14    | 11.828         | 63323   | 12641  | 1.792   | 1.524   |
| 15    | 12.759         | 1069    | 127    | 0.030   | 0.015   |
| 16    | 13.019         | 32942   | 7351   | 0.932   | 0.886   |
| 17    | 13.248         | 2778    | 416    | 0.079   | 0.050   |
| 18    | 13.638         | 1041    | 172    | 0.029   | 0.021   |
| 19    | 13.732         | 1187    | 262    | 0.034   | 0.032   |
| 20    | 14.493         | 5276    | 1187   | 0.149   | 0.143   |
| 21    | 14.693         | 1031    | 196    | 0.029   | 0.024   |
| Total |                | 3534081 | 829277 | 100.000 | 100.000 |

38h

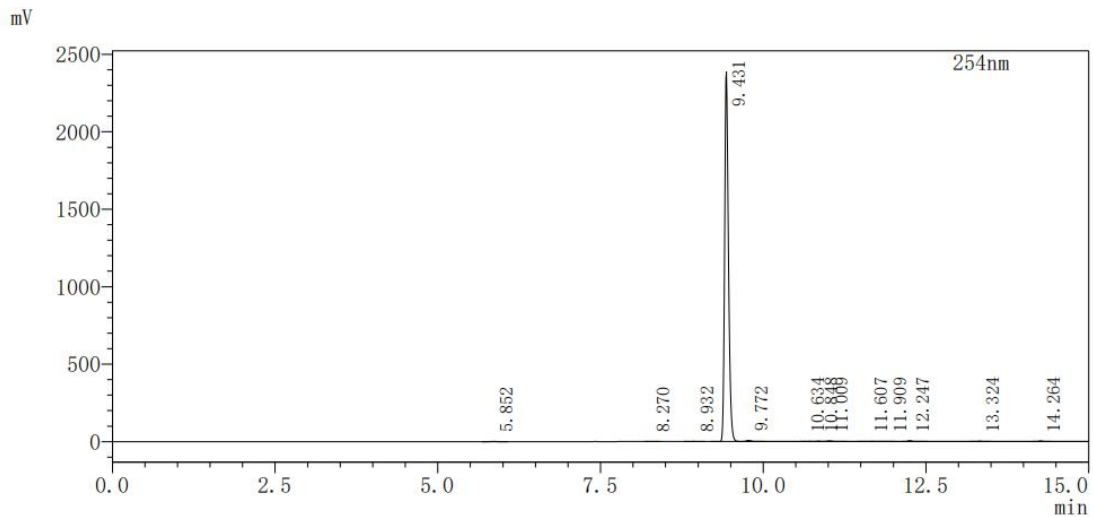

| Peak  | Retention time | Area    | Height  | Height% |
|-------|----------------|---------|---------|---------|
| 1     | 5.852          | 4751    | 700     | 0.048   |
| 2     | 8.270          | 1550    | 360     | 0.016   |
| 3     | 8.932          | 7358    | 1615    | 0.075   |
| 4     | 9.431          | 9709719 | 2388428 | 98.586  |
| 5     | 9.772          | 33100   | 6862    | 0.336   |
| 6     | 10.634         | 1402    | 280     | 0.014   |
| 7     | 10.848         | 12460   | 2850    | 0.127   |
| 8     | 11.009         | 26548   | 4700    | 0.270   |
| 9     | 11.607         | 1111    | 123     | 0.011   |
| 10    | 11.909         | 3580    | 244     | 0.036   |
| 11    | 12.247         | 24711   | 5347    | 0.251   |
| 12    | 13.324         | 8751    | 1727    | 0.089   |
| 13    | 14.264         | 13960   | 3379    | 0.142   |
| Total |                | 9849003 | 2416617 | 100.000 |

38i

mV

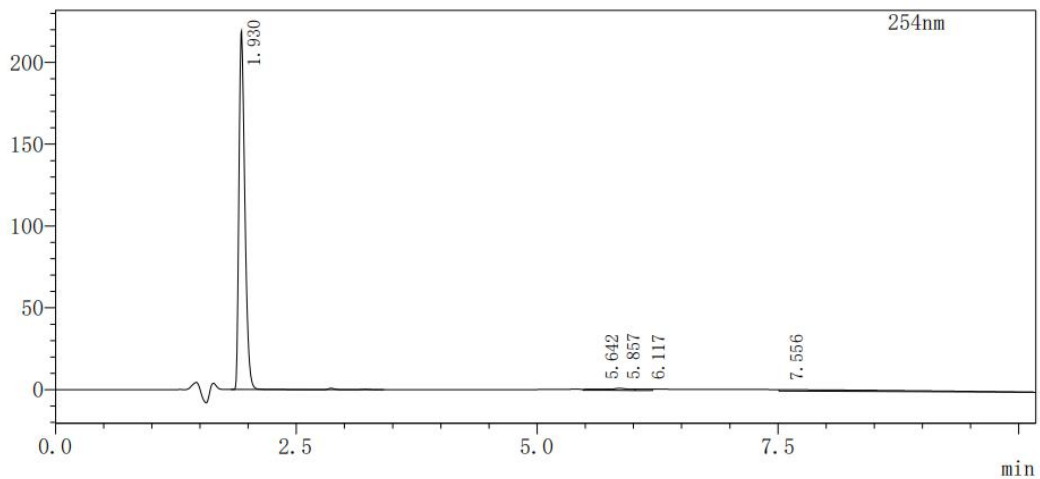

| Peak  | Retention time | Area    | Height | Concentration | Height% |
|-------|----------------|---------|--------|---------------|---------|
| 1     | 1.930          | 959773  | 218892 | 88.939        | 98.426  |
| 2     | 5.642          | 9280    | 599    | 0.860         | 0.269   |
| 3     | 5.857          | 14328   | 1239   | 1.328         | 0.557   |
| 4     | 6.117          | 8126    | 748    | 0.753         | 0.336   |
| 5     | 7.556          | 87633   | 915    | 8.121         | 0.412   |
| Total |                | 1079140 | 222393 |               | 100.000 |

38j

mV

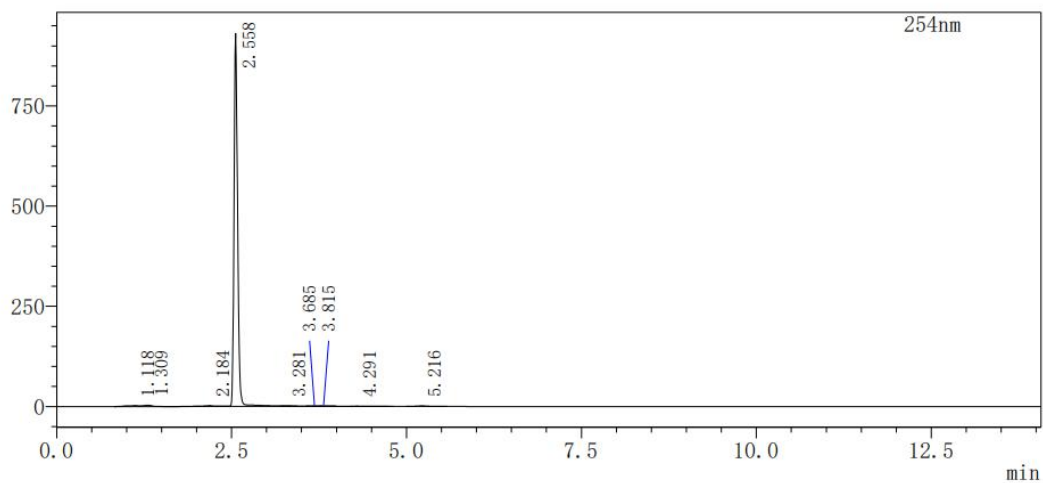

| Peak  | Retention time | Area    | Height | Height% |
|-------|----------------|---------|--------|---------|
| 1     | 1.118          | 30956   | 2615   | 0.278   |
| 2     | 1.309          | 30888   | 3206   | 0.340   |
| 3     | 2.184          | 34541   | 2353   | 0.250   |
| 4     | 2.558          | 3390611 | 931474 | 98.839  |
| 5     | 3.281          | 3696    | 583    | 0.062   |
| 6     | 3.685          | 1300    | 164    | 0.017   |
| 7     | 3.815          | 1892    | 437    | 0.046   |
| 8     | 4.291          | 1103    | 74     | 0.008   |
| 9     | 5.216          | 11351   | 1513   | 0.161   |
| Total |                | 3506338 | 942420 | 100.000 |

38k

mV

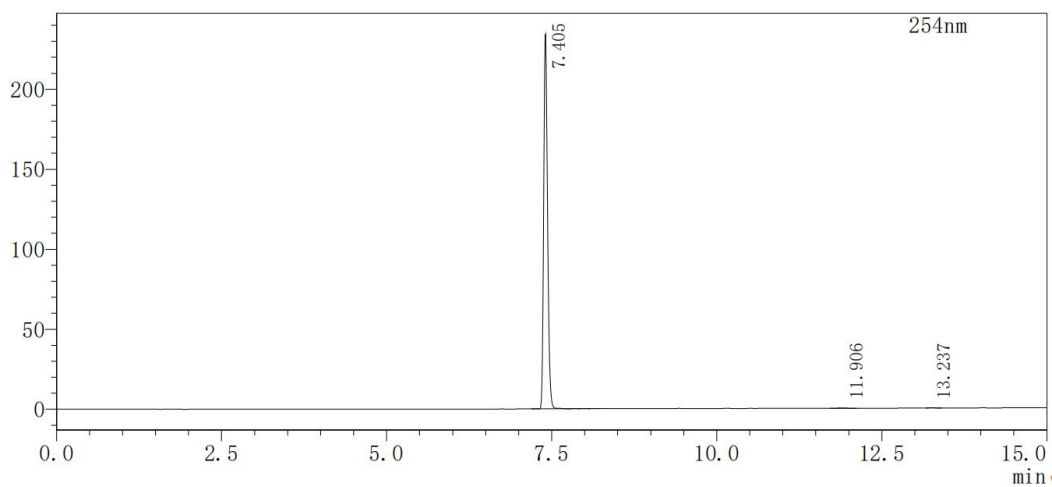

| Peak  | Retention time | Area   | Height | Area%   | Height% |
|-------|----------------|--------|--------|---------|---------|
| 1     | 7.405          | 951766 | 234227 | 99.701  | 99.834  |
| 2     | 11.906         | 1524   | 149    | 0.160   | 0.063   |
| 3     | 13.237         | 1335   | 240    | 0.140   | 0.102   |
| Total |                | 954625 | 234615 | 100.000 | 100.000 |

**38l**

mV

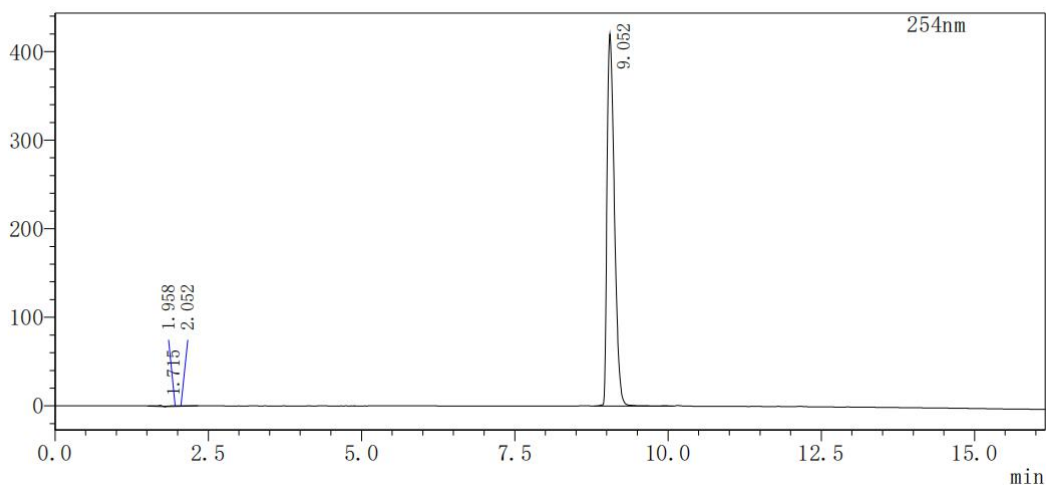

| Peak  | Retention time | Area    | Height | Concentration | Height% |
|-------|----------------|---------|--------|---------------|---------|
| 1     | 1.715          | 6170    | 1121   | 0.175         | 0.266   |
| 2     | 1.958          | 6435    | 687    | 0.183         | 0.163   |
| 3     | 2.052          | 4302    | 489    | 0.122         | 0.116   |
| 4     | 9.052          | 3504065 | 419960 | 99.520        | 99.456  |
| Total |                | 3520971 | 422258 |               | 100.000 |

**38m**

mV

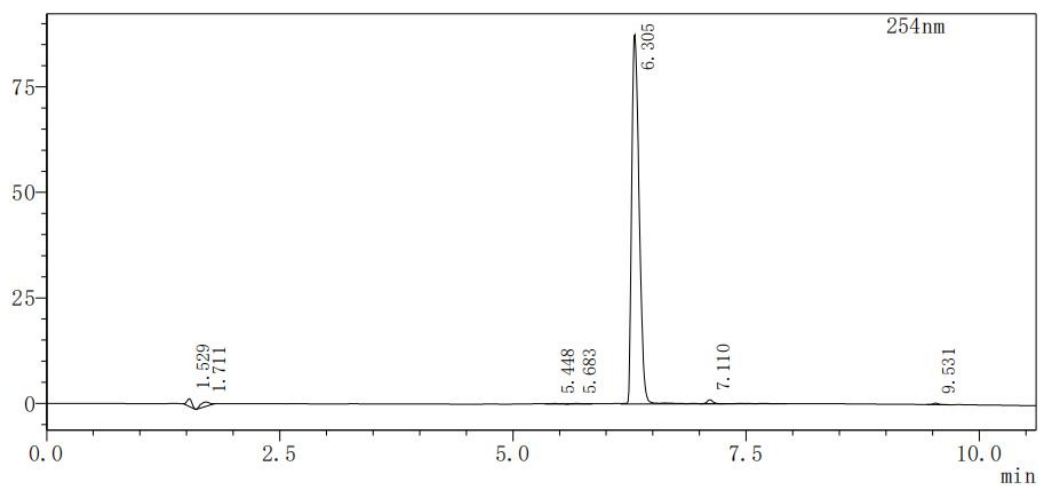

| Peak  | Retention time | Area   | Height | Area%   | Height% |
|-------|----------------|--------|--------|---------|---------|
| 1     | 1.529          | 6322   | 1802   | 1.241   | 1.963   |
| 2     | 1.711          | 7451   | 1002   | 1.463   | 1.092   |
| 3     | 5.448          | 1084   | 125    | 0.213   | 0.136   |
| 4     | 5.683          | 1154   | 126    | 0.227   | 0.137   |
| 5     | 6.305          | 488127 | 87482  | 95.842  | 95.296  |
| 6     | 7.110          | 3780   | 922    | 0.742   | 1.005   |
| 7     | 9.531          | 1384   | 342    | 0.272   | 0.372   |
| Total |                | 509301 | 91800  | 100.000 | 100.000 |

**38n**

mV

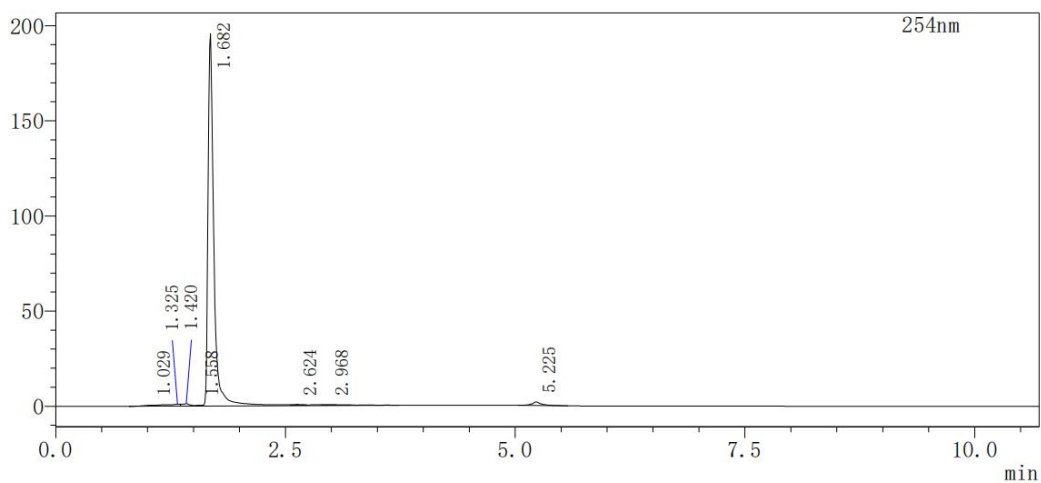

| Peak  | Retention time | Area   | Height | Height% |
|-------|----------------|--------|--------|---------|
| 1     | 1.029          | 3578   | 485    | 0.241   |
| 2     | 1.325          | 12788  | 962    | 0.479   |
| 3     | 1.420          | 7081   | 1229   | 0.612   |
| 4     | 1.558          | 1773   | 389    | 0.194   |
| 5     | 1.682          | 873287 | 195576 | 97.371  |
| 6     | 2.624          | 1005   | 224    | 0.111   |
| 7     | 2.968          | 1506   | 130    | 0.065   |
| 8     | 5.225          | 12948  | 1862   | 0.927   |
| Total |                | 913966 | 200856 | 100.000 |

38o

mV

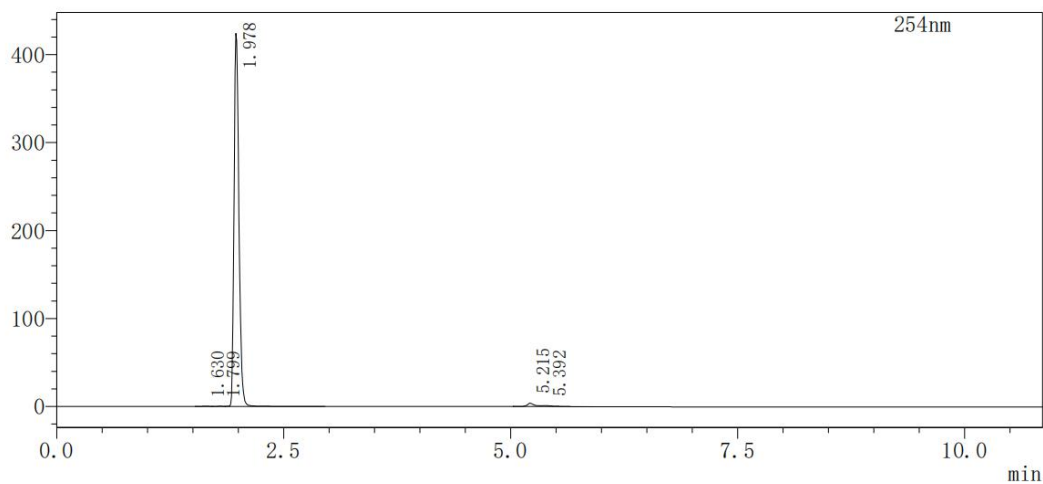

| Peak  | Retention time | Area    | Height | Area%   | Height% |
|-------|----------------|---------|--------|---------|---------|
| 1     | 1.630          | 1643    | 372    | 0.102   | 0.087   |
| 2     | 1.799          | 1318    | 188    | 0.082   | 0.044   |
| 3     | 1.978          | 1575032 | 424241 | 97.854  | 98.729  |
| 4     | 5.215          | 21187   | 3882   | 1.316   | 0.903   |
| 5     | 5.392          | 10395   | 1020   | 0.646   | 0.237   |
| Total |                | 1609575 | 429702 | 100.000 | 100.000 |

38p

mV

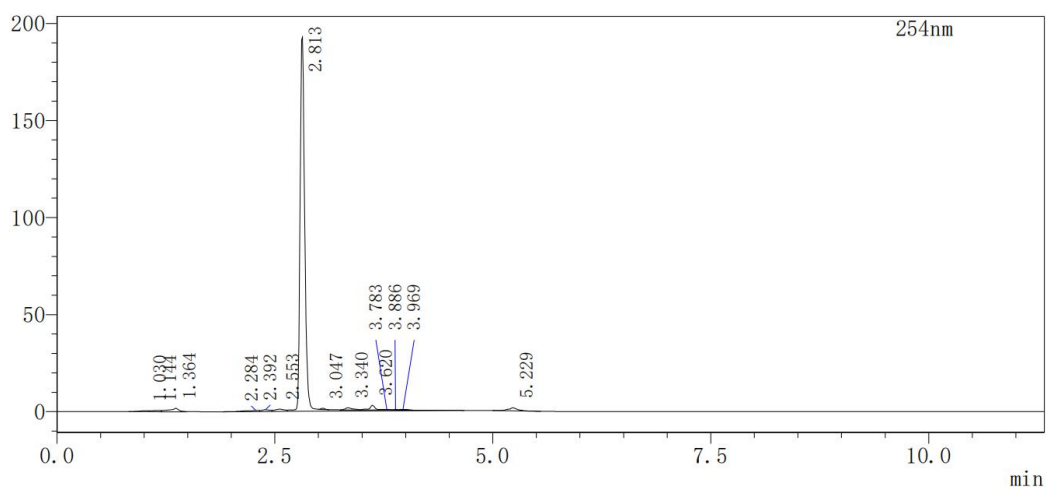



| Peak  | Retention time | Area   | Height | Height% |
|-------|----------------|--------|--------|---------|
| 1     | 1.030          | 4226   | 527    | 0.257   |
| 2     | 1.144          | 5120   | 646    | 0.315   |
| 3     | 1.364          | 14115  | 1761   | 0.859   |
| 4     | 2.284          | 7007   | 584    | 0.285   |
| 5     | 2.392          | 6032   | 910    | 0.444   |
| 6     | 2.553          | 9216   | 1183   | 0.577   |
| 7     | 2.813          | 746156 | 192697 | 94.001  |
| 8     | 3.047          | 1746   | 588    | 0.287   |
| 9     | 3.340          | 6622   | 1098   | 0.536   |
| 10    | 3.620          | 10523  | 2373   | 1.158   |
| 11    | 3.783          | 2726   | 396    | 0.193   |
| 12    | 3.886          | 1393   | 316    | 0.154   |
| 13    | 3.969          | 2753   | 376    | 0.184   |
| 14    | 5.229          | 11809  | 1540   | 0.751   |
| Total |                | 829443 | 204995 | 100.000 |

38q

mV

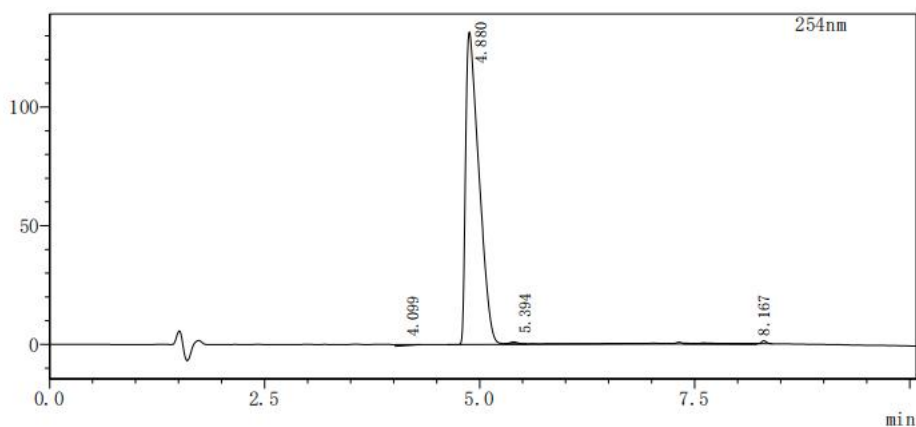

| Peak  | Retention time | Area    | Height  | Concentration | Height% |
|-------|----------------|---------|---------|---------------|---------|
| 1     | 4.099          | 6364    | 538     | 0.429         | 0.404   |
| 2     | 4.880          | 1456929 | 131545  | 98.288        | 98.840  |
| 3     | 5.394          | 4332    | 764     | 0.292         | 0.574   |
| 4     | 8.167          | 14683   | 242     | 0.991         | 0.182   |
| Total |                |         | 1482307 | 133089        | 100.000 |

### 38r

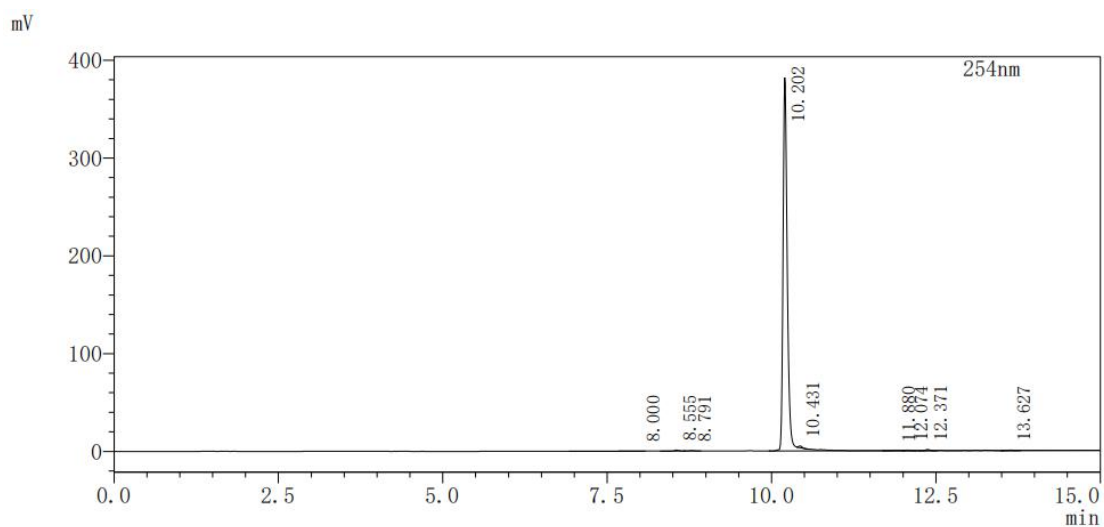

| Peak  | Retention time | Area    | Height | Area%   | Height% |
|-------|----------------|---------|--------|---------|---------|
| 1     | 8.000          | 4682    | 98     | 0.262   | 0.025   |
| 2     | 8.555          | 6473    | 1017   | 0.362   | 0.262   |
| 3     | 8.791          | 3574    | 483    | 0.200   | 0.125   |
| 4     | 10.202         | 1753587 | 381815 | 98.143  | 98.561  |
| 5     | 10.431         | 5818    | 1699   | 0.326   | 0.439   |
| 6     | 11.880         | 2874    | 258    | 0.161   | 0.067   |
| 7     | 12.074         | 2207    | 444    | 0.124   | 0.115   |
| 8     | 12.371         | 4978    | 1112   | 0.279   | 0.287   |
| 9     | 13.627         | 2580    | 463    | 0.144   | 0.120   |
| Total |                | 1786774 | 387389 | 100.000 | 100.000 |

### 38s

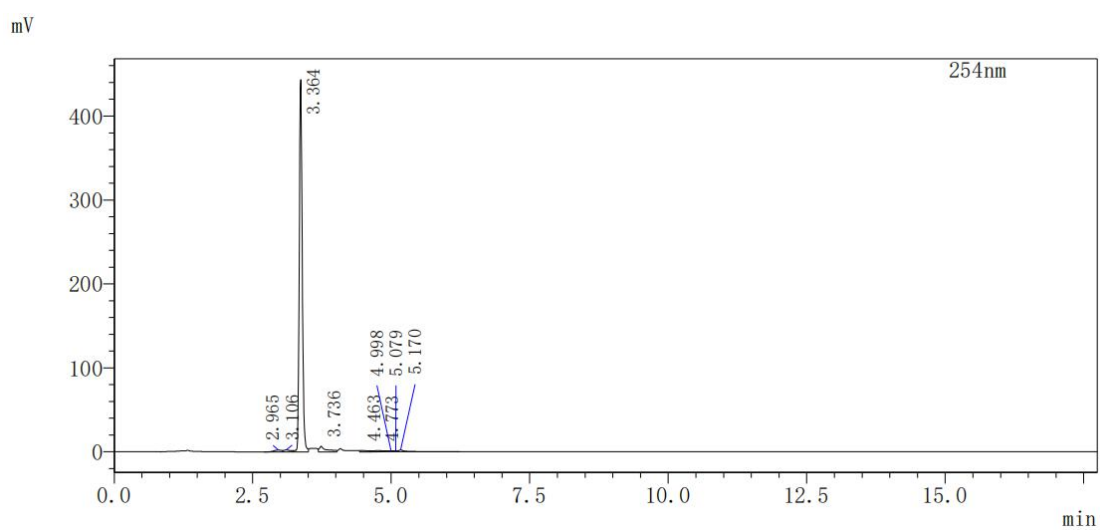

| Peak  | Retention time | Area    | Height | Concentration | Height% |
|-------|----------------|---------|--------|---------------|---------|
| 1     | 2.965          | 21086   | 2101   | 1.141         | 0.454   |
| 2     | 3.106          | 19805   | 2356   | 1.072         | 0.510   |
| 3     | 3.364          | 1672624 | 443553 | 90.523        | 95.922  |
| 4     | 3.736          | 60397   | 6545   | 3.269         | 1.415   |
| 5     | 4.463          | 16531   | 1658   | 0.895         | 0.358   |
| 6     | 4.773          | 20130   | 1355   | 1.089         | 0.293   |
| 7     | 4.998          | 9676    | 1230   | 0.524         | 0.266   |
| 8     | 5.079          | 5364    | 1202   | 0.290         | 0.260   |
| 9     | 5.170          | 22119   | 2408   | 1.197         | 0.521   |
| Total |                | 1847732 | 462409 |               | 100.000 |

26

mV

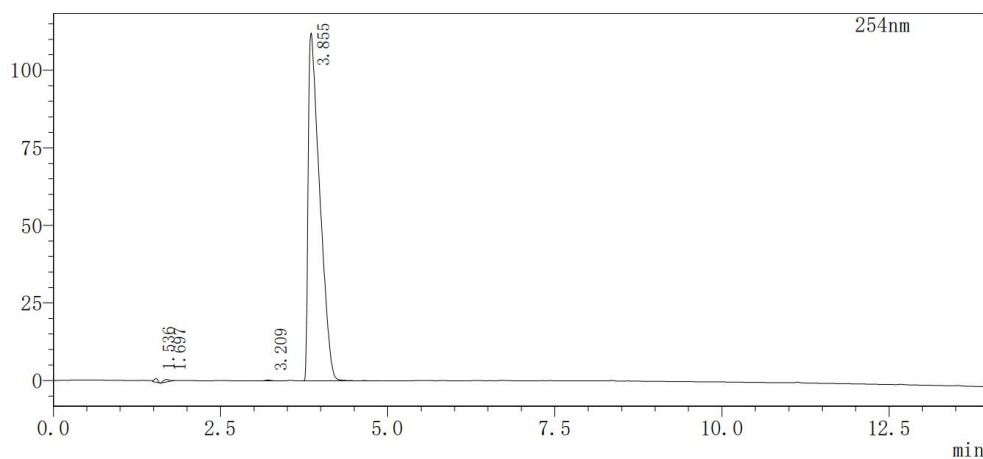

| Peak  | Retention time | Area    | Height | Height% |
|-------|----------------|---------|--------|---------|
| 1     | 1.536          | 4277    | 1166   | 1.020   |
| 2     | 1.697          | 5109    | 778    | 0.681   |
| 3     | 3.209          | 1617    | 285    | 0.250   |
| 4     | 3.855          | 1347736 | 112051 | 98.049  |
| Total |                | 1358739 | 114281 | 100.000 |

42a

mV

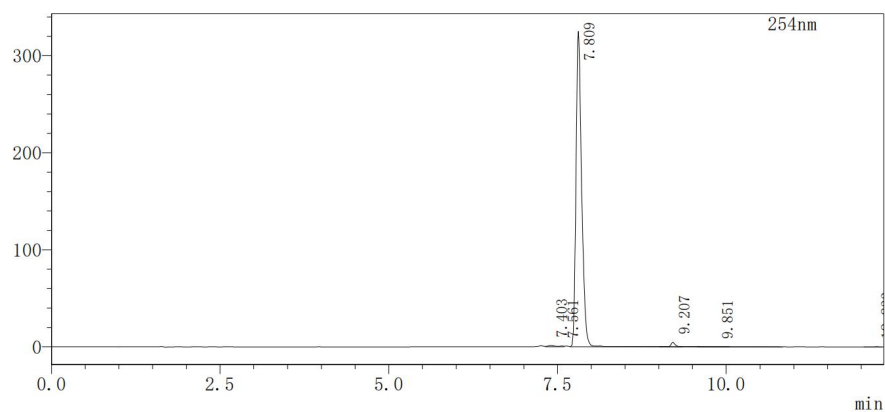

| Peak  | Retention time | Area    | Height | Area%   | Height% |
|-------|----------------|---------|--------|---------|---------|
| 1     | 7.403          | 10235   | 1295   | 0.526   | 0.390   |
| 2     | 7.561          | 3604    | 902    | 0.185   | 0.272   |
| 3     | 7.809          | 1912438 | 325052 | 98.215  | 97.935  |
| 4     | 9.207          | 18292   | 4370   | 0.939   | 1.317   |
| 5     | 9.851          | 1381    | 79     | 0.071   | 0.024   |
| 6     | 12.233         | 1245    | 209    | 0.064   | 0.063   |
| Total |                | 1947195 | 331907 | 100.000 | 100.000 |

### 42b

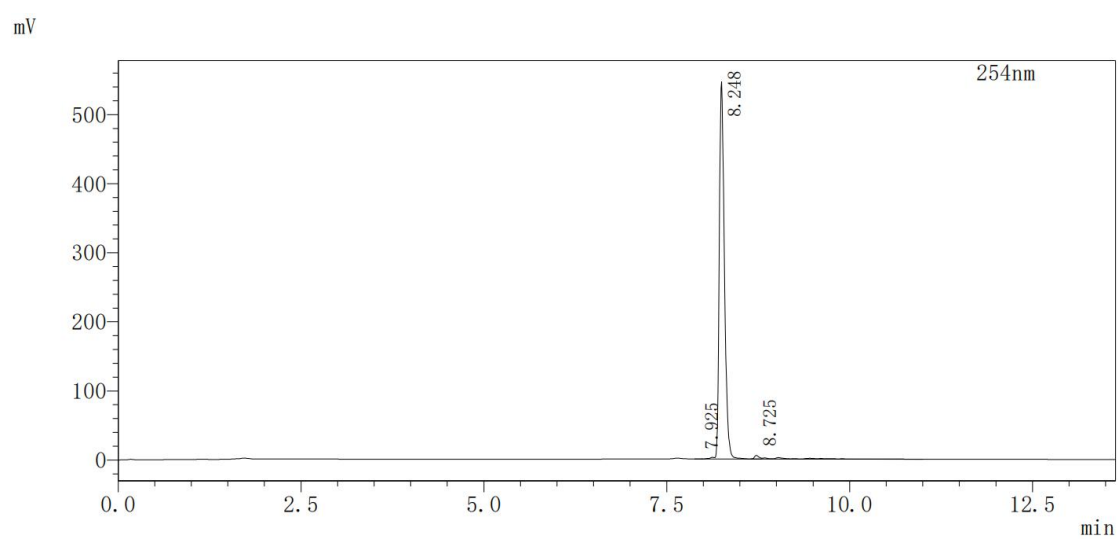

| Peak  | Retention time | Area    | Height | Concentration | Height% |
|-------|----------------|---------|--------|---------------|---------|
| 1     | 7.925          | 1130    | 218    | 2.074         | 0.039   |
| 2     | 8.248          | 2741957 | 546177 | 2.761         | 99.053  |
| 3     | 8.725          | 21013   | 5002   | 95.165        | 0.907   |
| Total |                | 2764100 | 551397 |               | 100.000 |

### 42c

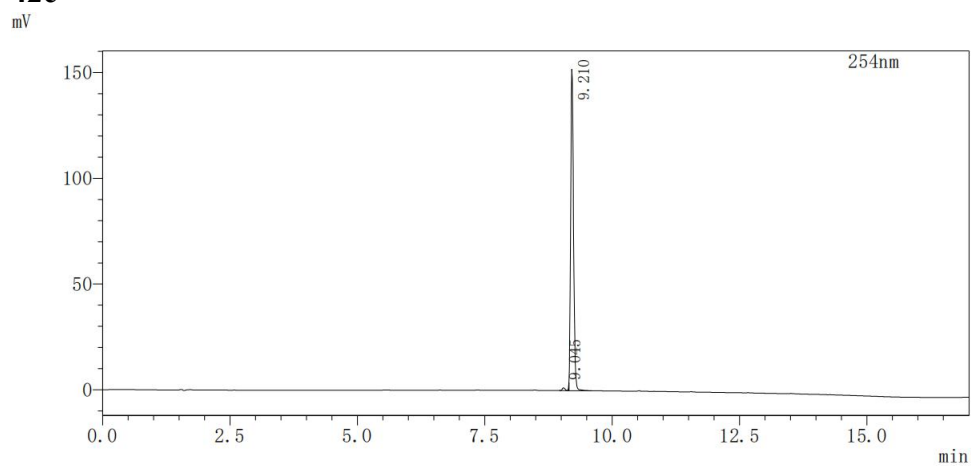

| Peak  | Retention time | Area   | Height | Concentration | Height% |
|-------|----------------|--------|--------|---------------|---------|
| 1     | 9.045          | 7848   | 1355   | 1.310         | 0.884   |
| 2     | 9.210          | 591005 | 151953 | 98.690        | 99.116  |
| Total |                | 598852 | 153309 |               | 100.000 |

#### 42d

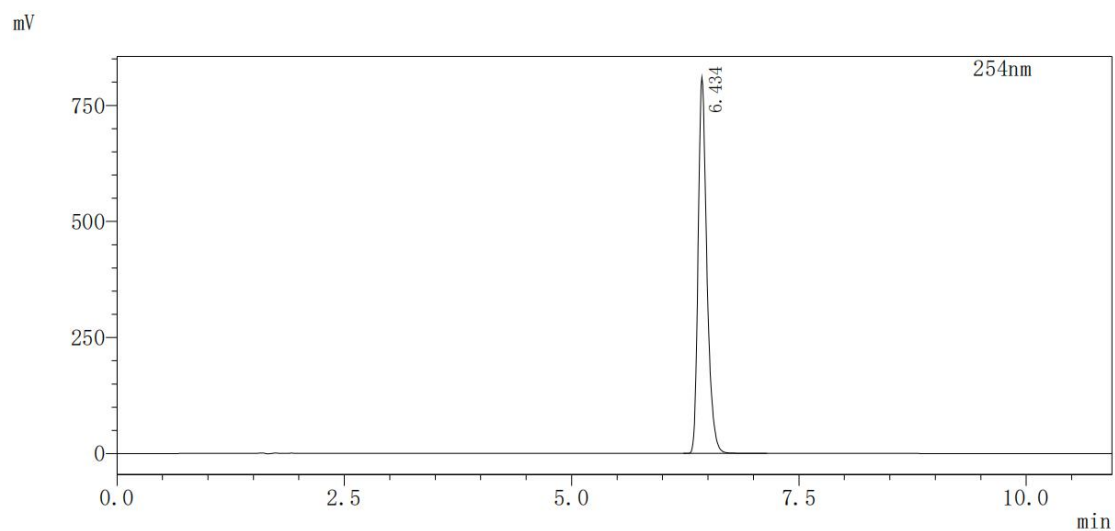

| Peak  | Retention time | Area    | Height | Concentration | Height% |
|-------|----------------|---------|--------|---------------|---------|
| 1     | 6.434          | 5426904 | 809601 | 100.000       |         |
| Total |                | 5426904 | 809601 |               |         |

#### 42e

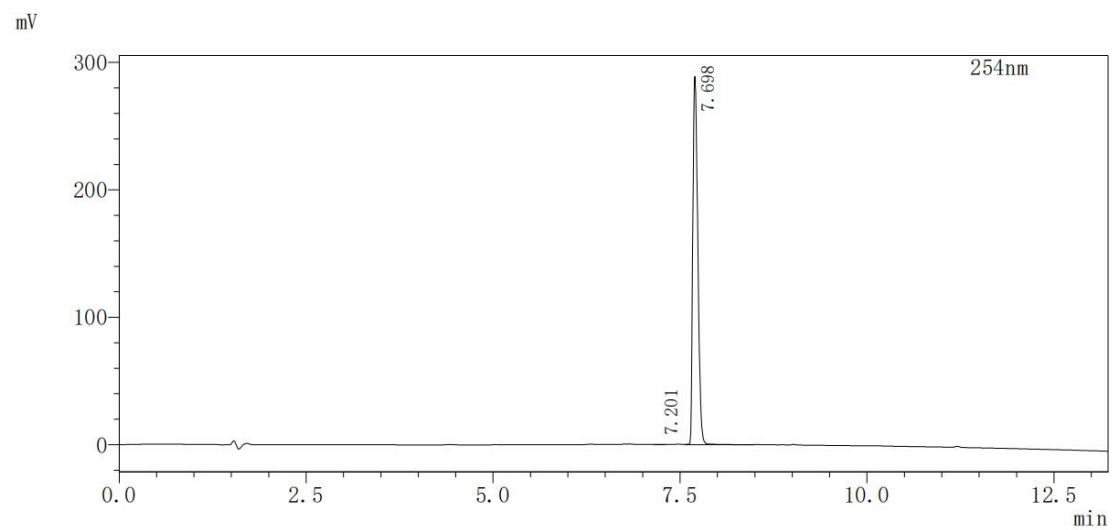

| Peak  | Retention time | Area    | Height | Area%   | Height% |
|-------|----------------|---------|--------|---------|---------|
| 1     | 7.201          | 1180    | 158    | 0.088   | 0.055   |
| 2     | 7.698          | 1347150 | 288999 | 99.912  | 99.945  |
| Total |                | 1348330 | 289156 | 100.000 | 100.000 |

#### 42f

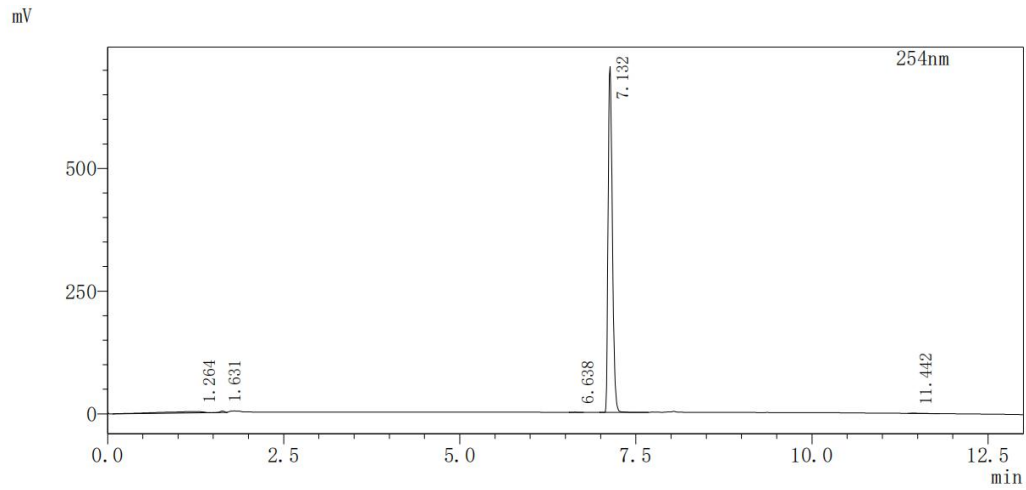

| Peak  | Retention time | Area    | Height | Area%   | Height% |
|-------|----------------|---------|--------|---------|---------|
| 1     | 1.264          | 122566  | 2537   | 3.955   | 0.357   |
| 2     | 1.631          | 13764   | 3046   | 0.444   | 0.428   |
| 3     | 6.638          | 1547    | 327    | 0.050   | 0.046   |
| 4     | 7.132          | 2958563 | 704846 | 95.457  | 99.086  |
| 5     | 11.442         | 2921    | 591    | 0.094   | 0.083   |
| Total |                | 3099361 | 711346 | 100.000 | 100.000 |

#### 42g

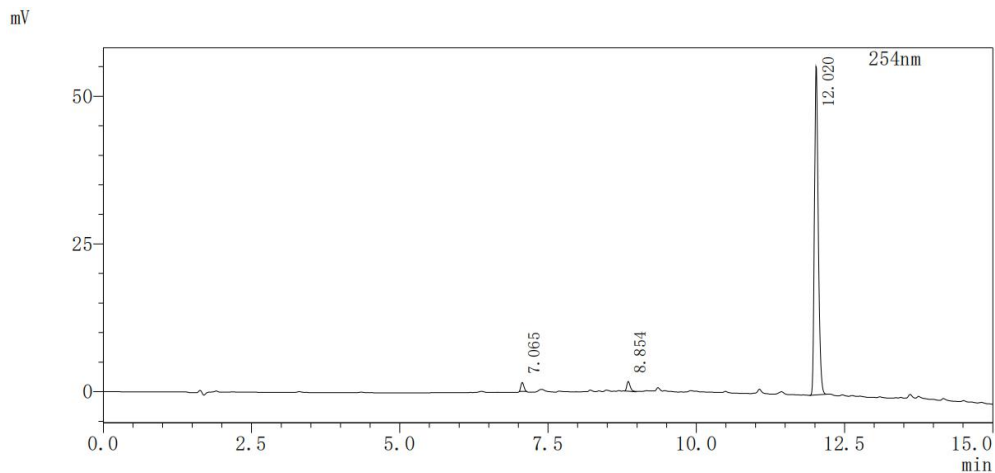

| Peak  | Retention time | Area   | Height | Concentration | Height% |
|-------|----------------|--------|--------|---------------|---------|
| 1     | 7.065          | 5252   | 1501   | 2.074         | 2.558   |
| 2     | 8.854          | 6993   | 1664   | 2.761         | 2.834   |
| 3     | 12.020         | 241010 | 55532  | 95.165        | 94.608  |
| Total |                | 253255 | 58697  |               | 100.000 |

#### 42h

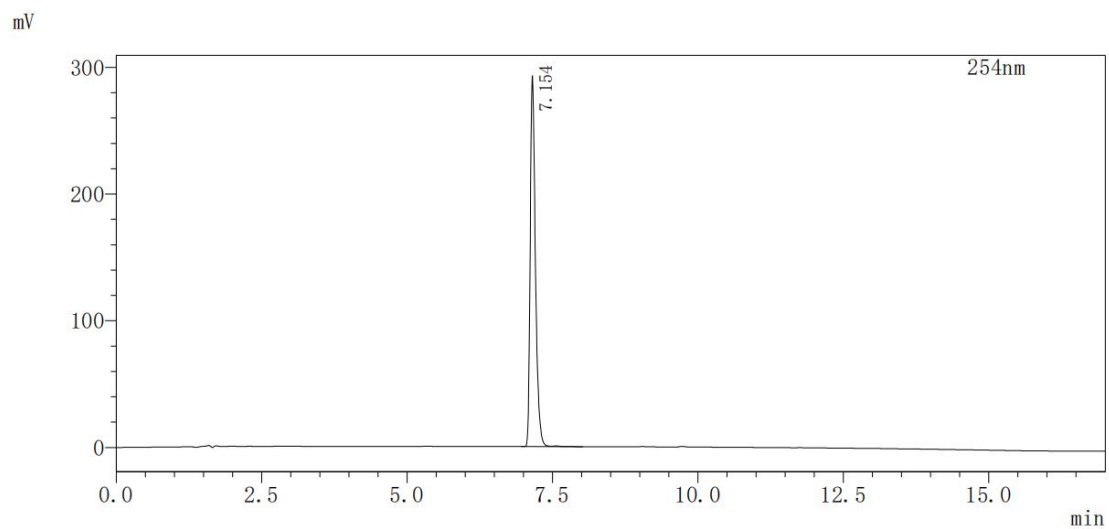

| Peak  | Retention time | Area    | Height | Concentration | Height% |
|-------|----------------|---------|--------|---------------|---------|
| 1     | 7.154          | 1818715 | 292284 | 100.000       | 100.000 |
| Total |                | 1818715 | 292284 |               | 100.000 |

#### 42i

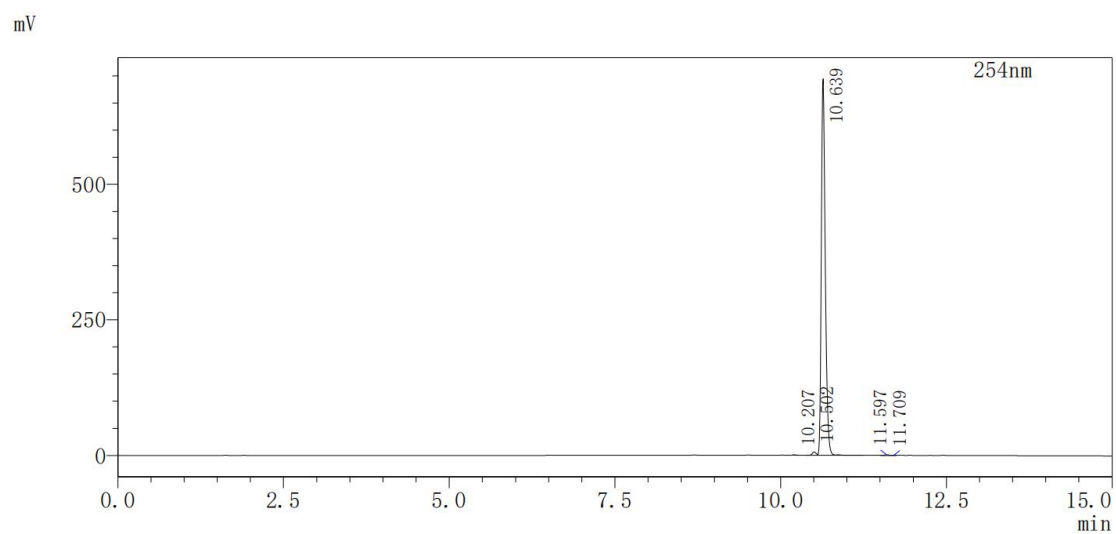

| Peak  | Retention time | Area    | Height | Concentration | Height% |
|-------|----------------|---------|--------|---------------|---------|
| 1     | 10.207         | 919     | 411    | 0.031         | 0.058   |
| 2     | 10.502         | 25287   | 6412   | 0.866         | 0.912   |
| 3     | 10.639         | 2889312 | 694478 | 98.896        | 98.826  |
| 4     | 11.597         | 5013    | 1140   | 0.172         | 0.162   |
| 5     | 11.709         | 1027    | 287    | 0.035         | 0.041   |
| Total |                | 2921560 | 702728 |               | 100.000 |

### 42j

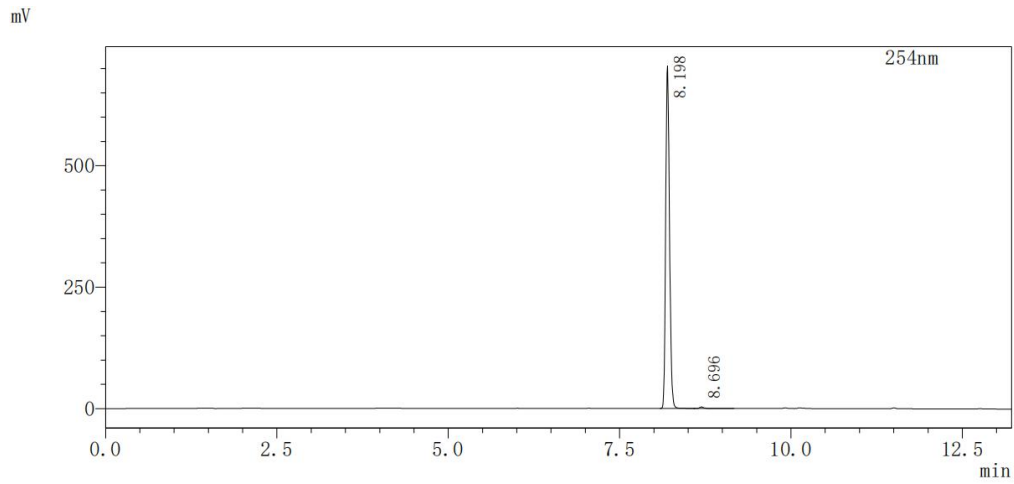

| Peak  | Retention time | Area    | Height | Concentration | Height% |
|-------|----------------|---------|--------|---------------|---------|
| 1     | 8.198          | 2725956 | 704990 | 99.525        | 99.567  |
| 2     | 8.696          | 13011   | 3068   | 0.475         | 0.433   |
| Total |                | 2738968 | 708058 |               | 100.000 |

### 43a

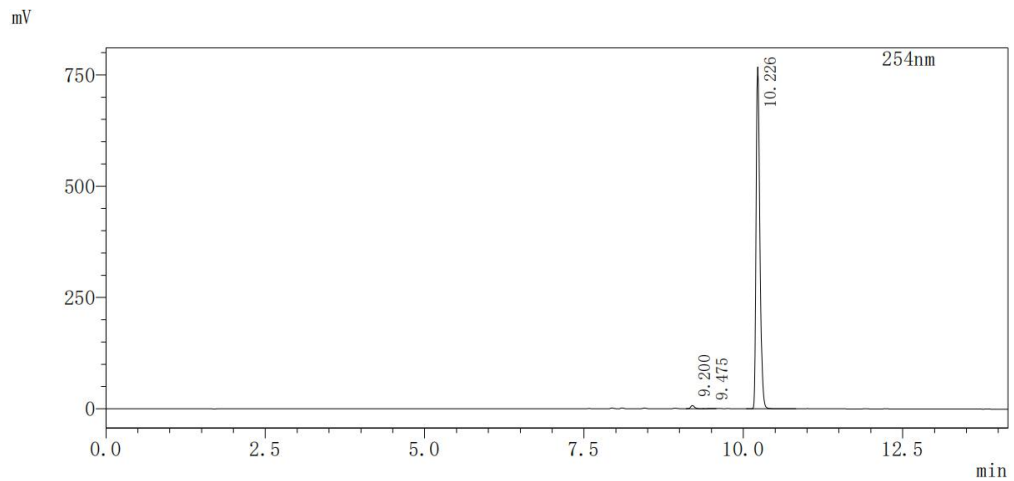



| Peak  | Retention time | Area    | Height | Concentration | Height% |
|-------|----------------|---------|--------|---------------|---------|
| 1     | 9.200          | 33934   | 7197   | 1.067         | 0.928   |
| 2     | 9.475          | 6486    | 829    | 0.204         | 0.107   |
| 3     | 10.226         | 3139682 | 767917 | 98.729        | 98.966  |
| Total |                | 3180103 | 775943 |               | 100.000 |

### 43b

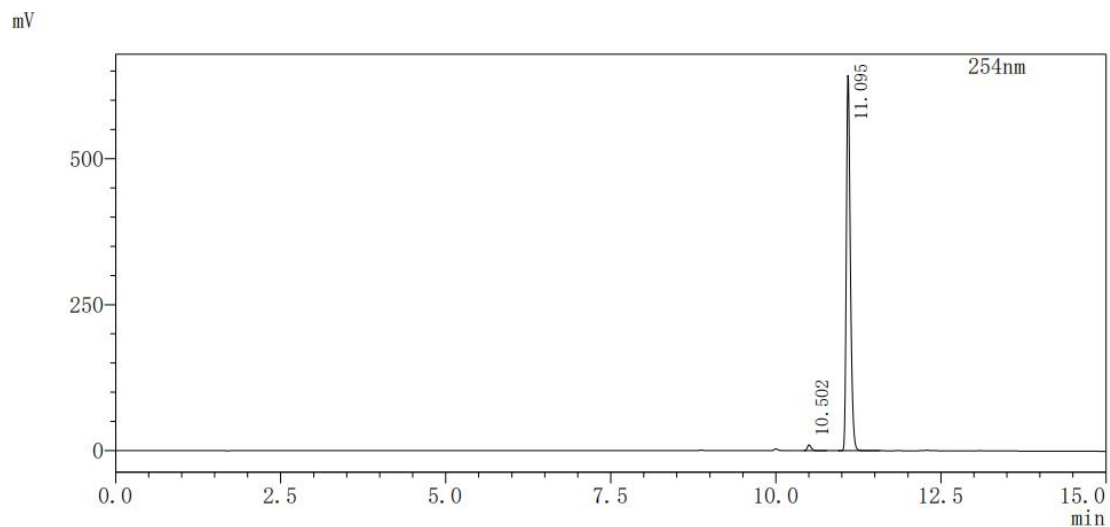

| Peak  | Retention time | Area    | Height | Concentration | Height% |
|-------|----------------|---------|--------|---------------|---------|
| 1     | 10.502         | 40433   | 9789   | 1.465         | 1.499   |
| 2     | 11.095         | 2718628 | 643044 | 98.535        | 98.501  |
| Total |                | 2759061 | 652833 |               | 100.000 |

### 43c

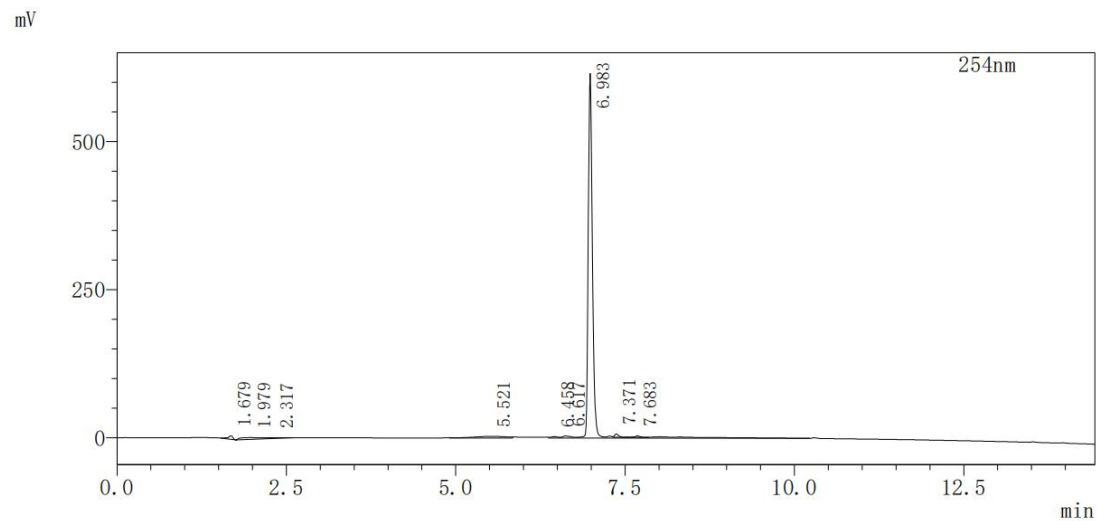

| Peak  | Retention time | Area    | Height | Concentration | Height% |
|-------|----------------|---------|--------|---------------|---------|
| 1     | 1.679          | 27319   | 5524   | 0.876         | 0.859   |
| 2     | 1.979          | 72311   | 3314   | 2.319         | 0.516   |
| 3     | 2.317          | 12677   | 1167   | 0.406         | 0.182   |
| 4     | 5.521          | 94156   | 2850   | 3.019         | 0.443   |
| 5     | 6.458          | 20336   | 2620   | 0.652         | 0.408   |
| 6     | 6.617          | 37421   | 3825   | 1.2           | 0.595   |
| 7     | 6.983          | 2819817 | 615929 | 90.417        | 95.833  |
| 8     | 7.371          | 20896   | 5172   | 0.67          | 0.805   |
| 9     | 7.683          | 13732   | 2308   | 0.44          | 0.359   |
| Total |                | 3118664 | 642708 |               | 100     |

### 43d

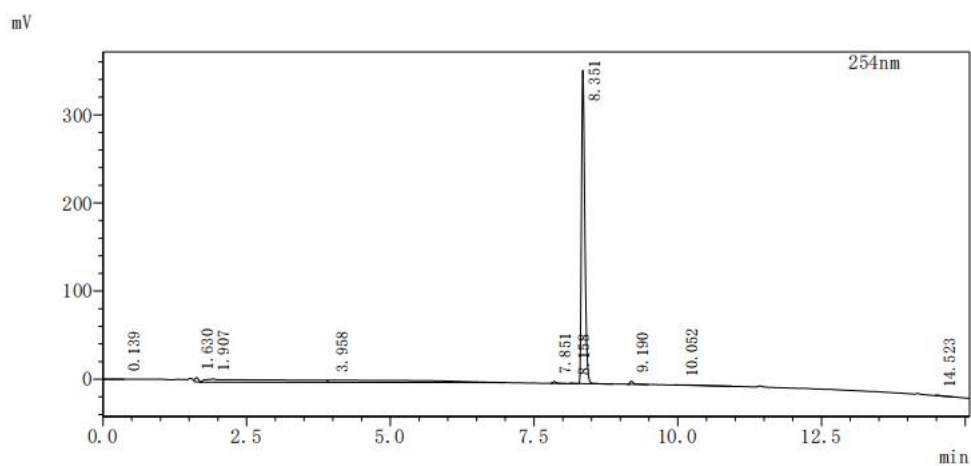

| Peak  | Retention time | Area    | Height | Area%   | Height% |
|-------|----------------|---------|--------|---------|---------|
| 1     | 0.139          | 2129    | 139    | 0.099   | 0.037   |
| 2     | 1.630          | 19431   | 4665   | 0.905   | 1.248   |
| 3     | 1.907          | 347990  | 3744   | 16.213  | 1.002   |
| 4     | 3.958          | 315752  | 2392   | 14.711  | 0.640   |
| 5     | 7.851          | 7847    | 2109   | 0.366   | 0.564   |
| 6     | 8.158          | 1824    | 510    | 0.085   | 0.136   |
| 7     | 8.351          | 1422967 | 355652 | 66.298  | 95.173  |
| 8     | 9.190          | 14987   | 3402   | 0.698   | 0.910   |
| 9     | 10.052         | 10393   | 264    | 0.484   | 0.071   |
| 10    | 14.523         | 2998    | 812    | 0.140   | 0.217   |
| Total |                | 2146317 | 373688 | 100.000 | 100.000 |

### 43e

mV

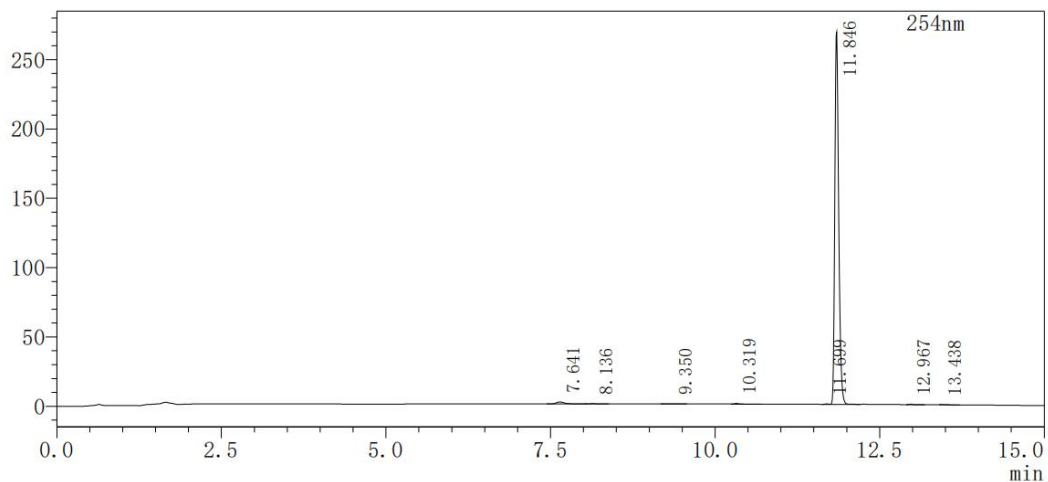

| Peak  | Retention time | Area    | Height | Concentration | Height% |
|-------|----------------|---------|--------|---------------|---------|
| 1     | 7.641          | 12534   | 1448   | 1.117         | 0.533   |
| 2     | 8.136          | 1314    | 219    | 0.117         | 0.081   |
| 3     | 9.35           | 1405    | 66     | 0.125         | 0.024   |
| 4     | 10.319         | 2293    | 435    | 0.204         | 0.16    |
| 5     | 11.699         | 1135    | 312    | 0.101         | 0.115   |
| 6     | 11.846         | 1101078 | 268491 | 98.119        | 98.883  |
| 7     | 12.967         | 1294    | 336    | 0.115         | 0.124   |
| 8     | 13.438         | 1139    | 219    | 0.101         | 0.08    |
| Total |                | 1122192 | 271526 |               | 100     |

### 43f

mV

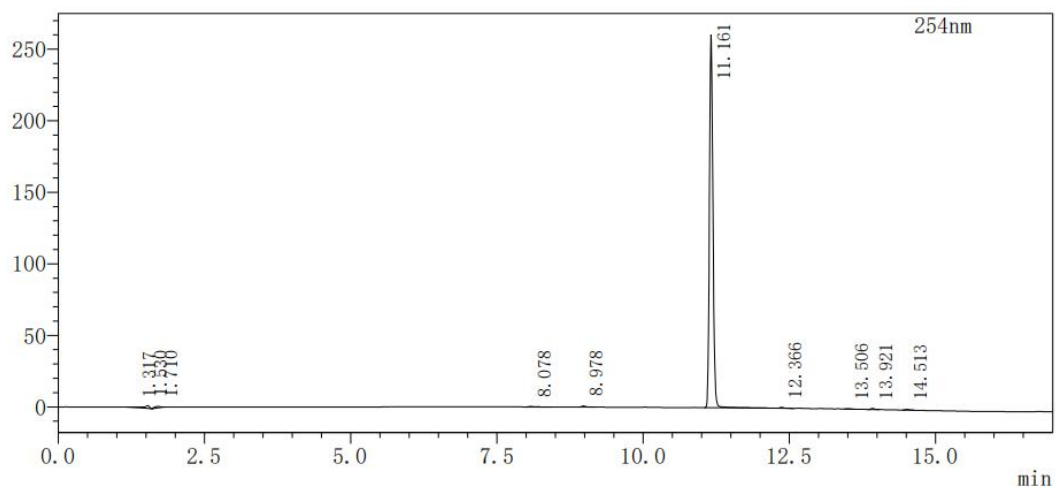

| Peak  | Retention time | Area    | Height | Concentration | Height% |
|-------|----------------|---------|--------|---------------|---------|
| 1     | 1.317          | 5782    | 415    | 0.000         | 0.155   |
| 2     | 1.530          | 10019   | 1945   | 0.000         | 0.727   |
| 3     | 1.710          | 7057    | 950    | 0.000         | 0.355   |
| 4     | 8.078          | 2145    | 393    | 0.000         | 0.147   |
| 5     | 8.978          | 3732    | 721    | 0.000         | 0.269   |
| 6     | 11.161         | 1090799 | 260792 | 0.000         | 97.533  |
| 7     | 12.366         | 2685    | 686    | 0.000         | 0.257   |
| 8     | 13.506         | 1103    | 219    | 0.000         | 0.082   |
| 9     | 13.921         | 2877    | 752    | 0.000         | 0.281   |
| 10    | 14.513         | 2042    | 515    | 0.000         | 0.192   |
| Total |                | 1128241 | 267388 |               | 100.000 |

**43g**

mV

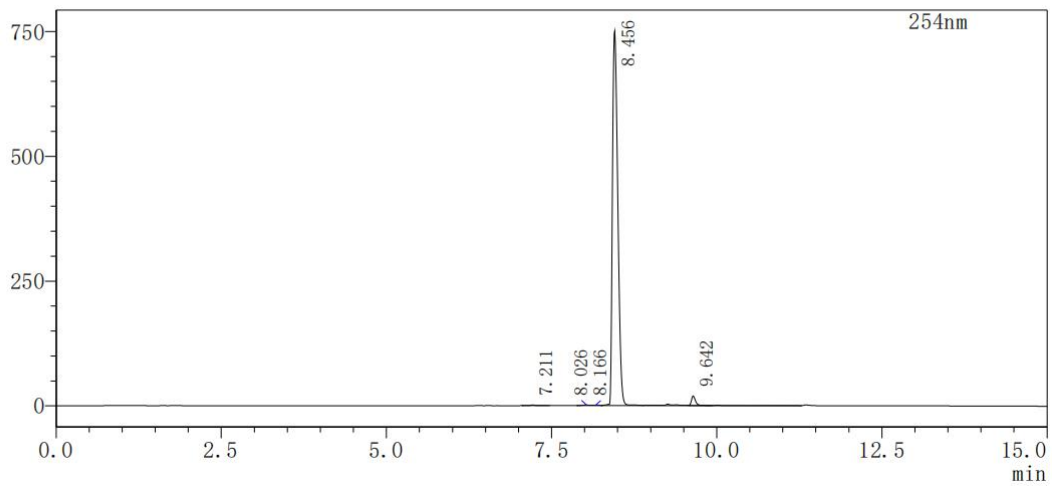

| Peak  | Retention time | Area    | Height | Concentration | Height% |
|-------|----------------|---------|--------|---------------|---------|
| 1     | 7.211          | 6791    | 1310   | 0.154         | 0.169   |
| 2     | 8.026          | 10244   | 1397   | 0.232         | 0.181   |
| 3     | 8.166          | 8073    | 1040   | 0.183         | 0.134   |
| 4     | 8.456          | 4312323 | 750334 | 97.593        | 97.034  |
| 5     | 9.642          | 81258   | 19187  | 1.839         | 2.481   |
| Total |                | 4418689 | 773268 |               | 100.000 |

### 43h

mV

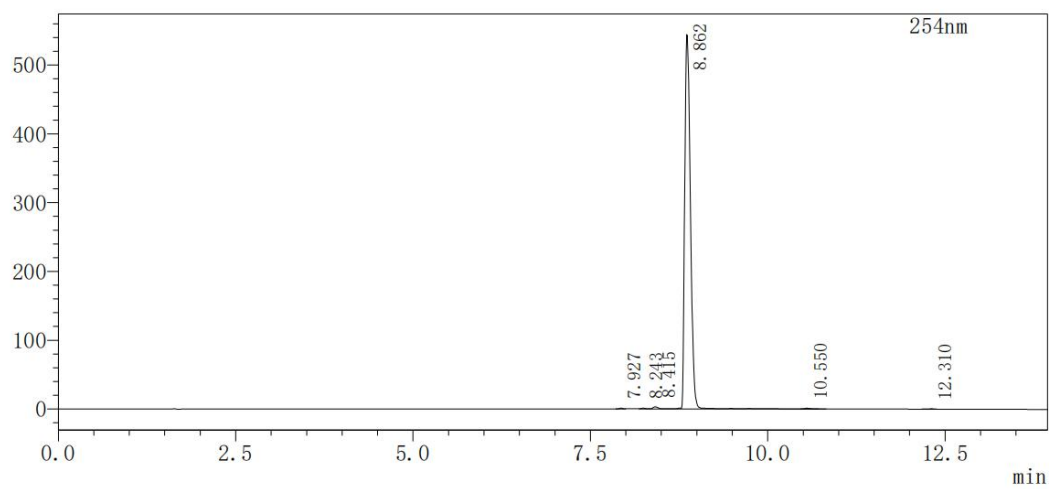

| Peak  | Retention time | Area    | Height | Concentration | Height% |
|-------|----------------|---------|--------|---------------|---------|
| 1     | 7.927          | 4665    | 1159   | 0.151         | 0.210   |
| 2     | 8.243          | 5417    | 1131   | 0.176         | 0.205   |
| 3     | 8.415          | 16425   | 3027   | 0.532         | 0.550   |
| 4     | 8.862          | 3050487 | 543752 | 98.887        | 98.740  |
| 5     | 10.550         | 4465    | 1050   | 0.145         | 0.191   |
| 6     | 12.310         | 3370    | 574    | 0.109         | 0.104   |
| Total |                | 3084829 | 550693 |               | 100.000 |

### 43i

mV

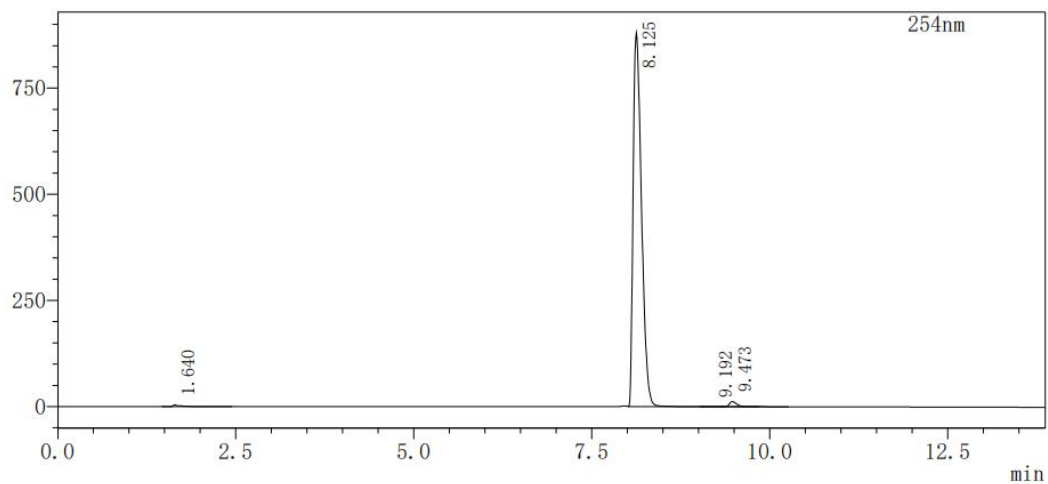

| Peak  | Retention time | Area    | Height | Concentration | Height% |
|-------|----------------|---------|--------|---------------|---------|
| 1     | 1.640          | 26450   | 3876   | 0.362         | 0.432   |
| 2     | 8.125          | 7201230 | 880100 | 98.470        | 98.190  |
| 3     | 9.192          | 1768    | 250    | 0.024         | 0.028   |
| 4     | 9.473          | 83671   | 12099  | 1.144         | 1.350   |
| Total |                | 7313120 | 896326 |               | 100.000 |

43j

mV

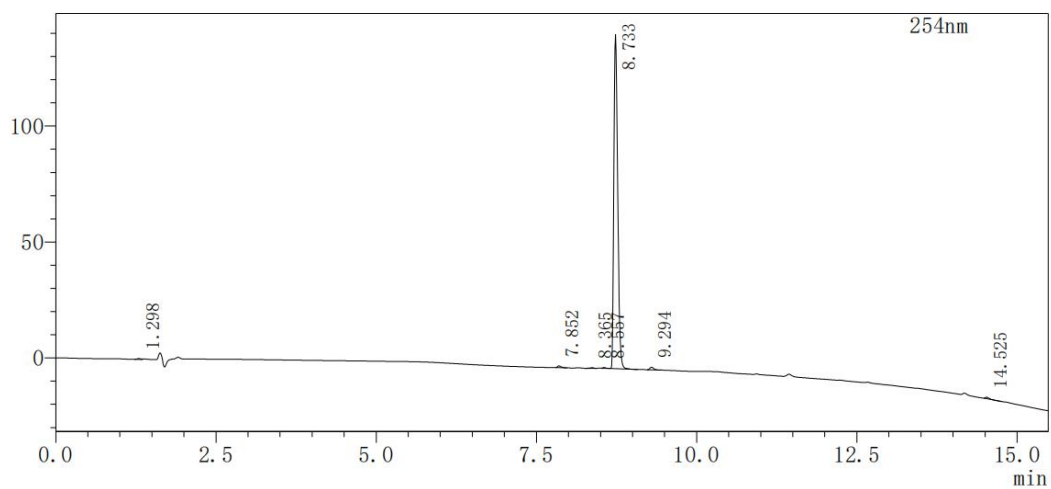

| Peak  | Retention time | Area   | Height | Area%   | Height% |
|-------|----------------|--------|--------|---------|---------|
| 1     | 1.298          | 1537   | 357    | 0.252   | 0.241   |
| 2     | 7.852          | 3256   | 841    | 0.535   | 0.569   |
| 3     | 8.365          | 1213   | 297    | 0.199   | 0.201   |
| 4     | 8.557          | 1408   | 383    | 0.231   | 0.259   |
| 5     | 8.733          | 594838 | 144130 | 97.660  | 97.512  |
| 6     | 9.294          | 4538   | 1141   | 0.745   | 0.772   |
| 7     | 14.525         | 2301   | 658    | 0.378   | 0.445   |
| Total |                | 609092 | 147807 | 100.000 | 100.000 |

### 43k

mV

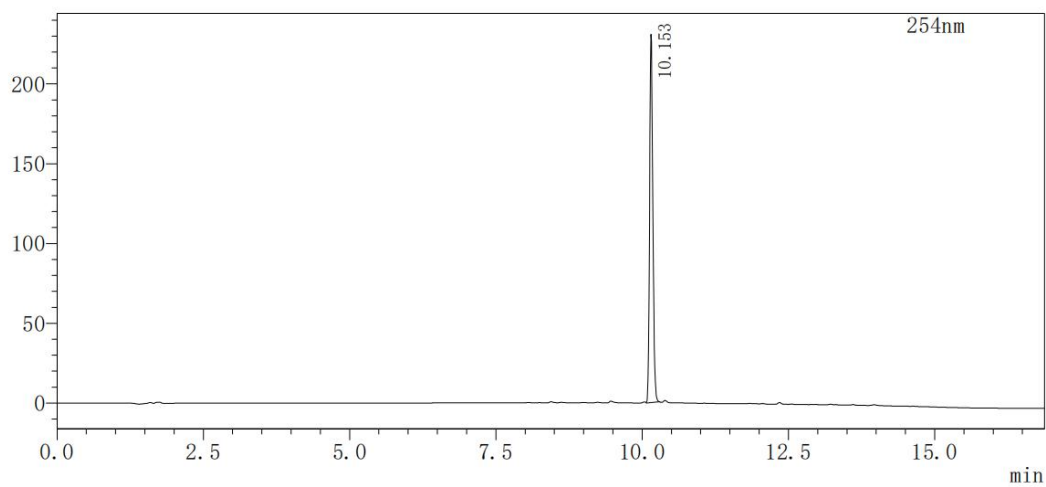

| Peak  | Retention time | Area   | Height | Area%   | Height% |
|-------|----------------|--------|--------|---------|---------|
| 1     | 10.153         | 885534 | 230782 | 100.000 | 100.000 |
| Total |                | 885534 | 230782 | 100.000 | 100.000 |

### 43l

mV

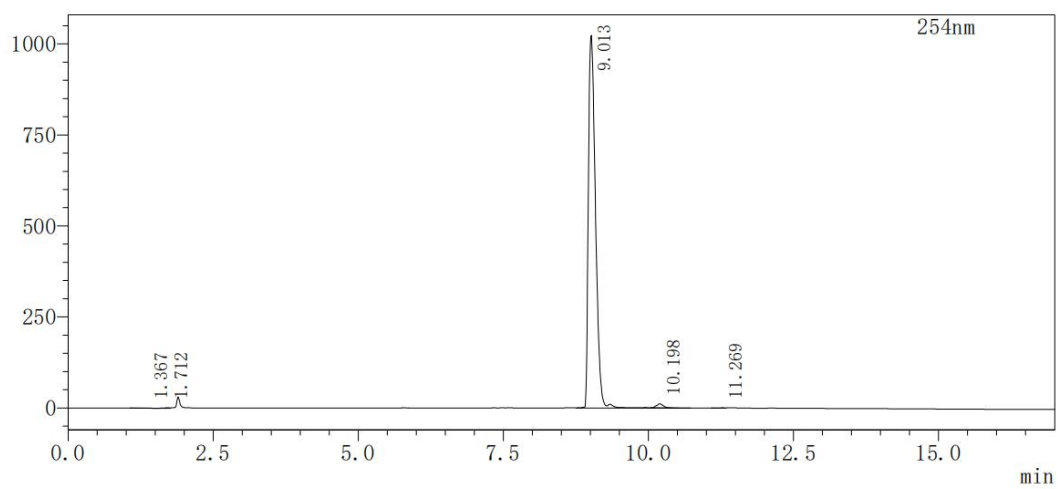

| Peak  | Retention time | Area    | Height  | Area%   | Height% |
|-------|----------------|---------|---------|---------|---------|
| 1     | 1.367          | 8582    | 666     | 0.098   | 0.064   |
| 2     | 1.712          | 10975   | 1466    | 0.125   | 0.141   |
| 3     | 9.013          | 8685523 | 1022423 | 98.692  | 98.667  |
| 4     | 10.198         | 90802   | 11071   | 1.032   | 1.068   |
| 5     | 11.269         | 4761    | 605     | 0.054   | 0.058   |
| Total |                | 8800643 | 1036231 | 100.000 | 100.000 |

### 43m

mV

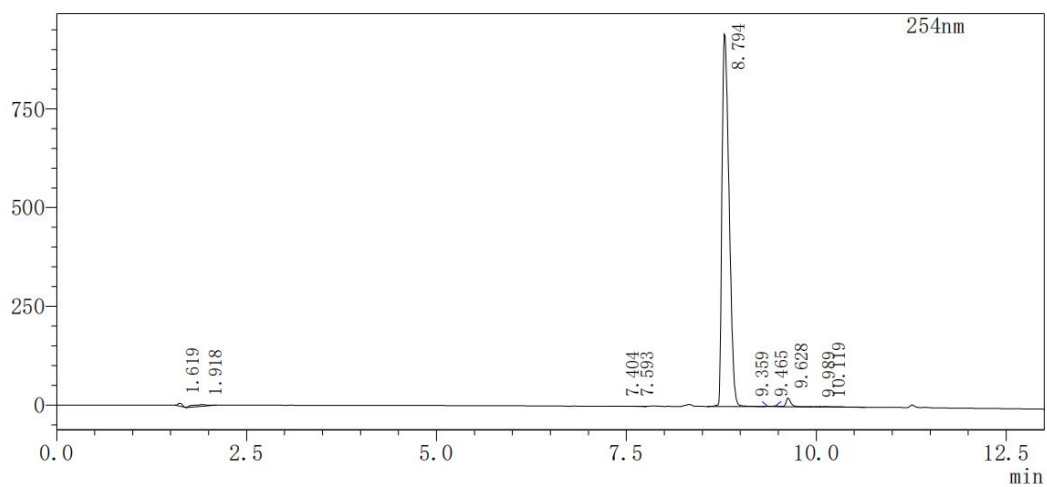

| Peak  | Retention time | Area    | Height | Area%   | Height% |
|-------|----------------|---------|--------|---------|---------|
| 1     | 1.619          | 29555   | 7334   | 0.465   | 0.748   |
| 2     | 1.918          | 63620   | 4327   | 1.000   | 0.442   |
| 3     | 7.404          | 1148    | 308    | 0.018   | 0.031   |
| 4     | 7.593          | 1232    | 286    | 0.019   | 0.029   |
| 5     | 8.794          | 6139670 | 941719 | 96.550  | 96.094  |
| 6     | 9.359          | 4260    | 1164   | 0.067   | 0.119   |
| 7     | 9.465          | 11023   | 1802   | 0.173   | 0.184   |
| 8     | 9.628          | 93761   | 21898  | 1.474   | 2.234   |
| 9     | 9.989          | 1523    | 267    | 0.024   | 0.027   |
| 10    | 10.119         | 13241   | 893    | 0.208   | 0.091   |
| Total |                | 6359032 | 979997 | 100.000 | 100.000 |

### 43n

mV

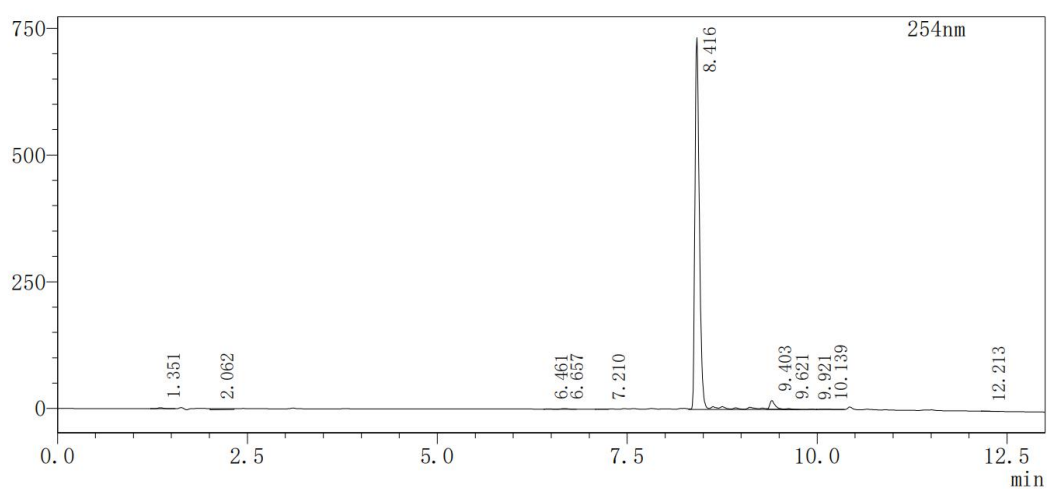



| Peak  | Retention time | Area    | Height | Area%   | Height% |
|-------|----------------|---------|--------|---------|---------|
| 1     | 1.351          | 10084   | 2011   | 0.311   | 0.265   |
| 2     | 2.062          | 30782   | 1917   | 0.949   | 0.253   |
| 3     | 6.461          | 1694    | 413    | 0.052   | 0.054   |
| 4     | 6.657          | 6380    | 995    | 0.197   | 0.131   |
| 5     | 7.210          | 2042    | 290    | 0.063   | 0.038   |
| 6     | 8.416          | 3088261 | 733080 | 95.171  | 96.552  |
| 7     | 9.403          | 84999   | 17202  | 2.619   | 2.266   |
| 8     | 9.621          | 7517    | 1587   | 0.232   | 0.209   |
| 9     | 9.921          | 3220    | 477    | 0.099   | 0.063   |
| 10    | 10.139         | 8425    | 946    | 0.260   | 0.125   |
| 11    | 12.213         | 1553    | 339    | 0.048   | 0.045   |
| Total |                | 3244957 | 759258 | 100.000 | 100.000 |

### 43o

mV

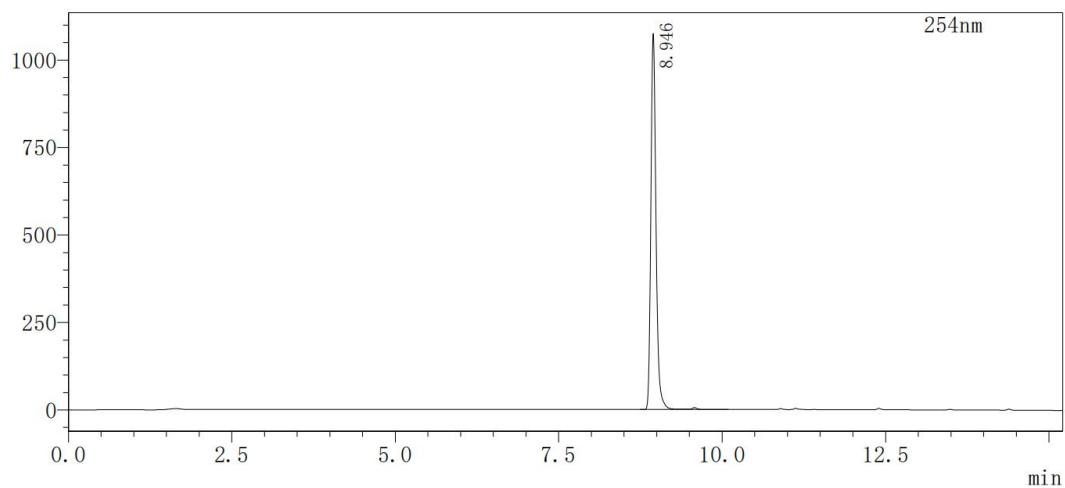

| Peak  | Retention time | Area    | Height  | Concentration | Height% |
|-------|----------------|---------|---------|---------------|---------|
| 1     | 8.946          | 5827062 | 1073645 | 100.000       | 100.000 |
| Total |                | 5827062 | 1073645 |               | 100.000 |

### 43p

mV

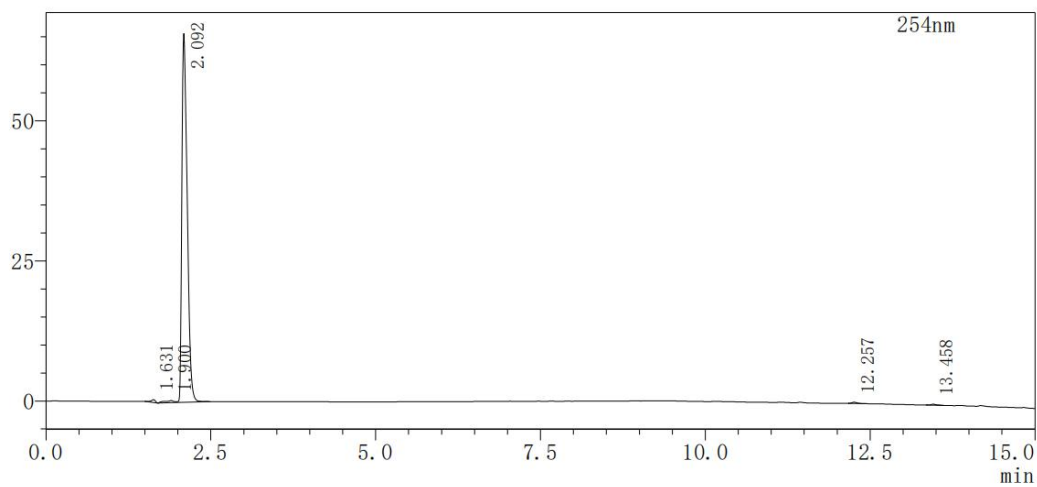

| Peak  | Retention time | Area   | Height | Area%   | Height% |
|-------|----------------|--------|--------|---------|---------|
| 1     | 1.631          | 2340   | 516    | 0.613   | 0.769   |
| 2     | 1.900          | 4017   | 370    | 1.053   | 0.551   |
| 3     | 2.092          | 372928 | 65797  | 97.744  | 98.063  |
| 4     | 12.257         | 1200   | 220    | 0.315   | 0.328   |
| 5     | 13.458         | 1051   | 194    | 0.275   | 0.289   |
| Total |                | 381536 | 67097  | 100.000 | 100.000 |

### 43q

mV

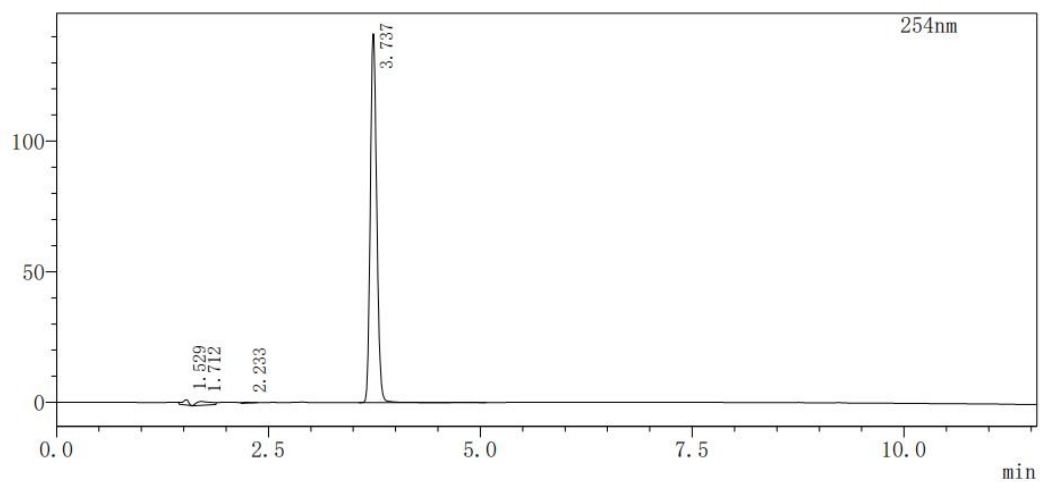

| Peak  | Retention time | Area   | Height | Area%   | Height% |
|-------|----------------|--------|--------|---------|---------|
| 1     | 1.529          | 9962   | 2044   | 1.294   | 1.411   |
| 2     | 1.712          | 17574  | 1493   | 2.283   | 1.031   |
| 3     | 2.233          | 1830   | 241    | 0.238   | 0.167   |
| 4     | 3.737          | 740333 | 141036 | 96.185  | 97.391  |
| Total |                | 769699 | 144814 | 100.000 | 100.000 |

**44a**

mV

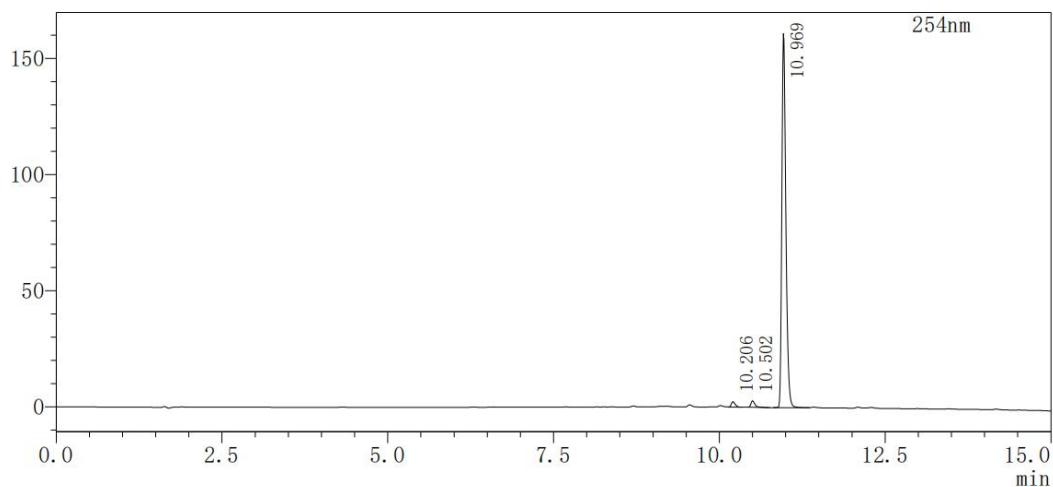

| Peak  | Retention time | Area   | Height | Concentration | Height% |
|-------|----------------|--------|--------|---------------|---------|
| 1     | 10.206         | 9789   | 2366   | 1.398         | 1.424   |
| 2     | 10.502         | 11633  | 2752   | 1.662         | 1.657   |
| 3     | 10.969         | 678698 | 161002 | 96.940        | 96.919  |
| Total |                | 700120 | 166120 |               | 100.000 |

**44b**

mV

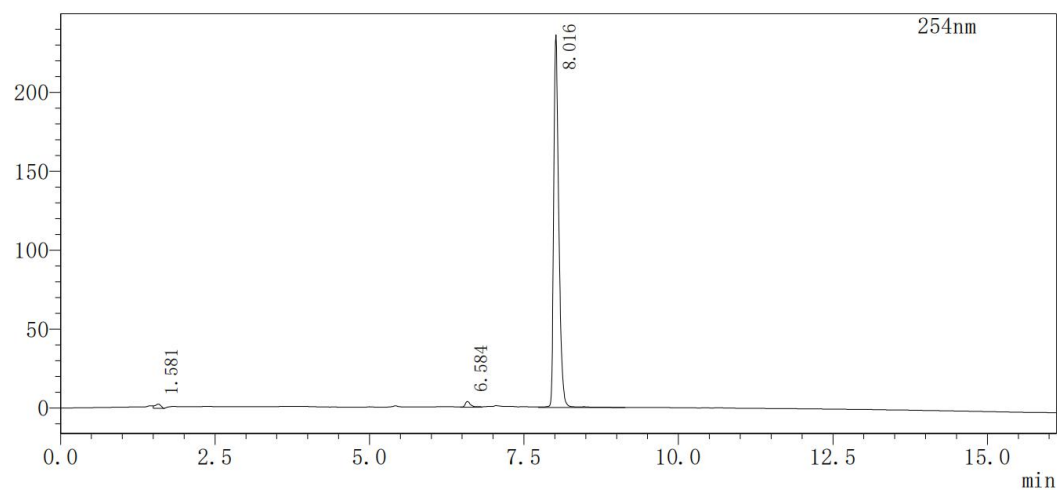

| Peak  | Retention time | Area    | Height | Concentration | Height% |
|-------|----------------|---------|--------|---------------|---------|
| 1     | 1.581          | 17233   | 2654   | 1.239         | 1.095   |
| 2     | 6.584          | 24592   | 3693   | 1.768         | 1.524   |
| 3     | 8.016          | 1349025 | 236018 | 96.993        | 97.381  |
| Total |                | 1390850 | 242366 |               | 100.000 |

### 44c

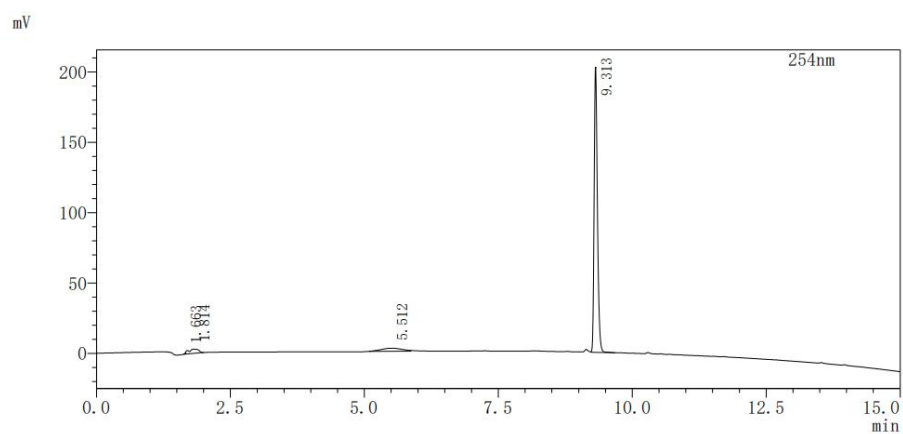

| Peak  | Retention time | Area   | Height | Concentration | Height% |
|-------|----------------|--------|--------|---------------|---------|
| 1     | 1.663          | 1755   | 970    | 0.183         | 0.464   |
| 2     | 1.814          | 37864  | 2982   | 3.952         | 1.427   |
| 3     | 5.512          | 59479  | 2167   | 6.209         | 1.037   |
| 4     | 9.313          | 858917 | 202908 | 89.656        | 97.072  |
| Total |                | 958014 | 209028 |               | 100.000 |

### 44d

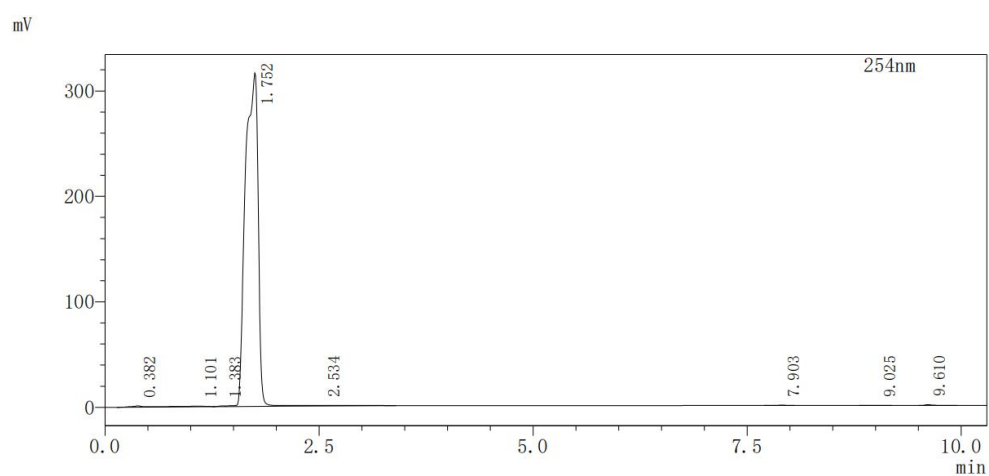

| Peak  | Retention time | Area    | Height | Concentration | Height% |
|-------|----------------|---------|--------|---------------|---------|
| 1     | 0.382          | 10539   | 1249   | 0.000         | 0.390   |
| 2     | 1.101          | 19249   | 537    | 0.000         | 0.168   |
| 3     | 1.383          | 4071    | 756    | 0.000         | 0.236   |
| 4     | 1.752          | 3236424 | 315948 | 0.000         | 98.628  |
| 5     | 2.534          | 31550   | 582    | 0.000         | 0.182   |
| 6     | 7.903          | 1795    | 319    | 0.000         | 0.100   |
| 7     | 9.025          | 1426    | 97     | 0.000         | 0.030   |
| 8     | 9.610          | 5395    | 856    | 0.000         | 0.267   |
| Total |                | 3310450 | 320344 |               | 100.000 |

44e

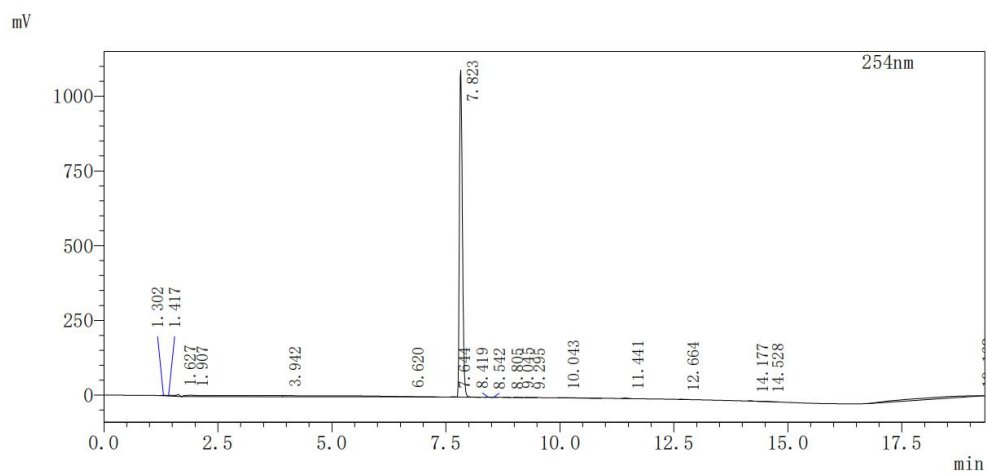

| Peak  | Retention time | Area    | Height  | Area%   | Height% |
|-------|----------------|---------|---------|---------|---------|
| 1     | 1.302          | 4911    | 997     | 0.074   | 0.089   |
| 2     | 1.417          | 26166   | 1761    | 0.394   | 0.157   |
| 3     | 1.627          | 28277   | 6212    | 0.426   | 0.553   |
| 4     | 1.907          | 470641  | 4705    | 7.083   | 0.419   |
| 5     | 3.942          | 457983  | 3427    | 6.892   | 0.305   |
| 6     | 6.620          | 25727   | 1586    | 0.387   | 0.141   |
| 7     | 7.644          | 2989    | 597     | 0.045   | 0.053   |
| 8     | 7.823          | 4975290 | 1093825 | 74.875  | 97.371  |
| 9     | 8.419          | 3982    | 1070    | 0.060   | 0.095   |
| 10    | 8.542          | 1056    | 324     | 0.016   | 0.029   |
| 11    | 8.805          | 2340    | 626     | 0.035   | 0.056   |
| 12    | 9.045          | 6327    | 1517    | 0.095   | 0.135   |
| 13    | 9.295          | 3798    | 748     | 0.057   | 0.067   |
| 14    | 10.043         | 9220    | 217     | 0.139   | 0.019   |
| 15    | 11.441         | 9425    | 1974    | 0.142   | 0.176   |
| 16    | 12.664         | 1494    | 379     | 0.022   | 0.034   |
| 17    | 14.177         | 4788    | 1152    | 0.072   | 0.103   |
| 18    | 14.528         | 3876    | 1010    | 0.058   | 0.090   |
| 19    | 19.168         | 606503  | 1231    | 9.127   | 0.110   |
| Total |                | 6644793 | 1123358 | 100.000 | 100.000 |

**44f**

mV

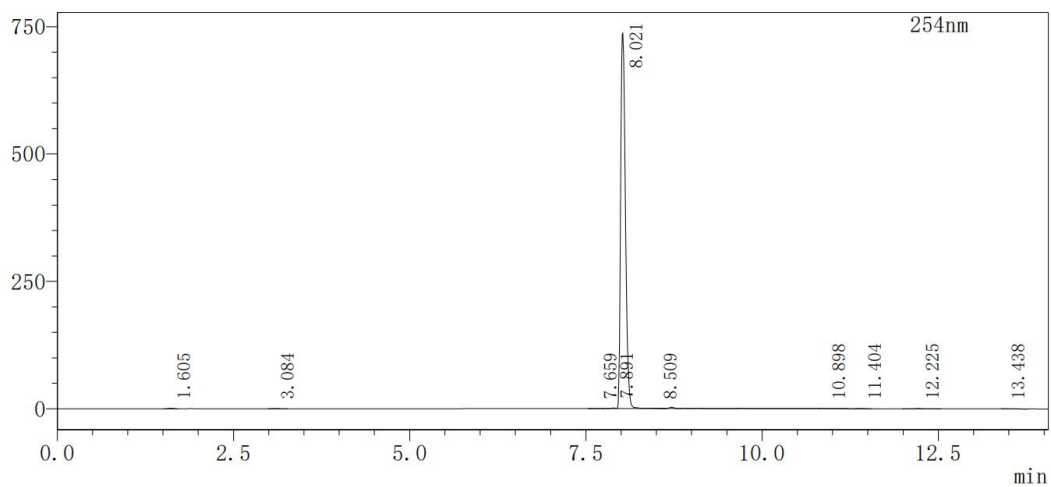

| Peak  | Retention time | Area    | Height | Area%   | Height% |
|-------|----------------|---------|--------|---------|---------|
| 1     | 1.605          | 4536    | 1089   | 0.127   | 0.147   |
| 2     | 3.084          | 1646    | 344    | 0.046   | 0.046   |
| 3     | 7.659          | 2382    | 296    | 0.067   | 0.040   |
| 4     | 7.891          | 6796    | 1201   | 0.191   | 0.162   |
| 5     | 8.021          | 3536226 | 736663 | 99.334  | 99.468  |
| 6     | 8.509          | 1407    | 293    | 0.040   | 0.040   |
| 7     | 10.898         | 1051    | 35     | 0.030   | 0.005   |
| 8     | 11.404         | 1235    | 170    | 0.035   | 0.023   |
| 9     | 12.225         | 2931    | 267    | 0.082   | 0.036   |
| 10    | 13.438         | 1736    | 248    | 0.049   | 0.033   |
| Total |                | 3559945 | 740606 | 100.000 | 100.000 |

**44g**

mV

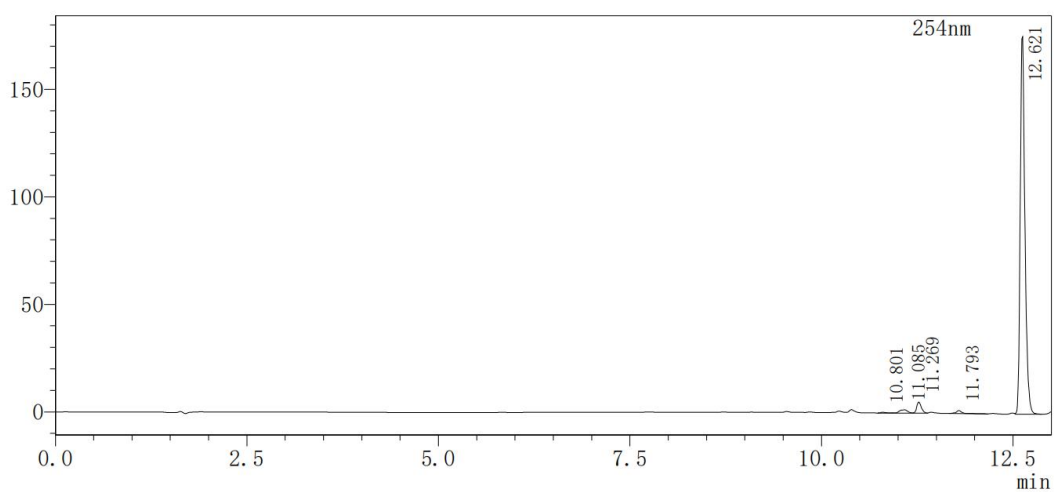

| Peak  | Retention time | Area   | Height | Concentration | Height% |
|-------|----------------|--------|--------|---------------|---------|
| 1     | 10.801         | 1694   | 355    | 0.213         | 0.193   |
| 2     | 11.085         | 10976  | 1541   | 1.380         | 0.838   |
| 3     | 11.269         | 21176  | 5143   | 2.662         | 2.797   |
| 4     | 11.793         | 8032   | 1415   | 1.010         | 0.769   |
| 5     | 12.621         | 753610 | 175448 | 94.735        | 95.403  |
| Total |                | 795489 | 183902 |               | 100.000 |

**44h**

mV

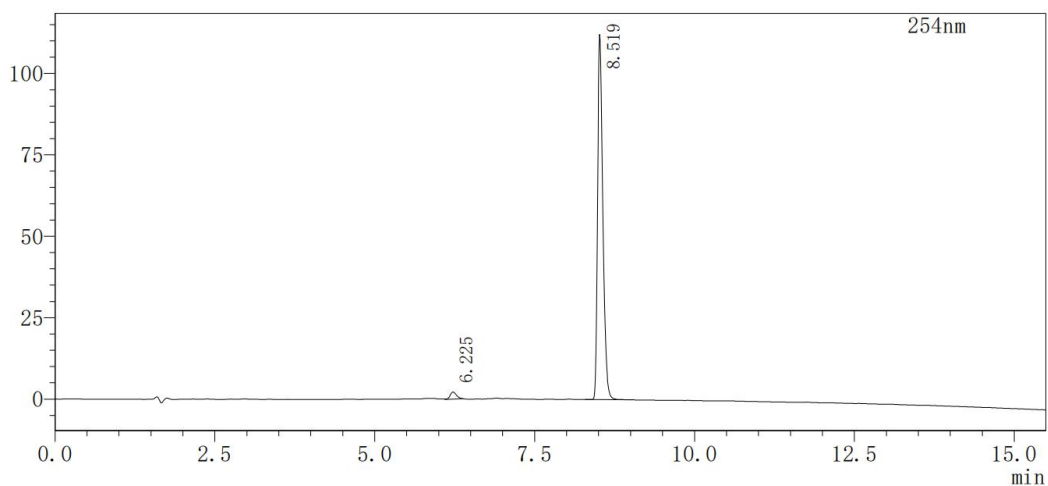

| Peak  | Retention time | Area   | Height | Area%   | Height% |
|-------|----------------|--------|--------|---------|---------|
| 1     | 6.225          | 14687  | 2147   | 2.228   | 1.878   |
| 2     | 8.519          | 644630 | 112187 | 97.772  | 98.122  |
| Total |                | 659317 | 114334 | 100.000 | 100.000 |

**44i**

mV

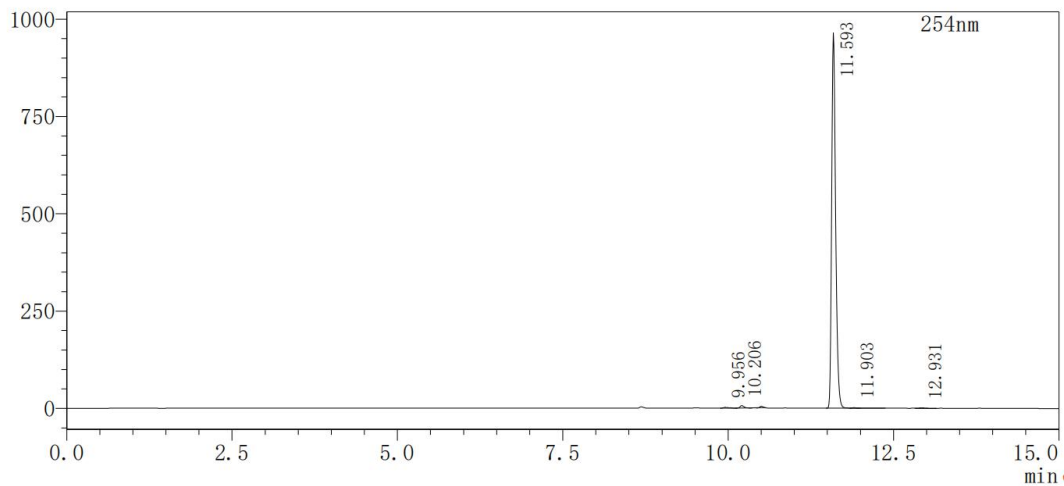

| Peak  | Retention time | Area    | Height | Concentration | Height% |
|-------|----------------|---------|--------|---------------|---------|
| 1     | 9.956          | 9963    | 1851   | 0.244         | 0.190   |
| 2     | 10.206         | 32827   | 6152   | 0.804         | 0.631   |
| 3     | 11.593         | 4028480 | 964276 | 98.679        | 98.947  |
| 4     | 11.903         | 3319    | 938    | 0.081         | 0.096   |
| 5     | 12.931         | 7819    | 1323   | 0.192         | 0.136   |
| Total |                | 4082408 | 974540 |               | 100.000 |

**44j**

mV

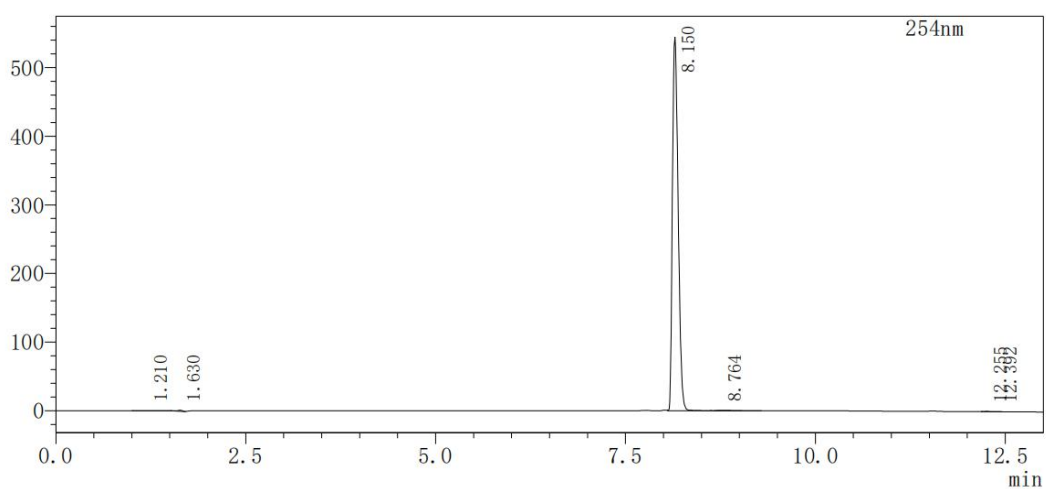

| Peak  | Retention time | Area    | Height | Concentration | Height% |
|-------|----------------|---------|--------|---------------|---------|
| 1     | 1.210          | 2166    | 121    | 0.075         | 0.022   |
| 2     | 1.630          | 6625    | 1398   | 0.229         | 0.256   |
| 3     | 8.150          | 2878132 | 544167 | 99.466        | 99.517  |
| 4     | 8.764          | 3083    | 467    | 0.107         | 0.085   |
| 5     | 12.255         | 2471    | 457    | 0.085         | 0.084   |
| 6     | 12.392         | 1106    | 196    | 0.038         | 0.036   |
| Total |                | 2893582 | 546806 |               | 100.000 |



### 44k

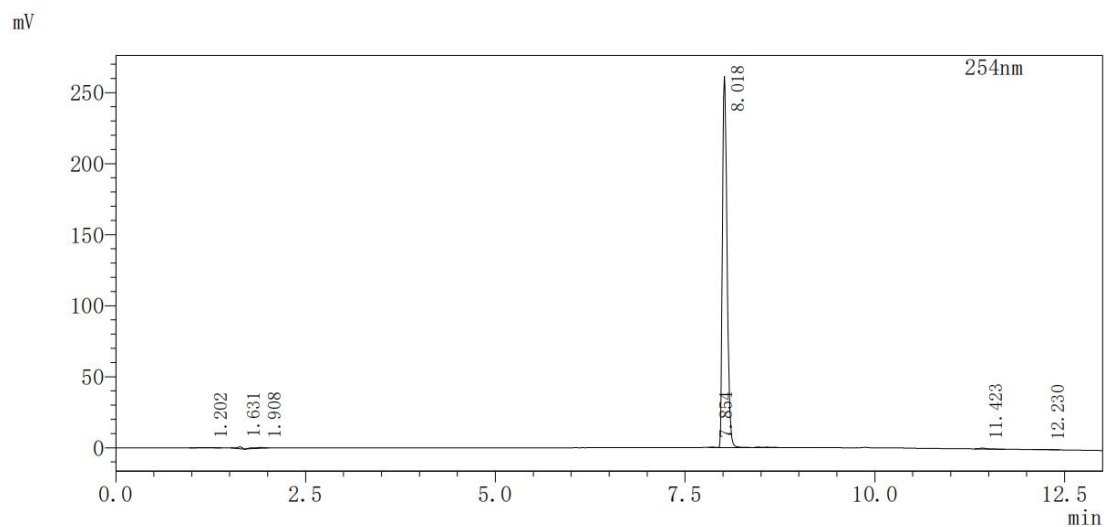

| Peak  | Retention time | Area    | Height | Concentration | Height% |
|-------|----------------|---------|--------|---------------|---------|
| 1     | 1.202          | 1831    | 110    | 0.160         | 0.042   |
| 2     | 1.631          | 5775    | 1263   | 0.506         | 0.477   |
| 3     | 1.908          | 7276    | 560    | 0.637         | 0.212   |
| 4     | 7.854          | 2178    | 428    | 0.191         | 0.162   |
| 5     | 8.018          | 1120006 | 261387 | 98.052        | 98.816  |
| 6     | 11.423         | 3747    | 589    | 0.328         | 0.223   |
| 7     | 12.230         | 1438    | 183    | 0.126         | 0.069   |
| Total |                | 1142252 | 264520 |               | 100.000 |

### 44l

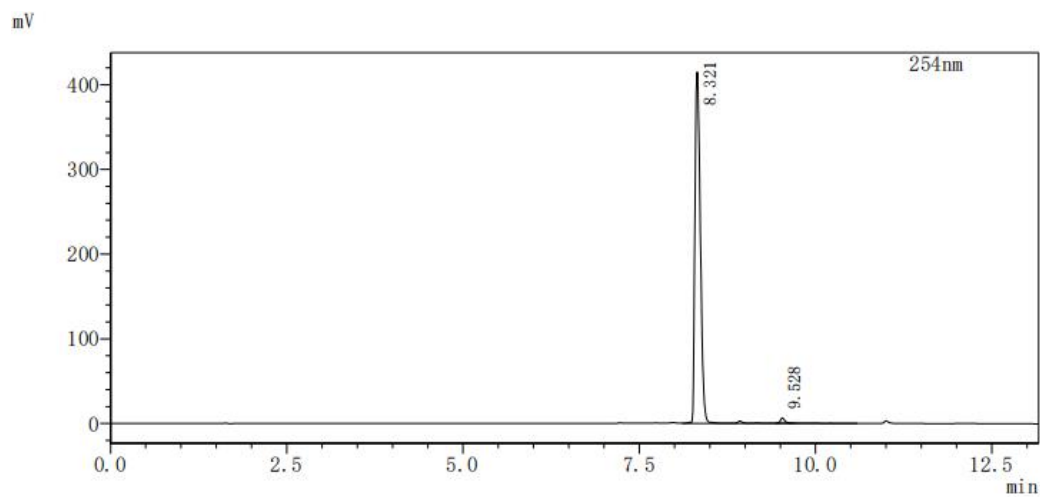

| Peak  | Retention time | Area    | Height | Concentration | Height% |
|-------|----------------|---------|--------|---------------|---------|
| 1     | 8.321          | 2242783 | 414489 | 98.838        | 98.536  |
| 2     | 9.528          | 26361   | 6158   | 1.162         | 1.464   |
| Total |                | 2269145 | 420647 |               | 100.000 |

#### 44m

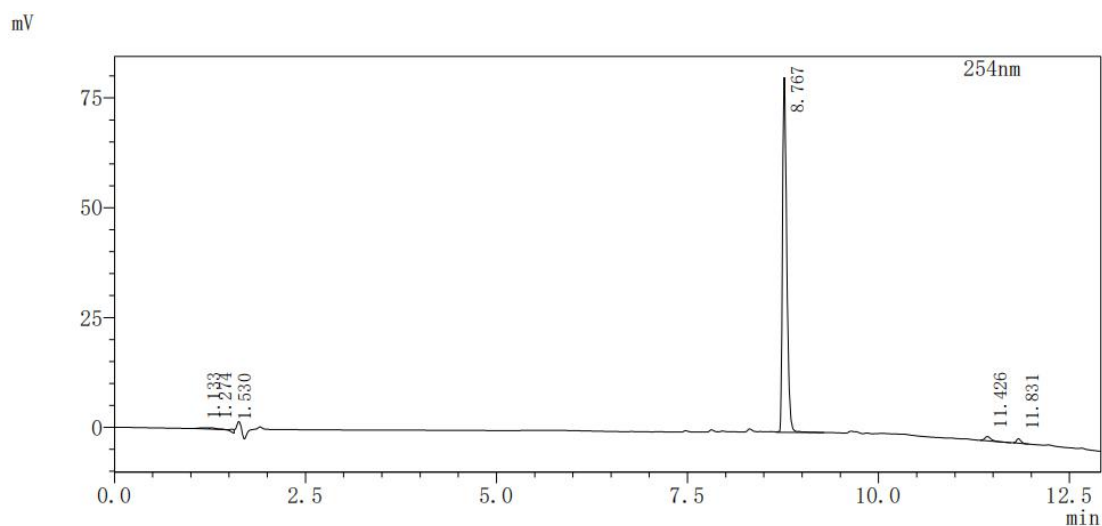

| Peak  | Retention time | Area   | Height | Area%   | Height% |
|-------|----------------|--------|--------|---------|---------|
| 1     | 1.133          | 2047   | 186    | 0.614   | 0.222   |
| 2     | 1.274          | 2081   | 279    | 0.624   | 0.333   |
| 3     | 1.530          | 2403   | 571    | 0.720   | 0.681   |
| 4     | 8.767          | 317604 | 80835  | 95.201  | 96.377  |
| 5     | 11.426         | 5462   | 980    | 1.637   | 1.169   |
| 6     | 11.831         | 4018   | 1023   | 1.204   | 1.219   |
| Total |                | 333616 | 83874  | 100.000 | 100.000 |

#### 44n

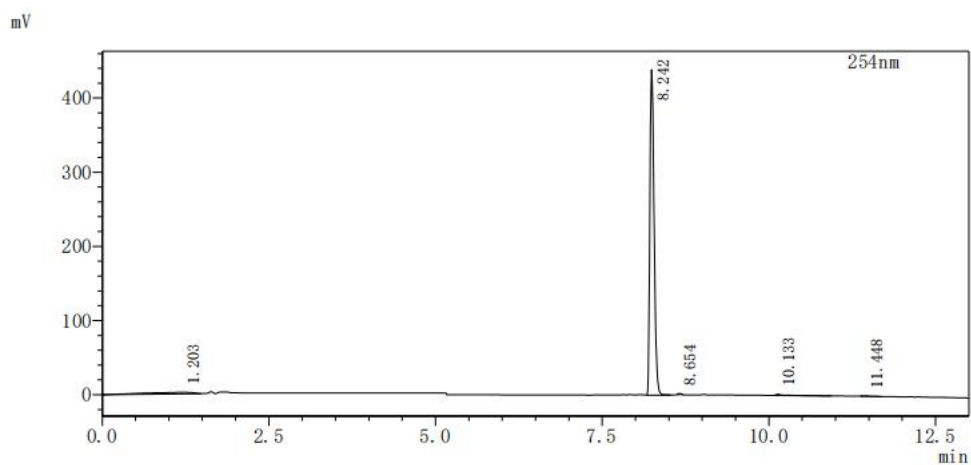

| Peak  | Retention time | Area    | Height | Concentration | Height% |
|-------|----------------|---------|--------|---------------|---------|
| 1     | 1.203          | 125723  | 2181   | 6.084         | 0.491   |
| 2     | 8.242          | 1921399 | 438886 | 92.978        | 98.737  |
| 3     | 8.654          | 3270    | 1155   | 0.158         | 0.260   |
| 4     | 10.133         | 13298   | 1706   | 0.643         | 0.384   |
| 5     | 11.448         | 2830    | 571    | 0.137         | 0.128   |
| Total |                | 2066519 | 444499 |               | 100.000 |
